# Supplementary material for: Claroideglomus etunicatum enhances Pteris vittata L. arsenic resistance and accumulation by mediating the rapid reduction and transport of arsenic in roots
Source: Front Plant Sci. 2024 Nov 13;15:1464547. doi: 10.3389/fpls.2024.1464547 (PMC11598345; doi:10.3389/fpls.2024.1464547)
Supplement: Supplementary file 1 [file DataSheet1.docx]

**Supporting Information**

***Claroidoglomus etunicatum* enhances *Pteris vittata* L. arsenic resistance and accumulation by mediating the rapid reduction and transport of arsenic in roots**

*Guofei Pan a1, YueZhen Xu a1, WeiZhen Li a1, Linyan Zan a, Xueli Wang a, **

a Guangxi Key Laboratory for Agro-Environment and Agro-Products Safety, State Key Laboratory for Conservation and Utilization of Subtropical Agri–Bioresources, National Demonstration Center for Experimental Plant Science Education, College of Agriculture, Guangxi University, Nanning 530004, China.

1These authors contributed to the work equllly.

***Corresponding author:**

Xueli Wang, E-mail: [wxl0524@126.com](mailto:wxl0524@126.com)

**
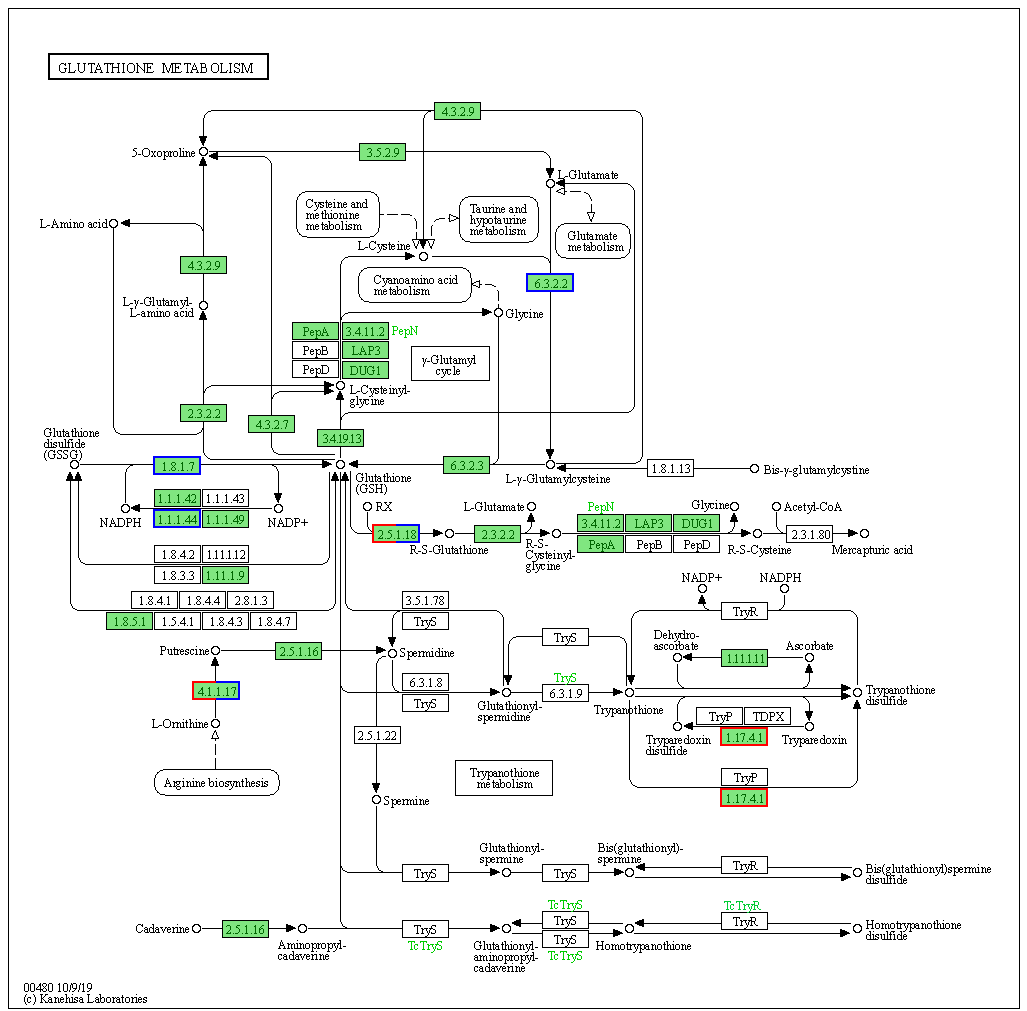
**

**Fig. S1 Differential gene metabolic pathway diagram**

**
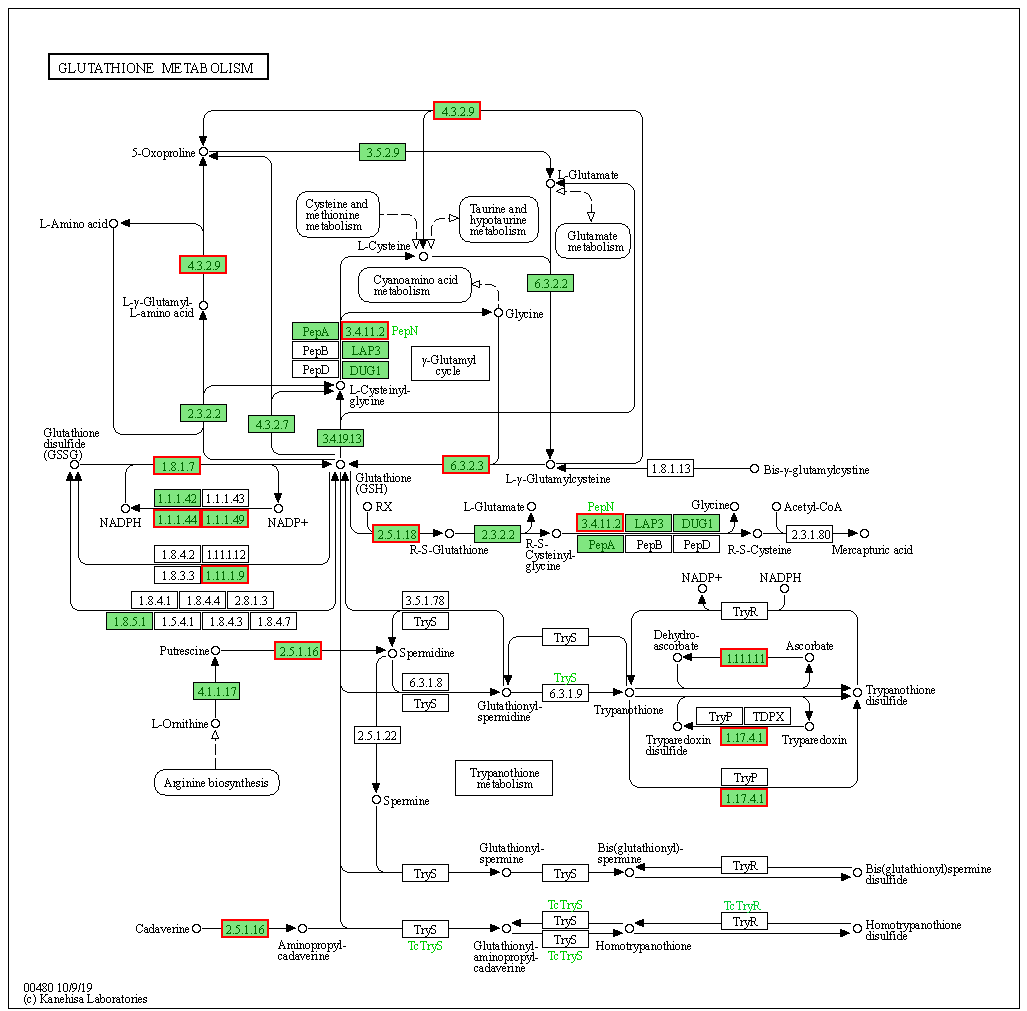
**

**Fig. S2** **Leading Edge metabolic pathway diagram**

**Table S1**

Physical and chemical properties of the tested soil.

| **longitude** | **latitude** | **Total Arsenic (mg kg-1)** | **pH** | **Organic matter**  **(g kg-1)** | **Available phosphorus**  **(mg kg-1)** | **Available potassium**  **(mg kg-1)** |
| --- | --- | --- | --- | --- | --- | --- |
| 108.8242 N | 22.7143 E | 7.78 | 4.49 | 12.02 | 1.77 | 38.77 |

**Table S2**

Primers of protein gene were determined

| **Gene Name** | **Gene ID** | **Primer-F** | **Primer-R** |
| --- | --- | --- | --- |
| *β-Actin* |  | GGGCAGTATTTCCAAGCATAGTGGG | TGCCTCGCTTTGATTGAGCCTCATC |
| *PvPIP1-1* | TRINITY_DN1610_c1_g1 | GCTTGGTGCCGAGATTGTTG | TGGTCATCCCATGCTTGCTT |
| *PvNIP6-1* | TRINITY_DN13097_c0_g1 | GGAGGGTGCTGCGATTATGA | AAAGGCACCTCTGACCATCG |
| *PvPIP2-1* | TRINITY_DN1669_c1_g1 | GCCACCCTCCTCTTCCTCTA | ATTGCGCCACCATGTACAGA |
| *PvPht1;1* | TRINITY_DN35649_c0_g1 | CCCTCATTGCACTCTGCTCA | CAACCGTGCAGGGAAGATCT |
| *PvPht2;1* | TRINITY_DN11245_c0_g1 | CATGGAGCCGGTGAAGTAGG | TTGGCAAGCTTGACTCCCAT |
| *PvGSTF1* | TRINITY_DN26745_c0_g1 | GCCACCCTCCTCTTCCTCTA | ATTGCGCCACCATGTACAGA |
| *PvGAPC1* | TRINITY_DN10105_c0_g1 | GTATGACTCTACCCACGGCG | TCTCGTTGACACCCATCACG |
| *PvACr2* | TRINITY_DN2794_c0_g2 | CCTCACAAAAGGCTTCCCCA | AAGCCGCACCACAGGTTTAT |
| *PvOCT4* | TRINITY_DN9350_c0_g1 | GTCGTGCTGGTTTGGTTCAC | GCGTCTACCGATATGCCGAA |
| *PvPht1;3* | TRINITY_DN688_c0_g1 | AAGCCGATACAGATGCAGGG | CCCCACCTGATTCTTGTCCC |
| *PvNRT1/ PTR FAMILY 5.1* | TRINITY_DN158_c0_g1 | CAACAAGCATTCCACGGGTG | CCCCATCTGCGTCGTTAAGT |
| *PvNRT1/ PTR FAMILY 6-3* | TRINITY_DN13756_c0_g1 | ACACCCACCAACTCTCGTTC | CTCCACTGAGCAAGTCCTCC |
| *PvNRT1/ PTR FAMILY 6-3* | TRINITY_DN14280_c0_g1 | ATGAGCAAGGGGTGTGGATG | AGCTGGTGGGATCTTGAAGC |
| *PvPATP1* | TRINITY_DN10629_c0_g1 | CCTGGTGATGTTGTCGAGCT | ACTGCCATACTCTCTCCGGT |
| *PvPATP1-3* | TRINITY_DN2110_c0_g1 | GCCTTCAACACGGGAGATGA | GCGCCATACTTTGACACAGC |
| *PvPATP2* | TRINITY_DN7892_c0_g1 | GTGAAGCCCAGTCCCTTACC | GTGAGCCGACTTTGACTCCA |

**Table S3**

Sequencing data statistics table

| **Sample** | **Raw reads** | **Raw bases** | **Clean reads** | **Clean bases** | **Error rate(%)** | **Q20(%)** | **Q30(%)** | **GC content(%)** |
| --- | --- | --- | --- | --- | --- | --- | --- | --- |
| CE4 | 54163030 | 8178617530 | 53459024 | 7954592963 | 0.0255 | 97.82 | 93.73 | 47.54 |
| CE2 | 58907230 | 8894991730 | 58255562 | 8685506981 | 0.025 | 98 | 94.17 | 47.41 |
| CE1 | 46849630 | 7074294130 | 46221764 | 6879119225 | 0.0253 | 97.85 | 93.84 | 47.89 |
| CK3 | 47776730 | 7214286230 | 47185188 | 7011220057 | 0.0252 | 97.91 | 93.93 | 47.74 |
| CK2 | 49030528 | 7.4E+09 | 48424306 | 7.22E+09 | 0.0253 | 97.87 | 93.83 | 47.43 |
| CK1 | 55384560 | 8.36E+09 | 54719576 | 8.16E+09 | 0.0251 | 97.99 | 94.11 | 47.68 |
