# Supplementary material for: Claroideglomus etunicatum enhances Pteris vittata L. arsenic resistance and accumulation by mediating the rapid reduction and transport of arsenic in roots
Source: Front Plant Sci. 2024 Nov 13;15:1464547. doi: 10.3389/fpls.2024.1464547 (PMC11598345; doi:10.3389/fpls.2024.1464547)
Supplement: Supplementary file 5 [file DataSheet4.xlsx]

## Sheet: ABC
Gene_id	NR description	CE4	CE2	CE1	CK3	CK2	CK1	CE	CK	GO_id	GO_term	KO_id	KO_name	Pathway_id	Pathway_definition	EggNOG_id	EggNOG_Functional Categories	Swiss-Prot_hit-name	Swiss-Prot_description	Pfam_id	Domain	Domain description
TRINITY_DN12546_c0_g1	PREDICTED: ABC transporter F family member 1 isoform X1 [Nelumbo nucifera])	294.38	259.28	281.25	236.28	247.93	293.98	278.303	259.397	GO:0016887;GO:0005524	MF:ATPase activity;MF:ATP binding;	K06185	ABCF2	------	------	COG0488	S:Function unknown)	sp|Q9FJH6|AB1F_ARATH;	ABC transporter F family member 1 OS=Arabidopsis thaliana OX=3702 GN=ABCF1 PE=2 SV=1;	PF00005;PF12848;PF13304;PF13476	ABC_tran;ABC_tran_Xtn;AAA_21;AAA_23	ABC transporter;ABC transporter;AAA domain, putative AbiEii toxin, Type IV TA system;AAA domain
TRINITY_DN4091_c0_g2	unnamed protein product, partial [Vitis vinifera])	141.14	126.35	183.91	104.94	120.06	118.92	150.467	114.64	GO:0006415;GO:0000054;GO:0006413;GO:0016887;GO:0005506;GO:0043024;GO:0005524	BP:translational termination;BP:ribosomal subunit export from nucleus;BP:translational initiation;MF:ATPase activity;MF:iron ion binding;MF:ribosomal small subunit binding;MF:ATP binding;	K06174	ABCE1, Rli1	------	------	COG1245	S:Function unknown)	sp|Q8LPJ4|AB2E_ARATH;	ABC transporter E family member 2 OS=Arabidopsis thaliana OX=3702 GN=ABCE2 PE=2 SV=1;	PF00005;PF04068;PF02463;PF00037;PF13175;PF12837;PF12797;PF12838;PF14697	ABC_tran;RLI;SMC_N;Fer4;AAA_15;Fer4_6;Fer4_2;Fer4_7;Fer4_21	ABC transporter;Possible Fer4-like domain in RNase L inhibitor, RLI;RecF/RecN/SMC N terminal domain;4Fe-4S binding domain;AAA ATPase domain;4Fe-4S binding domain;4Fe-4S binding domain;4Fe-4S dicluster domain;4Fe-4S dicluster domain
TRINITY_DN792_c0_g1	multidrug resistance associated protein 2 [Pinus radiata])	99.04	117.27	80.43	69.61	91.83	94.2	98.9133	85.2133	GO:0055085;GO:0016021;GO:0016020;GO:0000325;GO:0005774;GO:0042626;GO:0016887;GO:0005524	BP:transmembrane transport;CC:integral component of membrane;CC:membrane;CC:plant-type vacuole;CC:vacuolar membrane;MF:ATPase activity, coupled to transmembrane movement of substances;MF:ATPase activity;MF:ATP binding;	------	------	------	------	COG1132	V:Defense mechanisms)	sp|Q42093|AB2C_ARATH;	ABC transporter C family member 2 OS=Arabidopsis thaliana OX=3702 GN=ABCC2 PE=1 SV=2;	PF00664;PF00005;PF02463;PF01926	ABC_membrane;ABC_tran;SMC_N;MMR_HSR1	ABC transporter transmembrane region;ABC transporter;RecF/RecN/SMC N terminal domain;50S ribosome-binding GTPase
TRINITY_DN3245_c0_g1	PREDICTED: ABC transporter B family member 19-like [Ipomoea nil])	91.34	99.09	100.97	114.66	73.51	65.03	97.1333	84.4	GO:0009733;GO:0048443;GO:0010540;GO:0009637;GO:0043481;GO:0009958;GO:0008361;GO:0090691;GO:0010218;GO:0010541;GO:0048527;GO:0055085;GO:0009640;GO:0016021;GO:0005886;GO:0042626;GO:0010329;GO:0016887;GO:0005524	BP:response to auxin;BP:stamen development;BP:basipetal auxin transport;BP:response to blue light;BP:anthocyanin accumulation in tissues in response to UV light;BP:positive gravitropism;BP:regulation of cell size;BP:formation of plant organ boundary;BP:response to far red light;BP:acropetal auxin transport;BP:lateral root development;BP:transmembrane transport;BP:photomorphogenesis;CC:integral co…	K05658	ABCB1, CD243	map02010	ABC transporters)	COG1132	V:Defense mechanisms)	sp|Q9LJX0|AB19B_ARATH;	ABC transporter B family member 19 OS=Arabidopsis thaliana OX=3702 GN=ABCB19 PE=1 SV=1;	PF00664;PF00005;PF02463;PF13191;PF09818;PF13555	ABC_membrane;ABC_tran;SMC_N;AAA_16;ABC_ATPase;AAA_29	ABC transporter transmembrane region;ABC transporter;RecF/RecN/SMC N terminal domain;AAA ATPase domain;Predicted ATPase of the ABC class;P-loop containing region of AAA domain
TRINITY_DN3105_c0_g1	unknown [Picea sitchensis])	78.54	78.74	84.82	84.37	72.97	70.58	80.7	75.9733	GO:0006886;GO:0032482;GO:0005794;GO:0012505;GO:0003924;GO:0005525	BP:intracellular protein transport;BP:Rab protein signal transduction;CC:Golgi apparatus;CC:endomembrane system;MF:GTPase activity;MF:GTP binding;	K07910	RAB18	------	------	ENOG410XPD0	S:Function unknown)	sp|O23657|RABC1_ARATH;	Ras-related protein RABC1 OS=Arabidopsis thaliana OX=3702 GN=RABC1 PE=1 SV=1;	PF00071;PF08477;PF00025;PF01926;PF04670;PF09439	Ras;Roc;Arf;MMR_HSR1;Gtr1_RagA;SRPRB	Ras family;Ras of Complex, Roc, domain of DAPkinase;ADP-ribosylation factor family;50S ribosome-binding GTPase;Gtr1/RagA G protein conserved region;Signal recognition particle receptor beta subunit
TRINITY_DN801_c1_g1	ABC transporter B family member 2-like isoform X2 [Olea europaea var. sylvestris])	63.41	93.71	82.33	114.69	74.17	72.46	79.8167	87.1067	GO:0055085;GO:0016021;GO:0042626;GO:0016887;GO:0005524	BP:transmembrane transport;CC:integral component of membrane;MF:ATPase activity, coupled to transmembrane movement of substances;MF:ATPase activity;MF:ATP binding;	K05658	ABCB1, CD243	map02010	ABC transporters)	COG1132	V:Defense mechanisms)	sp|Q9LJX0|AB19B_ARATH;	ABC transporter B family member 19 OS=Arabidopsis thaliana OX=3702 GN=ABCB19 PE=1 SV=1;	PF00664	ABC_membrane	ABC transporter transmembrane region
TRINITY_DN21608_c0_g3	Multidrug resistance protein ABC transporter family [Zostera marina])	57.04	59.11	97	77.34	139.98	77.45	71.05	98.2567	GO:0055085;GO:0016021;GO:0016020;GO:0000325;GO:0005774;GO:0042626;GO:0016887;GO:0005524	BP:transmembrane transport;CC:integral component of membrane;CC:membrane;CC:plant-type vacuole;CC:vacuolar membrane;MF:ATPase activity, coupled to transmembrane movement of substances;MF:ATPase activity;MF:ATP binding;	K05673	ABCC4	map02010	ABC transporters)	COG1132	V:Defense mechanisms)	sp|Q42093|AB2C_ARATH;	ABC transporter C family member 2 OS=Arabidopsis thaliana OX=3702 GN=ABCC2 PE=1 SV=2;	------	------	------
TRINITY_DN8841_c0_g1	PREDICTED: ABC transporter F family member 3 [Vitis vinifera])	63.06	66.46	78.19	56.86	64.8	71.13	69.2367	64.2633	GO:0016887;GO:0005524	MF:ATPase activity;MF:ATP binding;	K06158	ABCF3	------	------	COG0488	S:Function unknown)	sp|Q8H0V6|AB3F_ARATH;	ABC transporter F family member 3 OS=Arabidopsis thaliana OX=3702 GN=ABCF3 PE=1 SV=1;	PF00005;PF12848;PF13304	ABC_tran;ABC_tran_Xtn;AAA_21	ABC transporter;ABC transporter;AAA domain, putative AbiEii toxin, Type IV TA system
TRINITY_DN8248_c0_g1	hypothetical protein F3Y22_tig00110044pilonHSYRG00150 [Hibiscus syriacus])	41.5	65.15	100.44	161.97	46.2	38.75	69.03	82.3067	GO:0016021;GO:0009507;GO:0005524;GO:0004672	CC:integral component of membrane;CC:chloroplast;MF:ATP binding;MF:protein kinase activity;	K08869	ADCK, ABC1	------	------	COG0661	S:Function unknown)	sp|Q55680|Y005_SYNY3;	Uncharacterized protein sll0005 OS=Synechocystis sp.;	PF03109;PF01636;PF00069	ABC1;APH;Pkinase	ABC1 family;Phosphotransferase enzyme family;Protein kinase domain
TRINITY_DN13426_c0_g1	ABC transporter C family member 8 [Dendrobium catenatum])	94.83	69.73	38.19	64.91	55.79	91.66	67.5833	70.7867	GO:0055085;GO:0016021;GO:0016020;GO:0000325;GO:0005774;GO:0042626;GO:0016887;GO:0005524	BP:transmembrane transport;CC:integral component of membrane;CC:membrane;CC:plant-type vacuole;CC:vacuolar membrane;MF:ATPase activity, coupled to transmembrane movement of substances;MF:ATPase activity;MF:ATP binding;	sbi;K05665;pda	;ABCC1;	map02010	ABC transporters)	COG1132	V:Defense mechanisms)	sp|Q8LGU1|AB8C_ARATH;	ABC transporter C family member 8 OS=Arabidopsis thaliana OX=3702 GN=ABCC8 PE=2 SV=3;	PF00664	ABC_membrane	ABC transporter transmembrane region
TRINITY_DN6228_c0_g1	PREDICTED: ABC transporter G family member 36-like [Nelumbo nucifera])	59.25	59.33	51.24	60.94	66	70.49	56.6067	65.81	GO:0055085;GO:0016021;GO:0005886;GO:0042626;GO:0016887;GO:0005524	BP:transmembrane transport;CC:integral component of membrane;CC:plasma membrane;MF:ATPase activity, coupled to transmembrane movement of substances;MF:ATPase activity;MF:ATP binding;	------	------	------	------	COG0842	V:Defense mechanisms)	sp|Q5Z9S8|AB42G_ORYSJ;	ABC transporter G family member 42 OS=Oryza sativa subsp. japonica OX=39947 GN=ABCG42 PE=2 SV=1;	PF01061;PF00005;PF14510;PF19055	ABC2_membrane;ABC_tran;ABC_trans_N;ABC2_membrane_7	ABC-2 type transporter;ABC transporter;ABC-transporter N-terminal;ABC-2 type transporter
TRINITY_DN3169_c0_g1	ABC transporter A family member 2-like [Nymphaea colorata])	43.69	65.57	52.21	55.62	48.87	48.42	53.8233	50.97	GO:0016021;GO:0042626;GO:0016887;GO:0005524	CC:integral component of membrane;MF:ATPase activity, coupled to transmembrane movement of substances;MF:ATPase activity;MF:ATP binding;	------	------	------	------	ENOG410XXUP	S:Function unknown)	sp|Q84K47|AB2A_ARATH;	ABC transporter A family member 2 OS=Arabidopsis thaliana OX=3702 GN=ABCA2 PE=2 SV=1;	PF12698	ABC2_membrane_3	ABC-2 family transporter protein
TRINITY_DN9855_c0_g2	multidrug resistance-associated protein 1-like [Rhodamnia argentea])	39.34	53.31	65.42	42.62	91.94	43.43	52.69	59.33	GO:0055085;GO:0016021;GO:0016020;GO:0000325;GO:0005774;GO:0042626;GO:0016887;GO:0005524	BP:transmembrane transport;CC:integral component of membrane;CC:membrane;CC:plant-type vacuole;CC:vacuolar membrane;MF:ATPase activity, coupled to transmembrane movement of substances;MF:ATPase activity;MF:ATP binding;	K05668	ABCC5	map02010	ABC transporters)	COG1132	V:Defense mechanisms)	sp|Q9C8G9|AB1C_ARATH;	ABC transporter C family member 1 OS=Arabidopsis thaliana OX=3702 GN=ABCC1 PE=1 SV=1;	PF00005	ABC_tran	ABC transporter
TRINITY_DN6480_c0_g1	ABC transporter C family member 12 [Medicago truncatula])	41.26	52.13	57.78	57.13	57.01	45.04	50.39	53.06	GO:0055085;GO:0016021;GO:0016020;GO:0000325;GO:0005774;GO:0042626;GO:0016887;GO:0005524	BP:transmembrane transport;CC:integral component of membrane;CC:membrane;CC:plant-type vacuole;CC:vacuolar membrane;MF:ATPase activity, coupled to transmembrane movement of substances;MF:ATPase activity;MF:ATP binding;	K05673;K05666	ABCC4;ABCC2	map02010	ABC transporters)	COG1132	V:Defense mechanisms)	sp|O15439|MRP4_HUMAN;	Multidrug resistance-associated protein 4 OS=Homo sapiens OX=9606 GN=ABCC4 PE=1 SV=3;	PF00005;PF00664	ABC_tran;ABC_membrane	ABC transporter;ABC transporter transmembrane region
TRINITY_DN953_c0_g1	ABC transporter B family member 19 [Nymphaea thermarum])	48.79	48.38	52.94	52.88	52.16	35.5	50.0367	46.8467	GO:0009733;GO:0048443;GO:0010540;GO:0009637;GO:0043481;GO:0009958;GO:0008361;GO:0090691;GO:0010218;GO:0010541;GO:0048527;GO:0055085;GO:0009640;GO:0016021;GO:0005886;GO:0042626;GO:0010329;GO:0016887;GO:0005524	BP:response to auxin;BP:stamen development;BP:basipetal auxin transport;BP:response to blue light;BP:anthocyanin accumulation in tissues in response to UV light;BP:positive gravitropism;BP:regulation of cell size;BP:formation of plant organ boundary;BP:response to far red light;BP:acropetal auxin transport;BP:lateral root development;BP:transmembrane transport;BP:photomorphogenesis;CC:integral co…	ccaj;K05658	;ABCB1, CD243	map02010	ABC transporters)	COG1132	V:Defense mechanisms)	sp|Q9LJX0|AB19B_ARATH;	ABC transporter B family member 19 OS=Arabidopsis thaliana OX=3702 GN=ABCB19 PE=1 SV=1;	PF00664;PF00005	ABC_membrane;ABC_tran	ABC transporter transmembrane region;ABC transporter
TRINITY_DN7720_c0_g1	ABC transporter A family member 7-like isoform X1 [Vitis riparia])	46.96	59.09	41.26	49.07	55.3	61.56	49.1033	55.31	GO:0006869;GO:0043231;GO:0016021;GO:0005319;GO:0042626;GO:0016887;GO:0005524	BP:lipid transport;CC:intracellular membrane-bounded organelle;CC:integral component of membrane;MF:lipid transporter activity;MF:ATPase activity, coupled to transmembrane movement of substances;MF:ATPase activity;MF:ATP binding;	------	------	------	------	ENOG410XR3G;COG0330	S:Function unknown);	sp|Q9STT5|AB7A_ARATH;	ABC transporter A family member 7 OS=Arabidopsis thaliana OX=3702 GN=ABCA7 PE=3 SV=2;	PF00005;PF13304	ABC_tran;AAA_21	ABC transporter;AAA domain, putative AbiEii toxin, Type IV TA system
TRINITY_DN4641_c0_g2	unknown [Picea sitchensis])	55.13	50.28	39.58	46.06	44.92	45.51	48.33	45.4967	GO:0055072;GO:1901031;GO:0046467;GO:0016021;GO:0016301;GO:0004672	BP:iron ion homeostasis;BP:regulation of response to reactive oxygen species;BP:membrane lipid biosynthetic process;CC:integral component of membrane;MF:kinase activity;MF:protein kinase activity;	------	------	------	------	COG0661	O:Posttranslational modification, protein turnover, chaperones)	sp|Q93Y08|AB1K8_ARATH;	Protein ACTIVITY OF BC1 COMPLEX KINASE 8, chloroplastic OS=Arabidopsis thaliana OX=3702 GN=ABC1K8 PE=2 SV=1;	PF03109;PF01636	ABC1;APH	ABC1 family;Phosphotransferase enzyme family
TRINITY_DN14677_c0_g2	hypothetical protein FH972_023664 [Carpinus fangiana])	47.97	50.82	42.43	39.54	71.76	31.38	47.0733	47.56	GO:0016021;GO:0042626;GO:0016887;GO:0005524	CC:integral component of membrane;MF:ATPase activity, coupled to transmembrane movement of substances;MF:ATPase activity;MF:ATP binding;	K05666	ABCC2	map02010	ABC transporters)	COG1132	V:Defense mechanisms)	sp|Q54P13|ABCC8_DICDI;	ABC transporter C family member 8 OS=Dictyostelium discoideum OX=44689 GN=abcC8 PE=3 SV=1;	PF00664	ABC_membrane	ABC transporter transmembrane region
TRINITY_DN887_c0_g1	ABC transporter G family member 29-like [Vitis riparia])	37.17	41.76	62.29	48.8	48.85	48.81	47.0733	48.82	GO:0055085;GO:0016021;GO:0005886;GO:0042626;GO:0016887;GO:0005524	BP:transmembrane transport;CC:integral component of membrane;CC:plasma membrane;MF:ATPase activity, coupled to transmembrane movement of substances;MF:ATPase activity;MF:ATP binding;	------	------	------	------	COG0842	V:Defense mechanisms)	sp|Q5Z9S8|AB42G_ORYSJ;	ABC transporter G family member 42 OS=Oryza sativa subsp. japonica OX=39947 GN=ABCG42 PE=2 SV=1;	PF01061;PF00005;PF14510;PF19055;PF00004;PF06414	ABC2_membrane;ABC_tran;ABC_trans_N;ABC2_membrane_7;AAA;Zeta_toxin	ABC-2 type transporter;ABC transporter;ABC-transporter N-terminal;ABC-2 type transporter;ATPase family associated with various cellular activities (AAA);Zeta toxin
TRINITY_DN3953_c0_g1	ABC transporter C family member 8-like [Prunus avium])	62.36	51.28	26.67	48.18	52.49	70.47	46.77	57.0467	GO:0016021;GO:0042626;GO:0016887;GO:0005524	CC:integral component of membrane;MF:ATPase activity, coupled to transmembrane movement of substances;MF:ATPase activity;MF:ATP binding;	K05665	ABCC1	map02010	ABC transporters)	COG1132	V:Defense mechanisms)	sp|Q8LGU1|AB8C_ARATH;	ABC transporter C family member 8 OS=Arabidopsis thaliana OX=3702 GN=ABCC8 PE=2 SV=3;	PF00005;PF00664	ABC_tran;ABC_membrane	ABC transporter;ABC transporter transmembrane region
TRINITY_DN233_c1_g1	ABC transporter C family member 8 [Cinnamomum micranthum f. kanehirae])	66.59	46.98	25.65	46.28	49.66	77.41	46.4067	57.7833	GO:0055085;GO:0016021;GO:0016020;GO:0000325;GO:0005774;GO:0042626;GO:0016887;GO:0005524	BP:transmembrane transport;CC:integral component of membrane;CC:membrane;CC:plant-type vacuole;CC:vacuolar membrane;MF:ATPase activity, coupled to transmembrane movement of substances;MF:ATPase activity;MF:ATP binding;	------	------	------	------	COG1132	V:Defense mechanisms)	sp|Q8LGU1|AB8C_ARATH;	ABC transporter C family member 8 OS=Arabidopsis thaliana OX=3702 GN=ABCC8 PE=2 SV=3;	PF00005;PF00664	ABC_tran;ABC_membrane	ABC transporter;ABC transporter transmembrane region
TRINITY_DN5630_c0_g1	ABC transporter F family member 4 [Ipomoea triloba])	42.95	39.44	52.53	37.56	37.39	44.72	44.9733	39.89	GO:0016887;GO:0005524	MF:ATPase activity;MF:ATP binding;	K06184	ABCF1	------	------	COG0488	T:Signal transduction mechanisms)	sp|Q9M1H3|AB4F_ARATH;	ABC transporter F family member 4 OS=Arabidopsis thaliana OX=3702 GN=ABCF4 PE=2 SV=1;	PF00005;PF13304;PF03193;PF13555;PF01926;PF13476;PF12848	ABC_tran;AAA_21;RsgA_GTPase;AAA_29;MMR_HSR1;AAA_23;ABC_tran_Xtn	ABC transporter;AAA domain, putative AbiEii toxin, Type IV TA system;RsgA GTPase;P-loop containing region of AAA domain;50S ribosome-binding GTPase;AAA domain;ABC transporter
TRINITY_DN2071_c0_g1	ABC transporter G family member 37-like [Hevea brasiliensis])	48.54	42.26	41.31	65.77	58.69	41.93	44.0367	55.4633	GO:0016021;GO:0016887;GO:0005524	CC:integral component of membrane;MF:ATPase activity;MF:ATP binding;	------	------	------	------	COG1131;COG0842	V:Defense mechanisms);	sp|Q7PC86|AB35G_ARATH;	ABC transporter G family member 35 OS=Arabidopsis thaliana OX=3702 GN=ABCG35 PE=2 SV=1;	PF01061;PF00005;PF19055;PF08370;PF12698	ABC2_membrane;ABC_tran;ABC2_membrane_7;PDR_assoc;ABC2_membrane_3	ABC-2 type transporter;ABC transporter;ABC-2 type transporter;Plant PDR ABC transporter associated;ABC-2 family transporter protein
TRINITY_DN222_c0_g1	ABC transporter G family member 29-like [Ziziphus jujuba])	35.83	65.47	25.89	57.19	37.17	11.72	42.3967	35.36	GO:0016021;GO:0016887;GO:0005524	CC:integral component of membrane;MF:ATPase activity;MF:ATP binding;	------	------	------	------	COG0842	V:Defense mechanisms)	sp|Q5Z9S8|AB42G_ORYSJ;	ABC transporter G family member 42 OS=Oryza sativa subsp. japonica OX=39947 GN=ABCG42 PE=2 SV=1;	PF01061;PF00005;PF08370;PF19055;PF13304;PF13191;PF13555;PF00004;PF13401;PF14510;PF13238;PF05729;PF13604;PF03266	ABC2_membrane;ABC_tran;PDR_assoc;ABC2_membrane_7;AAA_21;AAA_16;AAA_29;AAA;AAA_22;ABC_trans_N;AAA_18;NACHT;AAA_30;NTPase_1	ABC-2 type transporter;ABC transporter;Plant PDR ABC transporter associated;ABC-2 type transporter;AAA domain, putative AbiEii toxin, Type IV TA system;AAA ATPase domain;P-loop containing region of AAA domain;ATPase family associated with various cellular activities (AAA);AAA domain;ABC-transporter N-terminal;AAA domain;NACHT domain;AAA domain;NTPase
TRINITY_DN1073_c0_g1	LOW QUALITY PROTEIN: ABC transporter G family member 11-like [Pistacia vera])	51.74	33.14	39.45	31.36	53.89	30.38	41.4433	38.5433	GO:0055085;GO:0016021;GO:0005886;GO:0042626;GO:0016887;GO:0005524	BP:transmembrane transport;CC:integral component of membrane;CC:plasma membrane;MF:ATPase activity, coupled to transmembrane movement of substances;MF:ATPase activity;MF:ATP binding;	------	------	------	------	COG1131	V:Defense mechanisms)	sp|Q8RXN0|AB11G_ARATH;	ABC transporter G family member 11 OS=Arabidopsis thaliana OX=3702 GN=ABCG11 PE=1 SV=1;	PF00005;PF19055;PF13304;PF02463;PF03193;PF13191;PF01061;PF02224;PF13481;PF03215;PF01926	ABC_tran;ABC2_membrane_7;AAA_21;SMC_N;RsgA_GTPase;AAA_16;ABC2_membrane;Cytidylate_kin;AAA_25;Rad17;MMR_HSR1	ABC transporter;ABC-2 type transporter;AAA domain, putative AbiEii toxin, Type IV TA system;RecF/RecN/SMC N terminal domain;RsgA GTPase;AAA ATPase domain;ABC-2 type transporter;Cytidylate kinase;AAA domain;Rad17 P-loop domain;50S ribosome-binding GTPase
TRINITY_DN186_c0_g1	PREDICTED: ABC transporter G family member 22-like isoform X1 [Oryza brachyantha])	20.68	46.9	56.25	52.68	33.46	45.41	41.2767	43.85	GO:0055085;GO:0016021;GO:0005886;GO:0042626;GO:0016887;GO:0005524	BP:transmembrane transport;CC:integral component of membrane;CC:plasma membrane;MF:ATPase activity, coupled to transmembrane movement of substances;MF:ATPase activity;MF:ATP binding;	------	------	------	------	COG1131	V:Defense mechanisms)	sp|Q93YS4|AB22G_ARATH;	ABC transporter G family member 22 OS=Arabidopsis thaliana OX=3702 GN=ABCG22 PE=1 SV=1;	PF01061;PF00005;PF19055	ABC2_membrane;ABC_tran;ABC2_membrane_7	ABC-2 type transporter;ABC transporter;ABC-2 type transporter
TRINITY_DN16312_c0_g1	hypothetical protein Lal_00004257 [Lupinus albus])	32.05	43.37	47.43	30.55	64.07	34.76	40.95	43.1267	GO:0016021;GO:0042626;GO:0016887;GO:0005524	CC:integral component of membrane;MF:ATPase activity, coupled to transmembrane movement of substances;MF:ATPase activity;MF:ATP binding;	K05673;K05666	ABCC4;ABCC2	map02010	ABC transporters)	COG1132	V:Defense mechanisms)	sp|Q8HXQ5|MRP1_BOVIN;	Multidrug resistance-associated protein 1 OS=Bos taurus OX=9913 GN=ABCC1 PE=1 SV=1;	------	------	------
TRINITY_DN8898_c0_g2	hypothetical protein AQUCO_01200196v1 [Aquilegia coerulea])	33.15	37.7	49.2	22.09	67.03	39.75	40.0167	42.9567	GO:0016021;GO:0042626;GO:0016887;GO:0005524	CC:integral component of membrane;MF:ATPase activity, coupled to transmembrane movement of substances;MF:ATPase activity;MF:ATP binding;	K05673;K05666	ABCC4;ABCC2	map02010	ABC transporters)	COG1132	V:Defense mechanisms)	sp|G4N2B5|ABC7_MAGO7;	ABC transporter 7 OS=Magnaporthe oryzae;	PF00005;PF01935	ABC_tran;DUF87	ABC transporter;Helicase HerA, central domain
TRINITY_DN468_c0_g1	hypothetical protein AQUCO_00300743v1 [Aquilegia coerulea])	50.99	29.39	36.52	41.42	23.86	34.16	38.9667	33.1467	GO:0055085;GO:0016021;GO:0016020;GO:0000325;GO:0005774;GO:0042626;GO:0016887;GO:0005524	BP:transmembrane transport;CC:integral component of membrane;CC:membrane;CC:plant-type vacuole;CC:vacuolar membrane;MF:ATPase activity, coupled to transmembrane movement of substances;MF:ATPase activity;MF:ATP binding;	K05666	ABCC2	map02010	ABC transporters)	COG1132	V:Defense mechanisms)	sp|Q7DM58|AB4C_ARATH;	ABC transporter C family member 4 OS=Arabidopsis thaliana OX=3702 GN=ABCC4 PE=1 SV=2;	PF00664;PF00005;PF13555;PF00350	ABC_membrane;ABC_tran;AAA_29;Dynamin_N	ABC transporter transmembrane region;ABC transporter;P-loop containing region of AAA domain;Dynamin family
TRINITY_DN11813_c0_g1	hypothetical protein F0562_003214 [Nyssa sinensis])	34.57	38.68	40.71	64.72	46.97	26.99	37.9867	46.2267	GO:0055085;GO:0016021;GO:0005886;GO:0042626;GO:0016887;GO:0005524	BP:transmembrane transport;CC:integral component of membrane;CC:plasma membrane;MF:ATPase activity, coupled to transmembrane movement of substances;MF:ATPase activity;MF:ATP binding;	------	------	------	------	COG1131	V:Defense mechanisms)	sp|Q8RXN0|AB11G_ARATH;	ABC transporter G family member 11 OS=Arabidopsis thaliana OX=3702 GN=ABCG11 PE=1 SV=1;	PF00005;PF13304;PF19055;PF02463;PF03193;PF13555;PF01061;PF13191;PF13401;PF02224	ABC_tran;AAA_21;ABC2_membrane_7;SMC_N;RsgA_GTPase;AAA_29;ABC2_membrane;AAA_16;AAA_22;Cytidylate_kin	ABC transporter;AAA domain, putative AbiEii toxin, Type IV TA system;ABC-2 type transporter;RecF/RecN/SMC N terminal domain;RsgA GTPase;P-loop containing region of AAA domain;ABC-2 type transporter;AAA ATPase domain;AAA domain;Cytidylate kinase
TRINITY_DN233_c3_g1	ABC transporter C family member 8-like isoform X3 [Abrus precatorius])	49.65	42.58	20.24	39.23	34.69	46.83	37.49	40.25	GO:0055085;GO:0016021;GO:0016020;GO:0000325;GO:0005774;GO:0042626;GO:0016887;GO:0005524	BP:transmembrane transport;CC:integral component of membrane;CC:membrane;CC:plant-type vacuole;CC:vacuolar membrane;MF:ATPase activity, coupled to transmembrane movement of substances;MF:ATPase activity;MF:ATP binding;	------	------	------	------	COG1132	V:Defense mechanisms)	sp|Q8LGU1|AB8C_ARATH;	ABC transporter C family member 8 OS=Arabidopsis thaliana OX=3702 GN=ABCC8 PE=2 SV=3;	------	------	------
TRINITY_DN3411_c0_g1	ABC transporter B family member 19 [Nymphaea colorata])	45.2	54.67	12.09	33.25	64.38	38.39	37.32	45.34	GO:0009733;GO:0048443;GO:0010540;GO:0009637;GO:0043481;GO:0009958;GO:0008361;GO:0090691;GO:0010218;GO:0010541;GO:0048527;GO:0055085;GO:0009640;GO:0016021;GO:0005886;GO:0042626;GO:0010329;GO:0016887;GO:0005524	BP:response to auxin;BP:stamen development;BP:basipetal auxin transport;BP:response to blue light;BP:anthocyanin accumulation in tissues in response to UV light;BP:positive gravitropism;BP:regulation of cell size;BP:formation of plant organ boundary;BP:response to far red light;BP:acropetal auxin transport;BP:lateral root development;BP:transmembrane transport;BP:photomorphogenesis;CC:integral co…	K05658	ABCB1, CD243	map02010	ABC transporters)	COG1132	V:Defense mechanisms)	sp|Q9LJX0|AB19B_ARATH;	ABC transporter B family member 19 OS=Arabidopsis thaliana OX=3702 GN=ABCB19 PE=1 SV=1;	PF00664;PF00005;PF02463;PF09818;PF13191;PF06414	ABC_membrane;ABC_tran;SMC_N;ABC_ATPase;AAA_16;Zeta_toxin	ABC transporter transmembrane region;ABC transporter;RecF/RecN/SMC N terminal domain;Predicted ATPase of the ABC class;AAA ATPase domain;Zeta toxin
TRINITY_DN9621_c0_g1	hypothetical protein FNV43_RR06414 [Rhamnella rubrinervis])	28.06	42.34	36.54	26.38	64.02	32.55	35.6467	40.9833	GO:0016021;GO:0042626;GO:0016887;GO:0005524	CC:integral component of membrane;MF:ATPase activity, coupled to transmembrane movement of substances;MF:ATPase activity;MF:ATP binding;	K05673;K05666	ABCC4;ABCC2	map02010	ABC transporters)	COG1132	V:Defense mechanisms)	sp|O15439|MRP4_HUMAN;	Multidrug resistance-associated protein 4 OS=Homo sapiens OX=9606 GN=ABCC4 PE=1 SV=3;	PF00664	ABC_membrane	ABC transporter transmembrane region
TRINITY_DN11899_c0_g1	uncharacterized protein LOC18444358 [Amborella trichopoda])	37.65	38.51	30.63	30.28	35.63	35.3	35.5967	33.7367	GO:0016226	BP:iron-sulfur cluster assembly;	------	------	------	------	COG0719	S:Function unknown)	sp|Q9ZS97|AB8I_ARATH;	UPF0051 protein ABCI8, chloroplastic OS=Arabidopsis thaliana OX=3702 GN=ABCI8 PE=2 SV=1;	PF01458	SUFBD	SUF system FeS cluster assembly, SufBD
TRINITY_DN2822_c0_g1	PREDICTED: uncharacterized protein slr0889-like isoform X1 [Nelumbo nucifera])	35.63	32.42	36.93	32.82	29.84	27.56	34.9933	30.0733	GO:0005524;GO:0004672	MF:ATP binding;MF:protein kinase activity;	K08869	ADCK, ABC1	------	------	COG0661	S:Function unknown)	sp|Q6INL7|ADCK1_XENLA;	AarF domain-containing protein kinase 1 OS=Xenopus laevis OX=8355 GN=adck1 PE=2 SV=1;	PF03109	ABC1	ABC1 family
TRINITY_DN1074_c0_g1		4.59	79.68	19.13	34.88	45.45	2.24	34.4667	27.5233	------	------	------	------	------	------	ENOG4111FFX	S:Function unknown)	------	------	PF01926;PF00005;PF03193	MMR_HSR1;ABC_tran;RsgA_GTPase	50S ribosome-binding GTPase;ABC transporter;RsgA GTPase
TRINITY_DN24191_c0_g1	PREDICTED: ABC transporter C family member 3-like isoform X2 [Daucus carota subsp. sativus])	21.47	40.08	40.98	36.5	69.09	23.85	34.1767	43.1467	GO:0016021;GO:0042626;GO:0016887;GO:0005524	CC:integral component of membrane;MF:ATPase activity, coupled to transmembrane movement of substances;MF:ATPase activity;MF:ATP binding;	K05673;K05666	ABCC4;ABCC2	map02010	ABC transporters)	COG1132	V:Defense mechanisms)	sp|Q80WJ6|MRP9_MOUSE;	Multidrug resistance-associated protein 9 OS=Mus musculus OX=10090 GN=Abcc12 PE=2 SV=1;	------	------	------
TRINITY_DN37058_c0_g1	unknown [Picea sitchensis])	34.56	29.31	37.92	26.89	28.91	30.65	33.93	28.8167	GO:0009793;GO:0010027;GO:0016226;GO:0009570	BP:embryo development ending in seed dormancy;BP:thylakoid membrane organization;BP:iron-sulfur cluster assembly;CC:chloroplast stroma;	K09015	sufD	------	------	COG0719	O:Posttranslational modification, protein turnover, chaperones)	sp|Q9LQK7|AB7I_ARATH;	Protein ABCI7, chloroplastic OS=Arabidopsis thaliana OX=3702 GN=ABCI7 PE=1 SV=1;	PF01458	SUFBD	SUF system FeS cluster assembly, SufBD
TRINITY_DN16694_c0_g1		44.46	32.39	22.94	38.39	19.25	18.16	33.2633	25.2667	------	------	------	------	------	------	ENOG4111FFX	S:Function unknown)	------	------	PF01926;PF00005	MMR_HSR1;ABC_tran	50S ribosome-binding GTPase;ABC transporter
TRINITY_DN46808_c0_g1		45.32	33.6	17.33	13.31	32.64	21.09	32.0833	22.3467	------	------	K05666	ABCC2	map02010	ABC transporters)	COG1132	V:Defense mechanisms)	sp|Q54U44|ABCCC_DICDI;	ABC transporter C family member 12 OS=Dictyostelium discoideum OX=44689 GN=abcC12 PE=3 SV=1;	PF00664	ABC_membrane	ABC transporter transmembrane region
TRINITY_DN44132_c0_g1	ABC transporter C family member 14-like [Helianthus annuus])	17.89	38.89	38.88	17.92	54.54	31.11	31.8867	34.5233	GO:0055085;GO:0016021;GO:0016020;GO:0000325;GO:0005774;GO:0042626;GO:0016887;GO:0032440;GO:0005524	BP:transmembrane transport;CC:integral component of membrane;CC:membrane;CC:plant-type vacuole;CC:vacuolar membrane;MF:ATPase activity, coupled to transmembrane movement of substances;MF:ATPase activity;MF:2-alkenal reductase [NA;MF:ATP binding;	K05665;K05666	ABCC1;ABCC2	map02010	ABC transporters)	COG1132	E:Amino acid transport and metabolism)	sp|Q9LZJ5|AB14C_ARATH;	ABC transporter C family member 14 OS=Arabidopsis thaliana OX=3702 GN=ABCC14 PE=1 SV=1;	PF00005	ABC_tran	ABC transporter
TRINITY_DN1908_c0_g1	uncharacterized aarF domain-containing protein kinase At5g05200, chloroplastic [Nymphaea colorata])	31.85	27.93	33.62	29.67	29.34	36.07	31.1333	31.6933	GO:0010287;GO:0016301;GO:0005524;GO:0004672	CC:plastoglobule;MF:kinase activity;MF:ATP binding;MF:protein kinase activity;	K08869	ADCK, ABC1	------	------	COG0661	S:Function unknown)	sp|Q9ASX5|Y5520_ARATH;	Uncharacterized aarF domain-containing protein kinase At5g05200, chloroplastic OS=Arabidopsis thaliana OX=3702 GN=At5g05200 PE=1 SV=1;	PF03109;PF01636	ABC1;APH	ABC1 family;Phosphotransferase enzyme family
TRINITY_DN6265_c0_g1	hypothetical protein AQUCO_02700259v1 [Aquilegia coerulea])	28.74	33.8	29.88	35.11	26.86	30.62	30.8067	30.8633	GO:0055085;GO:0016021;GO:0042626;GO:0016887;GO:0005524	BP:transmembrane transport;CC:integral component of membrane;MF:ATPase activity, coupled to transmembrane movement of substances;MF:ATPase activity;MF:ATP binding;	K05658	ABCB1, CD243	map02010	ABC transporters)	COG1132	V:Defense mechanisms)	sp|Q9M3B9|AB20B_ARATH;	ABC transporter B family member 20 OS=Arabidopsis thaliana OX=3702 GN=ABCB20 PE=1 SV=1;	PF00664;PF00005;PF13555	ABC_membrane;ABC_tran;AAA_29	ABC transporter transmembrane region;ABC transporter;P-loop containing region of AAA domain
TRINITY_DN5256_c0_g1	ABC transporter B family member 19 [Cinnamomum micranthum f. kanehirae])	30.02	19.52	42.38	14.49	22.94	17.09	30.64	18.1733	GO:0055085;GO:0016021;GO:0042626;GO:0016887;GO:0005524	BP:transmembrane transport;CC:integral component of membrane;MF:ATPase activity, coupled to transmembrane movement of substances;MF:ATPase activity;MF:ATP binding;	K05658	ABCB1, CD243	map02010	ABC transporters)	COG1132	V:Defense mechanisms)	sp|Q9LJX0|AB19B_ARATH;	ABC transporter B family member 19 OS=Arabidopsis thaliana OX=3702 GN=ABCB19 PE=1 SV=1;	PF00664;PF00005;PF02463;PF06414;PF13191;PF13401	ABC_membrane;ABC_tran;SMC_N;Zeta_toxin;AAA_16;AAA_22	ABC transporter transmembrane region;ABC transporter;RecF/RecN/SMC N terminal domain;Zeta toxin;AAA ATPase domain;AAA domain
TRINITY_DN52162_c0_g3	hypothetical protein F2Q69_00038571 [Brassica cretica])	42.27	20.53	28.11	48.3	24.78	52.04	30.3033	41.7067	GO:0055085;GO:0016021;GO:0016020;GO:0000325;GO:0005774;GO:0042626;GO:0016887;GO:0005524	BP:transmembrane transport;CC:integral component of membrane;CC:membrane;CC:plant-type vacuole;CC:vacuolar membrane;MF:ATPase activity, coupled to transmembrane movement of substances;MF:ATPase activity;MF:ATP binding;	K05665	ABCC1	map02010	ABC transporters)	COG1132	C:Energy production and conversion)	------	------	------	------	------
TRINITY_DN2988_c0_g1	multidrug resistance associated protein 1 [Pinus radiata])	33.62	25.81	31.38	29.29	30	28.06	30.27	29.1167	GO:0030007;GO:1901527;GO:0009651;GO:0016021;GO:0000325;GO:0005623;GO:0005774;GO:0042626;GO:0008281;GO:0016887;GO:0005524	BP:cellular potassium ion homeostasis;BP:abscisic acid-activated signaling pathway involved in stomatal movement;BP:response to salt stress;CC:integral component of membrane;CC:plant-type vacuole;CC:cell;CC:vacuolar membrane;MF:ATPase activity, coupled to transmembrane movement of substances;MF:sulfonylurea receptor activity;MF:ATPase activity;MF:ATP binding;	sind;K05665;pop	;ABCC1;	map02010	ABC transporters)	COG1132	V:Defense mechanisms)	sp|Q7GB25|AB5C_ARATH;	ABC transporter C family member 5 OS=Arabidopsis thaliana OX=3702 GN=ABCC5 PE=2 SV=2;	PF00664;PF00005;PF01926;PF13304;PF13555	ABC_membrane;ABC_tran;MMR_HSR1;AAA_21;AAA_29	ABC transporter transmembrane region;ABC transporter;50S ribosome-binding GTPase;AAA domain, putative AbiEii toxin, Type IV TA system;P-loop containing region of AAA domain
TRINITY_DN17435_c0_g1	DNA-directed RNA polymerases I, II, and III subunit RPABC1 [Salvia splendens])	32.06	28.87	29.4	33.09	29.6	30.44	30.11	31.0433	GO:0006351;GO:0005736;GO:0005666;GO:0005665;GO:0042025;GO:0003677;GO:0003899	BP:transcription, DNA-templated;CC:DNA-directed RNA polymerase I complex;CC:DNA-directed RNA polymerase III complex;CC:DNA-directed RNA polymerase II, core complex;CC:host cell nucleus;MF:DNA binding;MF:DNA-directed RNA polymerase activity;	K03013	RPB5, POLR2E	map03020	RNA polymerase)	COG2012	K:Transcription)	sp|O81098|RPB5A_ARATH;	DNA-directed RNA polymerases II and IV subunit 5A OS=Arabidopsis thaliana OX=3702 GN=NRPB5A PE=1 SV=1;	PF01191;PF03871	RNA_pol_Rpb5_C;RNA_pol_Rpb5_N	RNA polymerase Rpb5, C-terminal domain;RNA polymerase Rpb5, N-terminal domain
TRINITY_DN4333_c0_g1	serotransferrin [Amborella trichopoda])	35.78	32.72	21.47	32.2	38.32	45.55	29.99	38.69	------	------	K06569	MFI2, CD228	------	------	ENOG410XQ36	O:Posttranslational modification, protein turnover, chaperones)	sp|P79819|TRFE_ORYLA;	Serotransferrin OS=Oryzias latipes OX=8090 GN=tf PE=3 SV=1;	PF00405;PF12974	Transferrin;Phosphonate-bd	Transferrin;ABC transporter, phosphonate, periplasmic substrate-binding protein
TRINITY_DN3497_c0_g1	hypothetical protein MIMGU_mgv1a023358mg [Erythranthe guttata])	24.24	26.06	38.55	42.05	21.87	15.11	29.6167	26.3433	GO:0048544;GO:0016021;GO:0004674;GO:0030246;GO:0005524	BP:recognition of pollen;CC:integral component of membrane;MF:protein serine/threonine kinase activity;MF:carbohydrate binding;MF:ATP binding;	------	------	------	------	ENOG410YAJI	S:Function unknown)	sp|Q9FLV4|Y5248_ARATH;	G-type lectin S-receptor-like serine/threonine-protein kinase At5g24080 OS=Arabidopsis thaliana OX=3702 GN=At5g24080 PE=2 SV=1;	PF00069;PF07714;PF03109	Pkinase;PK_Tyr_Ser-Thr;ABC1	Protein kinase domain;Protein tyrosine and serine/threonine kinase;ABC1 family
TRINITY_DN4320_c0_g2	uncharacterized protein LOC111296321 isoform X1 [Durio zibethinus])	31.6	28.81	26.54	25.1	33.33	29.49	28.9833	29.3067	GO:0016021;GO:0005524;GO:0004672	CC:integral component of membrane;MF:ATP binding;MF:protein kinase activity;	K08869	ADCK, ABC1	------	------	COG0661	S:Function unknown)	sp|Q55680|Y005_SYNY3;	Uncharacterized protein sll0005 OS=Synechocystis sp.;	PF03109;PF01636;PF00069	ABC1;APH;Pkinase	ABC1 family;Phosphotransferase enzyme family;Protein kinase domain
TRINITY_DN555_c0_g1	multidrug resistance associated protein 2 [Pinus radiata])	29.26	29.09	28.14	35.77	26.83	29.74	28.83	30.78	GO:0000325;GO:0016021;GO:0005774;GO:0042626;GO:0005524;GO:0016887;GO:1902417	CC:plant-type vacuole;CC:integral component of membrane;CC:vacuolar membrane;MF:ATPase activity, coupled to transmembrane movement of substances;MF:ATP binding;MF:ATPase activity;MF:;	K05665	ABCC1	map02010	ABC transporters)	COG1132	O:Posttranslational modification, protein turnover, chaperones)	sp|Q42093|AB2C_ARATH;	ABC transporter C family member 2 OS=Arabidopsis thaliana OX=3702 GN=ABCC2 PE=1 SV=2;	PF00005;PF00664;PF02463;PF01926	ABC_tran;ABC_membrane;SMC_N;MMR_HSR1	ABC transporter;ABC transporter transmembrane region;RecF/RecN/SMC N terminal domain;50S ribosome-binding GTPase
TRINITY_DN8784_c0_g1	ABC transporter C family member 8 isoform X3 [Cucurbita moschata])	24.37	43.94	16.71	35.51	15.4	31.88	28.34	27.5967	------	------	------	------	------	------	------	------	------	------	------	------	------
TRINITY_DN8898_c0_g1	ABC transporter C family member 12-like isoform X1 [Rhodamnia argentea])	30.26	39.61	13.28	33.85	19.81	19.1	27.7167	24.2533	GO:0016021;GO:0042626;GO:0016887;GO:0005524	CC:integral component of membrane;MF:ATPase activity, coupled to transmembrane movement of substances;MF:ATPase activity;MF:ATP binding;	K05673;K05666	ABCC4;ABCC2	map02010	ABC transporters)	COG1132	V:Defense mechanisms)	sp|Q8ST87|ABCCA_DICDI;	ABC transporter C family member 10 OS=Dictyostelium discoideum OX=44689 GN=abcC10 PE=3 SV=1;	PF00005	ABC_tran	ABC transporter
TRINITY_DN4421_c0_g1	uncharacterized protein LOC100830737 [Brachypodium distachyon])	27.59	24.15	30.92	19.77	30.68	29.04	27.5533	26.4967	GO:0016021;GO:0009507;GO:0005524;GO:0004672	CC:integral component of membrane;CC:chloroplast;MF:ATP binding;MF:protein kinase activity;	K08869	ADCK, ABC1	------	------	COG0661	S:Function unknown)	sp|Q55680|Y005_SYNY3;	Uncharacterized protein sll0005 OS=Synechocystis sp.;	PF03109;PF01636;PF00069	ABC1;APH;Pkinase	ABC1 family;Phosphotransferase enzyme family;Protein kinase domain
TRINITY_DN32489_c1_g1	ABC transporter D family member 1 [Punica granatum])	26.39	30.82	25.37	29.16	28.65	27.35	27.5267	28.3867	GO:0015916;GO:0006744;GO:0010030;GO:0046861;GO:0016021;GO:0042626;GO:0005524;GO:0016887	BP:fatty-acyl-CoA transport;BP:ubiquinone biosynthetic process;BP:positive regulation of seed germination;CC:glyoxysomal membrane;CC:integral component of membrane;MF:ATPase activity, coupled to transmembrane movement of substances;MF:ATP binding;MF:ATPase activity;	------	------	------	------	COG4178	S:Function unknown)	sp|Q94FB9|AB1D_ARATH;	ABC transporter D family member 1 OS=Arabidopsis thaliana OX=3702 GN=ABCD1 PE=1 SV=1;	PF06472;PF00005;PF13555;PF13304;PF13476	ABC_membrane_2;ABC_tran;AAA_29;AAA_21;AAA_23	ABC transporter transmembrane region 2;ABC transporter;P-loop containing region of AAA domain;AAA domain, putative AbiEii toxin, Type IV TA system;AAA domain
TRINITY_DN44211_c0_g1	hypothetical protein 0_16607_01, partial [Pinus mugo])	36.73	28.84	15.74	29.39	43.72	52.13	27.1033	41.7467	GO:0055085;GO:0016021;GO:0016020;GO:0000325;GO:0005774;GO:0042626;GO:0016887;GO:0005524	BP:transmembrane transport;CC:integral component of membrane;CC:membrane;CC:plant-type vacuole;CC:vacuolar membrane;MF:ATPase activity, coupled to transmembrane movement of substances;MF:ATPase activity;MF:ATP binding;	K05665	ABCC1	map02010	ABC transporters)	COG1132	V:Defense mechanisms)	sp|Q8LGU1|AB8C_ARATH;	ABC transporter C family member 8 OS=Arabidopsis thaliana OX=3702 GN=ABCC8 PE=2 SV=3;	------	------	------
TRINITY_DN2547_c0_g1	ABC transporter C family member 14-like [Nymphaea colorata])	32.01	28.41	17.75	29.26	29.15	36.76	26.0567	31.7233	GO:0055085;GO:0016021;GO:0016020;GO:0000325;GO:0005774;GO:0042626;GO:0016887;GO:0005524	BP:transmembrane transport;CC:integral component of membrane;CC:membrane;CC:plant-type vacuole;CC:vacuolar membrane;MF:ATPase activity, coupled to transmembrane movement of substances;MF:ATPase activity;MF:ATP binding;	sind;K05666	;ABCC2	map02010	ABC transporters)	COG1132	V:Defense mechanisms)	sp|Q7DM58|AB4C_ARATH;	ABC transporter C family member 4 OS=Arabidopsis thaliana OX=3702 GN=ABCC4 PE=1 SV=2;	PF00005;PF00664;PF13555;PF00350	ABC_tran;ABC_membrane;AAA_29;Dynamin_N	ABC transporter;ABC transporter transmembrane region;P-loop containing region of AAA domain;Dynamin family
TRINITY_DN20362_c0_g1	PREDICTED: ABC transporter I family member 20 [Lupinus angustifolius])	26.9	25.24	25.95	23.45	22.36	26.57	26.03	24.1267	GO:0080167;GO:0016887;GO:0005524	BP:response to karrikin;MF:ATPase activity;MF:ATP binding;	K12608	CAF16	map03018	RNA degradation)	COG4586	S:Function unknown)	sp|Q9LZ98|AB20I_ARATH;	ABC transporter I family member 20 OS=Arabidopsis thaliana OX=3702 GN=ABCI20 PE=2 SV=1;	------	------	------
TRINITY_DN6204_c0_g1	protein ACTIVITY OF BC1 COMPLEX KINASE 1, chloroplastic-like [Panicum hallii])	26.34	24.26	26.55	26.83	23.73	20.41	25.7167	23.6567	GO:0015996;GO:1901562;GO:0006995;GO:0010114;GO:0010109;GO:0009637;GO:1904143;GO:1902171;GO:0080177;GO:0009414;GO:1902326;GO:0010027;GO:0031540;GO:0080183;GO:0009767;GO:0010287;GO:0004672;GO:0005524	BP:chlorophyll catabolic process;BP:response to paraquat;BP:cellular response to nitrogen starvation;BP:response to red light;BP:regulation of photosynthesis;BP:response to blue light;BP:positive regulation of carotenoid biosynthetic process;BP:regulation of tocopherol cyclase activity;BP:plastoglobule organization;BP:response to water deprivation;BP:positive regulation of chlorophyll biosyntheti…	------	------	------	------	COG0661	S:Function unknown)	sp|Q8RWG1|AB1K1_ARATH;	Protein ACTIVITY OF BC1 COMPLEX KINASE 1, chloroplastic OS=Arabidopsis thaliana OX=3702 GN=ABC1K1 PE=1 SV=1;	PF03109;PF01636;PF00069	ABC1;APH;Pkinase	ABC1 family;Phosphotransferase enzyme family;Protein kinase domain
TRINITY_DN1620_c0_g1	PREDICTED: pleiotropic drug resistance protein 2-like isoform X1 [Nelumbo nucifera])	30.41	26.63	18.88	41.35	25.12	45.9	25.3067	37.4567	GO:0055085;GO:0016021;GO:0005886;GO:0042626;GO:0016887;GO:0005524	BP:transmembrane transport;CC:integral component of membrane;CC:plasma membrane;MF:ATPase activity, coupled to transmembrane movement of substances;MF:ATPase activity;MF:ATP binding;	------	------	------	------	COG0842	V:Defense mechanisms)	sp|Q76CU2|PDR1_TOBAC;	Pleiotropic drug resistance protein 1 OS=Nicotiana tabacum OX=4097 GN=PDR1 PE=2 SV=1;	PF01061;PF00005;PF08370;PF19055;PF14510;PF13304;PF13481;PF13555	ABC2_membrane;ABC_tran;PDR_assoc;ABC2_membrane_7;ABC_trans_N;AAA_21;AAA_25;AAA_29	ABC-2 type transporter;ABC transporter;Plant PDR ABC transporter associated;ABC-2 type transporter;ABC-transporter N-terminal;AAA domain, putative AbiEii toxin, Type IV TA system;AAA domain;P-loop containing region of AAA domain
TRINITY_DN20789_c0_g1	ABC transporter C family member 8 like [Actinidia chinensis var. chinensis])	34.62	29.01	10.46	26.16	30.3	40.52	24.6967	32.3267	GO:0055085;GO:0016021;GO:0016020;GO:0000325;GO:0005774;GO:0042626;GO:0016887;GO:0005524	BP:transmembrane transport;CC:integral component of membrane;CC:membrane;CC:plant-type vacuole;CC:vacuolar membrane;MF:ATPase activity, coupled to transmembrane movement of substances;MF:ATPase activity;MF:ATP binding;	------	------	------	------	COG1132	V:Defense mechanisms)	sp|Q8LGU1|AB8C_ARATH;	ABC transporter C family member 8 OS=Arabidopsis thaliana OX=3702 GN=ABCC8 PE=2 SV=3;	PF00664	ABC_membrane	ABC transporter transmembrane region
TRINITY_DN4186_c0_g1	pleiotropic drug resistance protein 2 [Elaeis guineensis])	27.66	32.94	12.37	19.52	20.41	15.32	24.3233	18.4167	GO:0055085;GO:0016021;GO:0005886;GO:0042626;GO:0016887;GO:0005524	BP:transmembrane transport;CC:integral component of membrane;CC:plasma membrane;MF:ATPase activity, coupled to transmembrane movement of substances;MF:ATPase activity;MF:ATP binding;	------	------	------	------	COG0842;COG0465	V:Defense mechanisms);O:Posttranslational modification, protein turnover, chaperones)	sp|Q76CU2|PDR1_TOBAC;	Pleiotropic drug resistance protein 1 OS=Nicotiana tabacum OX=4097 GN=PDR1 PE=2 SV=1;	PF01061;PF00005;PF08370;PF19055;PF14510;PF13304;PF13481	ABC2_membrane;ABC_tran;PDR_assoc;ABC2_membrane_7;ABC_trans_N;AAA_21;AAA_25	ABC-2 type transporter;ABC transporter;Plant PDR ABC transporter associated;ABC-2 type transporter;ABC-transporter N-terminal;AAA domain, putative AbiEii toxin, Type IV TA system;AAA domain
TRINITY_DN31910_c0_g2	ABC transporter B family member 4 [Capsicum chinense])	30.95	24.77	16.73	37.55	36.93	36.07	24.15	36.85	GO:0015074;GO:0016021;GO:0042626;GO:0016887;GO:0008270;GO:0003676;GO:0005524	BP:DNA integration;CC:integral component of membrane;MF:ATPase activity, coupled to transmembrane movement of substances;MF:ATPase activity;MF:zinc ion binding;MF:nucleic acid binding;MF:ATP binding;	------	------	------	------	------	------	------	------	------	------	------
TRINITY_DN469_c0_g1	ABC transporter C family member 8-like [Asparagus officinalis])	24.79	20.76	26.73	27.06	20.75	23.95	24.0933	23.92	GO:0055085;GO:0016021;GO:0016020;GO:0000325;GO:0005774;GO:0042626;GO:0016887;GO:0005524	BP:transmembrane transport;CC:integral component of membrane;CC:membrane;CC:plant-type vacuole;CC:vacuolar membrane;MF:ATPase activity, coupled to transmembrane movement of substances;MF:ATPase activity;MF:ATP binding;	ppp;K05665	;ABCC1	map02010	ABC transporters)	COG1132	V:Defense mechanisms)	sp|Q8LGU1|AB8C_ARATH;	ABC transporter C family member 8 OS=Arabidopsis thaliana OX=3702 GN=ABCC8 PE=2 SV=3;	PF00005;PF00664;PF13555	ABC_tran;ABC_membrane;AAA_29	ABC transporter;ABC transporter transmembrane region;P-loop containing region of AAA domain
TRINITY_DN19038_c0_g3	unknown [Picea sitchensis])	25.08	21.44	23.65	21.92	21.39	22.42	23.39	21.91	GO:0009793;GO:0010027;GO:0009570;GO:0042626;GO:0016887;GO:0005524	BP:embryo development ending in seed dormancy;BP:thylakoid membrane organization;CC:chloroplast stroma;MF:ATPase activity, coupled to transmembrane movement of substances;MF:ATPase activity;MF:ATP binding;	K09013	sufC	------	------	COG0396	O:Posttranslational modification, protein turnover, chaperones)	sp|Q9CAF5|AB6I_ARATH;	ABC transporter I family member 6, chloroplastic OS=Arabidopsis thaliana OX=3702 GN=ABCI6 PE=1 SV=1;	PF00005;PF02463;PF13304	ABC_tran;SMC_N;AAA_21	ABC transporter;RecF/RecN/SMC N terminal domain;AAA domain, putative AbiEii toxin, Type IV TA system
TRINITY_DN7562_c0_g1	unknown [Picea sitchensis])	23.46	24.15	20.16	17.31	21.51	24.44	22.59	21.0867	GO:0005975;GO:0046177;GO:0046316;GO:0016301;GO:0005524	BP:carbohydrate metabolic process;BP:D-gluconate catabolic process;MF:gluconokinase activity;MF:kinase activity;MF:ATP binding;	K00851	E2.7.1.12, gntK, idnK	map00030	Pentose phosphate pathway)	COG3265	G:Carbohydrate transport and metabolism)	sp|Q9SLE0|GNTK_ARATH;	Gluconokinase OS=Arabidopsis thaliana OX=3702 GN=At2g16790 PE=2 SV=2;	PF01202;PF00005;PF13671;PF13238;PF02224	SKI;ABC_tran;AAA_33;AAA_18;Cytidylate_kin	Shikimate kinase;ABC transporter;AAA domain;AAA domain;Cytidylate kinase
TRINITY_DN19910_c0_g1	ABC transporter F family member 5 [Vitis vinifera])	19.02	18.96	28.67	18.69	16.77	22.33	22.2167	19.2633	GO:0016887;GO:0005524	MF:ATPase activity;MF:ATP binding;	------	------	------	------	COG0488	S:Function unknown)	sp|Q9LV93|AB5F_ARATH;	ABC transporter F family member 5 OS=Arabidopsis thaliana OX=3702 GN=ABCF5 PE=2 SV=1;	PF00005;PF12848;PF13304;PF02463;PF13555;PF13401	ABC_tran;ABC_tran_Xtn;AAA_21;SMC_N;AAA_29;AAA_22	ABC transporter;ABC transporter;AAA domain, putative AbiEii toxin, Type IV TA system;RecF/RecN/SMC N terminal domain;P-loop containing region of AAA domain;AAA domain
TRINITY_DN3501_c0_g2	PREDICTED: ABC transporter B family member 26, chloroplastic [Raphanus sativus])	22.07	15.82	27.88	22.03	17.66	21.21	21.9233	20.3	GO:0031969;GO:0009941;GO:0016021;GO:0005739;GO:0009507;GO:0042626;GO:0016887;GO:0005524	CC:chloroplast membrane;CC:chloroplast envelope;CC:integral component of membrane;CC:mitochondrion;CC:chloroplast;MF:ATPase activity, coupled to transmembrane movement of substances;MF:ATPase activity;MF:ATP binding;	K05656	ABCB9, TAPL	map02010	ABC transporters)	COG1132	V:Defense mechanisms)	sp|Q8RY46|AB26B_ARATH;	ABC transporter B family member 26, chloroplastic OS=Arabidopsis thaliana OX=3702 GN=ABCB26 PE=1 SV=1;	PF00005	ABC_tran	ABC transporter
TRINITY_DN12768_c0_g1	ABC transporter I family member 10-like [Prosopis alba])	21.41	27.26	15.14	13.88	16.53	17.52	21.27	15.9767	GO:0009658;GO:0055076;GO:0009941;GO:0009706;GO:0016887;GO:0005524	BP:chloroplast organization;BP:transition metal ion homeostasis;CC:chloroplast envelope;CC:chloroplast inner membrane;MF:ATPase activity;MF:ATP binding;	------	------	------	------	COG1122	P:Inorganic ion transport and metabolism)	sp|Q8H1R4|AB10I_ARATH;	ABC transporter I family member 10 OS=Arabidopsis thaliana OX=3702 GN=ABCI10 PE=2 SV=1;	PF00005;PF13304;PF02463;PF13555;PF00004	ABC_tran;AAA_21;SMC_N;AAA_29;AAA	ABC transporter;AAA domain, putative AbiEii toxin, Type IV TA system;RecF/RecN/SMC N terminal domain;P-loop containing region of AAA domain;ATPase family associated with various cellular activities (AAA)
TRINITY_DN2613_c0_g1	ABC transporter B family member 19-like [Vitis riparia])	14.03	29.73	19.46	20.59	20.15	10.96	21.0733	17.2333	GO:0055085;GO:0016021;GO:0042626;GO:0016887;GO:0005524	BP:transmembrane transport;CC:integral component of membrane;MF:ATPase activity, coupled to transmembrane movement of substances;MF:ATPase activity;MF:ATP binding;	K05658	ABCB1, CD243	map02010	ABC transporters)	COG1132	V:Defense mechanisms)	sp|Q9LJX0|AB19B_ARATH;	ABC transporter B family member 19 OS=Arabidopsis thaliana OX=3702 GN=ABCB19 PE=1 SV=1;	PF00664;PF00005	ABC_membrane;ABC_tran	ABC transporter transmembrane region;ABC transporter
TRINITY_DN723_c0_g1	PREDICTED: ABC transporter I family member 19 [Camelina sativa])	22.34	19.7	20.89	18.43	20.82	23.51	20.9767	20.92	GO:0005737;GO:0016787;GO:0016887;GO:0005524	CC:cytoplasm;MF:hydrolase activity;MF:ATPase activity;MF:ATP binding;	K12608	CAF16	map03018	RNA degradation)	COG4586	S:Function unknown)	sp|Q3EDJ0|AB19I_ARATH;	ABC transporter I family member 19 OS=Arabidopsis thaliana OX=3702 GN=ABCI19 PE=2 SV=1;	PF13304;PF00005	AAA_21;ABC_tran	AAA domain, putative AbiEii toxin, Type IV TA system;ABC transporter
TRINITY_DN9151_c0_g1	PREDICTED: pleiotropic drug resistance protein 2-like [Nelumbo nucifera])	24.97	20.57	16.24	29.51	30.28	55.4	20.5933	38.3967	GO:0055085;GO:0016021;GO:0005886;GO:0042626;GO:0016887;GO:0005524;GO:0015407	BP:transmembrane transport;CC:integral component of membrane;CC:plasma membrane;MF:ATPase activity, coupled to transmembrane movement of substances;MF:ATPase activity;MF:ATP binding;MF:monosaccharide-transporting ATPase activity;	------	------	------	------	COG0842	V:Defense mechanisms)	sp|Q8GU86|AB43G_ORYSJ;	ABC transporter G family member 43 OS=Oryza sativa subsp. japonica OX=39947 GN=ABCG43 PE=2 SV=2;	------	------	------
TRINITY_DN9886_c0_g3	ABC transporter C family member 12-like isoform X6 [Cicer arietinum])	15.5	24.32	21.26	17.93	37.41	16.26	20.36	23.8667	GO:0055085;GO:0016021;GO:0016020;GO:0000325;GO:0005774;GO:0042626;GO:0016887;GO:0005524	BP:transmembrane transport;CC:integral component of membrane;CC:membrane;CC:plant-type vacuole;CC:vacuolar membrane;MF:ATPase activity, coupled to transmembrane movement of substances;MF:ATPase activity;MF:ATP binding;	K05674;K05673;K05665;K05666	ABCC10;ABCC4;ABCC1;ABCC2	map02010	ABC transporters)	COG1132	V:Defense mechanisms)	sp|Q28689|MRP2_RABIT;	Canalicular multispecific organic anion transporter 1 OS=Oryctolagus cuniculus OX=9986 GN=ABCC2 PE=1 SV=1;	PF00664	ABC_membrane	ABC transporter transmembrane region
TRINITY_DN4698_c0_g1	ABC transporter C family member 14-like [Hevea brasiliensis])	20.72	24.96	15.33	24.88	23.28	21.43	20.3367	23.1967	GO:0016021;GO:0042626;GO:0016887;GO:0005524	CC:integral component of membrane;MF:ATPase activity, coupled to transmembrane movement of substances;MF:ATPase activity;MF:ATP binding;	sind;K05666	;ABCC2	map02010	ABC transporters)	COG1132	V:Defense mechanisms)	sp|Q9LZJ5|AB14C_ARATH;	ABC transporter C family member 14 OS=Arabidopsis thaliana OX=3702 GN=ABCC14 PE=1 SV=1;	PF00664;PF00005;PF01926;PF01935	ABC_membrane;ABC_tran;MMR_HSR1;DUF87	ABC transporter transmembrane region;ABC transporter;50S ribosome-binding GTPase;Helicase HerA, central domain
TRINITY_DN6622_c0_g1	uncharacterized protein LOC103713116 isoform X1 [Phoenix dactylifera])	19.32	19.18	21.21	38.52	20.49	38.37	19.9033	32.46	GO:0005794;GO:0005783;GO:0005886;GO:0016787;GO:0016301;GO:0008270	CC:Golgi apparatus;CC:endoplasmic reticulum;CC:plasma membrane;MF:hydrolase activity;MF:kinase activity;MF:zinc ion binding;	K08869	ADCK, ABC1	------	------	COG0661	S:Function unknown)	sp|Q93Y08|AB1K8_ARATH;	Protein ACTIVITY OF BC1 COMPLEX KINASE 8, chloroplastic OS=Arabidopsis thaliana OX=3702 GN=ABC1K8 PE=2 SV=1;	PF03109	ABC1	ABC1 family
TRINITY_DN14128_c0_g1		0	59	0	0	0	0	19.6667	0	------	------	------	------	------	------	------	------	------	------	PF00005;PF13671;PF03193	ABC_tran;AAA_33;RsgA_GTPase	ABC transporter;AAA domain;RsgA GTPase
TRINITY_DN9886_c0_g2	ABC transporter C family member 12-like isoform X1 [Citrus sinensis])	12.24	23.39	23.19	13.71	29.13	14.7	19.6067	19.18	GO:0055085;GO:0016021;GO:0016020;GO:0000325;GO:0005774;GO:0042626;GO:0016887;GO:0005524	BP:transmembrane transport;CC:integral component of membrane;CC:membrane;CC:plant-type vacuole;CC:vacuolar membrane;MF:ATPase activity, coupled to transmembrane movement of substances;MF:ATPase activity;MF:ATP binding;	K05673	ABCC4	map02010	ABC transporters)	COG1132	V:Defense mechanisms)	sp|O15439|MRP4_HUMAN;	Multidrug resistance-associated protein 4 OS=Homo sapiens OX=9606 GN=ABCC4 PE=1 SV=3;	PF00664	ABC_membrane	ABC transporter transmembrane region
TRINITY_DN4400_c0_g1	ATP-binding cassette containing protein [Parasponia andersonii])	22.61	18.99	16.54	19.87	19.03	19.59	19.38	19.4967	GO:0055085;GO:0016021;GO:0016020;GO:0000325;GO:0005774;GO:0042626;GO:0016887;GO:0005524	BP:transmembrane transport;CC:integral component of membrane;CC:membrane;CC:plant-type vacuole;CC:vacuolar membrane;MF:ATPase activity, coupled to transmembrane movement of substances;MF:ATPase activity;MF:ATP binding;	K05666	ABCC2	map02010	ABC transporters)	COG1132	V:Defense mechanisms)	sp|Q9LZJ5|AB14C_ARATH;	ABC transporter C family member 14 OS=Arabidopsis thaliana OX=3702 GN=ABCC14 PE=1 SV=1;	PF00664;PF00005;PF01935	ABC_membrane;ABC_tran;DUF87	ABC transporter transmembrane region;ABC transporter;Helicase HerA, central domain
TRINITY_DN2465_c0_g1	hypothetical protein AQUCO_11000043v1 [Aquilegia coerulea])	19.56	19.02	17.87	15.7	19.59	14.43	18.8167	16.5733	GO:0016021;GO:0042626;GO:0016887;GO:0005524	CC:integral component of membrane;MF:ATPase activity, coupled to transmembrane movement of substances;MF:ATPase activity;MF:ATP binding;	psom;K05665;K05666	;ABCC1;ABCC2	map02010	ABC transporters)	COG1132	V:Defense mechanisms)	sp|Q9M1C7|AB9C_ARATH;	ABC transporter C family member 9 OS=Arabidopsis thaliana OX=3702 GN=ABCC9 PE=2 SV=2;	PF00005;PF00664;PF13555;PF01926	ABC_tran;ABC_membrane;AAA_29;MMR_HSR1	ABC transporter;ABC transporter transmembrane region;P-loop containing region of AAA domain;50S ribosome-binding GTPase
TRINITY_DN2454_c0_g1	unknown [Picea sitchensis])	20.93	14.38	20.96	17.02	16.94	20.38	18.7567	18.1133	GO:0016021;GO:0016887;GO:0005524	CC:integral component of membrane;MF:ATPase activity;MF:ATP binding;	------	------	------	------	COG1131	S:Function unknown)	sp|Q9ZU35|AB7G_ARATH;	ABC transporter G family member 7 OS=Arabidopsis thaliana OX=3702 GN=ABCG7 PE=2 SV=1;	PF01061	ABC2_membrane	ABC-2 type transporter
TRINITY_DN2928_c0_g1	PREDICTED: ABC transporter B family member 25, mitochondrial [Nelumbo nucifera])	21.42	19.57	15.19	15.34	20.55	21.28	18.7267	19.0567	GO:0006879;GO:0055085;GO:0016021;GO:0005623;GO:0005743;GO:0042626;GO:0016887;GO:0005524	BP:cellular iron ion homeostasis;BP:transmembrane transport;CC:integral component of membrane;CC:cell;CC:mitochondrial inner membrane;MF:ATPase activity, coupled to transmembrane movement of substances;MF:ATPase activity;MF:ATP binding;	K05663	ATM	map02010	ABC transporters)	COG5265	V:Defense mechanisms)	sp|Q9LVM1|AB25B_ARATH;	ABC transporter B family member 25, mitochondrial OS=Arabidopsis thaliana OX=3702 GN=ABCB25 PE=1 SV=1;	PF00664;PF00005	ABC_membrane;ABC_tran	ABC transporter transmembrane region;ABC transporter
TRINITY_DN33642_c0_g1	ATP-binding cassette containing protein [Parasponia andersonii])	25.05	19.49	11.05	20.05	18	22.01	18.53	20.02	GO:0055085;GO:0016021;GO:0016020;GO:0000325;GO:0005774;GO:0042626;GO:0016887;GO:0005524	BP:transmembrane transport;CC:integral component of membrane;CC:membrane;CC:plant-type vacuole;CC:vacuolar membrane;MF:ATPase activity, coupled to transmembrane movement of substances;MF:ATPase activity;MF:ATP binding;	------	------	------	------	COG1132	V:Defense mechanisms)	sp|Q8LGU1|AB8C_ARATH;	ABC transporter C family member 8 OS=Arabidopsis thaliana OX=3702 GN=ABCC8 PE=2 SV=3;	------	------	------
TRINITY_DN2465_c0_g2	hypothetical protein FNV43_RR03777 [Rhamnella rubrinervis])	17.05	23.82	14.03	21.1	15.04	15.87	18.3	17.3367	GO:0055085;GO:0016021;GO:0016020;GO:0000325;GO:0005774;GO:0042626;GO:0016887;GO:0005524	BP:transmembrane transport;CC:integral component of membrane;CC:membrane;CC:plant-type vacuole;CC:vacuolar membrane;MF:ATPase activity, coupled to transmembrane movement of substances;MF:ATPase activity;MF:ATP binding;	K05665	ABCC1	map02010	ABC transporters)	COG1132	V:Defense mechanisms)	sp|Q7GB25|AB5C_ARATH;	ABC transporter C family member 5 OS=Arabidopsis thaliana OX=3702 GN=ABCC5 PE=2 SV=2;	PF00005;PF00664;PF02463;PF01935	ABC_tran;ABC_membrane;SMC_N;DUF87	ABC transporter;ABC transporter transmembrane region;RecF/RecN/SMC N terminal domain;Helicase HerA, central domain
TRINITY_DN14864_c0_g1	hypothetical protein CMV_010509 [Castanea mollissima])	16.23	21.14	16.45	19.59	16.88	17.15	17.94	17.8733	GO:0016829;GO:0016887;GO:0005524	MF:lyase activity;MF:ATPase activity;MF:ATP binding;	------	------	------	------	COG1127	Q:Secondary metabolites biosynthesis, transport and catabolism)	sp|Q9AT00|TGD3_ARATH;	Protein TRIGALACTOSYLDIACYLGLYCEROL 3, chloroplastic OS=Arabidopsis thaliana OX=3702 GN=TGD3 PE=1 SV=1;	PF00005;PF13555	ABC_tran;AAA_29	ABC transporter;P-loop containing region of AAA domain
TRINITY_DN5154_c0_g1	hypothetical protein C5167_016599 [Papaver somniferum])	19.61	18.55	15.33	19.3	15.59	17.85	17.83	17.58	GO:0016021;GO:0009507	CC:integral component of membrane;CC:chloroplast;	------	------	------	------	COG0619	P:Inorganic ion transport and metabolism)	sp|Q944H2|AB12I_ARATH;	Protein ABCI12, chloroplastic OS=Arabidopsis thaliana OX=3702 GN=ABCI12 PE=1 SV=1;	PF02361	CbiQ	Cobalt transport protein
TRINITY_DN11100_c0_g1	Transporter, ABC superfamily (Breast cancer resistance protein) [Handroanthus impetiginosus])	17.07	26.03	9.99	20.01	20.81	0.15	17.6967	13.6567	GO:0055085;GO:0016021;GO:0005886;GO:0042626;GO:0016887;GO:0005524	BP:transmembrane transport;CC:integral component of membrane;CC:plasma membrane;MF:ATPase activity, coupled to transmembrane movement of substances;MF:ATPase activity;MF:ATP binding;	------	------	------	------	COG1131	U:Intracellular trafficking, secretion, and vesicular transport)	sp|A0A0M3R8G1|STR1_PETHY;	ABC transporter G family member STR OS=Petunia hybrida OX=4102 GN=STR PE=2 SV=1;	PF01061;PF19055;PF00005;PF12698	ABC2_membrane;ABC2_membrane_7;ABC_tran;ABC2_membrane_3	ABC-2 type transporter;ABC-2 type transporter;ABC transporter;ABC-2 family transporter protein
TRINITY_DN23363_c0_g1	ABC transporter C family member 8 [Camellia sinensis])	10.46	21.79	18.71	20.1	15.05	15.88	16.9867	17.01	GO:0016021;GO:0042626;GO:0016887;GO:0005524	CC:integral component of membrane;MF:ATPase activity, coupled to transmembrane movement of substances;MF:ATPase activity;MF:ATP binding;	------	------	------	------	COG1132	V:Defense mechanisms)	sp|Q8LGU1|AB8C_ARATH;	ABC transporter C family member 8 OS=Arabidopsis thaliana OX=3702 GN=ABCC8 PE=2 SV=3;	------	------	------
TRINITY_DN12864_c1_g1	ABC transporter C family member 8-like isoform X2 [Quercus lobata])	14.84	19.37	15.48	27.13	15.52	10.48	16.5633	17.71	GO:0016021;GO:0042626;GO:0016887;GO:0005524	CC:integral component of membrane;MF:ATPase activity, coupled to transmembrane movement of substances;MF:ATPase activity;MF:ATP binding;	------	------	------	------	COG1132	V:Defense mechanisms)	sp|Q8LGU1|AB8C_ARATH;	ABC transporter C family member 8 OS=Arabidopsis thaliana OX=3702 GN=ABCC8 PE=2 SV=3;	PF00664	ABC_membrane	ABC transporter transmembrane region
TRINITY_DN1617_c0_g1	hypothetical protein TEA_026999 [Camellia sinensis var. sinensis])	16.9	22.33	10.09	14.88	19.75	7.06	16.44	13.8967	GO:0016021;GO:0016887;GO:0005524	CC:integral component of membrane;MF:ATPase activity;MF:ATP binding;	------	------	------	------	COG1131	V:Defense mechanisms)	sp|A3BXL8|AB53G_ORYSJ;	ABC transporter G family member 53 OS=Oryza sativa subsp. japonica OX=39947 GN=ABCG53 PE=2 SV=1;	PF01061;PF00005;PF12698	ABC2_membrane;ABC_tran;ABC2_membrane_3	ABC-2 type transporter;ABC transporter;ABC-2 family transporter protein
TRINITY_DN14677_c0_g1	hypothetical protein G4B88_025440, partial [Cannabis sativa])	20.38	23.01	5.72	21.8	3.88	22.28	16.37	15.9867	GO:0016021;GO:0042626;GO:0016887;GO:0005524	CC:integral component of membrane;MF:ATPase activity, coupled to transmembrane movement of substances;MF:ATPase activity;MF:ATP binding;	K05673;K05666	ABCC4;ABCC2	map02010	ABC transporters)	COG1132	V:Defense mechanisms)	sp|A0A0D1CZ63|FER6_USTMA;	Multidrug resistance protein fer6 OS=Ustilago maydis;	PF00664	ABC_membrane	ABC transporter transmembrane region
TRINITY_DN8836_c0_g1		13.53	16.65	17.97	14.7	11.86	9.77	16.05	12.11	------	------	K22754	RNF213	------	------	ENOG410XTAN	S:Function unknown)	sp|A0A0R4IBK5|R213A_DANRE;	E3 ubiquitin-protein ligase rnf213-alpha OS=Danio rerio OX=7955 GN=rnf213a PE=3 SV=1;	PF00004;PF00005;PF12775;PF07728;PF13173	AAA;ABC_tran;AAA_7;AAA_5;AAA_14	ATPase family associated with various cellular activities (AAA);ABC transporter;P-loop containing dynein motor region;AAA domain (dynein-related subfamily);AAA domain
TRINITY_DN3326_c0_g1	LOW QUALITY PROTEIN: protein SMG9-like [Nymphaea colorata])	16.99	14.26	16.79	16.66	17.24	17.07	16.0133	16.99	GO:0000184	BP:nuclear-transcribed mRNA catabolic process, nonsense-mediated decay;	K18735	SMG9	------	------	ENOG410XSTF	S:Function unknown)	sp|Q05AW9|SMG9_XENLA;	Protein SMG9 OS=Xenopus laevis OX=8355 GN=smg9 PE=2 SV=1;	PF00005;PF03193	ABC_tran;RsgA_GTPase	ABC transporter;RsgA GTPase
TRINITY_DN12857_c0_g1	hypothetical protein CDL12_19384 [Handroanthus impetiginosus])	17.57	17.54	11.9	9.8	12.25	21.61	15.67	14.5533	GO:0010044;GO:0016021;GO:0005887	BP:response to aluminum ion;CC:integral component of membrane;CC:integral component of plasma membrane;	K02069	ABC.X2.P	------	------	COG0390	S:Function unknown)	sp|Q9ZUT3|ALS3_ARATH;	Protein ALUMINUM SENSITIVE 3 OS=Arabidopsis thaliana OX=3702 GN=ALS3 PE=1 SV=1;	PF03649	UPF0014	Uncharacterised protein family (UPF0014)
TRINITY_DN18904_c0_g2	putative ABC1 protein At2g40090 isoform X1 [Vitis riparia])	14.64	17.46	13.47	14.55	15.62	13.33	15.19	14.5	GO:0005524;GO:0004672	MF:ATP binding;MF:protein kinase activity;	K08869	ADCK, ABC1	------	------	COG0661	S:Function unknown)	sp|O04212|Y2090_ARATH;	Putative ABC1 protein At2g40090 OS=Arabidopsis thaliana OX=3702 GN=At2g40090 PE=2 SV=2;	PF03109	ABC1	ABC1 family
TRINITY_DN13772_c0_g1	ABC transporter C family member 13 isoform X1 [Cajanus cajan])	16.12	11.75	16.95	13.47	17.83	20.85	14.94	17.3833	GO:0055085;GO:0016021;GO:0016020;GO:0042626;GO:0016887;GO:0005524	BP:transmembrane transport;CC:integral component of membrane;CC:membrane;MF:ATPase activity, coupled to transmembrane movement of substances;MF:ATPase activity;MF:ATP binding;	K05674	ABCC10	map02010	ABC transporters)	COG1132	S:Function unknown)	sp|Q9SKX0|AB13C_ARATH;	ABC transporter C family member 13 OS=Arabidopsis thaliana OX=3702 GN=ABCC13 PE=2 SV=3;	PF00664;PF00005	ABC_membrane;ABC_tran	ABC transporter transmembrane region;ABC transporter
TRINITY_DN3501_c0_g1	ABC transporter B family member 26, chloroplastic isoform X1 [Vitis riparia])	14.43	13.19	16.61	15.25	13.36	14.25	14.7433	14.2867	GO:0009941;GO:0016021;GO:0042626;GO:0016887;GO:0005524	CC:chloroplast envelope;CC:integral component of membrane;MF:ATPase activity, coupled to transmembrane movement of substances;MF:ATPase activity;MF:ATP binding;	K05656	ABCB9, TAPL	map02010	ABC transporters)	COG1132	V:Defense mechanisms)	sp|Q8RY46|AB26B_ARATH;	ABC transporter B family member 26, chloroplastic OS=Arabidopsis thaliana OX=3702 GN=ABCB26 PE=1 SV=1;	PF00664	ABC_membrane	ABC transporter transmembrane region
TRINITY_DN48718_c0_g1	uncharacterized protein LOC110031832 [Phalaenopsis equestris])	14.77	14.51	14.68	12.33	13.37	15.88	14.6533	13.86	GO:0005524;GO:0004672	MF:ATP binding;MF:protein kinase activity;	K08869	ADCK, ABC1	------	------	COG0661	S:Function unknown)	sp|P73577|Y889_SYNY3;	Uncharacterized protein slr0889 OS=Synechocystis sp.;	------	------	------
TRINITY_DN7807_c0_g1	hypothetical protein AMTR_s00010p00246080 [Amborella trichopoda])	17.95	13.1	12.23	11.91	13.61	11.32	14.4267	12.28	GO:0010287;GO:0005524;GO:0004672	CC:plastoglobule;MF:ATP binding;MF:protein kinase activity;	K08869	ADCK, ABC1	------	------	COG0661	S:Function unknown)	sp|Q94BU1|Y1181_ARATH;	Uncharacterized aarF domain-containing protein kinase At1g71810, chloroplastic OS=Arabidopsis thaliana OX=3702 GN=At1g71810 PE=1 SV=1;	PF03109	ABC1	ABC1 family
TRINITY_DN3721_c0_g1	uncharacterized aarF domain-containing protein kinase At1g79600, chloroplastic [Amborella trichopoda])	12.35	14.12	16.71	12.16	11.95	13.83	14.3933	12.6467	GO:0005524;GO:0004672	MF:ATP binding;MF:protein kinase activity;	K08869	ADCK, ABC1	------	------	COG0661	K:Transcription)	sp|Q9MA15|AB1K3_ARATH;	Protein ACTIVITY OF BC1 COMPLEX KINASE 3, chloroplastic OS=Arabidopsis thaliana OX=3702 GN=ABC1K3 PE=1 SV=1;	PF03109;PF00069;PF01636	ABC1;Pkinase;APH	ABC1 family;Protein kinase domain;Phosphotransferase enzyme family
TRINITY_DN7824_c0_g1	unknown [Picea sitchensis])	14.16	12.86	16.15	12.84	14.84	21.79	14.39	16.49	GO:0046467;GO:0055072;GO:1901031;GO:0016021;GO:0004672	BP:membrane lipid biosynthetic process;BP:iron ion homeostasis;BP:regulation of response to reactive oxygen species;CC:integral component of membrane;MF:protein kinase activity;	------	------	------	------	COG0661	S:Function unknown)	sp|B9DGY1|AB1K7_ARATH;	Protein ACTIVITY OF BC1 COMPLEX KINASE 7, chloroplastic OS=Arabidopsis thaliana OX=3702 GN=ABC1K7 PE=1 SV=1;	------	------	------
TRINITY_DN26370_c0_g2	hypothetical protein TanjilG_14261 [Lupinus angustifolius])	9.91	14.9	17.91	15.83	30.92	12.55	14.24	19.7667	GO:0016021;GO:0042626;GO:0016887;GO:0005524	CC:integral component of membrane;MF:ATPase activity, coupled to transmembrane movement of substances;MF:ATPase activity;MF:ATP binding;	K05673;K05666	ABCC4;ABCC2	map02010	ABC transporters)	COG1132	V:Defense mechanisms)	sp|Q96J66|ABCCB_HUMAN;	ATP-binding cassette sub-family C member 11 OS=Homo sapiens OX=9606 GN=ABCC11 PE=1 SV=1;	PF00005;PF02463	ABC_tran;SMC_N	ABC transporter;RecF/RecN/SMC N terminal domain
TRINITY_DN3852_c0_g1	hypothetical protein DKX38_028600 [Salix brachista])	15.86	14.17	11.49	14.27	14.13	8.45	13.84	12.2833	GO:0035435;GO:0010044;GO:0012506;GO:0016020;GO:0005315;GO:0005460;GO:0016887;GO:0005524	BP:phosphate ion transmembrane transport;BP:response to aluminum ion;CC:vesicle membrane;CC:membrane;MF:inorganic phosphate transmembrane transporter activity;MF:UDP-glucose transmembrane transporter activity;MF:ATPase activity;MF:ATP binding;	------	------	------	------	COG1117	P:Inorganic ion transport and metabolism)	sp|Q0D9V6|STAR1_ORYSJ;	Protein STAR1 OS=Oryza sativa subsp. japonica OX=39947 GN=STAR1 PE=1 SV=1;	PF00005;PF13304	ABC_tran;AAA_21	ABC transporter;AAA domain, putative AbiEii toxin, Type IV TA system
TRINITY_DN2784_c1_g1	hypothetical protein Saspl_008520 [Salvia splendens])	8.18	18.6	14.31	30.64	13.25	23.08	13.6967	22.3233	GO:0016021;GO:0042626;GO:0016887;GO:0005524	CC:integral component of membrane;MF:ATPase activity, coupled to transmembrane movement of substances;MF:ATPase activity;MF:ATP binding;	K05666	ABCC2	map02010	ABC transporters)	COG1132	V:Defense mechanisms)	sp|Q8LGU1|AB8C_ARATH;	ABC transporter C family member 8 OS=Arabidopsis thaliana OX=3702 GN=ABCC8 PE=2 SV=3;	------	------	------
TRINITY_DN4574_c1_g1	unnamed protein product [Coffea canephora])	13.67	16.86	10.49	13.31	16.38	14.67	13.6733	14.7867	GO:0016021;GO:0004674;GO:0005524;GO:0004672	CC:integral component of membrane;MF:protein serine/threonine kinase activity;MF:ATP binding;MF:protein kinase activity;	------	------	------	------	COG0515	T:Signal transduction mechanisms)	sp|C0LGW2|PAM74_ARATH;	Probable LRR receptor-like serine/threonine-protein kinase PAM74 OS=Arabidopsis thaliana OX=3702 GN=PAM74 PE=1 SV=1;	PF12819;PF07714;PF00069;PF13855;PF12799;PF11721;PF03109	Malectin_like;PK_Tyr_Ser-Thr;Pkinase;LRR_8;LRR_4;Malectin;ABC1	Malectin-like domain;Protein tyrosine and serine/threonine kinase;Protein kinase domain;Leucine rich repeat;Leucine Rich repeats (2 copies);Malectin domain;ABC1 family
TRINITY_DN10155_c0_g1	PREDICTED: ABC transporter C family member 8-like [Vigna angularis])	17.9	13.01	10	14.96	12.16	20.97	13.6367	16.03	GO:0055085;GO:0016021;GO:0016020;GO:0000325;GO:0005774;GO:0042626;GO:0016887;GO:0005524	BP:transmembrane transport;CC:integral component of membrane;CC:membrane;CC:plant-type vacuole;CC:vacuolar membrane;MF:ATPase activity, coupled to transmembrane movement of substances;MF:ATPase activity;MF:ATP binding;	------	------	------	------	COG1132	V:Defense mechanisms)	sp|Q7FB56|AB15C_ARATH;	Putative ABC transporter C family member 15 OS=Arabidopsis thaliana OX=3702 GN=ABCC15 PE=5 SV=2;	PF00005	ABC_tran	ABC transporter
TRINITY_DN20927_c1_g1	1,4-dihydroxy-2-naphthoate polyprenyltransferase, chloroplastic, partial [Morella rubra])	12.01	13.12	15.77	12.34	16.12	11.32	13.6333	13.26	GO:0042372;GO:0032194;GO:0042371;GO:0009772;GO:0010236;GO:0016021;GO:0009507;GO:0004659	BP:phylloquinone biosynthetic process;BP:ubiquinone biosynthetic process via 3,4-dihydroxy-5-polyprenylbenzoate;BP:vitamin K biosynthetic process;BP:photosynthetic electron transport in photosystem II;BP:plastoquinone biosynthetic process;CC:integral component of membrane;CC:chloroplast;MF:prenyltransferase activity;	K23094	ABC4, menA	map00130	Ubiquinone and other terpenoid-quinone biosynthesis)	COG1575	H:Coenzyme transport and metabolism)	sp|Q0WUA3|MENA_ARATH;	2-carboxy-1,4-naphthoquinone phytyltransferase, chloroplastic OS=Arabidopsis thaliana OX=3702 GN=ABC4 PE=1 SV=2;	------	------	------
TRINITY_DN9998_c0_g1	hypothetical protein CDL15_Pgr026882 [Punica granatum])	15.84	14.04	10.83	13.73	12.84	16.53	13.57	14.3667	GO:0055085;GO:0016021;GO:0005886;GO:0042626;GO:0016887;GO:0005524	BP:transmembrane transport;CC:integral component of membrane;CC:plasma membrane;MF:ATPase activity, coupled to transmembrane movement of substances;MF:ATPase activity;MF:ATP binding;	------	------	------	------	COG1131	V:Defense mechanisms)	sp|Q9FF46|AB28G_ARATH;	ABC transporter G family member 28 OS=Arabidopsis thaliana OX=3702 GN=ABCG28 PE=3 SV=1;	PF19055;PF00005;PF01061;PF03193	ABC2_membrane_7;ABC_tran;ABC2_membrane;RsgA_GTPase	ABC-2 type transporter;ABC transporter;ABC-2 type transporter;RsgA GTPase
TRINITY_DN44279_c0_g1	non-intrinsic ABC protein 14 [Artemisia annua])	14.84	9.94	15.89	10.92	15.63	19.55	13.5567	15.3667	GO:0016887;GO:0005524	MF:ATPase activity;MF:ATP binding;	------	------	------	------	COG1122	P:Inorganic ion transport and metabolism)	sp|Q8LEF6|AB11I_ARATH;	ABC transporter I family member 11, chloroplastic OS=Arabidopsis thaliana OX=3702 GN=ABCI11 PE=2 SV=1;	PF00005;PF13304;PF02463	ABC_tran;AAA_21;SMC_N	ABC transporter;AAA domain, putative AbiEii toxin, Type IV TA system;RecF/RecN/SMC N terminal domain
TRINITY_DN53757_c0_g1	ABC transporter G family member 11 [Morella rubra])	19.19	5.68	15.05	12.14	24.48	14.15	13.3067	16.9233	GO:0055085;GO:0016021;GO:0005886;GO:0042626;GO:0016887;GO:0005524	BP:transmembrane transport;CC:integral component of membrane;CC:plasma membrane;MF:ATPase activity, coupled to transmembrane movement of substances;MF:ATPase activity;MF:ATP binding;	------	------	------	------	COG1131	V:Defense mechanisms)	sp|Q8RWI9|AB15G_ARATH;	ABC transporter G family member 15 OS=Arabidopsis thaliana OX=3702 GN=ABCG15 PE=2 SV=2;	PF00005;PF03193;PF13191;PF02224;PF13555;PF03215;PF01926;PF13401	ABC_tran;RsgA_GTPase;AAA_16;Cytidylate_kin;AAA_29;Rad17;MMR_HSR1;AAA_22	ABC transporter;RsgA GTPase;AAA ATPase domain;Cytidylate kinase;P-loop containing region of AAA domain;Rad17 P-loop domain;50S ribosome-binding GTPase;AAA domain
TRINITY_DN2318_c0_g1		12.28	16	11.07	11.85	25.56	33.27	13.1167	23.56	------	------	------	------	------	------	------	------	------	------	PF01926;PF00005	MMR_HSR1;ABC_tran	50S ribosome-binding GTPase;ABC transporter
TRINITY_DN233_c3_g2	ABC transporter C family member 8-like [Durio zibethinus])	16.65	12.13	9.55	12.18	8.87	17.84	12.7767	12.9633	GO:0055085;GO:0016021;GO:0016020;GO:0000325;GO:0005774;GO:0042626;GO:0016887;GO:0005524	BP:transmembrane transport;CC:integral component of membrane;CC:membrane;CC:plant-type vacuole;CC:vacuolar membrane;MF:ATPase activity, coupled to transmembrane movement of substances;MF:ATPase activity;MF:ATP binding;	------	------	------	------	COG1132	V:Defense mechanisms)	sp|Q8LGU1|AB8C_ARATH;	ABC transporter C family member 8 OS=Arabidopsis thaliana OX=3702 GN=ABCC8 PE=2 SV=3;	PF00664	ABC_membrane	ABC transporter transmembrane region
TRINITY_DN16363_c0_g3	ABC transporter C family member 8 [Elaeis guineensis])	10.06	11.65	14.52	21.06	11.63	5.21	12.0767	12.6333	GO:0055085;GO:0016021;GO:0016020;GO:0000325;GO:0005774;GO:0042626;GO:0016887;GO:0005524	BP:transmembrane transport;CC:integral component of membrane;CC:membrane;CC:plant-type vacuole;CC:vacuolar membrane;MF:ATPase activity, coupled to transmembrane movement of substances;MF:ATPase activity;MF:ATP binding;	K05665	ABCC1	map02010	ABC transporters)	COG1132	V:Defense mechanisms)	sp|Q9LK64|AB3C_ARATH;	ABC transporter C family member 3 OS=Arabidopsis thaliana OX=3702 GN=ABCC3 PE=1 SV=1;	------	------	------
TRINITY_DN2326_c0_g1		8.94	14.77	11.82	13.43	13.89	11.77	11.8433	13.03	------	------	K19681	IFT52	------	------	ENOG410XPGR	U:Intracellular trafficking, secretion, and vesicular transport)	sp|Q62559|IFT52_MOUSE;	Intraflagellar transport protein 52 homolog OS=Mus musculus OX=10090 GN=Ift52 PE=1 SV=2;	PF09822	ABC_transp_aux	ABC-type uncharacterized transport system
TRINITY_DN42503_c0_g2	ABC transporter C family member 8-like [Panicum miliaceum])	15.3	10.04	9.01	6.53	13.55	16.44	11.45	12.1733	GO:0055085;GO:0016021;GO:0016020;GO:0000325;GO:0005774;GO:0042626;GO:0016887;GO:0005524	BP:transmembrane transport;CC:integral component of membrane;CC:membrane;CC:plant-type vacuole;CC:vacuolar membrane;MF:ATPase activity, coupled to transmembrane movement of substances;MF:ATPase activity;MF:ATP binding;	K05666	ABCC2	map02010	ABC transporters)	COG1132	V:Defense mechanisms)	sp|Q9LYS2|AB10C_ARATH;	ABC transporter C family member 10 OS=Arabidopsis thaliana OX=3702 GN=ABCC10 PE=2 SV=2;	PF00005;PF13555;PF01926	ABC_tran;AAA_29;MMR_HSR1	ABC transporter;P-loop containing region of AAA domain;50S ribosome-binding GTPase
TRINITY_DN15631_c0_g1	hypothetical protein AMTR_s00040p00185210 [Amborella trichopoda])	12.11	14.18	7.93	12.3	13.92	34.52	11.4067	20.2467	GO:0055085;GO:0016021;GO:0005886;GO:0016787;GO:0042626;GO:0016887;GO:0005524	BP:transmembrane transport;CC:integral component of membrane;CC:plasma membrane;MF:hydrolase activity;MF:ATPase activity, coupled to transmembrane movement of substances;MF:ATPase activity;MF:ATP binding;	------	------	------	------	COG0842	V:Defense mechanisms)	sp|A2WSH0|AB36G_ORYSI;	ABC transporter G family member 36 OS=Oryza sativa subsp. indica OX=39946 GN=ABCG36 PE=2 SV=1;	PF01061	ABC2_membrane	ABC-2 type transporter
TRINITY_DN18772_c0_g1	hypothetical protein BRADI_2g33210v3 [Brachypodium distachyon])	11.03	15.21	7.85	16.01	9.54	6.71	11.3633	10.7533	GO:0055085;GO:0016021;GO:0016020;GO:0000325;GO:0005774;GO:0042626;GO:0016887;GO:0032440;GO:0005524	BP:transmembrane transport;CC:integral component of membrane;CC:membrane;CC:plant-type vacuole;CC:vacuolar membrane;MF:ATPase activity, coupled to transmembrane movement of substances;MF:ATPase activity;MF:2-alkenal reductase [NA;MF:ATP binding;	K05665;K05670	ABCC1;ABCC13	map02010	ABC transporters)	COG1132	V:Defense mechanisms)	sp|Q8LGU1|AB8C_ARATH;	ABC transporter C family member 8 OS=Arabidopsis thaliana OX=3702 GN=ABCC8 PE=2 SV=3;	PF00005;PF18023	ABC_tran;FKBP_N_2	ABC transporter;BDBT FKBP like N-terminal
TRINITY_DN2969_c0_g1	ABC transporter B family member 25-like [Prosopis alba])	10.6	14.26	8.72	10.91	10.44	9.14	11.1933	10.1633	GO:0055085;GO:0016021;GO:0042626;GO:0016887;GO:0005524	BP:transmembrane transport;CC:integral component of membrane;MF:ATPase activity, coupled to transmembrane movement of substances;MF:ATPase activity;MF:ATP binding;	------	------	------	------	COG1132	V:Defense mechanisms)	sp|Q9FNU2|AB25B_ORYSJ;	ABC transporter B family member 25 OS=Oryza sativa subsp. japonica OX=39947 GN=ABCB25 PE=2 SV=1;	PF00005;PF02463;PF09818	ABC_tran;SMC_N;ABC_ATPase	ABC transporter;RecF/RecN/SMC N terminal domain;Predicted ATPase of the ABC class
TRINITY_DN44934_c0_g1	PREDICTED: lactotransferrin-like [Eucalyptus grandis])	11.24	11.23	10.22	12.8	6.23	5.95	10.8967	8.32667	------	------	K06569	MFI2, CD228	------	------	ENOG410XQ36	O:Posttranslational modification, protein turnover, chaperones)	sp|Q6PGT3|TRFEB_XENLA;	Serotransferrin-B OS=Xenopus laevis OX=8355 GN=tf-b PE=2 SV=1;	PF00405;PF12974	Transferrin;Phosphonate-bd	Transferrin;ABC transporter, phosphonate, periplasmic substrate-binding protein
TRINITY_DN26370_c0_g3	ABC transporter C family member 3 [Populus trichocarpa])	13.4	14.01	5.26	19.89	6.75	12.05	10.89	12.8967	GO:0055085;GO:0016021;GO:0016020;GO:0000325;GO:0005774;GO:0042626;GO:0016887;GO:0005524	BP:transmembrane transport;CC:integral component of membrane;CC:membrane;CC:plant-type vacuole;CC:vacuolar membrane;MF:ATPase activity, coupled to transmembrane movement of substances;MF:ATPase activity;MF:ATP binding;	K05673;K05666	ABCC4;ABCC2	map02010	ABC transporters)	COG1132	V:Defense mechanisms)	sp|Q80WJ6|MRP9_MOUSE;	Multidrug resistance-associated protein 9 OS=Mus musculus OX=10090 GN=Abcc12 PE=2 SV=1;	------	------	------
TRINITY_DN35964_c0_g1	hypothetical protein AMTR_s00263p00014290 [Amborella trichopoda])	10.7	14.76	7.14	12.07	9.04	8.98	10.8667	10.03	GO:0055085;GO:0000325;GO:0016021;GO:0016020;GO:0005774;GO:0042626;GO:0016887;GO:0005524	BP:transmembrane transport;CC:plant-type vacuole;CC:integral component of membrane;CC:membrane;CC:vacuolar membrane;MF:ATPase activity, coupled to transmembrane movement of substances;MF:ATPase activity;MF:ATP binding;	------	------	------	------	COG1132	V:Defense mechanisms)	sp|Q8LGU1|AB8C_ARATH;	ABC transporter C family member 8 OS=Arabidopsis thaliana OX=3702 GN=ABCC8 PE=2 SV=3;	------	------	------
TRINITY_DN26131_c0_g1	Multidrug resistance protein ABC transporter family [Zostera marina])	10.11	17.83	4.52	14.57	12.43	6.57	10.82	11.19	GO:0055085;GO:0016021;GO:0016020;GO:0000325;GO:0005774;GO:0042626;GO:0016887;GO:0005524	BP:transmembrane transport;CC:integral component of membrane;CC:membrane;CC:plant-type vacuole;CC:vacuolar membrane;MF:ATPase activity, coupled to transmembrane movement of substances;MF:ATPase activity;MF:ATP binding;	------	------	------	------	------	------	sp|Q7FB56|AB15C_ARATH;	Putative ABC transporter C family member 15 OS=Arabidopsis thaliana OX=3702 GN=ABCC15 PE=5 SV=2;	------	------	------
TRINITY_DN26484_c1_g1	hypothetical protein C3L33_00184, partial [Rhododendron williamsianum])	0	19.49	12.84	0	0	14.31	10.7767	4.77	GO:0055085;GO:0016021;GO:0016020;GO:0000325;GO:0005774;GO:0042626;GO:0016887;GO:0005524	BP:transmembrane transport;CC:integral component of membrane;CC:membrane;CC:plant-type vacuole;CC:vacuolar membrane;MF:ATPase activity, coupled to transmembrane movement of substances;MF:ATPase activity;MF:ATP binding;	------	------	------	------	COG1132	V:Defense mechanisms)	sp|Q8LGU1|AB8C_ARATH;	ABC transporter C family member 8 OS=Arabidopsis thaliana OX=3702 GN=ABCC8 PE=2 SV=3;	PF00005	ABC_tran	ABC transporter
TRINITY_DN6592_c0_g1	PREDICTED: ABC transporter B family member 29, chloroplastic [Nelumbo nucifera])	11.22	10.64	9.69	10.43	9.48	13.37	10.5167	11.0933	GO:0055085;GO:0016021;GO:0042626;GO:0016887;GO:0005524	BP:transmembrane transport;CC:integral component of membrane;MF:ATPase activity, coupled to transmembrane movement of substances;MF:ATPase activity;MF:ATP binding;	K02021	ABC.MR	------	------	COG1132	V:Defense mechanisms)	sp|Q9LZB8|AB29B_ARATH;	ABC transporter B family member 29, chloroplastic OS=Arabidopsis thaliana OX=3702 GN=ABCB29 PE=1 SV=1;	PF00005;PF00664;PF02463	ABC_tran;ABC_membrane;SMC_N	ABC transporter;ABC transporter transmembrane region;RecF/RecN/SMC N terminal domain
TRINITY_DN22221_c0_g1	unknown [Picea sitchensis])	10.66	10.66	9.54	8.29	9.99	12.39	10.2867	10.2233	GO:0016021;GO:0016301	CC:integral component of membrane;MF:kinase activity;	K08869	ADCK, ABC1	------	------	COG0661	S:Function unknown)	sp|Q55G83|ABKC_DICDI;	Probable serine/threonine-protein kinase abkC OS=Dictyostelium discoideum OX=44689 GN=abkC PE=3 SV=1;	PF03109	ABC1	ABC1 family
TRINITY_DN40220_c0_g2	PREDICTED: cell division control protein 3-like [Pyrus x bretschneideri])	8.52	18.36	3.27	9.78	17.76	0	10.05	9.18	GO:0003676;GO:0005525	MF:nucleic acid binding;MF:GTP binding;	K16944	SEPT7, CDC3	------	------	------	------	sp|P39826|CDC3_CANAX;	Cell division control protein 3 OS=Candida albicans OX=5476 GN=CDC3 PE=3 SV=1;	PF00735;PF01926;PF00005;PF03193;PF04548;PF00009	Septin;MMR_HSR1;ABC_tran;RsgA_GTPase;AIG1;GTP_EFTU	Septin;50S ribosome-binding GTPase;ABC transporter;RsgA GTPase;AIG1 family;Elongation factor Tu GTP binding domain
TRINITY_DN52142_c0_g1	unknown [Picea sitchensis])	10.71	10.7	8.5	8.47	9.5	10.61	9.97	9.52667	GO:0016021;GO:0042626;GO:0016887;GO:0005524	CC:integral component of membrane;MF:ATPase activity, coupled to transmembrane movement of substances;MF:ATPase activity;MF:ATP binding;	K05663	ATM	map02010	ABC transporters)	COG5265	L:Replication, recombination and repair)	sp|Q9FUT3|AB23B_ARATH;	ABC transporter B family member 23, mitochondrial OS=Arabidopsis thaliana OX=3702 GN=ABCB23 PE=1 SV=1;	PF00005;PF00664;PF02463;PF13401;PF13191;PF13555	ABC_tran;ABC_membrane;SMC_N;AAA_22;AAA_16;AAA_29	ABC transporter;ABC transporter transmembrane region;RecF/RecN/SMC N terminal domain;AAA domain;AAA ATPase domain;P-loop containing region of AAA domain
TRINITY_DN3627_c0_g1	ABC transporter C family member 14 [Elaeis guineensis])	18.45	8.07	3.23	15.48	1.7	16.69	9.91667	11.29	GO:0009624;GO:0009414;GO:0010118;GO:0009611;GO:0055085;GO:0005794;GO:0005773;GO:0016021;GO:0016020;GO:0000325;GO:0005774;GO:0005829;GO:0005886;GO:0009506;GO:0042626;GO:0008559;GO:0016887;GO:0005524	BP:response to nematode;BP:response to water deprivation;BP:stomatal movement;BP:response to wounding;BP:transmembrane transport;CC:Golgi apparatus;CC:vacuole;CC:integral component of membrane;CC:membrane;CC:plant-type vacuole;CC:vacuolar membrane;CC:cytosol;CC:plasma membrane;CC:plasmodesma;MF:ATPase activity, coupled to transmembrane movement of substances;MF:xenobiotic-transporting ATPase acti…	K05665;K05666	ABCC1;ABCC2	map02010	ABC transporters)	COG1132	S:Function unknown)	sp|Q7DM58|AB4C_ARATH;	ABC transporter C family member 4 OS=Arabidopsis thaliana OX=3702 GN=ABCC4 PE=1 SV=2;	PF00005;PF13555;PF01926	ABC_tran;AAA_29;MMR_HSR1	ABC transporter;P-loop containing region of AAA domain;50S ribosome-binding GTPase
TRINITY_DN9886_c0_g1	PREDICTED: ABC transporter C family member 3-like [Pyrus x bretschneideri])	12.8	11.67	4.92	11.56	7.36	5.59	9.79667	8.17	GO:0016021;GO:0042626;GO:0016887;GO:0005524	CC:integral component of membrane;MF:ATPase activity, coupled to transmembrane movement of substances;MF:ATPase activity;MF:ATP binding;	K05673	ABCC4	map02010	ABC transporters)	COG1132	V:Defense mechanisms)	sp|P91660|L259_DROME;	Probable multidrug resistance-associated protein letha;	PF00664	ABC_membrane	ABC transporter transmembrane region
TRINITY_DN80766_c0_g1	Half-size ABCG transporter [Parasponia andersonii])	8.31	16.8	4.21	14.03	8.43	0.95	9.77333	7.80333	GO:0016021;GO:0016887;GO:0005524	CC:integral component of membrane;MF:ATPase activity;MF:ATP binding;	------	------	------	------	COG1131	S:Function unknown)	sp|A0A0M4FLW6|STR2_PETHY;	ABC transporter G family member STR2 OS=Petunia hybrida OX=4102 GN=STR2 PE=2 SV=1;	PF01061;PF00005;PF19055;PF12698;PF13555;PF13481	ABC2_membrane;ABC_tran;ABC2_membrane_7;ABC2_membrane_3;AAA_29;AAA_25	ABC-2 type transporter;ABC transporter;ABC-2 type transporter;ABC-2 family transporter protein;P-loop containing region of AAA domain;AAA domain
TRINITY_DN2613_c0_g2	ABC transporter B family member 19-like [Vitis riparia])	9.61	10.45	9.17	11.39	7.51	6.02	9.74333	8.30667	GO:0055085;GO:0016021;GO:0042626;GO:0016887;GO:0005524	BP:transmembrane transport;CC:integral component of membrane;MF:ATPase activity, coupled to transmembrane movement of substances;MF:ATPase activity;MF:ATP binding;	K05658	ABCB1, CD243	map02010	ABC transporters)	COG1132	V:Defense mechanisms)	sp|Q9LJX0|AB19B_ARATH;	ABC transporter B family member 19 OS=Arabidopsis thaliana OX=3702 GN=ABCB19 PE=1 SV=1;	PF00664;PF00005	ABC_membrane;ABC_tran	ABC transporter transmembrane region;ABC transporter
TRINITY_DN15956_c0_g1	hypothetical protein CDL15_Pgr005006 [Punica granatum])	5.76	6.62	16.75	3.22	2.48	3.79	9.71	3.16333	GO:0055085;GO:0016021;GO:0016020;GO:0000325;GO:0005774;GO:0042626;GO:0016887;GO:0032440;GO:0005524	BP:transmembrane transport;CC:integral component of membrane;CC:membrane;CC:plant-type vacuole;CC:vacuolar membrane;MF:ATPase activity, coupled to transmembrane movement of substances;MF:ATPase activity;MF:2-alkenal reductase [NA;MF:ATP binding;	------	------	------	------	COG1132	V:Defense mechanisms)	sp|Q8LGU1|AB8C_ARATH;	ABC transporter C family member 8 OS=Arabidopsis thaliana OX=3702 GN=ABCC8 PE=2 SV=3;	------	------	------
TRINITY_DN10463_c1_g1	multidrug resistance-associated protein 6 [Artemisia annua])	4.59	16.1	8.34	13.14	3.59	4.3	9.67667	7.01	GO:0016021;GO:0042626;GO:0016887;GO:0005524	CC:integral component of membrane;MF:ATPase activity, coupled to transmembrane movement of substances;MF:ATPase activity;MF:ATP binding;	------	------	------	------	COG1132	V:Defense mechanisms)	sp|Q8LGU1|AB8C_ARATH;	ABC transporter C family member 8 OS=Arabidopsis thaliana OX=3702 GN=ABCC8 PE=2 SV=3;	PF00005	ABC_tran	ABC transporter
TRINITY_DN2301_c0_g1	LOW QUALITY PROTEIN: midasin [Amborella trichopoda])	9.11	10.42	9.13	8.41	10.21	8.91	9.55333	9.17667	GO:0000027;GO:0005634;GO:0016887;GO:0005524	BP:ribosomal large subunit assembly;CC:nucleus;MF:ATPase activity;MF:ATP binding;	K14572	MDN1, REA1	map03008	Ribosome biogenesis in eukaryotes)	COG5271	S:Function unknown)	sp|A0A1P8AUY4|MDN1_ARATH;	Midasin OS=Arabidopsis thaliana OX=3702 GN=MDN1 PE=1 SV=1;	PF07728;PF17867;PF12775;PF07726;PF00004;PF17865;PF13191;PF00158;PF00005;PF13401;PF03215;PF14532;PF02367	AAA_5;AAA_lid_7;AAA_7;AAA_3;AAA;AAA_lid_5;AAA_16;Sigma54_activat;ABC_tran;AAA_22;Rad17;Sigma54_activ_2;TsaE	AAA domain (dynein-related subfamily);Midasin AAA lid domain;P-loop containing dynein motor region;ATPase family associated with various cellular activities (AAA);ATPase family associated with various cellular activities (AAA);Midasin AAA lid domain;AAA ATPase domain;Sigma-54 interaction domain;ABC transporter;AAA domain;Rad17 P-loop domain;Sigma-54 interaction domain;Threonylcarbamoyl adenosine …
TRINITY_DN11890_c0_g1	ABC transporter B family member 25-like [Herrania umbratica])	9.07	10.04	9.16	10.1	8.37	6.51	9.42333	8.32667	GO:0055085;GO:0016021;GO:0042626;GO:0016887;GO:0005524	BP:transmembrane transport;CC:integral component of membrane;MF:ATPase activity, coupled to transmembrane movement of substances;MF:ATPase activity;MF:ATP binding;	------	------	------	------	COG1132	V:Defense mechanisms)	sp|Q9FNU2|AB25B_ORYSJ;	ABC transporter B family member 25 OS=Oryza sativa subsp. japonica OX=39947 GN=ABCB25 PE=2 SV=1;	PF00664;PF00005;PF02463	ABC_membrane;ABC_tran;SMC_N	ABC transporter transmembrane region;ABC transporter;RecF/RecN/SMC N terminal domain
TRINITY_DN7447_c0_g1	unknown [Picea sitchensis])	5.05	9.13	13.74	5.71	14.14	11.43	9.30667	10.4267	GO:0055085;GO:0016021;GO:0005886;GO:0042626;GO:0016887;GO:0005524	BP:transmembrane transport;CC:integral component of membrane;CC:plasma membrane;MF:ATPase activity, coupled to transmembrane movement of substances;MF:ATPase activity;MF:ATP binding;	------	------	------	------	COG1131	V:Defense mechanisms)	sp|Q93YS4|AB22G_ARATH;	ABC transporter G family member 22 OS=Arabidopsis thaliana OX=3702 GN=ABCG22 PE=1 SV=1;	PF01061;PF19055;PF12698	ABC2_membrane;ABC2_membrane_7;ABC2_membrane_3	ABC-2 type transporter;ABC-2 type transporter;ABC-2 family transporter protein
TRINITY_DN20789_c0_g3	ATP-binding cassette containing protein, partial [Parasponia andersonii])	21.92	0	5.96	11.25	19.16	0	9.29333	10.1367	GO:0016021;GO:0042626;GO:0016887;GO:0005524	CC:integral component of membrane;MF:ATPase activity, coupled to transmembrane movement of substances;MF:ATPase activity;MF:ATP binding;	ccaj;K05666	;ABCC2	map02010	ABC transporters)	COG1132	V:Defense mechanisms)	sp|Q8LGU1|AB8C_ARATH;	ABC transporter C family member 8 OS=Arabidopsis thaliana OX=3702 GN=ABCC8 PE=2 SV=3;	PF00005;PF13555;PF12775	ABC_tran;AAA_29;AAA_7	ABC transporter;P-loop containing region of AAA domain;P-loop containing dynein motor region
TRINITY_DN9912_c0_g2	LOW QUALITY PROTEIN: serotransferrin-like [Cicer arietinum])	11.4	9.12	6.62	9.67	8.76	6.73	9.04667	8.38667	------	------	K06569	MFI2, CD228	------	------	ENOG410XQ36	O:Posttranslational modification, protein turnover, chaperones)	sp|P79815|TRFE_ONCKI;	Serotransferrin OS=Oncorhynchus kisutch OX=8019 GN=tf PE=2 SV=1;	PF00405;PF12974	Transferrin;Phosphonate-bd	Transferrin;ABC transporter, phosphonate, periplasmic substrate-binding protein
TRINITY_DN4585_c0_g1	PREDICTED: ABC transporter G family member 29-like [Prunus mume])	10.81	11.85	3.96	15.96	17.46	10.13	8.87333	14.5167	GO:0055085;GO:0016021;GO:0005886;GO:0042626;GO:0016887;GO:0005524	BP:transmembrane transport;CC:integral component of membrane;CC:plasma membrane;MF:ATPase activity, coupled to transmembrane movement of substances;MF:ATPase activity;MF:ATP binding;	------	------	------	------	COG0842	V:Defense mechanisms)	sp|Q5Z9S8|AB42G_ORYSJ;	ABC transporter G family member 42 OS=Oryza sativa subsp. japonica OX=39947 GN=ABCG42 PE=2 SV=1;	PF01061;PF00005;PF08370;PF14510;PF19055;PF00004	ABC2_membrane;ABC_tran;PDR_assoc;ABC_trans_N;ABC2_membrane_7;AAA	ABC-2 type transporter;ABC transporter;Plant PDR ABC transporter associated;ABC-transporter N-terminal;ABC-2 type transporter;ATPase family associated with various cellular activities (AAA)
TRINITY_DN67597_c0_g1	unknown [Picea sitchensis])	8.01	16.34	2.14	12.86	5.53	9.93	8.83	9.44	GO:0016021;GO:0042626;GO:0016887;GO:0005524	CC:integral component of membrane;MF:ATPase activity, coupled to transmembrane movement of substances;MF:ATPase activity;MF:ATP binding;	------	------	------	------	COG1132	V:Defense mechanisms)	sp|Q8LGU1|AB8C_ARATH;	ABC transporter C family member 8 OS=Arabidopsis thaliana OX=3702 GN=ABCC8 PE=2 SV=3;	PF00005	ABC_tran	ABC transporter
TRINITY_DN1976_c0_g1	predicted protein [Hordeum vulgare subsp. vulgare])	10.36	7.91	7.94	7.82	11.26	10.97	8.73667	10.0167	GO:0016021;GO:0009507;GO:0005524;GO:0004672	CC:integral component of membrane;CC:chloroplast;MF:ATP binding;MF:protein kinase activity;	K08869	ADCK, ABC1	------	------	COG0661	S:Function unknown)	sp|Q55680|Y005_SYNY3;	Uncharacterized protein sll0005 OS=Synechocystis sp.;	PF03109;PF00069;PF01636	ABC1;Pkinase;APH	ABC1 family;Protein kinase domain;Phosphotransferase enzyme family
TRINITY_DN6871_c0_g1	ABC transporter D family member 2, chloroplastic isoform X2 [Asparagus officinalis])	8.45	9.35	8.38	9.89	7.88	6.07	8.72667	7.94667	GO:0016021;GO:0009507;GO:0042626;GO:0016887;GO:0005524	CC:integral component of membrane;CC:chloroplast;MF:ATPase activity, coupled to transmembrane movement of substances;MF:ATPase activity;MF:ATP binding;	------	------	------	------	COG4178	S:Function unknown)	sp|Q6NLC1|AB2D_ARATH;	ABC transporter D family member 2, chloroplastic OS=Arabidopsis thaliana OX=3702 GN=ABCC2 PE=1 SV=1;	PF06472;PF00005;PF05992;PF05729;PF13191	ABC_membrane_2;ABC_tran;SbmA_BacA;NACHT;AAA_16	ABC transporter transmembrane region 2;ABC transporter;SbmA/BacA-like family;NACHT domain;AAA ATPase domain
TRINITY_DN7216_c0_g1	ATP-binding cassette containing protein [Trema orientale])	6.44	8.93	9.15	11.19	4.02	5.37	8.17333	6.86	GO:0055085;GO:0016021;GO:0016020;GO:0000325;GO:0005774;GO:0042626;GO:0016887;GO:0005524	BP:transmembrane transport;CC:integral component of membrane;CC:membrane;CC:plant-type vacuole;CC:vacuolar membrane;MF:ATPase activity, coupled to transmembrane movement of substances;MF:ATPase activity;MF:ATP binding;	------	------	------	------	COG1132	V:Defense mechanisms)	sp|Q8LGU1|AB8C_ARATH;	ABC transporter C family member 8 OS=Arabidopsis thaliana OX=3702 GN=ABCC8 PE=2 SV=3;	------	------	------
TRINITY_DN26257_c0_g1	hypothetical protein Ahy_B04g070294 isoform M [Arachis hypogaea])	0	24.51	0	10.85	4.59	0	8.17	5.14667	GO:0016021;GO:0042626;GO:0016887;GO:0005524	CC:integral component of membrane;MF:ATPase activity, coupled to transmembrane movement of substances;MF:ATPase activity;MF:ATP binding;	------	------	------	------	------	------	sp|Q7FB56|AB15C_ARATH;	Putative ABC transporter C family member 15 OS=Arabidopsis thaliana OX=3702 GN=ABCC15 PE=5 SV=2;	------	------	------
TRINITY_DN2088_c0_g1	pleiotropic drug resistance protein 2 [Amborella trichopoda])	10.56	10.16	3.66	7.77	10	9.97	8.12667	9.24667	GO:0055085;GO:0016021;GO:0005886;GO:0042626;GO:0016887;GO:0005524	BP:transmembrane transport;CC:integral component of membrane;CC:plasma membrane;MF:ATPase activity, coupled to transmembrane movement of substances;MF:ATPase activity;MF:ATP binding;	------	------	------	------	COG0842	V:Defense mechanisms)	sp|Q8GU88|AB39G_ORYSJ;	ABC transporter G family member 39 OS=Oryza sativa subsp. japonica OX=39947 GN=ABCG39 PE=3 SV=1;	PF01061;PF00005;PF08370;PF19055;PF13304;PF14510;PF13191;PF00004	ABC2_membrane;ABC_tran;PDR_assoc;ABC2_membrane_7;AAA_21;ABC_trans_N;AAA_16;AAA	ABC-2 type transporter;ABC transporter;Plant PDR ABC transporter associated;ABC-2 type transporter;AAA domain, putative AbiEii toxin, Type IV TA system;ABC-transporter N-terminal;AAA ATPase domain;ATPase family associated with various cellular activities (AAA)
TRINITY_DN20789_c0_g2	LOW QUALITY PROTEIN: ABC transporter C family member 8-like [Vitis riparia])	7.18	12.45	4.54	15	5.43	4.94	8.05667	8.45667	GO:0016021;GO:0042626;GO:0016887;GO:0005524	CC:integral component of membrane;MF:ATPase activity, coupled to transmembrane movement of substances;MF:ATPase activity;MF:ATP binding;	K05666	ABCC2	map02010	ABC transporters)	COG1132	V:Defense mechanisms)	sp|Q8LGU1|AB8C_ARATH;	ABC transporter C family member 8 OS=Arabidopsis thaliana OX=3702 GN=ABCC8 PE=2 SV=3;	PF00664	ABC_membrane	ABC transporter transmembrane region
TRINITY_DN24776_c0_g1	DNA-directed RNA polymerase subunit 10-like protein [Eutrema salsugineum])	8.32	13.89	1.12	5.05	0	0	7.77667	1.68333	GO:0006366;GO:0006360;GO:0006351;GO:0042797;GO:0005736;GO:0005665;GO:0005666;GO:0003677;GO:0003899;GO:0008270	BP:transcription from RNA polymerase II promoter;BP:transcription from RNA polymerase I promoter;BP:transcription, DNA-templated;BP:tRNA transcription from RNA polymerase III promoter;CC:DNA-directed RNA polymerase I complex;CC:DNA-directed RNA polymerase II, core complex;CC:DNA-directed RNA polymerase III complex;MF:DNA binding;MF:DNA-directed RNA polymerase activity;MF:zinc ion binding;	K03007	RPB10, POLR2L	map03020	RNA polymerase)	COG1644	K:Transcription)	sp|O13877|RPAB5_SCHPO;	DNA-directed RNA polymerases I, II, and III subunit RPABC5 OS=Schizosaccharomyces pombe;	PF01194	RNA_pol_N	RNA polymerases N / 8 kDa subunit
TRINITY_DN10183_c0_g1		10.87	8.36	3.98	12.79	4.89	5.34	7.73667	7.67333	------	------	------	------	------	------	ENOG4111FFX;ENOG410Z4IW	S:Function unknown);	------	------	PF01926;PF00005	MMR_HSR1;ABC_tran	50S ribosome-binding GTPase;ABC transporter
TRINITY_DN16363_c0_g4	ABC transporter C family member 8, partial [Mucuna pruriens])	7.68	8.34	7.09	5.93	10.49	7.4	7.70333	7.94	GO:0055085;GO:0016021;GO:0016020;GO:0000325;GO:0005774;GO:0042626;GO:0016887;GO:0005524	BP:transmembrane transport;CC:integral component of membrane;CC:membrane;CC:plant-type vacuole;CC:vacuolar membrane;MF:ATPase activity, coupled to transmembrane movement of substances;MF:ATPase activity;MF:ATP binding;	------	------	------	------	COG1132	V:Defense mechanisms)	sp|Q9M1C7|AB9C_ARATH;	ABC transporter C family member 9 OS=Arabidopsis thaliana OX=3702 GN=ABCC9 PE=2 SV=2;	------	------	------
TRINITY_DN1620_c0_g2	pleiotropic drug resistance protein 2 [Amborella trichopoda])	9.97	11.02	2.11	10.28	10.33	9.27	7.7	9.96	GO:0055085;GO:0016021;GO:0005886;GO:0042626;GO:0016887;GO:0005524	BP:transmembrane transport;CC:integral component of membrane;CC:plasma membrane;MF:ATPase activity, coupled to transmembrane movement of substances;MF:ATPase activity;MF:ATP binding;	------	------	------	------	COG0842	V:Defense mechanisms)	sp|Q76CU2|PDR1_TOBAC;	Pleiotropic drug resistance protein 1 OS=Nicotiana tabacum OX=4097 GN=PDR1 PE=2 SV=1;	PF01061;PF00005;PF08370;PF19055;PF14510;PF13304;PF13555;PF13481	ABC2_membrane;ABC_tran;PDR_assoc;ABC2_membrane_7;ABC_trans_N;AAA_21;AAA_29;AAA_25	ABC-2 type transporter;ABC transporter;Plant PDR ABC transporter associated;ABC-2 type transporter;ABC-transporter N-terminal;AAA domain, putative AbiEii toxin, Type IV TA system;P-loop containing region of AAA domain;AAA domain
TRINITY_DN13669_c0_g1	PREDICTED: probable pre-mRNA-splicing factor ATP-dependent RNA helicase DEAH4 isoform X2 [Theobroma cacao])	8.41	6.11	8.2	6.94	9.03	7.15	7.57333	7.70667	GO:0000398;GO:0005681;GO:0005524;GO:0003723;GO:0003676;GO:0004386	BP:mRNA splicing, via spliceosome;CC:spliceosomal complex;MF:ATP binding;MF:RNA binding;MF:nucleic acid binding;MF:helicase activity;	K12818	DHX8, PRP22	map03040	Spliceosome)	COG1643	S:Function unknown)	sp|Q93Y16|DEAH4_ARATH;	Probable pre-mRNA-splicing factor ATP-dependent RNA helicase DEAH4 OS=Arabidopsis thaliana OX=3702 GN=At1g27900 PE=1 SV=1;	PF04408;PF07717;PF00271;PF00270;PF13245;PF13401;PF13604;PF09848;PF00005	HA2;OB_NTP_bind;Helicase_C;DEAD;AAA_19;AAA_22;AAA_30;DUF2075;ABC_tran	Helicase associated domain (HA2);Oligonucleotide/oligosaccharide-binding (OB)-fold;Helicase conserved C-terminal domain;DEAD/DEAH box helicase;AAA domain;AAA domain;AAA domain;Uncharacterized conserved protein (DUF2075);ABC transporter
TRINITY_DN42201_c0_g1	hypothetical protein TEA_010488 [Camellia sinensis var. sinensis])	9.58	7.95	5.19	10.02	0.66	10.4	7.57333	7.02667	GO:0055085;GO:0000325;GO:0016021;GO:0016020;GO:0005774;GO:0042626;GO:0016887;GO:0005524	BP:transmembrane transport;CC:plant-type vacuole;CC:integral component of membrane;CC:membrane;CC:vacuolar membrane;MF:ATPase activity, coupled to transmembrane movement of substances;MF:ATPase activity;MF:ATP binding;	K05673;K05672;K05665	ABCC4;ABCC12;ABCC1	map02010	ABC transporters)	COG1132	F:Nucleotide transport and metabolism)	sp|Q9LZJ5|AB14C_ARATH;	ABC transporter C family member 14 OS=Arabidopsis thaliana OX=3702 GN=ABCC14 PE=1 SV=1;	PF00005	ABC_tran	ABC transporter
TRINITY_DN13529_c0_g1	TMV resistance protein N [Glycine soja])	0.22	16.78	5.29	35.37	17.12	0.58	7.43	17.69	GO:0007165;GO:0016021;GO:0016787;GO:0043531	BP:signal transduction;CC:integral component of membrane;MF:hydrolase activity;MF:ADP binding;	------	------	------	------	COG4886;ENOG4112BMQ	S:Function unknown);	sp|V9M398|RUN1_VITRO;	Disease resistance protein RUN1 OS=Vitis rotundifolia OX=103349 GN=RUN1 PE=1 SV=1;	PF00931;PF00005	NB-ARC;ABC_tran	NB-ARC domain;ABC transporter
TRINITY_DN2057_c0_g1		8.05	7.8	6.39	6.51	7.93	8.84	7.41333	7.76	------	------	K02016	ABC.FEV.S	------	------	COG0614	S:Function unknown)	------	------	PF01497;PF00733	Peripla_BP_2;Asn_synthase	Periplasmic binding protein;Asparagine synthase
TRINITY_DN9530_c0_g1	probably inactive leucine-rich repeat receptor-like protein kinase IMK2 [Amborella trichopoda])	10.71	9.32	1.96	8.15	14.41	10.9	7.33	11.1533	GO:0016021;GO:0005524;GO:0004672	CC:integral component of membrane;MF:ATP binding;MF:protein kinase activity;	------	------	------	------	COG0515;COG4886	S:Function unknown);	sp|Q9SCT4|IMK2_ARATH;	Probably inactive leucine-rich repeat receptor-like protein kinase IMK2 OS=Arabidopsis thaliana OX=3702 GN=IMK2 PE=1 SV=1;	PF07714;PF00069;PF03109	PK_Tyr_Ser-Thr;Pkinase;ABC1	Protein tyrosine and serine/threonine kinase;Protein kinase domain;ABC1 family
TRINITY_DN60865_c0_g2	multidrug resistance protein fer6-like [Quercus suber])	2.18	18.83	0.57	5.9	0.11	0.01	7.19333	2.00667	GO:0055085;GO:0016021;GO:0016020;GO:0000325;GO:0005774;GO:0042626;GO:0016887;GO:0005524	BP:transmembrane transport;CC:integral component of membrane;CC:membrane;CC:plant-type vacuole;CC:vacuolar membrane;MF:ATPase activity, coupled to transmembrane movement of substances;MF:ATPase activity;MF:ATP binding;	------	------	------	------	------	------	sp|A0A0D1CZ63|FER6_USTMA;	Multidrug resistance protein fer6 OS=Ustilago maydis;	PF00664;PF00005;PF02463	ABC_membrane;ABC_tran;SMC_N	ABC transporter transmembrane region;ABC transporter;RecF/RecN/SMC N terminal domain
TRINITY_DN1620_c1_g1	pleiotropic drug resistance protein 1-like [Syzygium oleosum])	6.44	10.11	4.4	12.27	3.43	4.1	6.98333	6.6	GO:0055085;GO:0016021;GO:0005886;GO:0042626;GO:0016887;GO:0005524	BP:transmembrane transport;CC:integral component of membrane;CC:plasma membrane;MF:ATPase activity, coupled to transmembrane movement of substances;MF:ATPase activity;MF:ATP binding;	------	------	------	------	COG0842	V:Defense mechanisms)	sp|Q9M9E1|AB40G_ARATH;	ABC transporter G family member 40 OS=Arabidopsis thaliana OX=3702 GN=ABCG40 PE=1 SV=1;	PF01061;PF12698	ABC2_membrane;ABC2_membrane_3	ABC-2 type transporter;ABC-2 family transporter protein
TRINITY_DN1157_c0_g1	ABCB2 protein [Pinus radiata])	9.49	7.39	3.81	5.7	4.96	4.5	6.89667	5.05333	GO:0055085;GO:0016021;GO:0042626;GO:0016887;GO:0005524	BP:transmembrane transport;CC:integral component of membrane;MF:ATPase activity, coupled to transmembrane movement of substances;MF:ATPase activity;MF:ATP binding;	K05658	ABCB1, CD243	map02010	ABC transporters)	COG1132	V:Defense mechanisms)	sp|Q9C7F2|AB14B_ARATH;	ABC transporter B family member 14 OS=Arabidopsis thaliana OX=3702 GN=ABCB14 PE=3 SV=1;	PF00664;PF00005;PF02463;PF13191;PF13401	ABC_membrane;ABC_tran;SMC_N;AAA_16;AAA_22	ABC transporter transmembrane region;ABC transporter;RecF/RecN/SMC N terminal domain;AAA ATPase domain;AAA domain
TRINITY_DN39526_c0_g1	elongation factor 3-like [Quercus suber])	9.42	3.17	8.03	0.03	5.03	7.85	6.87333	4.30333	GO:0016887;GO:0005524	MF:ATPase activity;MF:ATP binding;	K03235	EF3, TEF3	------	------	COG0488	S:Function unknown)	sp|P25997|EF3_CANAL;	Elongation factor 3 OS=Candida albicans;	PF00005;PF17947;PF13304;PF02463;PF13555;PF13476;PF03193;PF01926;PF00350	ABC_tran;4HB;AAA_21;SMC_N;AAA_29;AAA_23;RsgA_GTPase;MMR_HSR1;Dynamin_N	ABC transporter;Four helical bundle domain;AAA domain, putative AbiEii toxin, Type IV TA system;RecF/RecN/SMC N terminal domain;P-loop containing region of AAA domain;AAA domain;RsgA GTPase;50S ribosome-binding GTPase;Dynamin family
TRINITY_DN44132_c0_g2	putative ABC transporter C family member 13 [Helianthus annuus])	5.68	7.44	7.43	6.18	18.32	6.22	6.85	10.24	GO:0055085;GO:0016021;GO:0016020;GO:0005634;GO:0042626;GO:0003723;GO:0016887;GO:0005524	BP:transmembrane transport;CC:integral component of membrane;CC:membrane;CC:nucleus;MF:ATPase activity, coupled to transmembrane movement of substances;MF:RNA binding;MF:ATPase activity;MF:ATP binding;	obo;K05673;K05665;K05666;pgc	;ABCC4;ABCC1;ABCC2;	map02010	ABC transporters)	COG1132	V:Defense mechanisms)	sp|Q28689|MRP2_RABIT;	Canalicular multispecific organic anion transporter 1 OS=Oryctolagus cuniculus OX=9986 GN=ABCC2 PE=1 SV=1;	PF00005	ABC_tran	ABC transporter
TRINITY_DN62299_c0_g1	ABC transporter B family member 4 [Capsicum chinense])	3.84	8.14	7.86	10.82	14.84	4.08	6.61333	9.91333	GO:0015074;GO:0016021;GO:0042626;GO:0016887;GO:0008270;GO:0003676;GO:0005524	BP:DNA integration;CC:integral component of membrane;MF:ATPase activity, coupled to transmembrane movement of substances;MF:ATPase activity;MF:zinc ion binding;MF:nucleic acid binding;MF:ATP binding;	------	------	------	------	------	------	------	------	------	------	------
TRINITY_DN14593_c0_g1	unknown [Picea sitchensis])	8.08	5.32	6.39	5.51	7.13	6.87	6.59667	6.50333	GO:0016021;GO:0016301	CC:integral component of membrane;MF:kinase activity;	K08869	ADCK, ABC1	------	------	COG0661	S:Function unknown)	sp|Q55G83|ABKC_DICDI;	Probable serine/threonine-protein kinase abkC OS=Dictyostelium discoideum OX=44689 GN=abkC PE=3 SV=1;	PF03109	ABC1	ABC1 family
TRINITY_DN475_c0_g1	peroxisomal membrane protein, putative [Ricinus communis])	8.25	8.83	2.54	10.62	10.51	8.92	6.54	10.0167	GO:0016021;GO:0009507;GO:0042626;GO:0016887;GO:0005524	CC:integral component of membrane;CC:chloroplast;MF:ATPase activity, coupled to transmembrane movement of substances;MF:ATPase activity;MF:ATP binding;	K02471	bacA	map02010	ABC transporters)	COG4178	S:Function unknown)	sp|Q55774|Y182_SYNY3;	Uncharacterized ABC transporter ATP-binding protein sll0182 OS=Synechocystis sp.;	PF00005;PF02463;PF13191	ABC_tran;SMC_N;AAA_16	ABC transporter;RecF/RecN/SMC N terminal domain;AAA ATPase domain
TRINITY_DN6467_c0_g1	ABC transporter B family member 15-like isoform X1 [Punica granatum])	10.14	4.96	4.08	4.65	7.87	11.3	6.39333	7.94	GO:0055085;GO:0016021;GO:0042626;GO:0016887;GO:0005524	BP:transmembrane transport;CC:integral component of membrane;MF:ATPase activity, coupled to transmembrane movement of substances;MF:ATPase activity;MF:ATP binding;	K05658	ABCB1, CD243	map02010	ABC transporters)	------	------	sp|Q6YUU5|MDR_ORYSJ;	Putative multidrug resistance protein OS=Oryza sativa subsp. japonica OX=39947 GN=Os02g0190300 PE=3 SV=1;	PF00664;PF00005;PF02463;PF13555;PF13191	ABC_membrane;ABC_tran;SMC_N;AAA_29;AAA_16	ABC transporter transmembrane region;ABC transporter;RecF/RecN/SMC N terminal domain;P-loop containing region of AAA domain;AAA ATPase domain
TRINITY_DN11365_c0_g2	uncharacterized protein A4U43_C03F960 [Asparagus officinalis])	7.9	7.15	3.74	13.1	3.23	4.13	6.26333	6.82	GO:0016021;GO:0042626;GO:0016887;GO:0005524	CC:integral component of membrane;MF:ATPase activity, coupled to transmembrane movement of substances;MF:ATPase activity;MF:ATP binding;	K05658	ABCB1, CD243	map02010	ABC transporters)	COG1132	V:Defense mechanisms)	sp|Q9LJX0|AB19B_ARATH;	ABC transporter B family member 19 OS=Arabidopsis thaliana OX=3702 GN=ABCB19 PE=1 SV=1;	PF00005	ABC_tran	ABC transporter
TRINITY_DN13898_c0_g4	ABC transporter C family member 8 [Spatholobus suberectus])	8.47	4.62	5.52	10.62	0	22.67	6.20333	11.0967	GO:0055085;GO:0016021;GO:0016020;GO:0000325;GO:0005774;GO:0042626;GO:0016887;GO:0005524	BP:transmembrane transport;CC:integral component of membrane;CC:membrane;CC:plant-type vacuole;CC:vacuolar membrane;MF:ATPase activity, coupled to transmembrane movement of substances;MF:ATPase activity;MF:ATP binding;	K05665	ABCC1	map02010	ABC transporters)	COG1132	V:Defense mechanisms)	sp|Q8LGU1|AB8C_ARATH;	ABC transporter C family member 8 OS=Arabidopsis thaliana OX=3702 GN=ABCC8 PE=2 SV=3;	PF00005	ABC_tran	ABC transporter
TRINITY_DN8719_c0_g1	ATP-binding cassette, subfamily D (ALD), member 2 [Salvia splendens])	2.31	13.8	1.94	11.76	0	0	6.01667	3.92	GO:0006744;GO:0015916;GO:0010030;GO:0016021;GO:0046861;GO:0042626;GO:0016887;GO:0005524	BP:ubiquinone biosynthetic process;BP:fatty-acyl-CoA transport;BP:positive regulation of seed germination;CC:integral component of membrane;CC:glyoxysomal membrane;MF:ATPase activity, coupled to transmembrane movement of substances;MF:ATPase activity;MF:ATP binding;	K05678	ABCD4, PXMP1L	map04146;map02010	Peroxisome);ABC transporters)	COG4178	K:Transcription)	sp|O14678|ABCD4_HUMAN;	Lysosomal cobalamin transporter ABCD4 OS=Homo sapiens OX=9606 GN=ABCD4 PE=1 SV=1;	PF06472;PF00005	ABC_membrane_2;ABC_tran	ABC transporter transmembrane region 2;ABC transporter
TRINITY_DN6597_c1_g1	ABC transporter A family member 2-like [Prunus dulcis])	5.32	5.26	7.21	3.26	3.47	5.32	5.93	4.01667	GO:0006869;GO:0043231;GO:0016021;GO:0005319;GO:0042626;GO:0016887;GO:0005524	BP:lipid transport;CC:intracellular membrane-bounded organelle;CC:integral component of membrane;MF:lipid transporter activity;MF:ATPase activity, coupled to transmembrane movement of substances;MF:ATPase activity;MF:ATP binding;	------	------	------	------	ENOG410XXUP	S:Function unknown)	sp|Q9FKF2|AB11A_ARATH;	ABC transporter A family member 11 OS=Arabidopsis thaliana OX=3702 GN=ABCA11 PE=3 SV=1;	PF12698;PF00005;PF13304	ABC2_membrane_3;ABC_tran;AAA_21	ABC-2 family transporter protein;ABC transporter;AAA domain, putative AbiEii toxin, Type IV TA system
TRINITY_DN79277_c0_g1	ABC transporter C family member 8-like [Dendrobium catenatum])	0.98	16.3	0.46	3.41	0.24	0.97	5.91333	1.54	GO:0016021;GO:0042626;GO:0016887;GO:0005524	CC:integral component of membrane;MF:ATPase activity, coupled to transmembrane movement of substances;MF:ATPase activity;MF:ATP binding;	------	------	------	------	COG1132	V:Defense mechanisms)	sp|Q9LZJ5|AB14C_ARATH;	ABC transporter C family member 14 OS=Arabidopsis thaliana OX=3702 GN=ABCC14 PE=1 SV=1;	PF00005	ABC_tran	ABC transporter
TRINITY_DN32260_c0_g1	PREDICTED: ABC transporter B family member 28 [Nelumbo nucifera])	6.98	5.11	5.42	5.12	5.12	4.01	5.83667	4.75	GO:0055085;GO:0016021;GO:0042626;GO:0016887;GO:0005524	BP:transmembrane transport;CC:integral component of membrane;MF:ATPase activity, coupled to transmembrane movement of substances;MF:ATPase activity;MF:ATP binding;	K05657	ABCB10	map02010	ABC transporters)	COG1132	V:Defense mechanisms)	sp|Q8LPQ6|AB28B_ARATH;	ABC transporter B family member 28 OS=Arabidopsis thaliana OX=3702 GN=ABCB28 PE=2 SV=1;	PF00005;PF02463;PF09818;PF13191;PF00664;PF13401	ABC_tran;SMC_N;ABC_ATPase;AAA_16;ABC_membrane;AAA_22	ABC transporter;RecF/RecN/SMC N terminal domain;Predicted ATPase of the ABC class;AAA ATPase domain;ABC transporter transmembrane region;AAA domain
TRINITY_DN9650_c0_g1	ABC transporter G family member 22 like [Actinidia chinensis var. chinensis])	2.56	6	8.9	5.45	7.76	24.22	5.82	12.4767	GO:0055085;GO:0016021;GO:0005886;GO:0042626;GO:0016887;GO:0005524	BP:transmembrane transport;CC:integral component of membrane;CC:plasma membrane;MF:ATPase activity, coupled to transmembrane movement of substances;MF:ATPase activity;MF:ATP binding;	------	------	------	------	COG1131;COG1131	J:Translation, ribosomal structure and biogenesis);O:Posttranslational modification, protein turnover, chaperones)	sp|Q93YS4|AB22G_ARATH;	ABC transporter G family member 22 OS=Arabidopsis thaliana OX=3702 GN=ABCG22 PE=1 SV=1;	PF01061;PF00005;PF19055	ABC2_membrane;ABC_tran;ABC2_membrane_7	ABC-2 type transporter;ABC transporter;ABC-2 type transporter
TRINITY_DN7094_c0_g1	uncharacterized protein LOC113358599 isoform X4 [Papaver somniferum])	4.49	5.38	7.48	4.73	6.47	11.75	5.78333	7.65	GO:0005524;GO:0004672	MF:ATP binding;MF:protein kinase activity;	K08869	ADCK, ABC1	------	------	COG0661	S:Function unknown)	sp|Q55680|Y005_SYNY3;	Uncharacterized protein sll0005 OS=Synechocystis sp.;	PF03109;PF01636;PF00069	ABC1;APH;Pkinase	ABC1 family;Phosphotransferase enzyme family;Protein kinase domain
TRINITY_DN13308_c0_g1	AAA+ ATPase domain-containing protein [Artemisia annua])	3.09	4.58	9.64	3.42	6.74	6.83	5.77	5.66333	GO:0055085;GO:0016021;GO:0042626;GO:0016887;GO:0005524	BP:transmembrane transport;CC:integral component of membrane;MF:ATPase activity, coupled to transmembrane movement of substances;MF:ATPase activity;MF:ATP binding;	K05658	ABCB1, CD243	map02010	ABC transporters)	COG1132	V:Defense mechanisms)	sp|Q6YUU5|MDR_ORYSJ;	Putative multidrug resistance protein OS=Oryza sativa subsp. japonica OX=39947 GN=Os02g0190300 PE=3 SV=1;	PF00664;PF00005;PF02463;PF13555	ABC_membrane;ABC_tran;SMC_N;AAA_29	ABC transporter transmembrane region;ABC transporter;RecF/RecN/SMC N terminal domain;P-loop containing region of AAA domain
TRINITY_DN38989_c0_g1	putative multidrug resistance protein [Zea mays])	6.6	6.84	3.6	12.18	3.45	1.25	5.68	5.62667	GO:0055085;GO:0016021;GO:0042626;GO:0016887;GO:0005524	BP:transmembrane transport;CC:integral component of membrane;MF:ATPase activity, coupled to transmembrane movement of substances;MF:ATPase activity;MF:ATP binding;	K05658	ABCB1, CD243	map02010	ABC transporters)	COG1132	Q:Secondary metabolites biosynthesis, transport and catabolism)	sp|Q8T9W4|ABCB3_DICDI;	ABC transporter B family member 3 OS=Dictyostelium discoideum OX=44689 GN=abcB3 PE=3 SV=1;	PF00005	ABC_tran	ABC transporter
TRINITY_DN11365_c0_g1	unnamed protein product [Coffea canephora])	5.3	6.62	5.01	4.74	4.47	4.4	5.64333	4.53667	GO:0048443;GO:0010218;GO:0009733;GO:0009639;GO:0009734;GO:0009637;GO:0043481;GO:0009926;GO:0010540;GO:0010541;GO:0008361;GO:0090691;GO:0055085;GO:0009640;GO:0009958;GO:0048364;GO:0048527;GO:0060918;GO:0016021;GO:0005886;GO:0005829;GO:0016887;GO:0042626;GO:0005524;GO:0010329	BP:stamen development;BP:response to far red light;BP:response to auxin;BP:response to red or far red light;BP:auxin-activated signaling pathway;BP:response to blue light;BP:anthocyanin accumulation in tissues in response to UV light;BP:auxin polar transport;BP:basipetal auxin transport;BP:acropetal auxin transport;BP:regulation of cell size;BP:formation of plant organ boundary;BP:transmembrane t…	K05658	ABCB1, CD243	map02010	ABC transporters)	COG1132	V:Defense mechanisms)	sp|Q9LJX0|AB19B_ARATH;	ABC transporter B family member 19 OS=Arabidopsis thaliana OX=3702 GN=ABCB19 PE=1 SV=1;	PF00664	ABC_membrane	ABC transporter transmembrane region
TRINITY_DN81341_c0_g1	pleiotropic drug resistance protein 1-like [Syzygium oleosum])	3.78	8.31	4.76	5.98	4.84	4.98	5.61667	5.26667	GO:0016021;GO:0016887;GO:0005524	CC:integral component of membrane;MF:ATPase activity;MF:ATP binding;	------	------	------	------	COG0842	V:Defense mechanisms)	sp|Q8GU84|AB48G_ORYSJ;	ABC transporter G family member 48 OS=Oryza sativa subsp. japonica OX=39947 GN=ABCG48 PE=3 SV=1;	PF01061	ABC2_membrane	ABC-2 type transporter
TRINITY_DN46402_c0_g1	ATP-binding cassette sub-family D member 1-like [Quercus suber])	4.99	4.93	6.83	5.1	5.52	6.96	5.58333	5.86	GO:1902001;GO:0016021;GO:0005779;GO:0042626;GO:0016887;GO:0005524	BP:fatty acid transmembrane transport;CC:integral component of membrane;CC:integral component of peroxisomal membrane;MF:ATPase activity, coupled to transmembrane movement of substances;MF:ATPase activity;MF:ATP binding;	K05677	ABCD3, PMP70	map04146;map02010	Peroxisome);ABC transporters)	COG4178	S:Function unknown)	sp|Q8T8P3|ABCD2_DICDI;	ABC transporter D family member 2 OS=Dictyostelium discoideum OX=44689 GN=abcD2 PE=3 SV=1;	PF06472	ABC_membrane_2	ABC transporter transmembrane region 2
TRINITY_DN16908_c0_g3	ABC transporter C family member 8-like [Phalaenopsis equestris])	0	0	16.5	0	0	0	5.5	0	GO:0055085;GO:0016021;GO:0016020;GO:0000325;GO:0005774;GO:0042626;GO:0016887;GO:0005524	BP:transmembrane transport;CC:integral component of membrane;CC:membrane;CC:plant-type vacuole;CC:vacuolar membrane;MF:ATPase activity, coupled to transmembrane movement of substances;MF:ATPase activity;MF:ATP binding;	K05665;K05666	ABCC1;ABCC2	map02010	ABC transporters)	COG1132	V:Defense mechanisms)	sp|Q8LGU1|AB8C_ARATH;	ABC transporter C family member 8 OS=Arabidopsis thaliana OX=3702 GN=ABCC8 PE=2 SV=3;	------	------	------
TRINITY_DN9044_c0_g1	unknown [Picea sitchensis])	4.88	6.38	5.2	5.44	3.82	4.26	5.48667	4.50667	GO:0016021;GO:0016301	CC:integral component of membrane;MF:kinase activity;	K08869	ADCK, ABC1	------	------	COG0661	C:Energy production and conversion)	sp|Q55G83|ABKC_DICDI;	Probable serine/threonine-protein kinase abkC OS=Dictyostelium discoideum OX=44689 GN=abkC PE=3 SV=1;	PF03109	ABC1	ABC1 family
TRINITY_DN8172_c0_g1	pleiotropic drug resistance protein 2-like protein [Cinnamomum micranthum f. kanehirae])	5.13	6.86	4.32	7.2	5.44	3.15	5.43667	5.26333	GO:0055085;GO:0016021;GO:0005886;GO:0042626;GO:0015419;GO:0016887;GO:0005524	BP:transmembrane transport;CC:integral component of membrane;CC:plasma membrane;MF:ATPase activity, coupled to transmembrane movement of substances;MF:ATPase-coupled sulfate transmembrane transporter activity;MF:ATPase activity;MF:ATP binding;	------	------	------	------	COG0842;COG0465	V:Defense mechanisms);O:Posttranslational modification, protein turnover, chaperones)	sp|Q7PC84|AB39G_ARATH;	ABC transporter G family member 39 OS=Arabidopsis thaliana OX=3702 GN=ABCG39 PE=3 SV=1;	PF01061;PF08370;PF00005;PF14510;PF19055;PF13555;PF13481	ABC2_membrane;PDR_assoc;ABC_tran;ABC_trans_N;ABC2_membrane_7;AAA_29;AAA_25	ABC-2 type transporter;Plant PDR ABC transporter associated;ABC transporter;ABC-transporter N-terminal;ABC-2 type transporter;P-loop containing region of AAA domain;AAA domain
TRINITY_DN55169_c0_g1	PREDICTED: uncharacterized aarF domain-containing protein kinase 1 isoform X1 [Nelumbo nucifera])	4.71	4.66	6.3	4.68	5.21	5.48	5.22333	5.12333	GO:0016301	MF:kinase activity;	K08869	ADCK, ABC1	------	------	COG0661	S:Function unknown)	sp|Q54P00|ABKD_DICDI;	Probable serine/threonine-protein kinase abkD OS=Dictyostelium discoideum OX=44689 GN=abkD PE=2 SV=1;	PF03109;PF00069;PF01163	ABC1;Pkinase;RIO1	ABC1 family;Protein kinase domain;RIO1 family
TRINITY_DN9912_c0_g1	serotransferrin-like protein [Cinnamomum micranthum f. kanehirae])	5.89	5.6	4.17	5.1	6.35	7.11	5.22	6.18667	------	------	K06569	MFI2, CD228	------	------	ENOG410XQ36	S:Function unknown)	sp|Q02942|TRF_BLADI;	Transferrin OS=Blaberus discoidalis OX=6981 PE=1 SV=1;	PF00405;PF12974	Transferrin;Phosphonate-bd	Transferrin;ABC transporter, phosphonate, periplasmic substrate-binding protein
TRINITY_DN964_c6_g1	ABC transporter C family member 8 [Cajanus cajan])	5.54	7.76	2.3	13.91	7.84	7.8	5.2	9.85	GO:0016021;GO:0042626;GO:0016887;GO:0005524	CC:integral component of membrane;MF:ATPase activity, coupled to transmembrane movement of substances;MF:ATPase activity;MF:ATP binding;	------	------	------	------	COG1132	V:Defense mechanisms)	sp|Q7GB25|AB5C_ARATH;	ABC transporter C family member 5 OS=Arabidopsis thaliana OX=3702 GN=ABCC5 PE=2 SV=2;	PF00005;PF13555	ABC_tran;AAA_29	ABC transporter;P-loop containing region of AAA domain
TRINITY_DN19796_c0_g2	hypothetical protein SORBI_3002G123200 [Sorghum bicolor])	5.01	6.53	4.03	7.8	0	0	5.19	2.6	GO:0006351;GO:0005736;GO:0005666;GO:0005665;GO:0003677;GO:0003899;GO:0008270	BP:transcription, DNA-templated;CC:DNA-directed RNA polymerase I complex;CC:DNA-directed RNA polymerase III complex;CC:DNA-directed RNA polymerase II, core complex;MF:DNA binding;MF:DNA-directed RNA polymerase activity;MF:zinc ion binding;	K03009	RPB12, POLR2K	map03020	RNA polymerase)	COG1996	K:Transcription)	sp|P48011|RPAB4_SCHPO;	DNA-directed RNA polymerases I, II, and III subunit RPABC4 OS=Schizosaccharomyces pombe;	PF03604;PF17207	DNA_RNApol_7kD;MCM_OB	DNA directed RNA polymerase, 7 kDa subunit;MCM OB domain
TRINITY_DN76966_c0_g1	ABC transporter C family member 8 [Amborella trichopoda])	2.11	10.17	2.83	3.57	8	2.54	5.03667	4.70333	GO:0055085;GO:0016021;GO:0016020;GO:0000325;GO:0005774;GO:0042626;GO:0016887;GO:0005524	BP:transmembrane transport;CC:integral component of membrane;CC:membrane;CC:plant-type vacuole;CC:vacuolar membrane;MF:ATPase activity, coupled to transmembrane movement of substances;MF:ATPase activity;MF:ATP binding;	K05665	ABCC1	map02010	ABC transporters)	COG1132	V:Defense mechanisms)	sp|Q8LGU1|AB8C_ARATH;	ABC transporter C family member 8 OS=Arabidopsis thaliana OX=3702 GN=ABCC8 PE=2 SV=3;	------	------	------
TRINITY_DN16426_c0_g1	PREDICTED: ABC transporter C family member 8-like [Prunus mume])	10.64	1.71	2.35	7.01	1.82	2.61	4.9	3.81333	GO:0055085;GO:0000325;GO:0016021;GO:0016020;GO:0005774;GO:0042626;GO:0016887;GO:0005524	BP:transmembrane transport;CC:plant-type vacuole;CC:integral component of membrane;CC:membrane;CC:vacuolar membrane;MF:ATPase activity, coupled to transmembrane movement of substances;MF:ATPase activity;MF:ATP binding;	------	------	------	------	COG1132	V:Defense mechanisms)	sp|Q8LGU1|AB8C_ARATH;	ABC transporter C family member 8 OS=Arabidopsis thaliana OX=3702 GN=ABCC8 PE=2 SV=3;	PF00005	ABC_tran	ABC transporter
TRINITY_DN2769_c0_g1	putative multidrug resistance protein [Brachypodium distachyon])	3.02	1.48	9.92	1.91	5.15	5.99	4.80667	4.35	GO:0055085;GO:0016021;GO:0042626;GO:0016887;GO:0005524	BP:transmembrane transport;CC:integral component of membrane;MF:ATPase activity, coupled to transmembrane movement of substances;MF:ATPase activity;MF:ATP binding;	K05658	ABCB1, CD243	map02010	ABC transporters)	COG1132	V:Defense mechanisms)	sp|Q9LHD1|AB15B_ARATH;	ABC transporter B family member 15 OS=Arabidopsis thaliana OX=3702 GN=ABCB15 PE=3 SV=1;	PF00005;PF00664;PF02463;PF00004;PF13191	ABC_tran;ABC_membrane;SMC_N;AAA;AAA_16	ABC transporter;ABC transporter transmembrane region;RecF/RecN/SMC N terminal domain;ATPase family associated with various cellular activities (AAA);AAA ATPase domain
TRINITY_DN10895_c0_g1	ABC transporter G family member 26 [Ziziphus jujuba])	5.05	4.74	4.55	4.38	4.55	4.25	4.78	4.39333	GO:0010152;GO:0010584;GO:0055085;GO:0016021;GO:0005886;GO:0042626;GO:0016887;GO:0005524	BP:pollen maturation;BP:pollen exine formation;BP:transmembrane transport;CC:integral component of membrane;CC:plasma membrane;MF:ATPase activity, coupled to transmembrane movement of substances;MF:ATPase activity;MF:ATP binding;	------	------	------	------	COG1131	V:Defense mechanisms)	sp|Q9LK50|AB26G_ARATH;	ABC transporter G family member 26 OS=Arabidopsis thaliana OX=3702 GN=ABCG26 PE=3 SV=2;	PF01061;PF00005;PF19055;PF13304;PF13191	ABC2_membrane;ABC_tran;ABC2_membrane_7;AAA_21;AAA_16	ABC-2 type transporter;ABC transporter;ABC-2 type transporter;AAA domain, putative AbiEii toxin, Type IV TA system;AAA ATPase domain
TRINITY_DN2107_c0_g1	predicted protein [Hordeum vulgare subsp. vulgare])	0.69	0.22	13.35	25.88	0.02	20.14	4.75333	15.3467	GO:0016887;GO:0005524	MF:ATPase activity;MF:ATP binding;	K03235	EF3, TEF3	------	------	------	------	sp|O94489|EF3_SCHPO;	Elongation factor 3 OS=Schizosaccharomyces pombe;	PF00005;PF13304;PF02463;PF13555;PF13476;PF01935	ABC_tran;AAA_21;SMC_N;AAA_29;AAA_23;DUF87	ABC transporter;AAA domain, putative AbiEii toxin, Type IV TA system;RecF/RecN/SMC N terminal domain;P-loop containing region of AAA domain;AAA domain;Helicase HerA, central domain
TRINITY_DN10956_c0_g1	hypothetical protein EZV62_016284 [Acer yangbiense])	4.04	6.79	3.35	6.21	4.68	0.09	4.72667	3.66	GO:0055085;GO:0016021;GO:0042626;GO:0016887;GO:0005524	BP:transmembrane transport;CC:integral component of membrane;MF:ATPase activity, coupled to transmembrane movement of substances;MF:ATPase activity;MF:ATP binding;	K05658	ABCB1, CD243	map02010	ABC transporters)	COG1132	V:Defense mechanisms)	sp|Q9ZR72|AB1B_ARATH;	ABC transporter B family member 1 OS=Arabidopsis thaliana OX=3702 GN=ABCB1 PE=1 SV=1;	PF00664;PF00005;PF02463;PF13555;PF13191	ABC_membrane;ABC_tran;SMC_N;AAA_29;AAA_16	ABC transporter transmembrane region;ABC transporter;RecF/RecN/SMC N terminal domain;P-loop containing region of AAA domain;AAA ATPase domain
TRINITY_DN15408_c0_g1		5.43	4.17	4.4	2.83	24.11	4.39	4.66667	10.4433	------	------	K02016	ABC.FEV.S	------	------	COG0614	L:Replication, recombination and repair)	------	------	------	------	------
TRINITY_DN26370_c0_g1	hypothetical protein FH972_021517 [Carpinus fangiana])	2.43	4.18	7.34	4.46	9.47	5.38	4.65	6.43667	GO:0016021;GO:0042626;GO:0016887;GO:0005524	CC:integral component of membrane;MF:ATPase activity, coupled to transmembrane movement of substances;MF:ATPase activity;MF:ATP binding;	K05673;K05666	ABCC4;ABCC2	map02010	ABC transporters)	COG1132	V:Defense mechanisms)	sp|P21441|MDR_LEITA;	Multidrug resistance protein OS=Leishmania tarentolae OX=5689 GN=PGPA PE=3 SV=2;	PF00005	ABC_tran	ABC transporter
TRINITY_DN26731_c0_g1	ABC transporter G family member 34 [Carica papaya])	6.33	5.43	2.01	6.02	4.29	3.73	4.59	4.68	GO:0055085;GO:0016021;GO:0005886;GO:0042626;GO:0016887;GO:0005524	BP:transmembrane transport;CC:integral component of membrane;CC:plasma membrane;MF:ATPase activity, coupled to transmembrane movement of substances;MF:ATPase activity;MF:ATP binding;	------	------	------	------	COG0842	V:Defense mechanisms)	sp|Q7PC86|AB35G_ARATH;	ABC transporter G family member 35 OS=Arabidopsis thaliana OX=3702 GN=ABCG35 PE=2 SV=1;	------	------	------
TRINITY_DN44409_c0_g1	hypothetical protein GQ55_3G081600 [Panicum hallii var. hallii])	0	0	13.71	0	0	0	4.57	0	GO:0016021;GO:0042626;GO:0016887;GO:0005524	CC:integral component of membrane;MF:ATPase activity, coupled to transmembrane movement of substances;MF:ATPase activity;MF:ATP binding;	------	------	------	------	COG4178	S:Function unknown)	sp|Q94FB9|AB1D_ARATH;	ABC transporter D family member 1 OS=Arabidopsis thaliana OX=3702 GN=ABCD1 PE=1 SV=1;	PF00005;PF13304;PF13555;PF13476	ABC_tran;AAA_21;AAA_29;AAA_23	ABC transporter;AAA domain, putative AbiEii toxin, Type IV TA system;P-loop containing region of AAA domain;AAA domain
TRINITY_DN9805_c0_g1	ABC transporter C family member 8-like isoform X2 [Ananas comosus])	5.57	6.43	1.59	4.48	6.01	8.15	4.53	6.21333	GO:0055085;GO:0016021;GO:0016020;GO:0000325;GO:0005774;GO:0042626;GO:0016887;GO:0005524	BP:transmembrane transport;CC:integral component of membrane;CC:membrane;CC:plant-type vacuole;CC:vacuolar membrane;MF:ATPase activity, coupled to transmembrane movement of substances;MF:ATPase activity;MF:ATP binding;	K05665	ABCC1	map02010	ABC transporters)	COG1132	V:Defense mechanisms)	sp|Q8LGU1|AB8C_ARATH;	ABC transporter C family member 8 OS=Arabidopsis thaliana OX=3702 GN=ABCC8 PE=2 SV=3;	PF00664;PF00005	ABC_membrane;ABC_tran	ABC transporter transmembrane region;ABC transporter
TRINITY_DN7014_c0_g1	MDR-like ABC transporter [Taxus cuspidata])	4.52	5.21	3.81	3.54	5.98	7.06	4.51333	5.52667	GO:0016021;GO:0042626;GO:0016887;GO:0005524	CC:integral component of membrane;MF:ATPase activity, coupled to transmembrane movement of substances;MF:ATPase activity;MF:ATP binding;	K05658	ABCB1, CD243	map02010	ABC transporters)	COG1132	T:Signal transduction mechanisms)	sp|Q9FWX7|AB11B_ARATH;	ABC transporter B family member 11 OS=Arabidopsis thaliana OX=3702 GN=ABCB11 PE=2 SV=1;	PF00664;PF00005;PF02463;PF13191;PF13401	ABC_membrane;ABC_tran;SMC_N;AAA_16;AAA_22	ABC transporter transmembrane region;ABC transporter;RecF/RecN/SMC N terminal domain;AAA ATPase domain;AAA domain
TRINITY_DN11766_c0_g1	pleiotropic drug resistance protein 2 [Amborella trichopoda])	7.64	2.89	3	2.67	5.77	7.17	4.51	5.20333	GO:0055085;GO:0016021;GO:0005886;GO:0042626;GO:0016887;GO:0005524	BP:transmembrane transport;CC:integral component of membrane;CC:plasma membrane;MF:ATPase activity, coupled to transmembrane movement of substances;MF:ATPase activity;MF:ATP binding;	------	------	------	------	COG0842	V:Defense mechanisms)	sp|H6WS94|PDR1_PETHY;	Pleiotropic drug resistance protein 1 OS=Petunia hybrida OX=4102 GN=PDR1 PE=2 SV=1;	PF01061;PF00005;PF08370;PF19055;PF14510;PF13481	ABC2_membrane;ABC_tran;PDR_assoc;ABC2_membrane_7;ABC_trans_N;AAA_25	ABC-2 type transporter;ABC transporter;Plant PDR ABC transporter associated;ABC-2 type transporter;ABC-transporter N-terminal;AAA domain
TRINITY_DN7983_c0_g1	protein ABC transporter 1, mitochondrial [Elaeis guineensis])	4.74	4.82	3.96	4.46	3.09	4.76	4.50667	4.10333	GO:0015996;GO:0006744;GO:0010224;GO:0016301	BP:chlorophyll catabolic process;BP:ubiquinone biosynthetic process;BP:response to UV-B;MF:kinase activity;	K08869	ADCK, ABC1	------	------	COG0661	S:Function unknown)	sp|Q9SBB2|ABC1_ARATH;	Protein ABC transporter 1, mitochondrial OS=Arabidopsis thaliana OX=3702 GN=ABC1 PE=2 SV=1;	PF03109	ABC1	ABC1 family
TRINITY_DN9061_c0_g1	ABC transporter G family member 28-like [Nymphaea colorata])	4.29	5.71	3.48	3.49	4.47	2.72	4.49333	3.56	GO:0055085;GO:0016021;GO:0005886;GO:0042626;GO:0016887;GO:0005524	BP:transmembrane transport;CC:integral component of membrane;CC:plasma membrane;MF:ATPase activity, coupled to transmembrane movement of substances;MF:ATPase activity;MF:ATP binding;	------	------	------	------	COG1131	V:Defense mechanisms)	sp|Q9FF46|AB28G_ARATH;	ABC transporter G family member 28 OS=Arabidopsis thaliana OX=3702 GN=ABCG28 PE=3 SV=1;	PF19055;PF00005;PF01061;PF03193	ABC2_membrane_7;ABC_tran;ABC2_membrane;RsgA_GTPase	ABC-2 type transporter;ABC transporter;ABC-2 type transporter;RsgA GTPase
TRINITY_DN16376_c0_g1	PREDICTED: ABC transporter G family member 11-like [Musa acuminata subsp. malaccensis])	5.01	5.29	3.16	6.51	6.64	7.55	4.48667	6.9	GO:0016021;GO:0016887;GO:0005524	CC:integral component of membrane;MF:ATPase activity;MF:ATP binding;	------	------	------	------	COG1131	S:Function unknown)	sp|Q8RXN0|AB11G_ARATH;	ABC transporter G family member 11 OS=Arabidopsis thaliana OX=3702 GN=ABCG11 PE=1 SV=1;	PF01061;PF00005;PF19055;PF13304;PF13555;PF02463;PF13191;PF03193	ABC2_membrane;ABC_tran;ABC2_membrane_7;AAA_21;AAA_29;SMC_N;AAA_16;RsgA_GTPase	ABC-2 type transporter;ABC transporter;ABC-2 type transporter;AAA domain, putative AbiEii toxin, Type IV TA system;P-loop containing region of AAA domain;RecF/RecN/SMC N terminal domain;AAA ATPase domain;RsgA GTPase
TRINITY_DN58510_c0_g2	LOW QUALITY PROTEIN: ABC transporter C family member 8-like [Hevea brasiliensis])	2.59	9.46	1.21	12.89	2.53	14.98	4.42	10.1333	GO:0055085;GO:0016021;GO:0016020;GO:0000325;GO:0005774;GO:0042626;GO:0016887;GO:0005524	BP:transmembrane transport;CC:integral component of membrane;CC:membrane;CC:plant-type vacuole;CC:vacuolar membrane;MF:ATPase activity, coupled to transmembrane movement of substances;MF:ATPase activity;MF:ATP binding;	K05665	ABCC1	map02010	ABC transporters)	------	------	sp|Q8LGU1|AB8C_ARATH;	ABC transporter C family member 8 OS=Arabidopsis thaliana OX=3702 GN=ABCC8 PE=2 SV=3;	PF00664	ABC_membrane	ABC transporter transmembrane region
TRINITY_DN63202_c1_g1	hypothetical protein EJB05_44558 [Eragrostis curvula])	2.6	10.59	0	1.53	5.03	0	4.39667	2.18667	GO:0016021;GO:0016887;GO:0005524;GO:0015419	CC:integral component of membrane;MF:ATPase activity;MF:ATP binding;MF:ATPase-coupled sulfate transmembrane transporter activity;	------	------	------	------	COG0842	L:Replication, recombination and repair)	sp|Q94A18|AB29G_ARATH;	ABC transporter G family member 29 OS=Arabidopsis thaliana OX=3702 GN=ABCG29 PE=2 SV=2;	------	------	------
TRINITY_DN14903_c0_g1	hypothetical protein BHM03_00006046 [Ensete ventricosum])	3.8	7.28	1.7	6.41	5.78	5.01	4.26	5.73333	GO:0052544;GO:0016045;GO:0006898;GO:0042742;GO:0010359;GO:0016021;GO:0005886;GO:0005768;GO:0005524;GO:0004674;GO:0004672;GO:0042802	BP:defense response by callose deposition in cell wall;BP:detection of bacterium;BP:receptor-mediated endocytosis;BP:defense response to bacterium;BP:regulation of anion channel activity;CC:integral component of membrane;CC:plasma membrane;CC:endosome;MF:ATP binding;MF:protein serine/threonine kinase activity;MF:protein kinase activity;MF:identical protein binding;	K13420	FLS2	map04016;map04626	MAPK signaling pathway - plant);Plant-pathogen interaction)	ENOG410YBN4;COG4886	T:Signal transduction mechanisms);	sp|Q9LYN8|EMS1_ARATH;	Leucine-rich repeat receptor protein kinase EMS1 OS=Arabidopsis thaliana OX=3702 GN=EMS1 PE=1 SV=1;	PF00069;PF07714;PF01163;PF01636;PF03109	Pkinase;PK_Tyr_Ser-Thr;RIO1;APH;ABC1	Protein kinase domain;Protein tyrosine and serine/threonine kinase;RIO1 family;Phosphotransferase enzyme family;ABC1 family
TRINITY_DN63146_c0_g3	putative xenobiotic-transporting ATPase [Medicago truncatula])	3.09	7.78	1.89	0	0.98	3.22	4.25333	1.4	GO:0055085;GO:0016021;GO:0016020;GO:0000325;GO:0005774;GO:0042626;GO:0016887;GO:0005524	BP:transmembrane transport;CC:integral component of membrane;CC:membrane;CC:plant-type vacuole;CC:vacuolar membrane;MF:ATPase activity, coupled to transmembrane movement of substances;MF:ATPase activity;MF:ATP binding;	K05665	ABCC1	map02010	ABC transporters)	COG1132	V:Defense mechanisms)	sp|Q8LGU1|AB8C_ARATH;	ABC transporter C family member 8 OS=Arabidopsis thaliana OX=3702 GN=ABCC8 PE=2 SV=3;	------	------	------
TRINITY_DN16957_c0_g1	ABC transporter G family member 39-like protein [Cinnamomum micranthum f. kanehirae])	6.88	4.11	1.72	3.16	4.82	5.25	4.23667	4.41	GO:0016021;GO:0016887;GO:0005524	CC:integral component of membrane;MF:ATPase activity;MF:ATP binding;	------	------	------	------	COG0842	V:Defense mechanisms)	sp|O24367|TUR2_SPIPO;	Pleiotropic drug resistance protein TUR2 OS=Spirodela polyrhiza OX=29656 GN=TUR2 PE=1 SV=1;	PF19055	ABC2_membrane_7	ABC-2 type transporter
TRINITY_DN18691_c1_g1	Pleiotropic drug resistance protein 1 [Cajanus cajan])	3.41	5.98	3.29	6.83	4.39	5.52	4.22667	5.58	GO:0016021;GO:0016887;GO:0005524	CC:integral component of membrane;MF:ATPase activity;MF:ATP binding;	------	------	------	------	COG0842;COG0465;COG1131	V:Defense mechanisms);O:Posttranslational modification, protein turnover, chaperones);O:Posttranslational modification, protein turnover, chaperones)	sp|Q8GU92|AB35G_ORYSJ;	ABC transporter G family member 35 OS=Oryza sativa subsp. japonica OX=39947 GN=ABCG35 PE=3 SV=1;	PF01061	ABC2_membrane	ABC-2 type transporter
TRINITY_DN16067_c1_g1	ABC transporter C family member 4 [Arachis duranensis])	7.45	4.84	0.35	1.02	0.95	3.96	4.21333	1.97667	GO:0055085;GO:0016021;GO:0016020;GO:0000325;GO:0005774;GO:0042626;GO:0016887;GO:0005524	BP:transmembrane transport;CC:integral component of membrane;CC:membrane;CC:plant-type vacuole;CC:vacuolar membrane;MF:ATPase activity, coupled to transmembrane movement of substances;MF:ATPase activity;MF:ATP binding;	K05665;K05666	ABCC1;ABCC2	map02010	ABC transporters)	COG1132	V:Defense mechanisms)	sp|Q7DM58|AB4C_ARATH;	ABC transporter C family member 4 OS=Arabidopsis thaliana OX=3702 GN=ABCC4 PE=1 SV=2;	------	------	------
TRINITY_DN53268_c0_g1	hypothetical protein AQUCO_00200550v1 [Aquilegia coerulea])	1.23	11.25	0	4.33	3.16	0	4.16	2.49667	GO:0055085;GO:0016021;GO:0042626;GO:0016887;GO:0005524	BP:transmembrane transport;CC:integral component of membrane;MF:ATPase activity, coupled to transmembrane movement of substances;MF:ATPase activity;MF:ATP binding;	K05658	ABCB1, CD243	map02010	ABC transporters)	COG1132	V:Defense mechanisms)	sp|Q9LJX0|AB19B_ARATH;	ABC transporter B family member 19 OS=Arabidopsis thaliana OX=3702 GN=ABCB19 PE=1 SV=1;	------	------	------
TRINITY_DN44001_c0_g1	pleiotropic drug resistance protein 2-like [Malus domestica])	4.4	4.62	3.4	12.16	7.97	6.44	4.14	8.85667	GO:0016021;GO:0016887;GO:0005524	CC:integral component of membrane;MF:ATPase activity;MF:ATP binding;	------	------	------	------	COG0842;COG1131	V:Defense mechanisms);	sp|Q8GU88|AB39G_ORYSJ;	ABC transporter G family member 39 OS=Oryza sativa subsp. japonica OX=39947 GN=ABCG39 PE=3 SV=1;	PF00005;PF13304;PF13555;PF03193	ABC_tran;AAA_21;AAA_29;RsgA_GTPase	ABC transporter;AAA domain, putative AbiEii toxin, Type IV TA system;P-loop containing region of AAA domain;RsgA GTPase
TRINITY_DN45944_c0_g3	hypothetical protein FH972_023597 [Carpinus fangiana])	12.39	0	0	0	0	1.04	4.13	0.346667	GO:0055085;GO:0016021;GO:0005886;GO:0042626;GO:0016887;GO:0005524	BP:transmembrane transport;CC:integral component of membrane;CC:plasma membrane;MF:ATPase activity, coupled to transmembrane movement of substances;MF:ATPase activity;MF:ATP binding;	K05658	ABCB1, CD243	map02010	ABC transporters)	------	------	sp|F2PRR1|MDR2_TRIEC;	ABC multidrug transporter MDR2 OS=Trichophyton equinum;	PF00005;PF00664;PF02463;PF13304;PF00004;PF09818;PF13401;PF13191	ABC_tran;ABC_membrane;SMC_N;AAA_21;AAA;ABC_ATPase;AAA_22;AAA_16	ABC transporter;ABC transporter transmembrane region;RecF/RecN/SMC N terminal domain;AAA domain, putative AbiEii toxin, Type IV TA system;ATPase family associated with various cellular activities (AAA);Predicted ATPase of the ABC class;AAA domain;AAA ATPase domain
TRINITY_DN22473_c0_g1	ABCB2 protein [Pinus radiata])	4.74	5.25	2.23	3.02	4.64	4.17	4.07333	3.94333	GO:0016021;GO:0042626;GO:0016887;GO:0005524	CC:integral component of membrane;MF:ATPase activity, coupled to transmembrane movement of substances;MF:ATPase activity;MF:ATP binding;	K05658	ABCB1, CD243	map02010	ABC transporters)	COG1132	V:Defense mechanisms)	sp|Q9LJX0|AB19B_ARATH;	ABC transporter B family member 19 OS=Arabidopsis thaliana OX=3702 GN=ABCB19 PE=1 SV=1;	PF00664;PF00005;PF02463;PF13191;PF13555;PF13401	ABC_membrane;ABC_tran;SMC_N;AAA_16;AAA_29;AAA_22	ABC transporter transmembrane region;ABC transporter;RecF/RecN/SMC N terminal domain;AAA ATPase domain;P-loop containing region of AAA domain;AAA domain
TRINITY_DN35637_c0_g2	unnamed protein product [Triticum turgidum subsp. durum])	5.64	3.62	2.64	5.61	4.26	3.99	3.96667	4.62	GO:0016021;GO:0042626;GO:0016887;GO:0005524	CC:integral component of membrane;MF:ATPase activity, coupled to transmembrane movement of substances;MF:ATPase activity;MF:ATP binding;	K05658	ABCB1, CD243	map02010	ABC transporters)	COG1132	S:Function unknown)	sp|Q9FWX8|AB12B_ARATH;	ABC transporter B family member 12 OS=Arabidopsis thaliana OX=3702 GN=ABCB12 PE=2 SV=2;	PF00664	ABC_membrane	ABC transporter transmembrane region
TRINITY_DN21214_c0_g1	Receptor-like protein kinase [Nymphaea thermarum])	3.27	4.48	3.8	4.52	5.92	4.04	3.85	4.82667	GO:0016021;GO:0005886;GO:0004674;GO:0004672;GO:0005524	CC:integral component of membrane;CC:plasma membrane;MF:protein serine/threonine kinase activity;MF:protein kinase activity;MF:ATP binding;	------	------	------	------	COG4886	S:Function unknown)	sp|Q9SGP2|HSL1_ARATH;	Receptor-like protein kinase HSL1 OS=Arabidopsis thaliana OX=3702 GN=HSL1 PE=2 SV=1;	PF00069;PF07714;PF03109	Pkinase;PK_Tyr_Ser-Thr;ABC1	Protein kinase domain;Protein tyrosine and serine/threonine kinase;ABC1 family
TRINITY_DN29039_c0_g1	PREDICTED: ABC transporter C family member 8-like [Vigna angularis])	2.02	5.1	3.82	1.94	5.01	2.3	3.64667	3.08333	GO:0016021;GO:0042626;GO:0016887;GO:0005524	CC:integral component of membrane;MF:ATPase activity, coupled to transmembrane movement of substances;MF:ATPase activity;MF:ATP binding;	------	------	------	------	COG1132	V:Defense mechanisms)	------	------	------	------	------
TRINITY_DN11164_c0_g1	UPF0014 membrane protein STAR2 [Momordica charantia])	3.2	3.82	3.75	3.23	4.45	3.94	3.59	3.87333	GO:0016021	CC:integral component of membrane;	K02069	ABC.X2.P	------	------	COG0390	S:Function unknown)	sp|Q9ZUT3|ALS3_ARATH;	Protein ALUMINUM SENSITIVE 3 OS=Arabidopsis thaliana OX=3702 GN=ALS3 PE=1 SV=1;	PF03649	UPF0014	Uncharacterised protein family (UPF0014)
TRINITY_DN14120_c0_g1	MDR-like ABC transporter [Ginkgo biloba])	3.85	2.78	4.09	3.09	2.49	4.93	3.57333	3.50333	GO:0055085;GO:0016021;GO:0042626;GO:0016887;GO:0005524	BP:transmembrane transport;CC:integral component of membrane;MF:ATPase activity, coupled to transmembrane movement of substances;MF:ATPase activity;MF:ATP binding;	K05658	ABCB1, CD243	map02010	ABC transporters)	COG1132	V:Defense mechanisms)	sp|Q8LPK2|AB2B_ARATH;	ABC transporter B family member 2 OS=Arabidopsis thaliana OX=3702 GN=ABCB2 PE=1 SV=3;	PF00664;PF00005;PF02463;PF13555;PF13191	ABC_membrane;ABC_tran;SMC_N;AAA_29;AAA_16	ABC transporter transmembrane region;ABC transporter;RecF/RecN/SMC N terminal domain;P-loop containing region of AAA domain;AAA ATPase domain
TRINITY_DN37232_c0_g1	LOW QUALITY PROTEIN: pleiotropic drug resistance protein 1-like [Syzygium oleosum])	2.84	4.95	2.8	3.98	2.7	3.29	3.53	3.32333	------	------	------	------	------	------	------	------	sp|Q7FMW4|AB38G_ORYSJ;	ABC transporter G family member 38 OS=Oryza sativa subsp. japonica OX=39947 GN=ABCG38 PE=3 SV=1;	------	------	------
TRINITY_DN44132_c0_g3	ABC transporter C family member 4 [Morus notabilis])	2.7	6.77	1.1	3.18	14.43	5.08	3.52333	7.56333	GO:0055085;GO:0016021;GO:0016020;GO:0000325;GO:0005774;GO:0042626;GO:0016887;GO:0032440;GO:0005524	BP:transmembrane transport;CC:integral component of membrane;CC:membrane;CC:plant-type vacuole;CC:vacuolar membrane;MF:ATPase activity, coupled to transmembrane movement of substances;MF:ATPase activity;MF:2-alkenal reductase [NA;MF:ATP binding;	pbar;K05665	;ABCC1	map02010	ABC transporters)	COG1132	V:Defense mechanisms)	sp|Q9LZJ5|AB14C_ARATH;	ABC transporter C family member 14 OS=Arabidopsis thaliana OX=3702 GN=ABCC14 PE=1 SV=1;	PF00005	ABC_tran	ABC transporter
TRINITY_DN12175_c0_g1	Multidrug resistance protein ABC transporter family [Zostera marina])	3.43	3.4	3.67	3.35	5.6	1.88	3.5	3.61	GO:0055085;GO:0016021;GO:0016020;GO:0000325;GO:0005774;GO:0042626;GO:0016887;GO:0005524	BP:transmembrane transport;CC:integral component of membrane;CC:membrane;CC:plant-type vacuole;CC:vacuolar membrane;MF:ATPase activity, coupled to transmembrane movement of substances;MF:ATPase activity;MF:ATP binding;	------	------	------	------	------	------	sp|Q7GB25|AB5C_ARATH;	ABC transporter C family member 5 OS=Arabidopsis thaliana OX=3702 GN=ABCC5 PE=2 SV=2;	------	------	------
TRINITY_DN28458_c0_g2	unnamed protein product [Digitaria exilis])	3.77	4.4	2.3	5.62	8.79	1.95	3.49	5.45333	GO:0016021;GO:0042626;GO:0016887;GO:0005524	CC:integral component of membrane;MF:ATPase activity, coupled to transmembrane movement of substances;MF:ATPase activity;MF:ATP binding;	K05665;K05666	ABCC1;ABCC2	map02010	ABC transporters)	COG1132	V:Defense mechanisms)	sp|Q8LGU1|AB8C_ARATH;	ABC transporter C family member 8 OS=Arabidopsis thaliana OX=3702 GN=ABCC8 PE=2 SV=3;	------	------	------
TRINITY_DN72557_c0_g1	ATP-binding cassette sub-family C member 4a [Crocus sativus])	1.69	8.65	0	0	0	5.37	3.44667	1.79	GO:0030007;GO:1901527;GO:0009651;GO:0055085;GO:0016021;GO:0016020;GO:0000325;GO:0005623;GO:0005774;GO:0042626;GO:0008281;GO:0016887;GO:0005524	BP:cellular potassium ion homeostasis;BP:abscisic acid-activated signaling pathway involved in stomatal movement;BP:response to salt stress;BP:transmembrane transport;CC:integral component of membrane;CC:membrane;CC:plant-type vacuole;CC:cell;CC:vacuolar membrane;MF:ATPase activity, coupled to transmembrane movement of substances;MF:sulfonylurea receptor activity;MF:ATPase activity;MF:ATP binding;	K05665;cit	ABCC1;	map02010	ABC transporters)	COG1132	V:Defense mechanisms)	sp|Q7GB25|AB5C_ARATH;	ABC transporter C family member 5 OS=Arabidopsis thaliana OX=3702 GN=ABCC5 PE=2 SV=2;	------	------	------
TRINITY_DN11602_c0_g1		3.8	3.35	2.78	3.1	3.59	3.37	3.31	3.35333	------	------	------	------	------	------	------	------	------	------	PF00350;PF00005;PF03193;PF16471;PF08961;PF00170;PF06005;PF04977	Dynamin_N;ABC_tran;RsgA_GTPase;JIP_LZII;NRBF2;bZIP_1;ZapB;DivIC	Dynamin family;ABC transporter;RsgA GTPase;JNK-interacting protein leucine zipper II;Nuclear receptor-binding factor 2, autophagy regulator;bZIP transcription factor;Cell division protein ZapB;Septum formation initiator
TRINITY_DN32983_c0_g1	unknown [Picea sitchensis])	3.57	3.34	2.71	1.06	1.47	6.87	3.20667	3.13333	GO:0055085;GO:0016021;GO:0005886;GO:0042626;GO:0016887;GO:0005524	BP:transmembrane transport;CC:integral component of membrane;CC:plasma membrane;MF:ATPase activity, coupled to transmembrane movement of substances;MF:ATPase activity;MF:ATP binding;	------	------	------	------	------	------	sp|Q9LK50|AB26G_ARATH;	ABC transporter G family member 26 OS=Arabidopsis thaliana OX=3702 GN=ABCG26 PE=3 SV=2;	------	------	------
TRINITY_DN70622_c0_g3	hypothetical protein FH972_023675 [Carpinus fangiana])	2.53	5.52	1.36	4.03	0	0	3.13667	1.34333	GO:0030001;GO:0016021;GO:0005886;GO:0016887;GO:0046872;GO:0005524	BP:metal ion transport;CC:integral component of membrane;CC:plasma membrane;MF:ATPase activity;MF:metal ion binding;MF:ATP binding;	K06185	ABCF2	------	------	COG0488	E:Amino acid transport and metabolism)	sp|O42943|YBP8_SCHPO;	Uncharacterized ABC transporter ATP-binding protein C16H5.08c OS=Schizosaccharomyces pombe;	PF00005;PF12848;PF13304;PF13555;PF03193	ABC_tran;ABC_tran_Xtn;AAA_21;AAA_29;RsgA_GTPase	ABC transporter;ABC transporter;AAA domain, putative AbiEii toxin, Type IV TA system;P-loop containing region of AAA domain;RsgA GTPase
TRINITY_DN84918_c0_g1	ABC transporter C family member 8 [Cajanus cajan])	1.55	5.23	2.53	1.22	5.14	2.13	3.10333	2.83	GO:0016021;GO:0042626;GO:0016887;GO:0005524	CC:integral component of membrane;MF:ATPase activity, coupled to transmembrane movement of substances;MF:ATPase activity;MF:ATP binding;	K05666	ABCC2	map02010	ABC transporters)	COG1132	V:Defense mechanisms)	sp|Q8LGU1|AB8C_ARATH;	ABC transporter C family member 8 OS=Arabidopsis thaliana OX=3702 GN=ABCC8 PE=2 SV=3;	PF00005	ABC_tran	ABC transporter
TRINITY_DN17681_c0_g1	hypothetical protein B456_011G071700 [Gossypium raimondii])	3.35	3.81	1.73	3.03	3.6	1.74	2.96333	2.79	GO:0016021;GO:0016887;GO:0005524	CC:integral component of membrane;MF:ATPase activity;MF:ATP binding;	------	------	------	------	COG0842	V:Defense mechanisms)	sp|Q94A18|AB29G_ARATH;	ABC transporter G family member 29 OS=Arabidopsis thaliana OX=3702 GN=ABCG29 PE=2 SV=2;	PF01061	ABC2_membrane	ABC-2 type transporter
TRINITY_DN13291_c0_g1	ABC transporter C family member 8 [Momordica charantia])	0.48	5.58	2.68	3.89	0.27	0.53	2.91333	1.56333	GO:0055085;GO:0016021;GO:0016020;GO:0000325;GO:0005774;GO:0042626;GO:0016887;GO:0005524	BP:transmembrane transport;CC:integral component of membrane;CC:membrane;CC:plant-type vacuole;CC:vacuolar membrane;MF:ATPase activity, coupled to transmembrane movement of substances;MF:ATPase activity;MF:ATP binding;	ppp;K05665	;ABCC1	map02010	ABC transporters)	COG1132	V:Defense mechanisms)	sp|Q8LGU1|AB8C_ARATH;	ABC transporter C family member 8 OS=Arabidopsis thaliana OX=3702 GN=ABCC8 PE=2 SV=3;	PF00664	ABC_membrane	ABC transporter transmembrane region
TRINITY_DN16837_c2_g1	hypothetical protein DAI22_09g208500 [Oryza sativa Japonica Group])	2.53	0	6.19	0	0	5.4	2.90667	1.8	GO:0005524;GO:0016887	MF:ATP binding;MF:ATPase activity;	K06185	ABCF2	------	------	COG0488	S:Function unknown)	sp|Q2KJA2|ABCF2_BOVIN;	ATP-binding cassette sub-family F member 2 OS=Bos taurus OX=9913 GN=ABCF2 PE=2 SV=1;	PF00005	ABC_tran	ABC transporter
TRINITY_DN13867_c0_g1	ABC transporter B family member 19 [Zea mays])	2.03	4.18	2.49	2.96	0	4.32	2.9	2.42667	GO:0016021;GO:0005887;GO:0005886;GO:0042626;GO:0016887;GO:0005524	CC:integral component of membrane;CC:integral component of plasma membrane;CC:plasma membrane;MF:ATPase activity, coupled to transmembrane movement of substances;MF:ATPase activity;MF:ATP binding;	K05658	ABCB1, CD243	map02010	ABC transporters)	COG1132	V:Defense mechanisms)	sp|Q9LJX0|AB19B_ARATH;	ABC transporter B family member 19 OS=Arabidopsis thaliana OX=3702 GN=ABCB19 PE=1 SV=1;	PF00005;PF13191	ABC_tran;AAA_16	ABC transporter;AAA ATPase domain
TRINITY_DN17466_c0_g1		0.37	5.94	2.31	8.23	0.81	1.31	2.87333	3.45	------	------	------	------	------	------	ENOG41125KF	S:Function unknown)	sp|Q9QZ85|IIGP1_MOUSE;	Interferon-inducible GTPase 1 OS=Mus musculus OX=10090 GN=Iigp1 PE=1 SV=2;	PF05049;PF01926;PF08477;PF03193;PF00005	IIGP;MMR_HSR1;Roc;RsgA_GTPase;ABC_tran	Interferon-inducible GTPase (IIGP);50S ribosome-binding GTPase;Ras of Complex, Roc, domain of DAPkinase;RsgA GTPase;ABC transporter
TRINITY_DN23518_c0_g1	PREDICTED: ABC transporter A family member 7-like [Ipomoea nil])	2.79	2.7	2.9	2.55	2.81	3.3	2.79667	2.88667	GO:0006869;GO:0043231;GO:0016021;GO:0005319;GO:0042626;GO:0016887;GO:0005524	BP:lipid transport;CC:intracellular membrane-bounded organelle;CC:integral component of membrane;MF:lipid transporter activity;MF:ATPase activity, coupled to transmembrane movement of substances;MF:ATPase activity;MF:ATP binding;	------	------	------	------	COG1131;ENOG410XR3G	V:Defense mechanisms);S:Function unknown)	sp|Q8LPK0|AB8A_ARATH;	ABC transporter A family member 8 OS=Arabidopsis thaliana OX=3702 GN=ABCA8 PE=2 SV=3;	PF00005;PF13304	ABC_tran;AAA_21	ABC transporter;AAA domain, putative AbiEii toxin, Type IV TA system
TRINITY_DN2547_c7_g1	ABC transporter C family member 4 [Spatholobus suberectus])	3.36	3.26	1.77	1.46	4.73	7.16	2.79667	4.45	GO:0055085;GO:0005794;GO:0005783;GO:0016021;GO:0016020;GO:0000325;GO:0005774;GO:0042626;GO:0050662;GO:0016887;GO:0005524	BP:transmembrane transport;CC:Golgi apparatus;CC:endoplasmic reticulum;CC:integral component of membrane;CC:membrane;CC:plant-type vacuole;CC:vacuolar membrane;MF:ATPase activity, coupled to transmembrane movement of substances;MF:coenzyme binding;MF:ATPase activity;MF:ATP binding;	K05666	ABCC2	map02010	ABC transporters)	COG1132	V:Defense mechanisms)	sp|Q7GB25|AB5C_ARATH;	ABC transporter C family member 5 OS=Arabidopsis thaliana OX=3702 GN=ABCC5 PE=2 SV=2;	------	------	------
TRINITY_DN62491_c0_g2		4.98	3.4	0	0	4.32	0	2.79333	1.44	------	------	K05665;K05670	ABCC1;ABCC13	map02010	ABC transporters)	COG1132	V:Defense mechanisms)	sp|A2XCD4|AB13C_ORYSI;	ABC transporter C family member 13 OS=Oryza sativa subsp. indica OX=39946 GN=ABCC13 PE=3 SV=1;	------	------	------
TRINITY_DN13898_c0_g1	ABC transporter C family member 8-like isoform X2 [Papaver somniferum])	0.46	7.27	0.56	0.55	1.69	3.75	2.76333	1.99667	GO:0016021;GO:0042626;GO:0016887;GO:0005524	CC:integral component of membrane;MF:ATPase activity, coupled to transmembrane movement of substances;MF:ATPase activity;MF:ATP binding;	ppp;K05665	;ABCC1	map02010	ABC transporters)	COG1132	V:Defense mechanisms)	sp|Q7GB25|AB5C_ARATH;	ABC transporter C family member 5 OS=Arabidopsis thaliana OX=3702 GN=ABCC5 PE=2 SV=2;	------	------	------
TRINITY_DN31934_c0_g2	hypothetical protein BRADI_5g19787v3 [Brachypodium distachyon])	3.41	2.31	2.53	1.76	4.46	2.89	2.75	3.03667	GO:0016021;GO:0042626;GO:0016887;GO:0005524	CC:integral component of membrane;MF:ATPase activity, coupled to transmembrane movement of substances;MF:ATPase activity;MF:ATP binding;	ppp;K05665	;ABCC1	map02010	ABC transporters)	COG1132	V:Defense mechanisms)	sp|Q8LGU1|AB8C_ARATH;	ABC transporter C family member 8 OS=Arabidopsis thaliana OX=3702 GN=ABCC8 PE=2 SV=3;	------	------	------
TRINITY_DN80480_c0_g1	metal resistance protein YCF1-like [Quercus suber])	0	8.24	0	0	0	0	2.74667	0	GO:0055085;GO:0016021;GO:0016020;GO:0000325;GO:0005774;GO:0042626;GO:0016887;GO:0005524	BP:transmembrane transport;CC:integral component of membrane;CC:membrane;CC:plant-type vacuole;CC:vacuolar membrane;MF:ATPase activity, coupled to transmembrane movement of substances;MF:ATPase activity;MF:ATP binding;	------	------	------	------	------	------	sp|Q9P5N0|ABC3_SCHPO;	ATP-binding cassette transporter abc3 OS=Schizosaccharomyces pombe;	PF00005	ABC_tran	ABC transporter
TRINITY_DN3250_c0_g4	unnamed protein product [Arabis nemorensis])	2.46	5.23	0.54	3.79	0	0	2.74333	1.26333	GO:0055085;GO:0016021;GO:0005886;GO:0042626;GO:0016887;GO:0005524	BP:transmembrane transport;CC:integral component of membrane;CC:plasma membrane;MF:ATPase activity, coupled to transmembrane movement of substances;MF:ATPase activity;MF:ATP binding;	------	------	------	------	COG1131	S:Function unknown)	sp|Q7XA72|AB21G_ARATH;	ABC transporter G family member 21 OS=Arabidopsis thaliana OX=3702 GN=ABCG21 PE=2 SV=2;	PF01061;PF00005;PF19055;PF03215;PF13191;PF13401	ABC2_membrane;ABC_tran;ABC2_membrane_7;Rad17;AAA_16;AAA_22	ABC-2 type transporter;ABC transporter;ABC-2 type transporter;Rad17 P-loop domain;AAA ATPase domain;AAA domain
TRINITY_DN34928_c0_g2	hypothetical protein FH972_023382 [Carpinus fangiana])	1.76	5.3	1.09	2.16	1.55	0	2.71667	1.23667	GO:0015916;GO:0010030;GO:0006744;GO:1902001;GO:0046861;GO:0016021;GO:0005779;GO:0042626;GO:0016887;GO:0005524	BP:fatty-acyl-CoA transport;BP:positive regulation of seed germination;BP:ubiquinone biosynthetic process;BP:fatty acid transmembrane transport;CC:glyoxysomal membrane;CC:integral component of membrane;CC:integral component of peroxisomal membrane;MF:ATPase activity, coupled to transmembrane movement of substances;MF:ATPase activity;MF:ATP binding;	K05677	ABCD3, PMP70	map04146;map02010	Peroxisome);ABC transporters)	COG4178	S:Function unknown)	sp|P55096|ABCD3_MOUSE;	ATP-binding cassette sub-family D member 3 OS=Mus musculus OX=10090 GN=Abcd3 PE=1 SV=2;	PF06472;PF00005;PF13304	ABC_membrane_2;ABC_tran;AAA_21	ABC transporter transmembrane region 2;ABC transporter;AAA domain, putative AbiEii toxin, Type IV TA system
TRINITY_DN58903_c0_g1	hypothetical protein FH972_026045 [Carpinus fangiana])	0	7.97	0	0	0	0	2.65667	0	GO:0006260;GO:0016021;GO:0005634;GO:0005524;GO:0004672	BP:DNA replication;CC:integral component of membrane;CC:nucleus;MF:ATP binding;MF:protein kinase activity;	K08869	ADCK, ABC1	------	------	COG0661	S:Function unknown)	sp|O60111|MCP2L_SCHPO;	ABC1 family protein MCP2 homolog OS=Schizosaccharomyces pombe;	------	------	------
TRINITY_DN18691_c0_g1	hypothetical protein G4B88_022810 [Cannabis sativa])	3.14	2.35	2.47	1.48	8.17	0.48	2.65333	3.37667	GO:0016021;GO:0016887;GO:0005524	CC:integral component of membrane;MF:ATPase activity;MF:ATP binding;	------	------	------	------	COG0842	V:Defense mechanisms)	sp|Q7PC80|AB34G_ORYSJ;	ABC transporter G family member 34 OS=Oryza sativa subsp. japonica OX=39947 GN=ABCG34 PE=3 SV=1;	PF08370	PDR_assoc	Plant PDR ABC transporter associated
TRINITY_DN24747_c0_g1	hypothetical protein G4B88_000637 [Cannabis sativa])	2.95	2.61	2.4	2.43	2.91	2.98	2.65333	2.77333	GO:0016021;GO:0004674;GO:0005524	CC:integral component of membrane;MF:protein serine/threonine kinase activity;MF:ATP binding;	K13420;K20718	FLS2;ER	map04016;map04626	MAPK signaling pathway - plant);Plant-pathogen interaction)	COG4886	S:Function unknown)	sp|Q9ZUI0|Y2241_ARATH;	Putative leucine-rich repeat receptor-like serine/threonine-protein kinase At2g24130 OS=Arabidopsis thaliana OX=3702 GN=At2g24130 PE=3 SV=1;	PF00069;PF07714;PF03109	Pkinase;PK_Tyr_Ser-Thr;ABC1	Protein kinase domain;Protein tyrosine and serine/threonine kinase;ABC1 family
TRINITY_DN19875_c0_g1	ABC transporter A family member 2-like isoform X1 [Punica granatum])	3.72	4.18	0	12.63	9.53	7.33	2.63333	9.83	GO:0006869;GO:0043231;GO:0016021;GO:0005319;GO:0042626;GO:0016887;GO:0005524	BP:lipid transport;CC:intracellular membrane-bounded organelle;CC:integral component of membrane;MF:lipid transporter activity;MF:ATPase activity, coupled to transmembrane movement of substances;MF:ATPase activity;MF:ATP binding;	------	------	------	------	ENOG410XXUP;COG1131	S:Function unknown);	sp|Q9FKF2|AB11A_ARATH;	ABC transporter A family member 11 OS=Arabidopsis thaliana OX=3702 GN=ABCA11 PE=3 SV=1;	------	------	------
TRINITY_DN44416_c0_g1	DNA-directed RNA polymerases II, IV and V subunit 6A isoform X1 [Cinnamomum micranthum f. kanehirae])	3.22	3.68	0.97	0.93	0.16	0	2.62333	0.363333	GO:0006351;GO:0005736;GO:0005665;GO:0005666;GO:0003677;GO:0003899	BP:transcription, DNA-templated;CC:DNA-directed RNA polymerase I complex;CC:DNA-directed RNA polymerase II, core complex;CC:DNA-directed RNA polymerase III complex;MF:DNA binding;MF:DNA-directed RNA polymerase activity;	K03014	RPB6, POLR2F	map03020	RNA polymerase)	COG1758	K:Transcription)	sp|P20435|RPAB2_YEAST;	DNA-directed RNA polymerases I, II, and III subunit RPABC2 OS=Saccharomyces cerevisiae;	PF01192	RNA_pol_Rpb6	RNA polymerase Rpb6
TRINITY_DN16227_c0_g1	ABC transporter G family member 31 [Ricinus communis])	2.85	2.64	2.36	0.97	1.67	6.19	2.61667	2.94333	GO:0055085;GO:0016021;GO:0005886;GO:0042626;GO:0016887;GO:0005524	BP:transmembrane transport;CC:integral component of membrane;CC:plasma membrane;MF:ATPase activity, coupled to transmembrane movement of substances;MF:ATPase activity;MF:ATP binding;	------	------	------	------	COG0842	V:Defense mechanisms)	sp|Q7PC88|AB31G_ARATH;	ABC transporter G family member 31 OS=Arabidopsis thaliana OX=3702 GN=ABCG31 PE=1 SV=1;	PF01061	ABC2_membrane	ABC-2 type transporter
TRINITY_DN63562_c0_g1	PREDICTED: ABC transporter E family member 2 [Erythranthe guttata])	0	7.84	0	0	0	0	2.61333	0	GO:0006415;GO:0000054;GO:0006413;GO:0016887;GO:0005506;GO:0043024;GO:0005524	BP:translational termination;BP:ribosomal subunit export from nucleus;BP:translational initiation;MF:ATPase activity;MF:iron ion binding;MF:ribosomal small subunit binding;MF:ATP binding;	K06174	ABCE1, Rli1	------	------	COG1245	S:Function unknown)	sp|P61221|ABCE1_HUMAN;	ATP-binding cassette sub-family E member 1 OS=Homo sapiens OX=9606 GN=ABCE1 PE=1 SV=1;	PF04068;PF00037;PF12837;PF13237;PF12797;PF12838;PF14697;PF13187	RLI;Fer4;Fer4_6;Fer4_10;Fer4_2;Fer4_7;Fer4_21;Fer4_9	Possible Fer4-like domain in RNase L inhibitor, RLI;4Fe-4S binding domain;4Fe-4S binding domain;4Fe-4S dicluster domain;4Fe-4S binding domain;4Fe-4S dicluster domain;4Fe-4S dicluster domain;4Fe-4S dicluster domain
TRINITY_DN47964_c0_g1	ATP-binding cassette subfamily C member 8 [Artemisia annua])	7.8	0	0	1.32	0	0	2.6	0.44	GO:0055085;GO:0016021;GO:0016020;GO:0000325;GO:0005774;GO:0042626;GO:0016887;GO:0005524	BP:transmembrane transport;CC:integral component of membrane;CC:membrane;CC:plant-type vacuole;CC:vacuolar membrane;MF:ATPase activity, coupled to transmembrane movement of substances;MF:ATPase activity;MF:ATP binding;	K05666;cit	ABCC2;	map02010	ABC transporters)	COG1132	V:Defense mechanisms)	sp|Q9LYS2|AB10C_ARATH;	ABC transporter C family member 10 OS=Arabidopsis thaliana OX=3702 GN=ABCC10 PE=2 SV=2;	PF00005;PF13555	ABC_tran;AAA_29	ABC transporter;P-loop containing region of AAA domain
TRINITY_DN27547_c0_g1	hypothetical protein TSUD_162450 [Trifolium subterraneum])	3.27	1.96	2.39	0.77	2.46	0.68	2.54	1.30333	GO:0016301;GO:0003723	MF:kinase activity;MF:RNA binding;	K19941;K05641	SYN;ABCA1	map02010	ABC transporters)	ENOG410Y65V;ENOG410XS82;ENOG4111K5V	S:Function unknown);	sp|P14381|YTX2_XENLA;	Transposon TX1 uncharacterized 149 kDa protein OS=Xenopus laevis OX=8355 PE=4 SV=1;	PF00078	RVT_1	Reverse transcriptase (RNA-dependent DNA polymerase)
TRINITY_DN12843_c0_g1	PREDICTED: ABC transporter F family member 1-like [Musa acuminata subsp. malaccensis])	3.27	3.27	0.96	0	2.07	2	2.5	1.35667	GO:0016887;GO:0005524	MF:ATPase activity;MF:ATP binding;	K06185	ABCF2	------	------	COG0488	S:Function unknown)	sp|Q9FJH6|AB1F_ARATH;	ABC transporter F family member 1 OS=Arabidopsis thaliana OX=3702 GN=ABCF1 PE=2 SV=1;	------	------	------
TRINITY_DN10430_c0_g2	ABC transporter B family member 11-like [Ziziphus jujuba])	2.49	4.25	0.51	2.15	4.23	0	2.41667	2.12667	GO:0016021;GO:0042626;GO:0016887;GO:0005524	CC:integral component of membrane;MF:ATPase activity, coupled to transmembrane movement of substances;MF:ATPase activity;MF:ATP binding;	K05658	ABCB1, CD243	map02010	ABC transporters)	COG1132	V:Defense mechanisms)	sp|P21447|MDR1A_MOUSE;	ATP-dependent translocase ABCB1 OS=Mus musculus OX=10090 GN=Abcb1a PE=1 SV=3;	PF00664;PF00005;PF02463;PF09818;PF13555;PF13401	ABC_membrane;ABC_tran;SMC_N;ABC_ATPase;AAA_29;AAA_22	ABC transporter transmembrane region;ABC transporter;RecF/RecN/SMC N terminal domain;Predicted ATPase of the ABC class;P-loop containing region of AAA domain;AAA domain
TRINITY_DN51209_c0_g1	hypothetical protein Lal_00005302 [Lupinus albus])	1.97	3.83	1.24	1.6	0	0	2.34667	0.533333	GO:0035435;GO:0016020;GO:0015562;GO:0005315;GO:0016887;GO:0015415;GO:0005524	BP:phosphate ion transmembrane transport;CC:membrane;MF:efflux transmembrane transporter activity;MF:inorganic phosphate transmembrane transporter activity;MF:ATPase activity;MF:ATPase-coupled phosphate ion transmembrane transporter activity;MF:ATP binding;	------	------	------	------	------	------	sp|Q5Z293|PSTB_NOCFA;	Phosphate import ATP-binding protein PstB OS=Nocardia farcinica;	PF00005;PF13304	ABC_tran;AAA_21	ABC transporter;AAA domain, putative AbiEii toxin, Type IV TA system
TRINITY_DN84157_c0_g1	leptomycin B resistance protein pmd1-like [Quercus suber])	0	6.99	0	2.62	0	0	2.33	0.873333	GO:0055085;GO:0016021;GO:0042626;GO:0016887;GO:0005524	BP:transmembrane transport;CC:integral component of membrane;MF:ATPase activity, coupled to transmembrane movement of substances;MF:ATPase activity;MF:ATP binding;	K05658	ABCB1, CD243	map02010	ABC transporters)	COG1132	V:Defense mechanisms)	sp|F2PRR1|MDR2_TRIEC;	ABC multidrug transporter MDR2 OS=Trichophyton equinum;	------	------	------
TRINITY_DN18725_c0_g1	MDR-like ABC transporter [Ginkgo biloba])	2.14	3.2	1.58	1.5	1.4	1.56	2.30667	1.48667	GO:0055085;GO:0016021;GO:0042626;GO:0016887;GO:0005524	BP:transmembrane transport;CC:integral component of membrane;MF:ATPase activity, coupled to transmembrane movement of substances;MF:ATPase activity;MF:ATP binding;	K05658	ABCB1, CD243	map02010	ABC transporters)	COG1132	V:Defense mechanisms)	sp|Q9LJX0|AB19B_ARATH;	ABC transporter B family member 19 OS=Arabidopsis thaliana OX=3702 GN=ABCB19 PE=1 SV=1;	PF00664;PF00005;PF02463;PF13191;PF06414	ABC_membrane;ABC_tran;SMC_N;AAA_16;Zeta_toxin	ABC transporter transmembrane region;ABC transporter;RecF/RecN/SMC N terminal domain;AAA ATPase domain;Zeta toxin
TRINITY_DN23258_c0_g2	ABC transporter B family member 19 [Nymphaea thermarum])	1.18	4.4	1.3	3.72	1.31	1.04	2.29333	2.02333	GO:0055085;GO:0016021;GO:0042626;GO:0016887;GO:0005524	BP:transmembrane transport;CC:integral component of membrane;MF:ATPase activity, coupled to transmembrane movement of substances;MF:ATPase activity;MF:ATP binding;	K05658	ABCB1, CD243	map02010	ABC transporters)	COG1132	V:Defense mechanisms)	sp|Q9ZR72|AB1B_ARATH;	ABC transporter B family member 1 OS=Arabidopsis thaliana OX=3702 GN=ABCB1 PE=1 SV=1;	PF00664;PF00005;PF02463;PF13191	ABC_membrane;ABC_tran;SMC_N;AAA_16	ABC transporter transmembrane region;ABC transporter;RecF/RecN/SMC N terminal domain;AAA ATPase domain
TRINITY_DN62491_c0_g3		4.98	1.7	0	5.82	4.32	1.76	2.22667	3.96667	------	------	------	------	------	------	COG1132	V:Defense mechanisms)	sp|Q8LGU1|AB8C_ARATH;	ABC transporter C family member 8 OS=Arabidopsis thaliana OX=3702 GN=ABCC8 PE=2 SV=3;	------	------	------
TRINITY_DN43300_c0_g2	predicted protein [Hordeum vulgare subsp. vulgare])	6.58	0.08	0	0.71	0	4.72	2.22	1.81	GO:0046686;GO:0042742;GO:0005829;GO:0016887;GO:0005524	BP:response to cadmium ion;BP:defense response to bacterium;CC:cytosol;MF:ATPase activity;MF:ATP binding;	K03235	EF3, TEF3	------	------	------	------	sp|O94489|EF3_SCHPO;	Elongation factor 3 OS=Schizosaccharomyces pombe;	PF00005;PF13304;PF00385	ABC_tran;AAA_21;Chromo	ABC transporter;AAA domain, putative AbiEii toxin, Type IV TA system;Chromo (CHRromatin Organisation MOdifier) domain
TRINITY_DN57749_c0_g1	ABC transporter C family member 8 isoform X1 [Ricinus communis])	0.96	3.87	1.17	6.75	7.3	2	2	5.35	GO:0055085;GO:0016021;GO:0016020;GO:0000325;GO:0005774;GO:0042626;GO:0016887;GO:0032440;GO:0005524	BP:transmembrane transport;CC:integral component of membrane;CC:membrane;CC:plant-type vacuole;CC:vacuolar membrane;MF:ATPase activity, coupled to transmembrane movement of substances;MF:ATPase activity;MF:2-alkenal reductase [NA;MF:ATP binding;	------	------	------	------	COG1132	V:Defense mechanisms)	------	------	------	------	------
TRINITY_DN17258_c0_g1	PREDICTED: pleiotropic drug resistance protein 2-like isoform X1 [Pyrus x bretschneideri])	3.24	2.25	0.48	2.4	3.46	4.23	1.99	3.36333	GO:0055085;GO:0016021;GO:0005886;GO:0042626;GO:0016887;GO:0005524	BP:transmembrane transport;CC:integral component of membrane;CC:plasma membrane;MF:ATPase activity, coupled to transmembrane movement of substances;MF:ATPase activity;MF:ATP binding;	------	------	------	------	COG0842	V:Defense mechanisms)	sp|Q7PC87|AB34G_ARATH;	ABC transporter G family member 34 OS=Arabidopsis thaliana OX=3702 GN=ABCG34 PE=2 SV=1;	PF00005;PF13481	ABC_tran;AAA_25	ABC transporter;AAA domain
TRINITY_DN24045_c1_g1	unknown [Picea sitchensis])	0	2.61	3.09	2.92	0	0	1.9	0.973333	GO:0006869;GO:0043231;GO:0016021;GO:0005319;GO:0042626;GO:0016887;GO:0005524	BP:lipid transport;CC:intracellular membrane-bounded organelle;CC:integral component of membrane;MF:lipid transporter activity;MF:ATPase activity, coupled to transmembrane movement of substances;MF:ATPase activity;MF:ATP binding;	------	------	------	------	ENOG410XXUP	S:Function unknown)	sp|Q84K47|AB2A_ARATH;	ABC transporter A family member 2 OS=Arabidopsis thaliana OX=3702 GN=ABCA2 PE=2 SV=1;	PF13476;PF00005	AAA_23;ABC_tran	AAA domain;ABC transporter
TRINITY_DN70087_c0_g2	ABC transporter B family member 11 [Zostera marina])	1.82	2.76	1.11	0	0	0	1.89667	0	GO:0055085;GO:0016021;GO:0005887;GO:0005886;GO:0042626;GO:0016887;GO:0005524	BP:transmembrane transport;CC:integral component of membrane;CC:integral component of plasma membrane;CC:plasma membrane;MF:ATPase activity, coupled to transmembrane movement of substances;MF:ATPase activity;MF:ATP binding;	K05658	ABCB1, CD243	map02010	ABC transporters)	COG1132	S:Function unknown)	sp|O80725|AB4B_ARATH;	ABC transporter B family member 4 OS=Arabidopsis thaliana OX=3702 GN=ABCB4 PE=1 SV=1;	PF00664	ABC_membrane	ABC transporter transmembrane region
TRINITY_DN82009_c0_g1	Pleiotropic drug resistance protein [Actinidia chinensis var. chinensis])	0	5.65	0	0	0	0	1.88333	0	GO:0016021;GO:0016887;GO:0005524	CC:integral component of membrane;MF:ATPase activity;MF:ATP binding;	------	------	------	------	COG0842	V:Defense mechanisms)	sp|Q8LQX2|AB32G_ORYSJ;	ABC transporter G family member 32 OS=Oryza sativa subsp. japonica OX=39947 GN=ABCG32 PE=2 SV=1;	------	------	------
TRINITY_DN45944_c0_g2		5.58	0	0	0	0	0.72	1.86	0.24	------	------	K05658	ABCB1, CD243	map02010	ABC transporters)	------	------	------	------	------	------	------
TRINITY_DN56989_c0_g1	ABC transporter G family member 39-like [Momordica charantia])	0	2.5	3.04	0	0	0.86	1.84667	0.286667	GO:0055085;GO:0016021;GO:0005886;GO:0042626;GO:0016887;GO:0005524	BP:transmembrane transport;CC:integral component of membrane;CC:plasma membrane;MF:ATPase activity, coupled to transmembrane movement of substances;MF:ATPase activity;MF:ATP binding;	------	------	------	------	COG1131;COG0842	V:Defense mechanisms);	sp|Q2QV81|AB49G_ORYSJ;	ABC transporter G family member 49 OS=Oryza sativa subsp. japonica OX=39947 GN=ABCG49 PE=2 SV=3;	------	------	------
TRINITY_DN95234_c0_g1	hypothetical protein FH972_022018 [Carpinus fangiana])	5.5	0	0	0	0	0	1.83333	0	GO:0016021;GO:0042626;GO:0016887;GO:0005524	CC:integral component of membrane;MF:ATPase activity, coupled to transmembrane movement of substances;MF:ATPase activity;MF:ATP binding;	K23329	HMT1, ACLQ	------	------	COG5265	K:Transcription)	sp|Q02592|HMT1_SCHPO;	Heavy metal tolerance protein OS=Schizosaccharomyces pombe;	PF00005	ABC_tran	ABC transporter
TRINITY_DN33372_c0_g3	hypothetical protein FH972_025233 [Carpinus fangiana])	1.8	3.28	0.36	1.68	0.19	0	1.81333	0.623333	GO:1902001;GO:0016021;GO:0005779;GO:0042626;GO:0016887;GO:0005524	BP:fatty acid transmembrane transport;CC:integral component of membrane;CC:integral component of peroxisomal membrane;MF:ATPase activity, coupled to transmembrane movement of substances;MF:ATPase activity;MF:ATP binding;	K15628	PXA	map04146;map02010	Peroxisome);ABC transporters)	COG4178	S:Function unknown)	sp|F1RBC8|ABCD1_DANRE;	ATP-binding cassette sub-family D member 1 OS=Danio rerio OX=7955 GN=abcd1 PE=2 SV=1;	PF06472;PF00005	ABC_membrane_2;ABC_tran	ABC transporter transmembrane region 2;ABC transporter
TRINITY_DN70464_c0_g7	predicted protein [Hordeum vulgare subsp. vulgare])	0	0	5.41	0	0.73	0	1.80333	0.243333	GO:0016887;GO:0005524	MF:ATPase activity;MF:ATP binding;	K03235	EF3, TEF3	------	------	COG0488	S:Function unknown)	sp|O93796|EF3_CANGA;	Elongation factor 3 OS=Candida glabrata;	PF00005;PF09913;PF02463	ABC_tran;DUF2142;SMC_N	ABC transporter;Predicted membrane protein (DUF2142);RecF/RecN/SMC N terminal domain
TRINITY_DN10751_c0_g1	Ty3/gypsy retrotransposon protein [Cucumis melo var. makuwa])	4.08	0	1.24	0	0	1.57	1.77333	0.523333	GO:0015074;GO:0003964;GO:0004190;GO:0003676	BP:DNA integration;MF:RNA-directed DNA polymerase activity;MF:aspartic-type endopeptidase activity;MF:nucleic acid binding;	obr;K05665	;ABCC1	map02010	ABC transporters)	------	------	------	------	------	------	------
TRINITY_DN17475_c0_g1	uncharacterized ABC transporter ATP-binding protein C29A3.09c-like [Quercus suber])	1.46	3.11	0.72	1.24	1.11	0	1.76333	0.783333	GO:0046686;GO:0042742;GO:0005829;GO:0016887;GO:0005524	BP:response to cadmium ion;BP:defense response to bacterium;CC:cytosol;MF:ATPase activity;MF:ATP binding;	K06158	ABCF3	------	------	COG0488	S:Function unknown)	sp|O59672|YB89_SCHPO;	Uncharacterized ABC transporter ATP-binding protein C29A3.09c OS=Schizosaccharomyces pombe;	PF00005;PF12848;PF13304;PF13555;PF13476	ABC_tran;ABC_tran_Xtn;AAA_21;AAA_29;AAA_23	ABC transporter;ABC transporter;AAA domain, putative AbiEii toxin, Type IV TA system;P-loop containing region of AAA domain;AAA domain
TRINITY_DN9589_c0_g1	ABC transporter G family member 31 isoform X2 [Amborella trichopoda])	1.54	1.33	2.27	0.31	1.68	27.55	1.71333	9.84667	GO:0016021;GO:0016887;GO:0005524	CC:integral component of membrane;MF:ATPase activity;MF:ATP binding;	------	------	------	------	COG0842	V:Defense mechanisms)	sp|Q7PC88|AB31G_ARATH;	ABC transporter G family member 31 OS=Arabidopsis thaliana OX=3702 GN=ABCG31 PE=1 SV=1;	PF01061;PF08370;PF00005;PF19055;PF13304	ABC2_membrane;PDR_assoc;ABC_tran;ABC2_membrane_7;AAA_21	ABC-2 type transporter;Plant PDR ABC transporter associated;ABC transporter;ABC-2 type transporter;AAA domain, putative AbiEii toxin, Type IV TA system
TRINITY_DN13898_c0_g2	ABC transporter C family member 8-like isoform X1 [Abrus precatorius])	0	2.67	2.44	1.67	0.84	2.76	1.70333	1.75667	GO:0016021;GO:0042626;GO:0016887;GO:0005524	CC:integral component of membrane;MF:ATPase activity, coupled to transmembrane movement of substances;MF:ATPase activity;MF:ATP binding;	K05666	ABCC2	map02010	ABC transporters)	COG1132	V:Defense mechanisms)	sp|Q8LGU1|AB8C_ARATH;	ABC transporter C family member 8 OS=Arabidopsis thaliana OX=3702 GN=ABCC8 PE=2 SV=3;	------	------	------
TRINITY_DN94194_c0_g1	predicted protein [Hordeum vulgare subsp. vulgare])	0.4	1.26	3.34	0	0.83	0	1.66667	0.276667	GO:0016887;GO:0005524	MF:ATPase activity;MF:ATP binding;	K06185	ABCF2	------	------	COG0488	J:Translation, ribosomal structure and biogenesis)	sp|Q9FJH6|AB1F_ARATH;	ABC transporter F family member 1 OS=Arabidopsis thaliana OX=3702 GN=ABCF1 PE=2 SV=1;	PF00005;PF12848;PF13304;PF02463;PF13555;PF03193;PF13476;PF13175	ABC_tran;ABC_tran_Xtn;AAA_21;SMC_N;AAA_29;RsgA_GTPase;AAA_23;AAA_15	ABC transporter;ABC transporter;AAA domain, putative AbiEii toxin, Type IV TA system;RecF/RecN/SMC N terminal domain;P-loop containing region of AAA domain;RsgA GTPase;AAA domain;AAA ATPase domain
TRINITY_DN30034_c0_g2	hypothetical protein EZV62_017035 [Acer yangbiense])	0.59	2.59	1.78	1.38	1.37	1.49	1.65333	1.41333	GO:0055085;GO:0016021;GO:0016020;GO:0005886;GO:0042626;GO:0016887;GO:0005524	BP:transmembrane transport;CC:integral component of membrane;CC:membrane;CC:plasma membrane;MF:ATPase activity, coupled to transmembrane movement of substances;MF:ATPase activity;MF:ATP binding;	------	------	------	------	COG1131	S:Function unknown)	sp|Q9FT51|AB27G_ARATH;	ABC transporter G family member 27 OS=Arabidopsis thaliana OX=3702 GN=ABCG27 PE=2 SV=1;	PF00005	ABC_tran	ABC transporter
TRINITY_DN56989_c0_g4		0	3.09	1.85	0	0	4.79	1.64667	1.59667	------	------	------	------	------	------	------	------	------	------	PF01061	ABC2_membrane	ABC-2 type transporter
TRINITY_DN58903_c0_g3	hypothetical protein FH972_026045 [Carpinus fangiana])	0	4.94	0	0	0	0	1.64667	0	------	------	K08869	ADCK, ABC1	------	------	COG0661	S:Function unknown)	sp|O60111|MCP2L_SCHPO;	ABC1 family protein MCP2 homolog OS=Schizosaccharomyces pombe;	------	------	------
TRINITY_DN88571_c0_g1	unnamed protein product [Coffea canephora])	0	0	4.93	0	5.34	0	1.64333	1.78	GO:0016021;GO:0016887;GO:0005524	CC:integral component of membrane;MF:ATPase activity;MF:ATP binding;	------	------	------	------	------	------	sp|Q7FMW4|AB38G_ORYSJ;	ABC transporter G family member 38 OS=Oryza sativa subsp. japonica OX=39947 GN=ABCG38 PE=3 SV=1;	------	------	------
TRINITY_DN20473_c0_g1	ABC transporter C family member 8-like isoform X1 [Panicum miliaceum])	3.83	0.86	0.21	0.73	2.64	0.7	1.63333	1.35667	GO:0016021;GO:0042626;GO:0016887;GO:0005524	CC:integral component of membrane;MF:ATPase activity, coupled to transmembrane movement of substances;MF:ATPase activity;MF:ATP binding;	K05665	ABCC1	map02010	ABC transporters)	COG1132	V:Defense mechanisms)	sp|Q8LGU1|AB8C_ARATH;	ABC transporter C family member 8 OS=Arabidopsis thaliana OX=3702 GN=ABCC8 PE=2 SV=3;	PF00664;PF00005	ABC_membrane;ABC_tran	ABC transporter transmembrane region;ABC transporter
TRINITY_DN26629_c0_g1	PREDICTED: ABC transporter G family member 11 [Beta vulgaris subsp. vulgaris])	0.98	1.92	1.98	0.85	2.78	3.34	1.62667	2.32333	GO:0009737;GO:0015908;GO:0055085;GO:0009611;GO:0010222;GO:0080051;GO:0009651;GO:0010588;GO:0009897;GO:0016021;GO:0005886;GO:0005634;GO:0042626;GO:0016887;GO:0015245;GO:0005524;GO:0042803	BP:response to abscisic acid;BP:fatty acid transport;BP:transmembrane transport;BP:response to wounding;BP:stem vascular tissue pattern formation;BP:cutin transport;BP:response to salt stress;BP:cotyledon vascular tissue pattern formation;CC:external side of plasma membrane;CC:integral component of membrane;CC:plasma membrane;CC:nucleus;MF:ATPase activity, coupled to transmembrane movement of sub…	------	------	------	------	COG1131	V:Defense mechanisms)	sp|Q8RXN0|AB11G_ARATH;	ABC transporter G family member 11 OS=Arabidopsis thaliana OX=3702 GN=ABCG11 PE=1 SV=1;	PF01061	ABC2_membrane	ABC-2 type transporter
TRINITY_DN33827_c0_g1	hypothetical protein FH972_021496 [Carpinus fangiana])	0.99	3.34	0.52	1.42	0.42	0	1.61667	0.613333	GO:0016021;GO:0042025;GO:0016887;GO:0005524	CC:integral component of membrane;CC:host cell nucleus;MF:ATPase activity;MF:ATP binding;	------	------	------	------	------	------	sp|D4AYW0|ABCG1_ARTBC;	ABC transporter G family member ARB_01379 OS=Arthroderma benhamiae;	PF01061;PF00005;PF19055	ABC2_membrane;ABC_tran;ABC2_membrane_7	ABC-2 type transporter;ABC transporter;ABC-2 type transporter
TRINITY_DN22573_c0_g1	DNA repair recA-like protein 3 [Nymphaea thermarum])	1.78	1.8	1.23	2.27	1.9	1.44	1.60333	1.87	GO:0006310;GO:0006281;GO:0008094;GO:0003697;GO:0005524	BP:DNA recombination;BP:DNA repair;MF:DNA-dependent ATPase activity;MF:single-stranded DNA binding;MF:ATP binding;	K03553	recA	map03440	Homologous recombination)	COG0468	L:Replication, recombination and repair)	sp|Q9ZUP2|RECA3_ARATH;	DNA repair protein recA homolog 3, mitochondrial OS=Arabidopsis thaliana OX=3702 GN=At2g19490 PE=2 SV=2;	PF00154;PF06745;PF08423;PF13479;PF01637;PF13401;PF00005;PF13481;PF02283;PF00004;PF13238	RecA;ATPase;Rad51;AAA_24;ATPase_2;AAA_22;ABC_tran;AAA_25;CobU;AAA;AAA_18	recA bacterial DNA recombination protein;KaiC;Rad51;AAA domain;ATPase domain predominantly from Archaea;AAA domain;ABC transporter;AAA domain;Cobinamide kinase / cobinamide phosphate guanyltransferase;ATPase family associated with various cellular activities (AAA);AAA domain
TRINITY_DN68572_c0_g2	predicted protein [Hordeum vulgare subsp. vulgare])	4.8	0	0	0.02	0	3.33	1.6	1.11667	GO:0006364;GO:0006351;GO:0005634;GO:0016021;GO:0008270;GO:0003677;GO:0000981	BP:rRNA processing;BP:transcription, DNA-templated;CC:nucleus;CC:integral component of membrane;MF:zinc ion binding;MF:DNA binding;MF:RNA polymerase II transcription factor activity, sequence-specific DNA binding;	------	------	------	------	------	------	sp|Q2UEH7|ATRR_ASPOR;	ABC-transporter-regulating transcription factor OS=Aspergillus oryzae;	PF04082;PF00172	Fungal_trans;Zn_clus	Fungal specific transcription factor domain;Fungal Zn(2)-Cys(6) binuclear cluster domain
TRINITY_DN87856_c0_g2	ABC transporter C family member 3 [Capsicum baccatum])	1.32	2.65	0.81	0	0	2.1	1.59333	0.7	GO:0055085;GO:0016021;GO:0016020;GO:0000325;GO:0005774;GO:0042626;GO:0016887;GO:0005524	BP:transmembrane transport;CC:integral component of membrane;CC:membrane;CC:plant-type vacuole;CC:vacuolar membrane;MF:ATPase activity, coupled to transmembrane movement of substances;MF:ATPase activity;MF:ATP binding;	------	------	------	------	COG1132	V:Defense mechanisms)	sp|Q8VZZ4|AB6C_ARATH;	ABC transporter C family member 6 OS=Arabidopsis thaliana OX=3702 GN=ABCC6 PE=2 SV=3;	------	------	------
TRINITY_DN39780_c0_g1	hypothetical protein ES319_A10G065500v1 [Gossypium barbadense])	0	2.24	2.53	0	0	6.6	1.59	2.2	GO:0055085;GO:0016021;GO:0016020;GO:0000325;GO:0005774;GO:0042626;GO:0016887;GO:0005524	BP:transmembrane transport;CC:integral component of membrane;CC:membrane;CC:plant-type vacuole;CC:vacuolar membrane;MF:ATPase activity, coupled to transmembrane movement of substances;MF:ATPase activity;MF:ATP binding;	K05665	ABCC1	map02010	ABC transporters)	COG1132	V:Defense mechanisms)	sp|Q8LGU1|AB8C_ARATH;	ABC transporter C family member 8 OS=Arabidopsis thaliana OX=3702 GN=ABCC8 PE=2 SV=3;	PF00005	ABC_tran	ABC transporter
TRINITY_DN22344_c0_g1	MDR-like ABC transporter [Ginkgo biloba])	0.81	1.96	1.99	1.07	1.5	0.71	1.58667	1.09333	GO:0055085;GO:0016021;GO:0042626;GO:0016887;GO:0005524	BP:transmembrane transport;CC:integral component of membrane;MF:ATPase activity, coupled to transmembrane movement of substances;MF:ATPase activity;MF:ATP binding;	K05658	ABCB1, CD243	map02010	ABC transporters)	COG1132	V:Defense mechanisms)	sp|Q9SGY1|AB10B_ARATH;	ABC transporter B family member 10 OS=Arabidopsis thaliana OX=3702 GN=ABCB10 PE=1 SV=2;	PF00664;PF00005;PF02463;PF13191	ABC_membrane;ABC_tran;SMC_N;AAA_16	ABC transporter transmembrane region;ABC transporter;RecF/RecN/SMC N terminal domain;AAA ATPase domain
TRINITY_DN43156_c0_g1	hypothetical protein FH972_023675 [Carpinus fangiana])	4.76	0	0	0	0	0	1.58667	0	GO:0016021;GO:0016887;GO:0005524	CC:integral component of membrane;MF:ATPase activity;MF:ATP binding;	K06185	ABCF2	------	------	COG0488	S:Function unknown)	sp|P40024|ARB1_YEAST;	ABC transporter ATP-binding protein ARB1 OS=Saccharomyces cerevisiae;	------	------	------
TRINITY_DN35234_c0_g1	hypothetical protein Ahy_A05g021882 [Arachis hypogaea])	0.46	0.92	3.37	0.54	1.14	0.95	1.58333	0.876667	GO:0055085;GO:0016021;GO:0016020;GO:0000325;GO:0005774;GO:0042626;GO:0016887;GO:0005524	BP:transmembrane transport;CC:integral component of membrane;CC:membrane;CC:plant-type vacuole;CC:vacuolar membrane;MF:ATPase activity, coupled to transmembrane movement of substances;MF:ATPase activity;MF:ATP binding;	K05666	ABCC2	map02010	ABC transporters)	COG1132	K:Transcription)	------	------	------	------	------
TRINITY_DN29340_c0_g1	uncharacterized ABC transporter ATP-binding protein C20G4.01-like [Quercus suber])	0	4.73	0	1.5	0	0	1.57667	0.5	GO:0080167;GO:0016887;GO:0005524	BP:response to karrikin;MF:ATPase activity;MF:ATP binding;	K12608	CAF16	map03018	RNA degradation)	COG1611	S:Function unknown)	sp|Q7Z991|YE31_SCHPO;	ABC transporter domain-containing protein C20G4.01 OS=Schizosaccharomyces pombe;	PF00005;PF13555;PF13481;PF13304;PF00025;PF06414;PF03193	ABC_tran;AAA_29;AAA_25;AAA_21;Arf;Zeta_toxin;RsgA_GTPase	ABC transporter;P-loop containing region of AAA domain;AAA domain;AAA domain, putative AbiEii toxin, Type IV TA system;ADP-ribosylation factor family;Zeta toxin;RsgA GTPase
TRINITY_DN70094_c0_g1	PREDICTED: ras-related protein RABC1 [Tarenaya hassleriana])	1.58	2.66	0.44	1.82	2.53	0	1.56	1.45	GO:0006886;GO:0032482;GO:0005794;GO:0012505;GO:0003924;GO:0005525	BP:intracellular protein transport;BP:Rab protein signal transduction;CC:Golgi apparatus;CC:endomembrane system;MF:GTPase activity;MF:GTP binding;	K07910	RAB18	------	------	ENOG410XPD0	S:Function unknown)	sp|Q6DHC1|RB18B_DANRE;	Ras-related protein Rab-18-B OS=Danio rerio OX=7955 GN=rab18b PE=2 SV=1;	PF00071;PF08477;PF00025;PF01926;PF00009;PF04670;PF09439	Ras;Roc;Arf;MMR_HSR1;GTP_EFTU;Gtr1_RagA;SRPRB	Ras family;Ras of Complex, Roc, domain of DAPkinase;ADP-ribosylation factor family;50S ribosome-binding GTPase;Elongation factor Tu GTP binding domain;Gtr1/RagA G protein conserved region;Signal recognition particle receptor beta subunit
TRINITY_DN38155_c0_g2	ATP-binding cassette sub-family D member 1-like [Rhodamnia argentea])	4.61	0	0	0	0	0	1.53667	0	GO:1902001;GO:0016021;GO:0005779;GO:0042626;GO:0016887;GO:0005524	BP:fatty acid transmembrane transport;CC:integral component of membrane;CC:integral component of peroxisomal membrane;MF:ATPase activity, coupled to transmembrane movement of substances;MF:ATPase activity;MF:ATP binding;	K15628	PXA	map04146;map02010	Peroxisome);ABC transporters)	COG4178	S:Function unknown)	sp|F1RBC8|ABCD1_DANRE;	ATP-binding cassette sub-family D member 1 OS=Danio rerio OX=7955 GN=abcd1 PE=2 SV=1;	PF00005	ABC_tran	ABC transporter
TRINITY_DN96845_c0_g1	protein pyrABCN-like [Quercus suber])	0	4.61	0	0	0	0	1.53667	0	GO:0006541;GO:0016036;GO:0006807;GO:0005737;GO:0009570;GO:0016021;GO:0005951;GO:0017022;GO:0004088;GO:0046872;GO:0005524	BP:glutamine metabolic process;BP:cellular response to phosphate starvation;BP:nitrogen compound metabolic process;CC:cytoplasm;CC:chloroplast stroma;CC:integral component of membrane;CC:carbamoyl-phosphate synthase complex;MF:myosin binding;MF:carbamoyl-phosphate synthas;MF:metal ion binding;MF:ATP binding;	K11541	URA2	map00240;map00250	Pyrimidine metabolism);Alanine, aspartate and glutamate metabolism)	COG0540	J:Translation, ribosomal structure and biogenesis)	sp|O93937|PYR1_EMENI;	Protein pyrABCN OS=Emericella nidulans;	PF02786	CPSase_L_D2	Carbamoyl-phosphate synthase L chain, ATP binding domain
TRINITY_DN18462_c0_g1	hypothetical protein E1A91_D05G184300v1 [Gossypium mustelinum])	2.2	1.1	1.3	2.01	2.74	1.08	1.53333	1.94333	GO:0016226	BP:iron-sulfur cluster assembly;	------	------	------	------	COG0719	V:Defense mechanisms)	sp|Q9ZS97|AB8I_ARATH;	UPF0051 protein ABCI8, chloroplastic OS=Arabidopsis thaliana OX=3702 GN=ABCI8 PE=2 SV=1;	PF01458	SUFBD	SUF system FeS cluster assembly, SufBD
TRINITY_DN26484_c1_g2	ABC transporter C family member 8-like isoform X1 [Abrus precatorius])	3.81	0.34	0.42	0	1.68	1.41	1.52333	1.03	GO:0016021;GO:0042626;GO:0016887;GO:0005524	CC:integral component of membrane;MF:ATPase activity, coupled to transmembrane movement of substances;MF:ATPase activity;MF:ATP binding;	K05665	ABCC1	map02010	ABC transporters)	COG1132	V:Defense mechanisms)	sp|Q7GB25|AB5C_ARATH;	ABC transporter C family member 5 OS=Arabidopsis thaliana OX=3702 GN=ABCC5 PE=2 SV=2;	------	------	------
TRINITY_DN25808_c0_g1	iron-sulfur clusters transporter ATM1, mitochondrial-like [Quercus suber])	1.75	2.07	0.72	0.81	0.27	0	1.51333	0.36	GO:0006777;GO:0009658;GO:0009555;GO:0046686;GO:0006879;GO:0010288;GO:0006811;GO:0050790;GO:0010380;GO:0055085;GO:0051276;GO:0048364;GO:0009941;GO:0009536;GO:0016021;GO:0005739;GO:0009507;GO:0005623;GO:0005743;GO:0016887;GO:0042626;GO:0005524	BP:Mo-molybdopterin cofactor biosynthetic process;BP:chloroplast organization;BP:pollen development;BP:response to cadmium ion;BP:cellular iron ion homeostasis;BP:response to lead ion;BP:ion transport;BP:regulation of catalytic activity;BP:regulation of chlorophyll biosynthetic process;BP:transmembrane transport;BP:chromosome organization;BP:root development;CC:chloroplast envelope;CC:plastid;CC:…	K05663	ATM	map02010	ABC transporters)	COG5265	V:Defense mechanisms)	sp|Q2ULH4|ATM1_ASPOR;	Iron-sulfur clusters transporter atm1, mitochondrial OS=Aspergillus oryzae;	PF00664;PF00005;PF02463;PF13191;PF13401;PF00004	ABC_membrane;ABC_tran;SMC_N;AAA_16;AAA_22;AAA	ABC transporter transmembrane region;ABC transporter;RecF/RecN/SMC N terminal domain;AAA ATPase domain;AAA domain;ATPase family associated with various cellular activities (AAA)
TRINITY_DN26777_c0_g1	ABC transporter [Macleaya cordata])	1.31	1.76	1.46	2.59	3.66	6.81	1.51	4.35333	GO:0016021;GO:0042626;GO:0016887;GO:0005524	CC:integral component of membrane;MF:ATPase activity, coupled to transmembrane movement of substances;MF:ATPase activity;MF:ATP binding;	K05665	ABCC1	map02010	ABC transporters)	COG1132	V:Defense mechanisms)	sp|Q7DM58|AB4C_ARATH;	ABC transporter C family member 4 OS=Arabidopsis thaliana OX=3702 GN=ABCC4 PE=1 SV=2;	------	------	------
TRINITY_DN32932_c0_g1	ABC transporter E family member 2 [Panicum hallii])	1	3.15	0.31	1.15	0.45	0	1.48667	0.533333	GO:0006415;GO:0000054;GO:0006413;GO:0016887;GO:0005506;GO:0043024;GO:0005524	BP:translational termination;BP:ribosomal subunit export from nucleus;BP:translational initiation;MF:ATPase activity;MF:iron ion binding;MF:ribosomal small subunit binding;MF:ATP binding;	K06174	ABCE1, Rli1	------	------	COG1245	S:Function unknown)	sp|P61221|ABCE1_HUMAN;	ATP-binding cassette sub-family E member 1 OS=Homo sapiens OX=9606 GN=ABCE1 PE=1 SV=1;	PF00005;PF04068;PF02463;PF00037;PF12837;PF14697	ABC_tran;RLI;SMC_N;Fer4;Fer4_6;Fer4_21	ABC transporter;Possible Fer4-like domain in RNase L inhibitor, RLI;RecF/RecN/SMC N terminal domain;4Fe-4S binding domain;4Fe-4S binding domain;4Fe-4S dicluster domain
TRINITY_DN28458_c0_g1	hypothetical protein CRG98_016133, partial [Punica granatum])	4.44	0	0	9.95	0	0	1.48	3.31667	GO:0055085;GO:0016021;GO:0016020;GO:0000325;GO:0005774;GO:0042626;GO:0016887;GO:0005524	BP:transmembrane transport;CC:integral component of membrane;CC:membrane;CC:plant-type vacuole;CC:vacuolar membrane;MF:ATPase activity, coupled to transmembrane movement of substances;MF:ATPase activity;MF:ATP binding;	K05666;K05670	ABCC2;ABCC13	map02010	ABC transporters)	COG1132	V:Defense mechanisms)	sp|Q7GB25|AB5C_ARATH;	ABC transporter C family member 5 OS=Arabidopsis thaliana OX=3702 GN=ABCC5 PE=2 SV=2;	------	------	------
TRINITY_DN45997_c0_g1	ABC transporter C family member 8 isoform X1 [Cinnamomum micranthum f. kanehirae])	0	4.41	0	2.48	0	0	1.47	0.826667	GO:0055085;GO:0016021;GO:0016020;GO:0000325;GO:0005774;GO:0042626;GO:0016887;GO:0005524	BP:transmembrane transport;CC:integral component of membrane;CC:membrane;CC:plant-type vacuole;CC:vacuolar membrane;MF:ATPase activity, coupled to transmembrane movement of substances;MF:ATPase activity;MF:ATP binding;	K05665;K05666	ABCC1;ABCC2	map02010	ABC transporters)	COG1132	V:Defense mechanisms)	sp|Q8LGU1|AB8C_ARATH;	ABC transporter C family member 8 OS=Arabidopsis thaliana OX=3702 GN=ABCC8 PE=2 SV=3;	------	------	------
TRINITY_DN18725_c0_g2	MDR-like ABC transporter [Ginkgo biloba])	1.37	1.73	1.26	0.31	0.94	1.46	1.45333	0.903333	GO:0055085;GO:0016021;GO:0042626;GO:0016887;GO:0005524	BP:transmembrane transport;CC:integral component of membrane;MF:ATPase activity, coupled to transmembrane movement of substances;MF:ATPase activity;MF:ATP binding;	K05658	ABCB1, CD243	map02010	ABC transporters)	COG1132	V:Defense mechanisms)	sp|Q9SGY1|AB10B_ARATH;	ABC transporter B family member 10 OS=Arabidopsis thaliana OX=3702 GN=ABCB10 PE=1 SV=2;	PF00005;PF00664;PF02463	ABC_tran;ABC_membrane;SMC_N	ABC transporter;ABC transporter transmembrane region;RecF/RecN/SMC N terminal domain
TRINITY_DN39526_c0_g2	elongation factor 3-like [Quercus suber])	4.23	0	0.13	0	0.59	0.05	1.45333	0.213333	GO:0016887;GO:0005524	MF:ATPase activity;MF:ATP binding;	K03235	EF3, TEF3	------	------	COG0488	S:Function unknown)	sp|O93796|EF3_CANGA;	Elongation factor 3 OS=Candida glabrata;	PF00005;PF02463;PF13304;PF13476;PF00350;PF01926;PF03193	ABC_tran;SMC_N;AAA_21;AAA_23;Dynamin_N;MMR_HSR1;RsgA_GTPase	ABC transporter;RecF/RecN/SMC N terminal domain;AAA domain, putative AbiEii toxin, Type IV TA system;AAA domain;Dynamin family;50S ribosome-binding GTPase;RsgA GTPase
TRINITY_DN50426_c0_g5	hypothetical protein FH972_023664 [Carpinus fangiana])	1.59	2.08	0.69	0.82	0.33	0	1.45333	0.383333	GO:0016021;GO:0042626;GO:0016887;GO:0005524	CC:integral component of membrane;MF:ATPase activity, coupled to transmembrane movement of substances;MF:ATPase activity;MF:ATP binding;	K05665	ABCC1	map02010	ABC transporters)	------	------	sp|P39109|YCFI_YEAST;	Metal resistance protein YCF1 OS=Saccharomyces cerevisiae;	PF00664;PF00005;PF02463	ABC_membrane;ABC_tran;SMC_N	ABC transporter transmembrane region;ABC transporter;RecF/RecN/SMC N terminal domain
TRINITY_DN43641_c0_g2	ABC transporter aclQ-like [Quercus suber])	0.99	1.83	1.52	1.83	0.17	0	1.44667	0.666667	GO:0006879;GO:0055085;GO:0016021;GO:0005623;GO:0005743;GO:0042626;GO:0016887;GO:0005524	BP:cellular iron ion homeostasis;BP:transmembrane transport;CC:integral component of membrane;CC:cell;CC:mitochondrial inner membrane;MF:ATPase activity, coupled to transmembrane movement of substances;MF:ATPase activity;MF:ATP binding;	K05661	ABCB6	map02010	ABC transporters)	COG5265	V:Defense mechanisms)	sp|Q08D64|ABCB6_XENTR;	ATP-binding cassette sub-family B member 6, mitochondrial OS=Xenopus tropicalis OX=8364 GN=abcb6 PE=2 SV=1;	PF00005;PF00664;PF02463	ABC_tran;ABC_membrane;SMC_N	ABC transporter;ABC transporter transmembrane region;RecF/RecN/SMC N terminal domain
TRINITY_DN27787_c0_g1	ABC transporter G family member 11-like protein [Cinnamomum micranthum f. kanehirae])	3	1.19	0.14	0.14	0.28	0.36	1.44333	0.26	GO:0055085;GO:0016021;GO:0016020;GO:0005886;GO:0042626;GO:0016887;GO:0005524	BP:transmembrane transport;CC:integral component of membrane;CC:membrane;CC:plasma membrane;MF:ATPase activity, coupled to transmembrane movement of substances;MF:ATPase activity;MF:ATP binding;	------	------	------	------	COG1131	T:Signal transduction mechanisms)	sp|Q8RXN0|AB11G_ARATH;	ABC transporter G family member 11 OS=Arabidopsis thaliana OX=3702 GN=ABCG11 PE=1 SV=1;	PF01061	ABC2_membrane	ABC-2 type transporter
TRINITY_DN52345_c0_g6	hypothetical protein FH972_023675 [Carpinus fangiana])	4.32	0	0	0	3.73	0	1.44	1.24333	GO:0016887;GO:0005524	MF:ATPase activity;MF:ATP binding;	K06185	ABCF2	------	------	COG0488	S:Function unknown)	sp|P40024|ARB1_YEAST;	ABC transporter ATP-binding protein ARB1 OS=Saccharomyces cerevisiae;	------	------	------
TRINITY_DN469_c0_g2	unknown [Picea sitchensis])	1.21	1.46	1.63	1.59	1.77	1.66	1.43333	1.67333	GO:0055085;GO:0016021;GO:0016020;GO:0000325;GO:0005774;GO:0042626;GO:0016887;GO:0005524	BP:transmembrane transport;CC:integral component of membrane;CC:membrane;CC:plant-type vacuole;CC:vacuolar membrane;MF:ATPase activity, coupled to transmembrane movement of substances;MF:ATPase activity;MF:ATP binding;	K05670	ABCC13	map02010	ABC transporters)	COG1132	V:Defense mechanisms)	sp|Q8LGU1|AB8C_ARATH;	ABC transporter C family member 8 OS=Arabidopsis thaliana OX=3702 GN=ABCC8 PE=2 SV=3;	PF00005	ABC_tran	ABC transporter
TRINITY_DN19206_c1_g1	ABC transporter G family member 11-like [Nymphaea colorata])	2.99	0.95	0.34	0.24	0.09	0.34	1.42667	0.223333	GO:0055085;GO:0016021;GO:0005886;GO:0042626;GO:0016887;GO:0005524	BP:transmembrane transport;CC:integral component of membrane;CC:plasma membrane;MF:ATPase activity, coupled to transmembrane movement of substances;MF:ATPase activity;MF:ATP binding;	------	------	------	------	COG1131	V:Defense mechanisms)	sp|Q8RXN0|AB11G_ARATH;	ABC transporter G family member 11 OS=Arabidopsis thaliana OX=3702 GN=ABCG11 PE=1 SV=1;	PF00005;PF13304;PF01061;PF19055;PF02463;PF13555;PF03193;PF13191;PF13401	ABC_tran;AAA_21;ABC2_membrane;ABC2_membrane_7;SMC_N;AAA_29;RsgA_GTPase;AAA_16;AAA_22	ABC transporter;AAA domain, putative AbiEii toxin, Type IV TA system;ABC-2 type transporter;ABC-2 type transporter;RecF/RecN/SMC N terminal domain;P-loop containing region of AAA domain;RsgA GTPase;AAA ATPase domain;AAA domain
TRINITY_DN37496_c0_g1	predicted protein, partial [Hordeum vulgare subsp. vulgare])	4.28	0	0	0.55	0	2.9	1.42667	1.15	GO:0016887;GO:0005524	MF:ATPase activity;MF:ATP binding;	K03235	EF3, TEF3	------	------	------	------	sp|O94489|EF3_SCHPO;	Elongation factor 3 OS=Schizosaccharomyces pombe;	PF00005;PF02463;PF13555;PF13476;PF13401;PF01935;PF17947	ABC_tran;SMC_N;AAA_29;AAA_23;AAA_22;DUF87;4HB	ABC transporter;RecF/RecN/SMC N terminal domain;P-loop containing region of AAA domain;AAA domain;AAA domain;Helicase HerA, central domain;Four helical bundle domain
TRINITY_DN62451_c0_g3		0	0	4.28	0	0	0	1.42667	0	------	------	K05658	ABCB1, CD243	map02010	ABC transporters)	COG1132	V:Defense mechanisms)	------	------	------	------	------
TRINITY_DN83756_c0_g2	unnamed protein product [Microthlaspi erraticum])	2.24	0.24	1.8	0	0	0.25	1.42667	0.083333	GO:0003964	MF:RNA-directed DNA polymerase activity;	K05695;K05641	PTPRF, LAR;ABCA1	map02010	ABC transporters)	ENOG4111K5V;ENOG410ZPXB;ENOG4111MK6	S:Function unknown);	sp|P14381|YTX2_XENLA;	Transposon TX1 uncharacterized 149 kDa protein OS=Xenopus laevis OX=8355 PE=4 SV=1;	------	------	------
TRINITY_DN90545_c0_g1	hypothetical protein Saspl_010802 [Salvia splendens])	0	0	4.25	0	0	0	1.41667	0	GO:0055085;GO:0016021;GO:0005886;GO:0042626;GO:0016887;GO:0005524	BP:transmembrane transport;CC:integral component of membrane;CC:plasma membrane;MF:ATPase activity, coupled to transmembrane movement of substances;MF:ATPase activity;MF:ATP binding;	------	------	------	------	COG1131	V:Defense mechanisms)	sp|Q8RXN0|AB11G_ARATH;	ABC transporter G family member 11 OS=Arabidopsis thaliana OX=3702 GN=ABCG11 PE=1 SV=1;	PF13304	AAA_21	AAA domain, putative AbiEii toxin, Type IV TA system
TRINITY_DN27547_c0_g2	Retrovirus-related Pol polyprotein LINE-1, partial [Cajanus cajan])	2.06	0.16	1.97	1.11	2.24	0.68	1.39667	1.34333	GO:0003887;GO:0016301;GO:0003723	MF:DNA-directed DNA polymerase activity;MF:kinase activity;MF:RNA binding;	K05641	ABCA1	map02010	ABC transporters)	ENOG4111MK6;ENOG410Y65V	S:Function unknown);	sp|P14381|YTX2_XENLA;	Transposon TX1 uncharacterized 149 kDa protein OS=Xenopus laevis OX=8355 PE=4 SV=1;	PF00078	RVT_1	Reverse transcriptase (RNA-dependent DNA polymerase)
TRINITY_DN82898_c0_g1	ABC transporter G family member 11-like [Ananas comosus])	0	4.16	0	0	0	0	1.38667	0	GO:0009737;GO:0009611;GO:0010222;GO:0080051;GO:0009651;GO:0010588;GO:0009897;GO:0016021;GO:0016887;GO:0005524;GO:0042803	BP:response to abscisic acid;BP:response to wounding;BP:stem vascular tissue pattern formation;BP:cutin transport;BP:response to salt stress;BP:cotyledon vascular tissue pattern formation;CC:external side of plasma membrane;CC:integral component of membrane;MF:ATPase activity;MF:ATP binding;MF:protein homodimerization activity;	------	------	------	------	COG1131	V:Defense mechanisms)	sp|Q8RXN0|AB11G_ARATH;	ABC transporter G family member 11 OS=Arabidopsis thaliana OX=3702 GN=ABCG11 PE=1 SV=1;	PF00005;PF13555;PF13191;PF13401;PF03193;PF02224;PF13304;PF13481	ABC_tran;AAA_29;AAA_16;AAA_22;RsgA_GTPase;Cytidylate_kin;AAA_21;AAA_25	ABC transporter;P-loop containing region of AAA domain;AAA ATPase domain;AAA domain;RsgA GTPase;Cytidylate kinase;AAA domain, putative AbiEii toxin, Type IV TA system;AAA domain
TRINITY_DN17944_c0_g1	ABC transporter C family member 4 [Sesamum indicum])	2.11	1.02	1.01	1.72	2	2	1.38	1.90667	GO:0055085;GO:0016021;GO:0016020;GO:0000325;GO:0005774;GO:0042626;GO:0016887;GO:0005524	BP:transmembrane transport;CC:integral component of membrane;CC:membrane;CC:plant-type vacuole;CC:vacuolar membrane;MF:ATPase activity, coupled to transmembrane movement of substances;MF:ATPase activity;MF:ATP binding;	sind;K05665;K05666	;ABCC1;ABCC2	map02010	ABC transporters)	COG1132	V:Defense mechanisms)	sp|Q9LZJ5|AB14C_ARATH;	ABC transporter C family member 14 OS=Arabidopsis thaliana OX=3702 GN=ABCC14 PE=1 SV=1;	PF00664	ABC_membrane	ABC transporter transmembrane region
TRINITY_DN65595_c0_g1	phosphatidylserine decarboxylase proenzyme, mitochondrial-like [Quercus suber])	1.24	2.53	0.37	0.54	0	0	1.38	0.18	GO:0006646;GO:0016540;GO:0005739;GO:0031305;GO:0004609	BP:phosphatidylethanolamine biosynthetic process;BP:protein autoprocessing;CC:mitochondrion;CC:integral component of mitochondrial inner membrane;MF:phosphatidylserine decarboxylase activity;	K01613	psd, PISD	map00564	Glycerophospholipid metabolism)	COG0688	I:Lipid transport and metabolism)	sp|Q5ABC5|PSD1_CANAL;	Phosphatidylserine decarboxylase proenzyme 1, mitochondrial OS=Candida albicans;	------	------	------
TRINITY_DN27768_c0_g2	ABC transporter B family member 25, mitochondrial [Malus domestica])	1.28	2.36	0.47	1.29	0.74	0	1.37	0.676667	GO:0006879;GO:0055085;GO:0016021;GO:0005623;GO:0005743;GO:0042626;GO:0016887;GO:0005524	BP:cellular iron ion homeostasis;BP:transmembrane transport;CC:integral component of membrane;CC:cell;CC:mitochondrial inner membrane;MF:ATPase activity, coupled to transmembrane movement of substances;MF:ATPase activity;MF:ATP binding;	K05661;K06147	ABCB6;ABCB-BAC	map02010	ABC transporters)	COG5265	J:Translation, ribosomal structure and biogenesis)	sp|Q02592|HMT1_SCHPO;	Heavy metal tolerance protein OS=Schizosaccharomyces pombe;	PF00005;PF02463	ABC_tran;SMC_N	ABC transporter;RecF/RecN/SMC N terminal domain
TRINITY_DN30637_c0_g3	PREDICTED: uncharacterized protein LOC104443069 [Eucalyptus grandis])	0.52	0.53	3.04	0	0.99	0	1.36333	0.33	GO:0016192;GO:0016021;GO:0005634;GO:0004519;GO:0004523;GO:0008270;GO:0003676;GO:0003677;GO:0003964	BP:vesicle-mediated transport;CC:integral component of membrane;CC:nucleus;MF:endonuclease activity;MF:RNA-DNA hybrid ribonuclease activity;MF:zinc ion binding;MF:nucleic acid binding;MF:DNA binding;MF:RNA-directed DNA polymerase activity;	K05030;K05641	CLCA3_4;ABCA1	map02010	ABC transporters)	ENOG410ZPXB;ENOG4111K5V;ENOG410Y65V;ENOG410ZKXM	S:Function unknown);	sp|P08548|LIN1_NYCCO;	LINE-1 reverse transcriptase homolog OS=Nycticebus coucang OX=9470 PE=4 SV=1;	PF00078	RVT_1	Reverse transcriptase (RNA-dependent DNA polymerase)
TRINITY_DN54113_c0_g2		0	4.05	0	0	0	0.7	1.35	0.233333	------	------	------	------	------	------	COG1131;COG0842	C:Energy production and conversion);	------	------	PF01061	ABC2_membrane	ABC-2 type transporter
TRINITY_DN41535_c0_g3		2.63	0.29	1.06	0	0	0	1.32667	0	------	------	------	------	------	------	------	------	------	------	PF01926;PF01637;PF04548;PF00005;PF13173;PF03193	MMR_HSR1;ATPase_2;AIG1;ABC_tran;AAA_14;RsgA_GTPase	50S ribosome-binding GTPase;ATPase domain predominantly from Archaea;AIG1 family;ABC transporter;AAA domain;RsgA GTPase
TRINITY_DN49857_c0_g1	ABC transporter B family member 2-like isoform X1 [Spinacia oleracea])	0.6	1.34	1.99	0.3	0	2.29	1.31	0.863333	GO:0016021;GO:0042626;GO:0016887;GO:0005524	CC:integral component of membrane;MF:ATPase activity, coupled to transmembrane movement of substances;MF:ATPase activity;MF:ATP binding;	K05658	ABCB1, CD243	map02010	ABC transporters)	COG1132	V:Defense mechanisms)	sp|Q9ZR72|AB1B_ARATH;	ABC transporter B family member 1 OS=Arabidopsis thaliana OX=3702 GN=ABCB1 PE=1 SV=1;	PF00664	ABC_membrane	ABC transporter transmembrane region
TRINITY_DN63146_c0_g2	ABC transporter C family member 8 [Dichanthelium oligosanthes])	0.96	2.95	0	0	0.53	0	1.30333	0.176667	GO:0055085;GO:0016021;GO:0016020;GO:0000325;GO:0005774;GO:0042626;GO:0016887;GO:0005524	BP:transmembrane transport;CC:integral component of membrane;CC:membrane;CC:plant-type vacuole;CC:vacuolar membrane;MF:ATPase activity, coupled to transmembrane movement of substances;MF:ATPase activity;MF:ATP binding;	ppp;K05665	;ABCC1	map02010	ABC transporters)	COG1132	V:Defense mechanisms)	sp|Q8LGU1|AB8C_ARATH;	ABC transporter C family member 8 OS=Arabidopsis thaliana OX=3702 GN=ABCC8 PE=2 SV=3;	------	------	------
TRINITY_DN66500_c0_g1	LOW QUALITY PROTEIN: ATP-dependent bile acid permease-like [Quercus suber])	1.25	2.27	0.39	0.6	0.07	0	1.30333	0.223333	GO:0055085;GO:0016021;GO:0016020;GO:0000325;GO:0005774;GO:0042626;GO:0016887;GO:0005524	BP:transmembrane transport;CC:integral component of membrane;CC:membrane;CC:plant-type vacuole;CC:vacuolar membrane;MF:ATPase activity, coupled to transmembrane movement of substances;MF:ATPase activity;MF:ATP binding;	------	------	------	------	------	------	sp|P32386|YBT1_YEAST;	ATP-dependent bile acid permease OS=Saccharomyces cerevisiae;	PF00005;PF00664;PF02463	ABC_tran;ABC_membrane;SMC_N	ABC transporter;ABC transporter transmembrane region;RecF/RecN/SMC N terminal domain
TRINITY_DN22344_c0_g3	MDR-like ABC transporter [Ginkgo biloba])	0	2.98	0.91	0.87	0	0	1.29667	0.29	GO:0055085;GO:0016021;GO:0005739;GO:0042626;GO:0016887;GO:0005524	BP:transmembrane transport;CC:integral component of membrane;CC:mitochondrion;MF:ATPase activity, coupled to transmembrane movement of substances;MF:ATPase activity;MF:ATP binding;	K05658	ABCB1, CD243	map02010	ABC transporters)	COG1132	V:Defense mechanisms)	sp|Q9SGY1|AB10B_ARATH;	ABC transporter B family member 10 OS=Arabidopsis thaliana OX=3702 GN=ABCB10 PE=1 SV=2;	------	------	------
TRINITY_DN70464_c0_g1	elongation factor 3-like [Quercus suber])	3.8	0.04	0.05	0	0	0	1.29667	0	GO:0016887;GO:0005524	MF:ATPase activity;MF:ATP binding;	K03235	EF3, TEF3	------	------	COG0488	S:Function unknown)	sp|P25997|EF3_CANAL;	Elongation factor 3 OS=Candida albicans;	PF00005;PF17947;PF13304;PF02463;PF13476;PF13555;PF13401;PF03193;PF01926	ABC_tran;4HB;AAA_21;SMC_N;AAA_23;AAA_29;AAA_22;RsgA_GTPase;MMR_HSR1	ABC transporter;Four helical bundle domain;AAA domain, putative AbiEii toxin, Type IV TA system;RecF/RecN/SMC N terminal domain;AAA domain;P-loop containing region of AAA domain;AAA domain;RsgA GTPase;50S ribosome-binding GTPase
TRINITY_DN75861_c0_g2	phloem protein 2-A3 [Arabidopsis thaliana])	0.45	2.95	0.48	1.36	0	0	1.29333	0.453333	GO:0030246;GO:0005525	MF:carbohydrate binding;MF:GTP binding;	------	------	------	------	------	------	sp|Q8NHV1|GIMA7_HUMAN;	GTPase IMAP family member 7 OS=Homo sapiens OX=9606 GN=GIMAP7 PE=1 SV=1;	PF01079;PF04548;PF01926;PF00350;PF09439;PF03193;PF02421;PF00005;PF13238	Hint;AIG1;MMR_HSR1;Dynamin_N;SRPRB;RsgA_GTPase;FeoB_N;ABC_tran;AAA_18	Hint module;AIG1 family;50S ribosome-binding GTPase;Dynamin family;Signal recognition particle receptor beta subunit;RsgA GTPase;Ferrous iron transport protein B;ABC transporter;AAA domain
TRINITY_DN32995_c0_g1	Sister chromatid cohesion protein Dcc1 [Cinnamomum micranthum f. kanehirae])	0	3.23	0.63	1.64	3.73	0	1.28667	1.79	GO:0034088;GO:0006275;GO:0007064;GO:0005654;GO:0000785;GO:0000775;GO:0031390	BP:maintenance of mitotic sister chromatid cohesion;BP:regulation of DNA replication;BP:mitotic sister chromatid cohesion;CC:nucleoplasm;CC:chromatin;CC:chromosome, centromeric region;CC:Ctf18 RFC-like complex;	K11271	DSCC1, DCC1	------	------	ENOG41108M8	S:Function unknown)	sp|Q8LGU1|AB8C_ARATH;	ABC transporter C family member 8 OS=Arabidopsis thaliana OX=3702 GN=ABCC8 PE=2 SV=3;	PF09724	Dcc1	Sister chromatid cohesion protein Dcc1
TRINITY_DN34950_c1_g3	LOW QUALITY PROTEIN: leptomycin B resistance protein pmd1-like [Quercus suber])	0.22	3.46	0.18	0.86	0	0	1.28667	0.286667	GO:0055085;GO:0016021;GO:0042626;GO:0016887;GO:0005524	BP:transmembrane transport;CC:integral component of membrane;MF:ATPase activity, coupled to transmembrane movement of substances;MF:ATPase activity;MF:ATP binding;	K05658	ABCB1, CD243	map02010	ABC transporters)	COG1132	V:Defense mechanisms)	sp|Q9Y8G1|ATRD_EMEND;	ABC multidrug transporter atrD OS=Emericella nidulans OX=162425 GN=atrD PE=1 SV=1;	PF00005;PF02463;PF01935;PF13555;PF13191	ABC_tran;SMC_N;DUF87;AAA_29;AAA_16	ABC transporter;RecF/RecN/SMC N terminal domain;Helicase HerA, central domain;P-loop containing region of AAA domain;AAA ATPase domain
TRINITY_DN77677_c0_g1	hypothetical protein TanjilG_11933 [Lupinus angustifolius])	0	3.86	0	0	0	0	1.28667	0	GO:0046686;GO:0042742;GO:0005829;GO:0016887;GO:0005524	BP:response to cadmium ion;BP:defense response to bacterium;CC:cytosol;MF:ATPase activity;MF:ATP binding;	K06158	ABCF3	------	------	COG0488	K:Transcription)	sp|P43535|GCN20_YEAST;	Protein GCN20 OS=Saccharomyces cerevisiae;	PF00005	ABC_tran	ABC transporter
TRINITY_DN70087_c0_g1		1.9	1.95	0	0	0	0	1.28333	0	------	------	------	------	------	------	------	------	------	------	PF00664	ABC_membrane	ABC transporter transmembrane region
TRINITY_DN94891_c0_g1	MDR-like ABC transporter [Oryza sativa Japonica Group])	0	3.83	0	2.17	0	0	1.27667	0.723333	GO:0055085;GO:0016021;GO:0042626;GO:0016887;GO:0005524	BP:transmembrane transport;CC:integral component of membrane;MF:ATPase activity, coupled to transmembrane movement of substances;MF:ATPase activity;MF:ATP binding;	K05659;K05658	ABCB4;ABCB1, CD243	map02010	ABC transporters)	COG1132	V:Defense mechanisms)	sp|P08183|MDR1_HUMAN;	ATP-dependent translocase ABCB1 OS=Homo sapiens OX=9606 GN=ABCB1 PE=1 SV=3;	PF00664	ABC_membrane	ABC transporter transmembrane region
TRINITY_DN65676_c0_g3	hypothetical protein ES319_D12G048800v1 [Gossypium barbadense])	0.79	2.72	0.27	2.46	0.32	0	1.26	0.926667	GO:0055085;GO:0016021;GO:0016020;GO:0000325;GO:0005774;GO:0042626;GO:0016887;GO:0005524	BP:transmembrane transport;CC:integral component of membrane;CC:membrane;CC:plant-type vacuole;CC:vacuolar membrane;MF:ATPase activity, coupled to transmembrane movement of substances;MF:ATPase activity;MF:ATP binding;	K05668;K05665;ccan	ABCC5;ABCC1;	map02010	ABC transporters)	COG1132	V:Defense mechanisms)	sp|Q9R1X5|MRP5_MOUSE;	Multidrug resistance-associated protein 5 OS=Mus musculus OX=10090 GN=Abcc5 PE=1 SV=2;	PF00005;PF02463	ABC_tran;SMC_N	ABC transporter;RecF/RecN/SMC N terminal domain
TRINITY_DN92164_c0_g1	hypothetical protein C1H46_002577 [Malus baccata])	0.67	0.67	2.44	0	0	0	1.26	0	GO:0006351;GO:0003899;GO:0008270;GO:0003677	BP:transcription, DNA-templated;MF:DNA-directed RNA polymerase activity;MF:zinc ion binding;MF:DNA binding;	K03009	RPB12, POLR2K	map03020	RNA polymerase)	COG1996	S:Function unknown)	sp|P48011|RPAB4_SCHPO;	DNA-directed RNA polymerases I, II, and III subunit RPABC4 OS=Schizosaccharomyces pombe;	PF03604	DNA_RNApol_7kD	DNA directed RNA polymerase, 7 kDa subunit
TRINITY_DN45362_c1_g2	LOW QUALITY PROTEIN: ABC transporter G family member 11-like [Pistacia vera])	0	3.69	0	4.04	0	0	1.23	1.34667	GO:0055085;GO:0016021;GO:0005886;GO:0042626;GO:0016887;GO:0005524	BP:transmembrane transport;CC:integral component of membrane;CC:plasma membrane;MF:ATPase activity, coupled to transmembrane movement of substances;MF:ATPase activity;MF:ATP binding;	------	------	------	------	COG1131	S:Function unknown)	sp|Q8RXN0|AB11G_ARATH;	ABC transporter G family member 11 OS=Arabidopsis thaliana OX=3702 GN=ABCG11 PE=1 SV=1;	PF19055	ABC2_membrane_7	ABC-2 type transporter
TRINITY_DN47564_c0_g1		0.86	1.73	1.05	4.04	4.35	0.89	1.21333	3.09333	------	------	K02040	pstS	map02010	ABC transporters)	COG0226	P:Inorganic ion transport and metabolism)	sp|P46338|PSTS_BACSU;	Phosphate-binding protein PstS OS=Bacillus subtilis;	PF12849;PF12727	PBP_like_2;PBP_like	PBP superfamily domain;PBP superfamily domain
TRINITY_DN51031_c0_g2	hypothetical protein FH972_025233 [Carpinus fangiana])	0.79	2.85	0	0.91	0	0	1.21333	0.303333	GO:1902001;GO:0016021;GO:0005779;GO:0042626;GO:0016887;GO:0005524	BP:fatty acid transmembrane transport;CC:integral component of membrane;CC:integral component of peroxisomal membrane;MF:ATPase activity, coupled to transmembrane movement of substances;MF:ATPase activity;MF:ATP binding;	K15628	PXA	map04146;map02010	Peroxisome);ABC transporters)	------	------	sp|P41909|PXA1_YEAST;	Peroxisomal long-chain fatty acid import protein 2 OS=Saccharomyces cerevisiae;	PF06472	ABC_membrane_2	ABC transporter transmembrane region 2
TRINITY_DN52006_c0_g1	ABC transporter C family member 8-like isoform X1 [Abrus precatorius])	1.27	1.91	0.46	0.66	0.37	1.35	1.21333	0.793333	GO:0016021;GO:0042626;GO:0016887;GO:0005524	CC:integral component of membrane;MF:ATPase activity, coupled to transmembrane movement of substances;MF:ATPase activity;MF:ATP binding;	------	------	------	------	------	------	------	------	------	------	------
TRINITY_DN9374_c1_g2		1.14	1.91	0.56	1.22	1.13	0.79	1.20333	1.04667	------	------	------	------	------	------	------	------	------	------	PF00005	ABC_tran	ABC transporter
TRINITY_DN34950_c0_g1	LOW QUALITY PROTEIN: leptomycin B resistance protein pmd1-like [Quercus suber])	1.09	2.25	0.16	1.67	1.02	0	1.16667	0.896667	GO:0016021;GO:0042626;GO:0016887;GO:0005524	CC:integral component of membrane;MF:ATPase activity, coupled to transmembrane movement of substances;MF:ATPase activity;MF:ATP binding;	K05658	ABCB1, CD243	map02010	ABC transporters)	COG1132	S:Function unknown)	sp|Q4WTT9|MDR1_ASPFU;	ABC multidrug transporter mdr1 OS=Neosartorya fumigata;	PF00664;PF00005;PF02463;PF09818	ABC_membrane;ABC_tran;SMC_N;ABC_ATPase	ABC transporter transmembrane region;ABC transporter;RecF/RecN/SMC N terminal domain;Predicted ATPase of the ABC class
TRINITY_DN60365_c0_g2		1.36	1.32	0.82	0.4	0	0	1.16667	0.133333	------	------	------	------	------	------	------	------	------	------	PF04548;PF01926;PF03193;PF01695;PF00437;PF00735;PF00005	AIG1;MMR_HSR1;RsgA_GTPase;IstB_IS21;T2SSE;Septin;ABC_tran	AIG1 family;50S ribosome-binding GTPase;RsgA GTPase;IstB-like ATP binding protein;Type II/IV secretion system protein;Septin;ABC transporter
TRINITY_DN33518_c0_g3	hypothetical protein FH972_023382 [Carpinus fangiana])	1.05	2.16	0.26	0.63	0.82	0	1.15667	0.483333	GO:1902001;GO:0016021;GO:0005779;GO:0042626;GO:0016887;GO:0046872;GO:0005524	BP:fatty acid transmembrane transport;CC:integral component of membrane;CC:integral component of peroxisomal membrane;MF:ATPase activity, coupled to transmembrane movement of substances;MF:ATPase activity;MF:metal ion binding;MF:ATP binding;	K15628	PXA	map04146;map02010	Peroxisome);ABC transporters)	COG4178	S:Function unknown)	sp|P33897|ABCD1_HUMAN;	ATP-binding cassette sub-family D member 1 OS=Homo sapiens OX=9606 GN=ABCD1 PE=1 SV=2;	PF06472;PF00005;PF13304	ABC_membrane_2;ABC_tran;AAA_21	ABC transporter transmembrane region 2;ABC transporter;AAA domain, putative AbiEii toxin, Type IV TA system
TRINITY_DN83297_c0_g1	LOW QUALITY PROTEIN: ABC transporter C family member 8 [Phoenix dactylifera])	0.94	1.92	0.61	0.68	1.01	0.79	1.15667	0.826667	GO:0055085;GO:0016021;GO:0016020;GO:0000325;GO:0005774;GO:0042626;GO:0016887;GO:0005524	BP:transmembrane transport;CC:integral component of membrane;CC:membrane;CC:plant-type vacuole;CC:vacuolar membrane;MF:ATPase activity, coupled to transmembrane movement of substances;MF:ATPase activity;MF:ATP binding;	ppp;K05665;pda	;ABCC1;	map02010	ABC transporters)	COG1132	O:Posttranslational modification, protein turnover, chaperones)	sp|Q8LGU1|AB8C_ARATH;	ABC transporter C family member 8 OS=Arabidopsis thaliana OX=3702 GN=ABCC8 PE=2 SV=3;	PF00005;PF00664;PF01926;PF13604	ABC_tran;ABC_membrane;MMR_HSR1;AAA_30	ABC transporter;ABC transporter transmembrane region;50S ribosome-binding GTPase;AAA domain
TRINITY_DN52345_c0_g2	hypothetical protein FH972_023675 [Carpinus fangiana])	0.89	0.96	1.59	0	0	0	1.14667	0	GO:0016887;GO:0005524	MF:ATPase activity;MF:ATP binding;	K06185	ABCF2	------	------	COG0488	S:Function unknown)	sp|P40024|ARB1_YEAST;	ABC transporter ATP-binding protein ARB1 OS=Saccharomyces cerevisiae;	PF00005	ABC_tran	ABC transporter
TRINITY_DN70464_c0_g2	elongation factor 3-like [Quercus suber])	0	0	3.43	0	2.76	0	1.14333	0.92	GO:0016887;GO:0005524	MF:ATPase activity;MF:ATP binding;	K03235	EF3, TEF3	------	------	COG0488	S:Function unknown)	sp|P25997|EF3_CANAL;	Elongation factor 3 OS=Candida albicans;	PF00005;PF13476;PF03193;PF01926;PF00350;PF13521;PF13555	ABC_tran;AAA_23;RsgA_GTPase;MMR_HSR1;Dynamin_N;AAA_28;AAA_29	ABC transporter;AAA domain;RsgA GTPase;50S ribosome-binding GTPase;Dynamin family;AAA domain;P-loop containing region of AAA domain
TRINITY_DN80800_c0_g1	PREDICTED: ABC transporter G family member 15-like [Ipomoea nil])	0	3.4	0	0	0	0	1.13333	0	GO:0055085;GO:0016021;GO:0005886;GO:0042626;GO:0016887;GO:0005524	BP:transmembrane transport;CC:integral component of membrane;CC:plasma membrane;MF:ATPase activity, coupled to transmembrane movement of substances;MF:ATPase activity;MF:ATP binding;	K05681	ABCG2, CD338	map02010	ABC transporters)	COG1131;COG0842	E:Amino acid transport and metabolism);	sp|Q7TMS5|ABCG2_MOUSE;	Broad substrate specificity ATP-binding cassette transporter ABCG2 OS=Mus musculus OX=10090 GN=Abcg2 PE=1 SV=1;	------	------	------
TRINITY_DN92753_c0_g1	guanylate kinase-like [Quercus suber])	1.1	2.3	0	1.06	0	0	1.13333	0.353333	GO:0005829;GO:0004385	CC:cytosol;MF:guanylate kinase activity;	K00942	E2.7.4.8, gmk	map00230	Purine metabolism)	COG0194;ENOG410YC53	U:Intracellular trafficking, secretion, and vesicular transport);S:Function unknown)	sp|P15454|KGUA_YEAST;	Guanylate kinase OS=Saccharomyces cerevisiae;	PF00625;PF13671;PF13191;PF13401;PF00005;PF00910;PF13555	Guanylate_kin;AAA_33;AAA_16;AAA_22;ABC_tran;RNA_helicase;AAA_29	Guanylate kinase;AAA domain;AAA ATPase domain;AAA domain;ABC transporter;RNA helicase;P-loop containing region of AAA domain
TRINITY_DN17301_c0_g1	uncharacterized protein slr0889 isoform X1 [Amborella trichopoda])	1.04	1.05	1.28	0.59	0.85	1.46	1.12333	0.966667	GO:0005524;GO:0004672	MF:ATP binding;MF:protein kinase activity;	K08869	ADCK, ABC1	------	------	COG0661	S:Function unknown)	sp|Q5ZMT7|ADCK1_CHICK;	AarF domain-containing protein kinase 1 OS=Gallus gallus OX=9031 GN=ADCK1 PE=2 SV=1;	PF03109	ABC1	ABC1 family
TRINITY_DN39198_c0_g2	RNA-directed DNA polymerase, eukaryota [Artemisia annua])	0.44	0.85	2.08	2.78	2.2	1.16	1.12333	2.04667	GO:0045717;GO:0016021;GO:0005829;GO:0009506;GO:0005886;GO:0005634;GO:0016301;GO:0003964;GO:0003723	BP:negative regulation of fatty acid biosynthetic process;CC:integral component of membrane;CC:cytosol;CC:plasmodesma;CC:plasma membrane;CC:nucleus;MF:kinase activity;MF:RNA-directed DNA polymerase activity;MF:RNA binding;	K19941;K05641;K13912	SYN;ABCA1;DMBT1	map02010	ABC transporters)	ENOG4111K5V;ENOG4111MK6;ENOG410ZPXB;ENOG410Y65V;ENOG410YSGX	S:Function unknown);	sp|P14381|YTX2_XENLA;	Transposon TX1 uncharacterized 149 kDa protein OS=Xenopus laevis OX=8355 PE=4 SV=1;	PF00078	RVT_1	Reverse transcriptase (RNA-dependent DNA polymerase)
TRINITY_DN73818_c0_g1	pleiotropic drug resistance protein 2 [Amborella trichopoda])	0.16	2.88	0.26	2.03	0.51	0.33	1.1	0.956667	GO:0055085;GO:0016021;GO:0005886;GO:0042626;GO:0016887;GO:0005524	BP:transmembrane transport;CC:integral component of membrane;CC:plasma membrane;MF:ATPase activity, coupled to transmembrane movement of substances;MF:ATPase activity;MF:ATP binding;	------	------	------	------	COG0842;COG0465	V:Defense mechanisms);O:Posttranslational modification, protein turnover, chaperones)	sp|H6WS93|PDR1_PETAX;	Pleiotropic drug resistance protein 1 OS=Petunia axillaris OX=33119 GN=PDR1 PE=2 SV=1;	PF01061;PF00005;PF08370;PF19055;PF14510;PF00004	ABC2_membrane;ABC_tran;PDR_assoc;ABC2_membrane_7;ABC_trans_N;AAA	ABC-2 type transporter;ABC transporter;Plant PDR ABC transporter associated;ABC-2 type transporter;ABC-transporter N-terminal;ATPase family associated with various cellular activities (AAA)
TRINITY_DN58903_c0_g2	ABC1 family protein MCP2 homolog [Quercus suber])	0.4	0	2.89	0	0	0	1.09667	0	GO:0016301;GO:0005524;GO:0004672	MF:kinase activity;MF:ATP binding;MF:protein kinase activity;	K08869	ADCK, ABC1	------	------	COG0661	S:Function unknown)	sp|O60111|MCP2L_SCHPO;	ABC1 family protein MCP2 homolog OS=Schizosaccharomyces pombe;	PF03109	ABC1	ABC1 family
TRINITY_DN28737_c0_g2	ABC transporter G family member 44-like [Phoenix dactylifera])	2.14	0.62	0.52	0	1.53	1.94	1.09333	1.15667	GO:0055085;GO:0016021;GO:0005886;GO:0042626;GO:0016887;GO:0005524	BP:transmembrane transport;CC:integral component of membrane;CC:plasma membrane;MF:ATPase activity, coupled to transmembrane movement of substances;MF:ATPase activity;MF:ATP binding;	------	------	------	------	------	------	------	------	------	------	------
TRINITY_DN54275_c0_g2	hypothetical protein FH972_022072 [Carpinus fangiana])	0.63	2.63	0	0	0	0	1.08667	0	GO:0046686;GO:0042742;GO:0005829;GO:0016887;GO:0005524	BP:response to cadmium ion;BP:defense response to bacterium;CC:cytosol;MF:ATPase activity;MF:ATP binding;	K06158	ABCF3	------	------	COG0488	U:Intracellular trafficking, secretion, and vesicular transport)	sp|O59672|YB89_SCHPO;	Uncharacterized ABC transporter ATP-binding protein C29A3.09c OS=Schizosaccharomyces pombe;	PF12848;PF00005	ABC_tran_Xtn;ABC_tran	ABC transporter;ABC transporter
TRINITY_DN34950_c0_g2	leptomycin B resistance protein pmd1-like [Quercus suber])	0.86	2.28	0.11	0.66	0.22	0	1.08333	0.293333	GO:0055085;GO:0016021;GO:0042626;GO:0016887;GO:0005524	BP:transmembrane transport;CC:integral component of membrane;MF:ATPase activity, coupled to transmembrane movement of substances;MF:ATPase activity;MF:ATP binding;	K05658	ABCB1, CD243	map02010	ABC transporters)	COG1132	V:Defense mechanisms)	sp|Q9Y8G1|ATRD_EMEND;	ABC multidrug transporter atrD OS=Emericella nidulans OX=162425 GN=atrD PE=1 SV=1;	PF00005;PF02463	ABC_tran;SMC_N	ABC transporter;RecF/RecN/SMC N terminal domain
TRINITY_DN39516_c2_g1	ABC transporter C family member 9 [Morus notabilis])	1.4	1.01	0.83	1.2	0	1.39	1.08	0.863333	GO:0006013;GO:0015074;GO:0016021;GO:0042626;GO:0016887;GO:0030246;GO:0008270;GO:0003676;GO:0003964;GO:0004559;GO:0005524	BP:mannose metabolic process;BP:DNA integration;CC:integral component of membrane;MF:ATPase activity, coupled to transmembrane movement of substances;MF:ATPase activity;MF:carbohydrate binding;MF:zinc ion binding;MF:nucleic acid binding;MF:RNA-directed DNA polymerase activity;MF:alpha-mannosidase activity;MF:ATP binding;	------	------	------	------	ENOG410XS4D;COG2801	S:Function unknown);L:Replication, recombination and repair)	sp|Q94HW2|POLR1_ARATH;	Retrovirus-related Pol polyprotein from transposon RE1 OS=Arabidopsis thaliana OX=3702 GN=RE1 PE=2 SV=1;	PF07727	RVT_2	Reverse transcriptase (RNA-dependent DNA polymerase)
TRINITY_DN19260_c0_g1	hypothetical protein PRUPE_3G269400 [Prunus persica])	0.75	1.51	0.92	0	0	6.22	1.06	2.07333	GO:0055085;GO:0016021;GO:0042626;GO:0016887;GO:0005524	BP:transmembrane transport;CC:integral component of membrane;MF:ATPase activity, coupled to transmembrane movement of substances;MF:ATPase activity;MF:ATP binding;	K05658	ABCB1, CD243	map02010	ABC transporters)	COG1132	V:Defense mechanisms)	sp|Q9LJX0|AB19B_ARATH;	ABC transporter B family member 19 OS=Arabidopsis thaliana OX=3702 GN=ABCB19 PE=1 SV=1;	PF00005	ABC_tran	ABC transporter
TRINITY_DN46008_c0_g1	PREDICTED: ABC transporter C family member 2-like [Musa acuminata subsp. malaccensis])	0.83	2.05	0.3	0.89	0.06	0	1.06	0.316667	GO:0055085;GO:0016020;GO:0016021;GO:0000325;GO:0005774;GO:0042626;GO:0051087;GO:0016887;GO:0005524	BP:transmembrane transport;CC:membrane;CC:integral component of membrane;CC:plant-type vacuole;CC:vacuolar membrane;MF:ATPase activity, coupled to transmembrane movement of substances;MF:chaperone binding;MF:ATPase activity;MF:ATP binding;	------	------	------	------	------	------	sp|Q6FWS5|YBT1_CANGA;	Pleiotropic ABC efflux transporter of multiple drugs YBT1 OS=Candida glabrata;	PF00005;PF02463;PF13401;PF00437	ABC_tran;SMC_N;AAA_22;T2SSE	ABC transporter;RecF/RecN/SMC N terminal domain;AAA domain;Type II/IV secretion system protein
TRINITY_DN50426_c0_g3	metal resistance protein YCF1-like [Quercus suber])	2.11	1.07	0	0	0	0	1.06	0	GO:0055085;GO:0016021;GO:0016020;GO:0000325;GO:0005774;GO:0042626;GO:0016887;GO:0004672;GO:0005524	BP:transmembrane transport;CC:integral component of membrane;CC:membrane;CC:plant-type vacuole;CC:vacuolar membrane;MF:ATPase activity, coupled to transmembrane movement of substances;MF:ATPase activity;MF:protein kinase activity;MF:ATP binding;	ola;bpec;K05665;clec	;;ABCC1;	map02010	ABC transporters)	COG1132	S:Function unknown)	sp|O35379|MRP1_MOUSE;	Multidrug resistance-associated protein 1 OS=Mus musculus OX=10090 GN=Abcc1 PE=1 SV=1;	PF00664	ABC_membrane	ABC transporter transmembrane region
TRINITY_DN34950_c1_g4	LOW QUALITY PROTEIN: leptomycin B resistance protein pmd1-like [Quercus suber])	0.41	2.25	0.48	1.48	0	0	1.04667	0.493333	GO:0055085;GO:0016021;GO:0042626;GO:0016887;GO:0005524	BP:transmembrane transport;CC:integral component of membrane;MF:ATPase activity, coupled to transmembrane movement of substances;MF:ATPase activity;MF:ATP binding;	K05658	ABCB1, CD243	map02010	ABC transporters)	COG1132	V:Defense mechanisms)	sp|Q9Y8G1|ATRD_EMEND;	ABC multidrug transporter atrD OS=Emericella nidulans OX=162425 GN=atrD PE=1 SV=1;	PF00005;PF02463;PF01820;PF13304	ABC_tran;SMC_N;Dala_Dala_lig_N;AAA_21	ABC transporter;RecF/RecN/SMC N terminal domain;D-ala D-ala ligase N-terminus;AAA domain, putative AbiEii toxin, Type IV TA system
TRINITY_DN72398_c0_g1	ABCB2 protein [Pinus radiata])	0	2.58	0.56	2.19	0	0.16	1.04667	0.783333	GO:0016021;GO:0042626;GO:0016887;GO:0005524	CC:integral component of membrane;MF:ATPase activity, coupled to transmembrane movement of substances;MF:ATPase activity;MF:ATP binding;	K05658	ABCB1, CD243	map02010	ABC transporters)	COG1132	V:Defense mechanisms)	sp|Q9C7F2|AB14B_ARATH;	ABC transporter B family member 14 OS=Arabidopsis thaliana OX=3702 GN=ABCB14 PE=3 SV=1;	PF00664	ABC_membrane	ABC transporter transmembrane region
TRINITY_DN10300_c0_g1	PREDICTED: ABC transporter B family member 2-like [Erythranthe guttata])	1.31	1.03	0.71	0.83	0.55	1.42	1.01667	0.933333	GO:0055085;GO:0016021;GO:0042626;GO:0016887;GO:0005524	BP:transmembrane transport;CC:integral component of membrane;MF:ATPase activity, coupled to transmembrane movement of substances;MF:ATPase activity;MF:ATP binding;	K05659;K05658	ABCB4;ABCB1, CD243	map02010	ABC transporters)	COG1132	V:Defense mechanisms)	sp|P21440|MDR3_MOUSE;	Phosphatidylcholine translocator ABCB4 OS=Mus musculus OX=10090 GN=Abcb4 PE=1 SV=2;	PF00005;PF02463	ABC_tran;SMC_N	ABC transporter;RecF/RecN/SMC N terminal domain
TRINITY_DN42133_c0_g2	leptomycin B resistance protein pmd1-like [Quercus suber])	3.02	0	0	0	0	1.01	1.00667	0.336667	GO:0016021;GO:0042626;GO:0016887;GO:0005524	CC:integral component of membrane;MF:ATPase activity, coupled to transmembrane movement of substances;MF:ATPase activity;MF:ATP binding;	K05658	ABCB1, CD243	map02010	ABC transporters)	------	------	sp|Q9Y8G1|ATRD_EMEND;	ABC multidrug transporter atrD OS=Emericella nidulans OX=162425 GN=atrD PE=1 SV=1;	PF00664	ABC_membrane	ABC transporter transmembrane region
TRINITY_DN64112_c0_g1	ABC transporter C family member 8-like isoform X1 [Abrus precatorius])	1.73	0	1.28	0	0	1.09	1.00333	0.363333	GO:0016021;GO:0042626;GO:0016887;GO:0005524	CC:integral component of membrane;MF:ATPase activity, coupled to transmembrane movement of substances;MF:ATPase activity;MF:ATP binding;	------	------	------	------	------	------	------	------	------	------	------
TRINITY_DN34950_c1_g5	leptomycin B resistance protein pmd1-like [Quercus suber])	0.55	2.17	0.27	0.74	0	0	0.996667	0.246667	GO:0016021;GO:0042626;GO:0016887;GO:0005524	CC:integral component of membrane;MF:ATPase activity, coupled to transmembrane movement of substances;MF:ATPase activity;MF:ATP binding;	K05658	ABCB1, CD243	map02010	ABC transporters)	COG1132	V:Defense mechanisms)	sp|Q4WTT9|MDR1_ASPFU;	ABC multidrug transporter mdr1 OS=Neosartorya fumigata;	PF00664;PF00005;PF02463;PF09818	ABC_membrane;ABC_tran;SMC_N;ABC_ATPase	ABC transporter transmembrane region;ABC transporter;RecF/RecN/SMC N terminal domain;Predicted ATPase of the ABC class
TRINITY_DN48053_c0_g2	hypothetical protein 0_16607_01, partial [Pinus mugo])	0	1.86	1.13	1.08	0	0.96	0.996667	0.68	GO:0055085;GO:0016021;GO:0016020;GO:0000325;GO:0005774;GO:0042626;GO:0016887;GO:0005524	BP:transmembrane transport;CC:integral component of membrane;CC:membrane;CC:plant-type vacuole;CC:vacuolar membrane;MF:ATPase activity, coupled to transmembrane movement of substances;MF:ATPase activity;MF:ATP binding;	------	------	------	------	COG1132	V:Defense mechanisms)	sp|Q8LGU1|AB8C_ARATH;	ABC transporter C family member 8 OS=Arabidopsis thaliana OX=3702 GN=ABCC8 PE=2 SV=3;	------	------	------
TRINITY_DN34950_c1_g1	hypothetical protein FH972_023597 [Carpinus fangiana])	0	2.98	0	0.36	0	0	0.993333	0.12	GO:0055085;GO:0016021;GO:0042626;GO:0016887;GO:0003677;GO:0046983;GO:0005524	BP:transmembrane transport;CC:integral component of membrane;MF:ATPase activity, coupled to transmembrane movement of substances;MF:ATPase activity;MF:DNA binding;MF:protein dimerization activity;MF:ATP binding;	K05658	ABCB1, CD243	map02010	ABC transporters)	COG1132	V:Defense mechanisms)	sp|Q9Y8G1|ATRD_EMEND;	ABC multidrug transporter atrD OS=Emericella nidulans OX=162425 GN=atrD PE=1 SV=1;	PF00664	ABC_membrane	ABC transporter transmembrane region
TRINITY_DN58152_c0_g1	1,4-dihydroxy-2-naphthoate polyprenyltransferase, chloroplastic [Hordeum vulgare])	0.64	0	2.32	0	0.77	0	0.986667	0.256667	GO:0042372;GO:0032194;GO:0042371;GO:0009772;GO:0010236;GO:0016021;GO:0009507;GO:0004659	BP:phylloquinone biosynthetic process;BP:ubiquinone biosynthetic process via 3,4-dihydroxy-5-polyprenylbenzoate;BP:vitamin K biosynthetic process;BP:photosynthetic electron transport in photosystem II;BP:plastoquinone biosynthetic process;CC:integral component of membrane;CC:chloroplast;MF:prenyltransferase activity;	K23094	ABC4, menA	map00130	Ubiquinone and other terpenoid-quinone biosynthesis)	COG1575	S:Function unknown)	------	------	------	------	------
TRINITY_DN25888_c0_g3	MOB kinase activator-like 1A isoform X1 [Olea europaea var. sylvestris])	0	0	2.93	0	0	1.23	0.976667	0.41	GO:0016301	MF:kinase activity;	------	------	------	------	------	------	sp|Q5ABC6|MOB2_CANAL;	CBK1 kinase activator protein MOB2 OS=Candida albicans;	PF03637	Mob1_phocein	Mob1/phocein family
TRINITY_DN38155_c0_g4	hypothetical protein FH972_025233 [Carpinus fangiana])	2.93	0	0	0	0	1.88	0.976667	0.626667	GO:1902001;GO:0016021;GO:0005779;GO:0042626;GO:0016887;GO:0005524	BP:fatty acid transmembrane transport;CC:integral component of membrane;CC:integral component of peroxisomal membrane;MF:ATPase activity, coupled to transmembrane movement of substances;MF:ATPase activity;MF:ATP binding;	K15628	PXA	map04146;map02010	Peroxisome);ABC transporters)	------	------	sp|P48410|ABCD1_MOUSE;	ATP-binding cassette sub-family D member 1 OS=Mus musculus OX=10090 GN=Abcd1 PE=1 SV=1;	------	------	------
TRINITY_DN31494_c0_g1	hypothetical protein C4D60_Mb05t07050 [Musa balbisiana])	0.89	1.18	0.84	1.29	1.28	0.93	0.97	1.16667	GO:0055085;GO:0016021;GO:0005886;GO:0042626;GO:0016887;GO:0005524	BP:transmembrane transport;CC:integral component of membrane;CC:plasma membrane;MF:ATPase activity, coupled to transmembrane movement of substances;MF:ATPase activity;MF:ATP binding;	------	------	------	------	COG1131	V:Defense mechanisms)	sp|Q8RXN0|AB11G_ARATH;	ABC transporter G family member 11 OS=Arabidopsis thaliana OX=3702 GN=ABCG11 PE=1 SV=1;	------	------	------
TRINITY_DN84181_c0_g1	immune-associated nucleotide-binding protein 9-like [Citrus sinensis])	2.8	0.1	0	0	0	0	0.966667	0	GO:0005525	MF:GTP binding;	------	------	------	------	------	------	sp|Q8NHV1|GIMA7_HUMAN;	GTPase IMAP family member 7 OS=Homo sapiens OX=9606 GN=GIMAP7 PE=1 SV=1;	PF04548;PF01926;PF13476;PF13401;PF02421;PF03193;PF00005	AIG1;MMR_HSR1;AAA_23;AAA_22;FeoB_N;RsgA_GTPase;ABC_tran	AIG1 family;50S ribosome-binding GTPase;AAA domain;AAA domain;Ferrous iron transport protein B;RsgA GTPase;ABC transporter
TRINITY_DN38315_c0_g1	hypothetical protein C4D60_Mb01t04340 [Musa balbisiana])	0.36	2.14	0.39	1.2	1.23	0.9	0.963333	1.11	GO:0005975;GO:0006412;GO:0005840;GO:0016021;GO:1990904;GO:0046658;GO:0003735;GO:0003723;GO:0004553;GO:0042973	BP:carbohydrate metabolic process;BP:translation;CC:ribosome;CC:integral component of membrane;CC:ribonucleoprotein complex;CC:anchored component of plasma membrane;MF:structural constituent of ribosome;MF:RNA binding;MF:hydrolase activity, hydrolyzing O-glycosyl compounds;MF:glucan endo-1,3-beta-D-glucosidase activity;	K19893	GN5_6	map00500	Starch and sucrose metabolism)	ENOG410YE7X;ENOG410YARB	G:Carbohydrate transport and metabolism);	sp|Q9M088|E135_ARATH;	Glucan endo-1,3-beta-glucosidase 5 OS=Arabidopsis thaliana OX=3702 GN=At4g31140 PE=2 SV=1;	PF00332;PF07983;PF12698	Glyco_hydro_17;X8;ABC2_membrane_3	Glycosyl hydrolases family 17;X8 domain;ABC-2 family transporter protein
TRINITY_DN39206_c0_g1	unknown [Picea sitchensis])	0	0	2.89	0	0	1.21	0.963333	0.403333	GO:0006351;GO:0005736;GO:0005665;GO:0005666;GO:0003677;GO:0003899	BP:transcription, DNA-templated;CC:DNA-directed RNA polymerase I complex;CC:DNA-directed RNA polymerase II, core complex;CC:DNA-directed RNA polymerase III complex;MF:DNA binding;MF:DNA-directed RNA polymerase activity;	K03014	RPB6, POLR2F	map03020	RNA polymerase)	COG1758	K:Transcription)	sp|P36595|RPAB2_SCHPO;	DNA-directed RNA polymerases I, II, and III subunit RPABC2 OS=Schizosaccharomyces pombe;	PF01192	RNA_pol_Rpb6	RNA polymerase Rpb6
TRINITY_DN43945_c0_g1	hypothetical protein EUGRSUZ_D00217 [Eucalyptus grandis])	1.12	1.39	0.38	0.74	0.56	0	0.963333	0.433333	GO:0016021;GO:0042626;GO:0016887;GO:0005524	CC:integral component of membrane;MF:ATPase activity, coupled to transmembrane movement of substances;MF:ATPase activity;MF:ATP binding;	------	------	------	------	------	------	sp|P32386|YBT1_YEAST;	ATP-dependent bile acid permease OS=Saccharomyces cerevisiae;	PF00005;PF02463	ABC_tran;SMC_N	ABC transporter;RecF/RecN/SMC N terminal domain
TRINITY_DN71175_c0_g1	uncharacterized protein LOC113784598 [Cicer arietinum])	2.85	0	0	0	0	0	0.95	0	GO:0015074;GO:0004190;GO:0008270;GO:0003676	BP:DNA integration;MF:aspartic-type endopeptidase activity;MF:zinc ion binding;MF:nucleic acid binding;	cam;K05666	;ABCC2	map02010	ABC transporters)	------	------	------	------	PF17919;PF17917	RT_RNaseH_2;RT_RNaseH	RNase H-like domain found in reverse transcriptase;RNase H-like domain found in reverse transcriptase
TRINITY_DN71348_c0_g3	ABC transporter C family member 14-like [Solanum lycopersicum])	1.44	1.41	0	0.67	0	0	0.95	0.223333	GO:0055085;GO:0016021;GO:0016020;GO:0000325;GO:0005774;GO:0042626;GO:0016887;GO:0005524	BP:transmembrane transport;CC:integral component of membrane;CC:membrane;CC:plant-type vacuole;CC:vacuolar membrane;MF:ATPase activity, coupled to transmembrane movement of substances;MF:ATPase activity;MF:ATP binding;	K05668;K05672;K05671	ABCC5;ABCC12;ABCC11	map02010	ABC transporters)	COG1132	S:Function unknown)	sp|Q80WJ6|MRP9_MOUSE;	Multidrug resistance-associated protein 9 OS=Mus musculus OX=10090 GN=Abcc12 PE=2 SV=1;	------	------	------
TRINITY_DN102226_c0_g1	hypothetical protein FH972_021496 [Carpinus fangiana])	0	0	2.82	0	0	2.46	0.94	0.82	GO:0016021;GO:0042025;GO:0016887;GO:0005524	CC:integral component of membrane;CC:host cell nucleus;MF:ATPase activity;MF:ATP binding;	------	------	------	------	------	------	sp|D4AYW0|ABCG1_ARTBC;	ABC transporter G family member ARB_01379 OS=Arthroderma benhamiae;	PF01061	ABC2_membrane	ABC-2 type transporter
TRINITY_DN75663_c1_g1	ABC transporter C family member 8-like [Quercus suber])	0	0	2.81	0	4.51	0	0.936667	1.50333	GO:0055085;GO:0016021;GO:0016020;GO:0000325;GO:0005774;GO:0042626;GO:0016887;GO:0005524	BP:transmembrane transport;CC:integral component of membrane;CC:membrane;CC:plant-type vacuole;CC:vacuolar membrane;MF:ATPase activity, coupled to transmembrane movement of substances;MF:ATPase activity;MF:ATP binding;	------	------	------	------	COG1132	S:Function unknown)	sp|Q7GB25|AB5C_ARATH;	ABC transporter C family member 5 OS=Arabidopsis thaliana OX=3702 GN=ABCC5 PE=2 SV=2;	PF00005	ABC_tran	ABC transporter
TRINITY_DN36262_c0_g1	TMV resistance protein N-like [Vigna radiata var. radiata])	1.87	0.08	0.79	0.82	0.05	1.93	0.913333	0.933333	GO:0007165;GO:0016021;GO:0043531	BP:signal transduction;CC:integral component of membrane;MF:ADP binding;	------	------	------	------	COG4886;ENOG4112BMQ;ENOG410ZVQH	S:Function unknown);	sp|O49471|RPP2D_ARATH;	Probable disease resistance protein At4g19530 OS=Arabidopsis thaliana OX=3702 GN=At4g19530 PE=1 SV=2;	PF13676;PF01582;PF13401;PF13173;PF13191;PF00005;PF13238	TIR_2;TIR;AAA_22;AAA_14;AAA_16;ABC_tran;AAA_18	TIR domain;TIR domain;AAA domain;AAA domain;AAA ATPase domain;ABC transporter;AAA domain
TRINITY_DN33827_c0_g2	hypothetical protein FH972_021496 [Carpinus fangiana])	0.66	1.76	0.31	0.61	0	0	0.91	0.203333	GO:0016021;GO:0042025;GO:0016887;GO:0005524	CC:integral component of membrane;CC:host cell nucleus;MF:ATPase activity;MF:ATP binding;	------	------	------	------	COG1131	E:Amino acid transport and metabolism)	sp|D4AYW0|ABCG1_ARTBC;	ABC transporter G family member ARB_01379 OS=Arthroderma benhamiae;	------	------	------
TRINITY_DN80800_c0_g2	ABC transporter G family member 11-like [Quercus suber])	0.35	2.3	0.08	0.72	0	0	0.91	0.24	GO:0055085;GO:0016021;GO:0005886;GO:0042626;GO:0016887;GO:0005524	BP:transmembrane transport;CC:integral component of membrane;CC:plasma membrane;MF:ATPase activity, coupled to transmembrane movement of substances;MF:ATPase activity;MF:ATP binding;	------	------	------	------	------	------	sp|Q8RXN0|AB11G_ARATH;	ABC transporter G family member 11 OS=Arabidopsis thaliana OX=3702 GN=ABCG11 PE=1 SV=1;	PF01061;PF19055	ABC2_membrane;ABC2_membrane_7	ABC-2 type transporter;ABC-2 type transporter
TRINITY_DN45944_c0_g4	hypothetical protein Lal_00003826 [Lupinus albus])	2.72	0	0	0	0	0	0.906667	0	GO:0016021;GO:0042626;GO:0016887;GO:0005524	CC:integral component of membrane;MF:ATPase activity, coupled to transmembrane movement of substances;MF:ATPase activity;MF:ATP binding;	K05658	ABCB1, CD243	map02010	ABC transporters)	------	------	sp|Q4WTT9|MDR1_ASPFU;	ABC multidrug transporter mdr1 OS=Neosartorya fumigata;	PF00664	ABC_membrane	ABC transporter transmembrane region
TRINITY_DN71348_c0_g2	hypothetical protein Lal_00004257 [Lupinus albus])	0.54	2.09	0	0.84	0.64	0	0.876667	0.493333	GO:0016021;GO:0042626;GO:0016887;GO:0005524	CC:integral component of membrane;MF:ATPase activity, coupled to transmembrane movement of substances;MF:ATPase activity;MF:ATP binding;	------	------	------	------	------	------	sp|Q54U44|ABCCC_DICDI;	ABC transporter C family member 12 OS=Dictyostelium discoideum OX=44689 GN=abcC12 PE=3 SV=1;	PF00664	ABC_membrane	ABC transporter transmembrane region
TRINITY_DN80799_c0_g1	LOW QUALITY PROTEIN: ABC transporter G family member 31-like [Abrus precatorius])	2.6	0	0	0	0	5.48	0.866667	1.82667	GO:0055085;GO:0016021;GO:0009506;GO:0005886;GO:0042626;GO:0016788;GO:0016887;GO:0005524	BP:transmembrane transport;CC:integral component of membrane;CC:plasmodesma;CC:plasma membrane;MF:ATPase activity, coupled to transmembrane movement of substances;MF:hydrolase activity, acting on ester bonds;MF:ATPase activity;MF:ATP binding;	------	------	------	------	COG0842;COG1131	S:Function unknown);	sp|Q8GU84|AB48G_ORYSJ;	ABC transporter G family member 48 OS=Oryza sativa subsp. japonica OX=39947 GN=ABCG48 PE=3 SV=1;	PF00005	ABC_tran	ABC transporter
TRINITY_DN78424_c0_g1	hypothetical protein CUMW_217170 [Citrus unshiu])	2.58	0	0	0	0	0	0.86	0	GO:0016021;GO:0016887;GO:0005524	CC:integral component of membrane;MF:ATPase activity;MF:ATP binding;	------	------	------	------	COG0842	S:Function unknown)	sp|Q9M9E1|AB40G_ARATH;	ABC transporter G family member 40 OS=Arabidopsis thaliana OX=3702 GN=ABCG40 PE=1 SV=1;	------	------	------
TRINITY_DN95681_c0_g1	hypothetical protein FH972_023664 [Carpinus fangiana])	2.53	0	0	0	0	0	0.843333	0	GO:0016021;GO:0042626;GO:0016887;GO:0005524	CC:integral component of membrane;MF:ATPase activity, coupled to transmembrane movement of substances;MF:ATPase activity;MF:ATP binding;	K05665	ABCC1	map02010	ABC transporters)	COG1132	S:Function unknown)	sp|P39109|YCFI_YEAST;	Metal resistance protein YCF1 OS=Saccharomyces cerevisiae;	------	------	------
TRINITY_DN43950_c0_g3	predicted protein, partial [Hordeum vulgare subsp. vulgare])	0.41	0.2	1.91	0.15	0.08	2.09	0.84	0.773333	GO:0016887;GO:0005524	MF:ATPase activity;MF:ATP binding;	K03235	EF3, TEF3	------	------	COG0488	O:Posttranslational modification, protein turnover, chaperones)	sp|Q08972|NEW1_YEAST;	[NU+] prion formation protein 1 OS=Saccharomyces cerevisiae;	PF00005;PF00385	ABC_tran;Chromo	ABC transporter;Chromo (CHRromatin Organisation MOdifier) domain
TRINITY_DN70562_c0_g1	protein ACTIVITY OF BC1 COMPLEX KINASE 1, chloroplastic [Nicotiana tomentosiformis])	0.81	1.05	0.65	0.63	0.32	1.09	0.836667	0.68	GO:0016021;GO:0005524;GO:0004672	CC:integral component of membrane;MF:ATP binding;MF:protein kinase activity;	------	------	------	------	COG0661	L:Replication, recombination and repair)	sp|Q8RWG1|AB1K1_ARATH;	Protein ACTIVITY OF BC1 COMPLEX KINASE 1, chloroplastic OS=Arabidopsis thaliana OX=3702 GN=ABC1K1 PE=1 SV=1;	------	------	------
TRINITY_DN19195_c0_g1	ABC transporter F family member 1 [Vitis riparia])	1.23	0.23	0.99	0.12	1.14	12.97	0.816667	4.74333	GO:0016887;GO:0005524	MF:ATPase activity;MF:ATP binding;	K06158;K06185	ABCF3;ABCF2	------	------	COG0488	S:Function unknown)	sp|Q99LE6|ABCF2_MOUSE;	ATP-binding cassette sub-family F member 2 OS=Mus musculus OX=10090 GN=Abcf2 PE=1 SV=1;	PF00005;PF13304	ABC_tran;AAA_21	ABC transporter;AAA domain, putative AbiEii toxin, Type IV TA system
TRINITY_DN62451_c0_g1	ABC transporter B family member 11-like [Dendrobium catenatum])	1.22	0.88	0.34	0.47	1.98	0	0.813333	0.816667	GO:0016021;GO:0042626;GO:0016887;GO:0005524	CC:integral component of membrane;MF:ATPase activity, coupled to transmembrane movement of substances;MF:ATPase activity;MF:ATP binding;	K05658	ABCB1, CD243	map02010	ABC transporters)	COG1132	S:Function unknown)	sp|P08183|MDR1_HUMAN;	ATP-dependent translocase ABCB1 OS=Homo sapiens OX=9606 GN=ABCB1 PE=1 SV=3;	PF00005;PF00664;PF02463;PF09818	ABC_tran;ABC_membrane;SMC_N;ABC_ATPase	ABC transporter;ABC transporter transmembrane region;RecF/RecN/SMC N terminal domain;Predicted ATPase of the ABC class
TRINITY_DN62587_c0_g2	NU+ prion formation protein 1-like [Quercus suber])	2.03	0	0.41	0	0	0	0.813333	0	GO:0016021;GO:0016887;GO:0005524	CC:integral component of membrane;MF:ATPase activity;MF:ATP binding;	K03235	EF3, TEF3	------	------	COG0488	S:Function unknown)	sp|Q08972|NEW1_YEAST;	[NU+] prion formation protein 1 OS=Saccharomyces cerevisiae;	PF13304;PF00005	AAA_21;ABC_tran	AAA domain, putative AbiEii toxin, Type IV TA system;ABC transporter
TRINITY_DN24324_c0_g1	unnamed protein product [Triticum turgidum subsp. durum])	1.05	1.27	0.11	1.1	0.66	0.57	0.81	0.776667	GO:0055085;GO:0016021;GO:0005886;GO:0042626;GO:0016887;GO:0005524	BP:transmembrane transport;CC:integral component of membrane;CC:plasma membrane;MF:ATPase activity, coupled to transmembrane movement of substances;MF:ATPase activity;MF:ATP binding;	------	------	------	------	COG0842	S:Function unknown)	sp|Q8GU85|AB40G_ORYSJ;	ABC transporter G family member 40 OS=Oryza sativa subsp. japonica OX=39947 GN=ABCG40 PE=3 SV=2;	------	------	------
TRINITY_DN30345_c0_g3	unnamed protein product [Microthlaspi erraticum])	0	2.43	0	0.57	0	0	0.81	0.19	GO:0006879;GO:0055085;GO:0016021;GO:0005623;GO:0005743;GO:0042626;GO:0016887;GO:0005524	BP:cellular iron ion homeostasis;BP:transmembrane transport;CC:integral component of membrane;CC:cell;CC:mitochondrial inner membrane;MF:ATPase activity, coupled to transmembrane movement of substances;MF:ATPase activity;MF:ATP binding;	K05661	ABCB6	map02010	ABC transporters)	ENOG410YYGS;COG5265	S:Function unknown);	sp|Q08D64|ABCB6_XENTR;	ATP-binding cassette sub-family B member 6, mitochondrial OS=Xenopus tropicalis OX=8364 GN=abcb6 PE=2 SV=1;	PF00664	ABC_membrane	ABC transporter transmembrane region
TRINITY_DN84627_c0_g1	ABC transporter G family member 42 [Nymphaea thermarum])	0.52	0	1.91	1.85	0	0	0.81	0.616667	GO:0016021;GO:0016887;GO:0005524	CC:integral component of membrane;MF:ATPase activity;MF:ATP binding;	------	------	------	------	------	------	------	------	------	------	------
TRINITY_DN10463_c0_g1	ABC transporter C family member 8 [Dendrobium catenatum])	0	2.42	0	2.71	3.07	0	0.806667	1.92667	GO:0055085;GO:0016021;GO:0016020;GO:0000325;GO:0005774;GO:0042626;GO:0016887;GO:0005524	BP:transmembrane transport;CC:integral component of membrane;CC:membrane;CC:plant-type vacuole;CC:vacuolar membrane;MF:ATPase activity, coupled to transmembrane movement of substances;MF:ATPase activity;MF:ATP binding;	------	------	------	------	COG1132	V:Defense mechanisms)	sp|Q8VZZ4|AB6C_ARATH;	ABC transporter C family member 6 OS=Arabidopsis thaliana OX=3702 GN=ABCC6 PE=2 SV=3;	------	------	------
TRINITY_DN62451_c0_g2	ABC transporter B family member 19 [Helianthus annuus])	0.51	0.99	0.92	1.77	0.3	0	0.806667	0.69	GO:0055085;GO:0016021;GO:0042626;GO:0016887;GO:0005524	BP:transmembrane transport;CC:integral component of membrane;MF:ATPase activity, coupled to transmembrane movement of substances;MF:ATPase activity;MF:ATP binding;	K05658	ABCB1, CD243	map02010	ABC transporters)	COG1132	V:Defense mechanisms)	sp|P21449|MDR2_CRIGR;	Multidrug resistance protein 2 OS=Cricetulus griseus OX=10029 GN=PGY2 PE=2 SV=2;	PF00005;PF09818;PF02463	ABC_tran;ABC_ATPase;SMC_N	ABC transporter;Predicted ATPase of the ABC class;RecF/RecN/SMC N terminal domain
TRINITY_DN49665_c0_g1	hypothetical protein Saspl_017808 [Salvia splendens])	0	2.12	0.29	0.85	0	0	0.803333	0.283333	GO:0016021;GO:0016887;GO:0005524	CC:integral component of membrane;MF:ATPase activity;MF:ATP binding;	------	------	------	------	COG0842	L:Replication, recombination and repair)	sp|Q6YW62|AB44G_ORYSJ;	ABC transporter G family member 44 OS=Oryza sativa subsp. japonica OX=39947 GN=ABCG44 PE=2 SV=2;	------	------	------
TRINITY_DN52345_c0_g4	hypothetical protein FH972_023675 [Carpinus fangiana])	0.68	0.26	1.47	0	0	0	0.803333	0	GO:0016887;GO:0005524	MF:ATPase activity;MF:ATP binding;	K06185	ABCF2	------	------	COG0488	S:Function unknown)	sp|P40024|ARB1_YEAST;	ABC transporter ATP-binding protein ARB1 OS=Saccharomyces cerevisiae;	PF12848;PF00005	ABC_tran_Xtn;ABC_tran	ABC transporter;ABC transporter
TRINITY_DN63404_c0_g4	ABC transporter C family member 9 [Morus notabilis])	0.72	0.23	1.45	0	0.57	0.24	0.8	0.27	GO:0015074;GO:0016021;GO:0042626;GO:0016887;GO:0008270;GO:0003676;GO:0005524	BP:DNA integration;CC:integral component of membrane;MF:ATPase activity, coupled to transmembrane movement of substances;MF:ATPase activity;MF:zinc ion binding;MF:nucleic acid binding;MF:ATP binding;	------	------	------	------	ENOG410XS4D;COG2801	S:Function unknown);L:Replication, recombination and repair)	sp|Q9ZT94|POLR2_ARATH;	Retrovirus-related Pol polyprotein from transposon RE2 OS=Arabidopsis thaliana OX=3702 GN=RE2 PE=4 SV=1;	PF07727	RVT_2	Reverse transcriptase (RNA-dependent DNA polymerase)
TRINITY_DN57829_c0_g3	ATP-binding cassette, subfamily B (MDR/TAP), member 1 [Salvia splendens])	0.35	2.04	0	0.41	0	0	0.796667	0.136667	GO:0055085;GO:0016021;GO:0042626;GO:0016887;GO:0005524	BP:transmembrane transport;CC:integral component of membrane;MF:ATPase activity, coupled to transmembrane movement of substances;MF:ATPase activity;MF:ATP binding;	K05658	ABCB1, CD243	map02010	ABC transporters)	COG1132	V:Defense mechanisms)	sp|Q9FHF1|AB7B_ARATH;	ABC transporter B family member 7 OS=Arabidopsis thaliana OX=3702 GN=ABCB7 PE=3 SV=1;	PF00005	ABC_tran	ABC transporter
TRINITY_DN28737_c0_g1	PREDICTED: pleiotropic drug resistance protein 1-like [Nelumbo nucifera])	0.85	0.86	0.65	0.74	0.82	1.1	0.786667	0.886667	GO:0055085;GO:0016021;GO:0005886;GO:0042626;GO:0016887;GO:0005524	BP:transmembrane transport;CC:integral component of membrane;CC:plasma membrane;MF:ATPase activity, coupled to transmembrane movement of substances;MF:ATPase activity;MF:ATP binding;	------	------	------	------	COG0842	V:Defense mechanisms)	sp|Q76CU2|PDR1_TOBAC;	Pleiotropic drug resistance protein 1 OS=Nicotiana tabacum OX=4097 GN=PDR1 PE=2 SV=1;	PF01061;PF00005;PF08370;PF19055	ABC2_membrane;ABC_tran;PDR_assoc;ABC2_membrane_7	ABC-2 type transporter;ABC transporter;Plant PDR ABC transporter associated;ABC-2 type transporter
TRINITY_DN26731_c1_g1	Pleiotropic drug resistance protein 1 [Vitis vinifera])	0.97	0.74	0.63	2.28	3.01	2.57	0.78	2.62	GO:0055085;GO:0016021;GO:0005886;GO:0042626;GO:0016887;GO:0005524	BP:transmembrane transport;CC:integral component of membrane;CC:plasma membrane;MF:ATPase activity, coupled to transmembrane movement of substances;MF:ATPase activity;MF:ATP binding;	------	------	------	------	COG0842	J:Translation, ribosomal structure and biogenesis)	sp|Q8GU88|AB39G_ORYSJ;	ABC transporter G family member 39 OS=Oryza sativa subsp. japonica OX=39947 GN=ABCG39 PE=3 SV=1;	------	------	------
TRINITY_DN49717_c0_g1	MDR-like ABC transporter [Taxus cuspidata])	0.71	1.03	0.57	1.72	2.34	0.92	0.77	1.66	GO:0055085;GO:0016021;GO:0042626;GO:0016887;GO:0005524	BP:transmembrane transport;CC:integral component of membrane;MF:ATPase activity, coupled to transmembrane movement of substances;MF:ATPase activity;MF:ATP binding;	K05658	ABCB1, CD243	map02010	ABC transporters)	COG1132	P:Inorganic ion transport and metabolism)	sp|Q9FWX7|AB11B_ARATH;	ABC transporter B family member 11 OS=Arabidopsis thaliana OX=3702 GN=ABCB11 PE=2 SV=1;	PF00664;PF00005;PF02463;PF03193	ABC_membrane;ABC_tran;SMC_N;RsgA_GTPase	ABC transporter transmembrane region;ABC transporter;RecF/RecN/SMC N terminal domain;RsgA GTPase
TRINITY_DN98138_c0_g1	hypothetical protein FH972_021517 [Carpinus fangiana])	2.31	0	0	0	0	0	0.77	0	GO:0016021;GO:0042626;GO:0016887;GO:0005524	CC:integral component of membrane;MF:ATPase activity, coupled to transmembrane movement of substances;MF:ATPase activity;MF:ATP binding;	------	------	------	------	------	------	sp|P53049|YOR1_YEAST;	Oligomycin resistance ATP-dependent permease YOR1 OS=Saccharomyces cerevisiae;	PF00005;PF02463	ABC_tran;SMC_N	ABC transporter;RecF/RecN/SMC N terminal domain
TRINITY_DN75334_c0_g1	unnamed protein product [Triticum turgidum subsp. durum])	1.43	0.12	0.71	0.58	0.68	1.16	0.753333	0.806667	GO:0016021;GO:0016887;GO:0005524;GO:0015419	CC:integral component of membrane;MF:ATPase activity;MF:ATP binding;MF:ATPase-coupled sulfate transmembrane transporter activity;	------	------	------	------	------	------	sp|Q7PC85|AB38G_ARATH;	ABC transporter G family member 38 OS=Arabidopsis thaliana OX=3702 GN=ABCG38 PE=2 SV=1;	------	------	------
TRINITY_DN52345_c0_g1	ABC transporter ATP-binding protein ARB1-like [Quercus suber])	1.26	0.61	0.38	0	0	0	0.75	0	GO:0016887;GO:0005524	MF:ATPase activity;MF:ATP binding;	K06185	ABCF2	------	------	COG0488	S:Function unknown)	sp|P40024|ARB1_YEAST;	ABC transporter ATP-binding protein ARB1 OS=Saccharomyces cerevisiae;	PF00005;PF13304;PF02463;PF13555;PF03193;PF13191	ABC_tran;AAA_21;SMC_N;AAA_29;RsgA_GTPase;AAA_16	ABC transporter;AAA domain, putative AbiEii toxin, Type IV TA system;RecF/RecN/SMC N terminal domain;P-loop containing region of AAA domain;RsgA GTPase;AAA ATPase domain
TRINITY_DN71441_c0_g1	hypothetical protein Saspl_043876 [Salvia splendens])	0.35	1.04	0.86	0.83	0	0.72	0.75	0.516667	GO:0016021;GO:0016887;GO:0005524	CC:integral component of membrane;MF:ATPase activity;MF:ATP binding;	------	------	------	------	------	------	sp|Q6EQ60|AB47G_ORYSJ;	ABC transporter G family member 47 OS=Oryza sativa subsp. japonica OX=39947 GN=ABCG47 PE=3 SV=2;	------	------	------
TRINITY_DN44652_c0_g1	PREDICTED: ABC transporter F family member 1 [Juglans regia])	2	0.24	0	0.87	0	0	0.746667	0.29	GO:0016887;GO:0005524	MF:ATPase activity;MF:ATP binding;	K06185	ABCF2	------	------	COG0488	S:Function unknown)	sp|Q9FJH6|AB1F_ARATH;	ABC transporter F family member 1 OS=Arabidopsis thaliana OX=3702 GN=ABCF1 PE=2 SV=1;	------	------	------
TRINITY_DN37252_c0_g2	PREDICTED: ABC transporter B family member 19 isoform X2 [Camelina sativa])	0	1.98	0.25	1.43	0	4.31	0.743333	1.91333	GO:0048443;GO:0010218;GO:0009733;GO:0009639;GO:0009734;GO:0009637;GO:0043481;GO:0009926;GO:0010540;GO:0010541;GO:0008361;GO:0090691;GO:0055085;GO:0009640;GO:0009958;GO:0048364;GO:0048527;GO:0060918;GO:0016021;GO:0005886;GO:0005829;GO:0016887;GO:0042626;GO:0005524;GO:0010329	BP:stamen development;BP:response to far red light;BP:response to auxin;BP:response to red or far red light;BP:auxin-activated signaling pathway;BP:response to blue light;BP:anthocyanin accumulation in tissues in response to UV light;BP:auxin polar transport;BP:basipetal auxin transport;BP:acropetal auxin transport;BP:regulation of cell size;BP:formation of plant organ boundary;BP:transmembrane t…	K05658	ABCB1, CD243	map02010	ABC transporters)	COG1132	V:Defense mechanisms)	sp|Q9LJX0|AB19B_ARATH;	ABC transporter B family member 19 OS=Arabidopsis thaliana OX=3702 GN=ABCB19 PE=1 SV=1;	PF00664	ABC_membrane	ABC transporter transmembrane region
TRINITY_DN62587_c0_g4	NU+ prion formation protein 1-like [Quercus suber])	2.23	0	0	0	0	0	0.743333	0	GO:0016887;GO:0005524	MF:ATPase activity;MF:ATP binding;	K03235	EF3, TEF3	------	------	COG0488	K:Transcription)	sp|Q08972|NEW1_YEAST;	[NU+] prion formation protein 1 OS=Saccharomyces cerevisiae;	PF00005;PF13476;PF01926;PF13304;PF13555;PF03193;PF13521;PF10662	ABC_tran;AAA_23;MMR_HSR1;AAA_21;AAA_29;RsgA_GTPase;AAA_28;PduV-EutP	ABC transporter;AAA domain;50S ribosome-binding GTPase;AAA domain, putative AbiEii toxin, Type IV TA system;P-loop containing region of AAA domain;RsgA GTPase;AAA domain;Ethanolamine utilisation - propanediol utilisation
TRINITY_DN80480_c0_g2	ABC transporter C family member 12-like isoform X2 [Rhodamnia argentea])	0.94	1.12	0.15	0.43	0.07	0	0.736667	0.166667	GO:0016021;GO:0042626;GO:0016887;GO:0005524	CC:integral component of membrane;MF:ATPase activity, coupled to transmembrane movement of substances;MF:ATPase activity;MF:ATP binding;	------	------	------	------	------	------	sp|Q6FWS5|YBT1_CANGA;	Pleiotropic ABC efflux transporter of multiple drugs YBT1 OS=Candida glabrata;	PF00005;PF02463	ABC_tran;SMC_N	ABC transporter;RecF/RecN/SMC N terminal domain
TRINITY_DN34500_c0_g1	ABC transporter B family member 19 [Nymphaea thermarum])	0.4	1.42	0.38	0.8	0.46	4.11	0.733333	1.79	GO:0009733;GO:0048443;GO:0010540;GO:0009637;GO:0043481;GO:0009958;GO:0008361;GO:0090691;GO:0010218;GO:0010541;GO:0048527;GO:0055085;GO:0009640;GO:0016021;GO:0005886;GO:0042626;GO:0010329;GO:0016887;GO:0005524	BP:response to auxin;BP:stamen development;BP:basipetal auxin transport;BP:response to blue light;BP:anthocyanin accumulation in tissues in response to UV light;BP:positive gravitropism;BP:regulation of cell size;BP:formation of plant organ boundary;BP:response to far red light;BP:acropetal auxin transport;BP:lateral root development;BP:transmembrane transport;BP:photomorphogenesis;CC:integral co…	K05658	ABCB1, CD243	map02010	ABC transporters)	COG1132	V:Defense mechanisms)	sp|Q9LJX0|AB19B_ARATH;	ABC transporter B family member 19 OS=Arabidopsis thaliana OX=3702 GN=ABCB19 PE=1 SV=1;	PF00664;PF00005;PF02463;PF13191	ABC_membrane;ABC_tran;SMC_N;AAA_16	ABC transporter transmembrane region;ABC transporter;RecF/RecN/SMC N terminal domain;AAA ATPase domain
TRINITY_DN14054_c0_g3	hypothetical protein M569_01408, partial [Genlisea aurea])	0.48	1.54	0.17	1.87	0	0	0.73	0.623333	GO:0016021;GO:0042626;GO:0016887;GO:0005524	CC:integral component of membrane;MF:ATPase activity, coupled to transmembrane movement of substances;MF:ATPase activity;MF:ATP binding;	K05658	ABCB1, CD243	map02010	ABC transporters)	COG1132	V:Defense mechanisms)	sp|P21448|MDR1_CRIGR;	ATP-dependent translocase ABCB1 OS=Cricetulus griseus OX=10029 GN=ABCB1 PE=1 SV=2;	PF00664;PF00005;PF02463	ABC_membrane;ABC_tran;SMC_N	ABC transporter transmembrane region;ABC transporter;RecF/RecN/SMC N terminal domain
TRINITY_DN31494_c0_g2	hypothetical protein M569_04057, partial [Genlisea aurea])	1.08	0.65	0.46	0.21	2.06	1.46	0.73	1.24333	GO:0016021;GO:0016887;GO:0005524	CC:integral component of membrane;MF:ATPase activity;MF:ATP binding;	------	------	------	------	COG1131	V:Defense mechanisms)	sp|Q8RXN0|AB11G_ARATH;	ABC transporter G family member 11 OS=Arabidopsis thaliana OX=3702 GN=ABCG11 PE=1 SV=1;	PF19055;PF01061	ABC2_membrane_7;ABC2_membrane	ABC-2 type transporter;ABC-2 type transporter
TRINITY_DN16363_c0_g2	ABC transporter C family member 8-like isoform X1 [Abrus precatorius])	2.18	0	0	2.53	2.85	0	0.726667	1.79333	GO:0016021;GO:0042626;GO:0016887;GO:0005524	CC:integral component of membrane;MF:ATPase activity, coupled to transmembrane movement of substances;MF:ATPase activity;MF:ATP binding;	K05665	ABCC1	map02010	ABC transporters)	------	------	sp|Q8LGU1|AB8C_ARATH;	ABC transporter C family member 8 OS=Arabidopsis thaliana OX=3702 GN=ABCC8 PE=2 SV=3;	------	------	------
TRINITY_DN45944_c0_g1	leptomycin B resistance protein pmd1-like [Quercus suber])	2.18	0	0	0	0	4.65	0.726667	1.55	GO:0055085;GO:0016021;GO:0042626;GO:0016887;GO:0005524	BP:transmembrane transport;CC:integral component of membrane;MF:ATPase activity, coupled to transmembrane movement of substances;MF:ATPase activity;MF:ATP binding;	K05658	ABCB1, CD243	map02010	ABC transporters)	COG1132	S:Function unknown)	sp|Q9Y8G1|ATRD_EMEND;	ABC multidrug transporter atrD OS=Emericella nidulans OX=162425 GN=atrD PE=1 SV=1;	------	------	------
TRINITY_DN33518_c0_g2	hypothetical protein FH972_023382 [Carpinus fangiana])	0.32	1.83	0	0.92	0.19	0	0.716667	0.37	GO:1902001;GO:0016021;GO:0005779;GO:0042626;GO:0016887;GO:0005524	BP:fatty acid transmembrane transport;CC:integral component of membrane;CC:integral component of peroxisomal membrane;MF:ATPase activity, coupled to transmembrane movement of substances;MF:ATPase activity;MF:ATP binding;	K15628	PXA	map04146;map02010	Peroxisome);ABC transporters)	------	------	sp|F1RBC8|ABCD1_DANRE;	ATP-binding cassette sub-family D member 1 OS=Danio rerio OX=7955 GN=abcd1 PE=2 SV=1;	PF06472	ABC_membrane_2	ABC transporter transmembrane region 2
TRINITY_DN17134_c0_g1	ABC transporter G family member 11 [Pistacia vera])	0.67	0.66	0.81	0.43	0.74	1.04	0.713333	0.736667	GO:0016021;GO:0016887;GO:0005524;GO:0015419	CC:integral component of membrane;MF:ATPase activity;MF:ATP binding;MF:ATPase-coupled sulfate transmembrane transporter activity;	------	------	------	------	COG1131	S:Function unknown)	sp|Q8RXN0|AB11G_ARATH;	ABC transporter G family member 11 OS=Arabidopsis thaliana OX=3702 GN=ABCG11 PE=1 SV=1;	PF01061;PF00005;PF01926	ABC2_membrane;ABC_tran;MMR_HSR1	ABC-2 type transporter;ABC transporter;50S ribosome-binding GTPase
TRINITY_DN35615_c0_g1	PREDICTED: LOW QUALITY PROTEIN: ABC transporter C family member 8-like [Eucalyptus grandis])	0	0	2.14	2.03	0	0	0.713333	0.676667	GO:0016021;GO:0042626;GO:0016887;GO:0005524	CC:integral component of membrane;MF:ATPase activity, coupled to transmembrane movement of substances;MF:ATPase activity;MF:ATP binding;	K05665	ABCC1	map02010	ABC transporters)	COG1132	V:Defense mechanisms)	sp|Q8LGU1|AB8C_ARATH;	ABC transporter C family member 8 OS=Arabidopsis thaliana OX=3702 GN=ABCC8 PE=2 SV=3;	PF00005	ABC_tran	ABC transporter
TRINITY_DN22218_c0_g3	ABC transporter G family member 10-like [Elaeis guineensis])	0.28	1.85	0	0	0	0	0.71	0	GO:0055085;GO:0016021;GO:0005886;GO:0042626;GO:0016887;GO:0005524	BP:transmembrane transport;CC:integral component of membrane;CC:plasma membrane;MF:ATPase activity, coupled to transmembrane movement of substances;MF:ATPase activity;MF:ATP binding;	K21396	WHT	------	------	COG1131	J:Translation, ribosomal structure and biogenesis)	sp|Q7XA72|AB21G_ARATH;	ABC transporter G family member 21 OS=Arabidopsis thaliana OX=3702 GN=ABCG21 PE=2 SV=2;	PF00005;PF13191;PF03193;PF13401;PF13476;PF13555	ABC_tran;AAA_16;RsgA_GTPase;AAA_22;AAA_23;AAA_29	ABC transporter;AAA ATPase domain;RsgA GTPase;AAA domain;AAA domain;P-loop containing region of AAA domain
TRINITY_DN38155_c0_g3	hypothetical protein FH972_025233 [Carpinus fangiana])	2.03	0.05	0	0	0	0.92	0.693333	0.306667	GO:1902001;GO:0016021;GO:0005779;GO:0042626;GO:0016887;GO:0005524	BP:fatty acid transmembrane transport;CC:integral component of membrane;CC:integral component of peroxisomal membrane;MF:ATPase activity, coupled to transmembrane movement of substances;MF:ATPase activity;MF:ATP binding;	K15628	PXA	map04146;map02010	Peroxisome);ABC transporters)	------	------	sp|P41909|PXA1_YEAST;	Peroxisomal long-chain fatty acid import protein 2 OS=Saccharomyces cerevisiae;	PF06472	ABC_membrane_2	ABC transporter transmembrane region 2
TRINITY_DN18725_c0_g3	LOW QUALITY PROTEIN: ABC transporter B family member 19-like [Elaeis guineensis])	0.81	0.51	0.74	0.93	1.44	0.53	0.686667	0.966667	GO:0009733;GO:0048443;GO:0010540;GO:0009637;GO:0043481;GO:0009958;GO:0008361;GO:0090691;GO:0010218;GO:0010541;GO:0048527;GO:0055085;GO:0009640;GO:0016021;GO:0005886;GO:0042626;GO:0010329;GO:0016887;GO:0005524	BP:response to auxin;BP:stamen development;BP:basipetal auxin transport;BP:response to blue light;BP:anthocyanin accumulation in tissues in response to UV light;BP:positive gravitropism;BP:regulation of cell size;BP:formation of plant organ boundary;BP:response to far red light;BP:acropetal auxin transport;BP:lateral root development;BP:transmembrane transport;BP:photomorphogenesis;CC:integral co…	K05658	ABCB1, CD243	map02010	ABC transporters)	COG1132	V:Defense mechanisms)	sp|Q9LJX0|AB19B_ARATH;	ABC transporter B family member 19 OS=Arabidopsis thaliana OX=3702 GN=ABCB19 PE=1 SV=1;	PF00664	ABC_membrane	ABC transporter transmembrane region
TRINITY_DN83756_c0_g7	uncharacterized protein LOC110437315 [Sorghum bicolor])	1.17	0.86	0	0.34	0.7	0	0.676667	0.346667	GO:0003964;GO:0004523;GO:0003676	MF:RNA-directed DNA polymerase activity;MF:RNA-DNA hybrid ribonuclease activity;MF:nucleic acid binding;	K05641	ABCA1	map02010	ABC transporters)	ENOG410Y65V;ENOG410XS82;ENOG4111K5V;COG0520	S:Function unknown);	sp|P14381|YTX2_XENLA;	Transposon TX1 uncharacterized 149 kDa protein OS=Xenopus laevis OX=8355 PE=4 SV=1;	PF00078	RVT_1	Reverse transcriptase (RNA-dependent DNA polymerase)
TRINITY_DN38025_c0_g1	protein pyrABCN-like [Quercus suber])	0.76	1.22	0	0.61	0.35	0	0.66	0.32	GO:0044205;GO:0006207;GO:0006520;GO:0016036;GO:0006807;GO:0005737;GO:0005634;GO:0009570;GO:0009507;GO:0005829;GO:0003700;GO:0003677;GO:0016597;GO:0004070	BP:'de novo' UMP biosynthetic process;BP:'de novo' pyrimidine nucleobase biosynthetic process;BP:cellular amino acid metabolic process;BP:cellular response to phosphate starvation;BP:nitrogen compound metabolic process;CC:cytoplasm;CC:nucleus;CC:chloroplast stroma;CC:chloroplast;CC:cytosol;MF:transcription factor activity, sequence-specific DNA binding;MF:DNA binding;MF:amino acid binding;MF:aspa…	K11541	URA2	map00240;map00250	Pyrimidine metabolism);Alanine, aspartate and glutamate metabolism)	------	------	sp|Q09794|PYR1_SCHPO;	Protein ura1 OS=Schizosaccharomyces pombe;	PF02729;PF00185	OTCace_N;OTCace	Aspartate/ornithine carbamoyltransferase, carbamoyl-P binding domain;Aspartate/ornithine carbamoyltransferase, Asp/Orn binding domain
TRINITY_DN10851_c0_g4	NAD(P)-binding Rossmann-fold superfamily protein [Prunus dulcis])	1.56	0.14	0.26	0.26	0.85	0.59	0.653333	0.566667	GO:0015074;GO:0008270;GO:0003676	BP:DNA integration;MF:zinc ion binding;MF:nucleic acid binding;	K03006;K05666	RPB1, POLR2A;ABCC2	map03020;map02010	RNA polymerase);ABC transporters)	ENOG410ZXEB;ENOG410XS4D;ENOG410Y4C5;COG2801	S:Function unknown);	sp|P10978|POLX_TOBAC;	Retrovirus-related Pol polyprotein from transposon TNT 1-94 OS=Nicotiana tabacum OX=4097 PE=2 SV=1;	------	------	------
TRINITY_DN53277_c0_g2	LOW QUALITY PROTEIN: ATP-dependent bile acid permease-like [Quercus suber])	0.83	0.8	0.33	1.12	0.81	0	0.653333	0.643333	GO:0016021;GO:0042626;GO:0016887;GO:0005524	CC:integral component of membrane;MF:ATPase activity, coupled to transmembrane movement of substances;MF:ATPase activity;MF:ATP binding;	------	------	------	------	COG1132	O:Posttranslational modification, protein turnover, chaperones)	sp|P32386|YBT1_YEAST;	ATP-dependent bile acid permease OS=Saccharomyces cerevisiae;	PF00664	ABC_membrane	ABC transporter transmembrane region
TRINITY_DN31494_c0_g3	ABC transporter G family member 11 isoform D [Glycine soja])	0.55	0.59	0.81	0.63	0.95	1.49	0.65	1.02333	GO:0009737;GO:0009611;GO:0010588;GO:0080051;GO:0009651;GO:0010222;GO:0055085;GO:0009897;GO:0016021;GO:0005886;GO:0042626;GO:0016887;GO:0005524;GO:0042803	BP:response to abscisic acid;BP:response to wounding;BP:cotyledon vascular tissue pattern formation;BP:cutin transport;BP:response to salt stress;BP:stem vascular tissue pattern formation;BP:transmembrane transport;CC:external side of plasma membrane;CC:integral component of membrane;CC:plasma membrane;MF:ATPase activity, coupled to transmembrane movement of substances;MF:ATPase activity;MF:ATP b…	------	------	------	------	COG1131	V:Defense mechanisms)	sp|Q8RXN0|AB11G_ARATH;	ABC transporter G family member 11 OS=Arabidopsis thaliana OX=3702 GN=ABCG11 PE=1 SV=1;	PF01061	ABC2_membrane	ABC-2 type transporter
TRINITY_DN35411_c2_g1	unnamed protein product [Microthlaspi erraticum])	0.47	1.34	0.14	0.94	0	0	0.65	0.313333	------	------	------	------	------	------	------	------	------	------	PF01926;PF04548;PF00005;PF03193	MMR_HSR1;AIG1;ABC_tran;RsgA_GTPase	50S ribosome-binding GTPase;AIG1 family;ABC transporter;RsgA GTPase
TRINITY_DN49204_c0_g1		0	1.95	0	0	0	0	0.65	0	------	------	K05660;K05658	ABCB5;ABCB1, CD243	map02010	ABC transporters)	COG1132	S:Function unknown)	sp|P21448|MDR1_CRIGR;	ATP-dependent translocase ABCB1 OS=Cricetulus griseus OX=10029 GN=ABCB1 PE=1 SV=2;	PF00664	ABC_membrane	ABC transporter transmembrane region
TRINITY_DN81597_c0_g1	ABC1 family protein C10F6.14c-like [Quercus suber])	0.49	1.32	0.12	0.8	0.23	0	0.643333	0.343333	------	------	K08869	ADCK, ABC1	------	------	COG0661	S:Function unknown)	sp|A0A179HKZ8|LCSO_PURLI;	ABC1 family protein lscO OS=Purpureocillium lilacinum OX=33203 GN=lcsO PE=2 SV=1;	------	------	------
TRINITY_DN101114_c0_g1	melanotransferrin-like [Rhodamnia argentea])	0.69	0.81	0.42	1.27	1.01	0.87	0.64	1.05	------	------	K14736	TF	------	------	ENOG410XQ36	U:Intracellular trafficking, secretion, and vesicular transport)	sp|P80426|TRFE1_SALSA;	Serotransferrin-1 OS=Salmo salar OX=8030 GN=tf1 PE=1 SV=1;	PF00405;PF12974	Transferrin;Phosphonate-bd	Transferrin;ABC transporter, phosphonate, periplasmic substrate-binding protein
TRINITY_DN63435_c0_g1	PREDICTED: uncharacterized protein LOC104752695 [Camelina sativa])	0.52	0.6	0.75	1.57	0.12	0.21	0.623333	0.633333	GO:0006281;GO:0006418;GO:0045717;GO:0016021;GO:0009506;GO:0005886;GO:0005634;GO:0005829;GO:0004812;GO:0004519;GO:0003677;GO:0003964;GO:0005524	BP:DNA repair;BP:tRNA aminoacylation for protein translation;BP:negative regulation of fatty acid biosynthetic process;CC:integral component of membrane;CC:plasmodesma;CC:plasma membrane;CC:nucleus;CC:cytosol;MF:aminoacyl-tRNA ligase activity;MF:endonuclease activity;MF:DNA binding;MF:RNA-directed DNA polymerase activity;MF:ATP binding;	K05641	ABCA1	map02010	ABC transporters)	ENOG410ZPXB;ENOG4111K5V;ENOG410Y65V	S:Function unknown);	sp|P14381|YTX2_XENLA;	Transposon TX1 uncharacterized 149 kDa protein OS=Xenopus laevis OX=8355 PE=4 SV=1;	PF00078	RVT_1	Reverse transcriptase (RNA-dependent DNA polymerase)
TRINITY_DN62587_c0_g1	NU+ prion formation protein 1-like [Quercus suber])	0.83	0	1.01	0	0	0	0.613333	0	GO:0016887;GO:0005524	MF:ATPase activity;MF:ATP binding;	K03235	EF3, TEF3	------	------	COG0488	K:Transcription)	sp|Q08972|NEW1_YEAST;	[NU+] prion formation protein 1 OS=Saccharomyces cerevisiae;	PF00005	ABC_tran	ABC transporter
TRINITY_DN16529_c0_g2	PREDICTED: ABC transporter C family member 8 isoform X2 [Musa acuminata subsp. malaccensis])	0.47	0.81	0.55	0.81	0.31	0.92	0.61	0.68	GO:0016021;GO:0042626;GO:0016887;GO:0005524	CC:integral component of membrane;MF:ATPase activity, coupled to transmembrane movement of substances;MF:ATPase activity;MF:ATP binding;	K05665	ABCC1	map02010	ABC transporters)	COG1132	V:Defense mechanisms)	sp|Q8LGU1|AB8C_ARATH;	ABC transporter C family member 8 OS=Arabidopsis thaliana OX=3702 GN=ABCC8 PE=2 SV=3;	PF00005	ABC_tran	ABC transporter
TRINITY_DN41461_c0_g3	two-component sensor protein histidine protein kinase, putative, partial [Ricinus communis])	0.78	1.05	0	3.06	0	0	0.61	1.02	GO:0000160;GO:0046777;GO:0009736;GO:0016021;GO:0005887;GO:0005886;GO:0004673;GO:0000155;GO:0016301;GO:0009927	BP:phosphorelay signal transduction system;BP:protein autophosphorylation;BP:cytokinin-activated signaling pathway;CC:integral component of membrane;CC:integral component of plasma membrane;CC:plasma membrane;MF:protein histidine kinase activity;MF:phosphorelay sensor kinase activity;MF:kinase activity;MF:histidine phosphotransfer kinase activity;	K02030	ABC.PA.S	------	------	ENOG410XNMH	T:Signal transduction mechanisms)	sp|A2YA15|OHK2_ORYSI;	Probable histidine kinase 2 OS=Oryza sativa subsp. indica OX=39946 GN=HK2 PE=3 SV=1;	PF00072	Response_reg	Response regulator receiver domain
TRINITY_DN50985_c0_g1	hypothetical protein FH972_025509 [Carpinus fangiana])	0.39	0.95	0.47	0.46	0	0	0.603333	0.153333	GO:0016021;GO:0042626;GO:0016887;GO:0005524	CC:integral component of membrane;MF:ATPase activity, coupled to transmembrane movement of substances;MF:ATPase activity;MF:ATP binding;	K23329;K05661	HMT1, ACLQ;ABCB6	map02010	ABC transporters)	COG5265	M:Cell wall/membrane/envelope biogenesis)	sp|Q02592|HMT1_SCHPO;	Heavy metal tolerance protein OS=Schizosaccharomyces pombe;	PF00664	ABC_membrane	ABC transporter transmembrane region
TRINITY_DN15627_c0_g1	hypothetical protein AMTR_s00507p00011670 [Amborella trichopoda])	1.8	0	0	3.18	2.28	1.88	0.6	2.44667	GO:0055085;GO:0016021;GO:0016020;GO:0000325;GO:0005774;GO:0042626;GO:0016887;GO:0005524	BP:transmembrane transport;CC:integral component of membrane;CC:membrane;CC:plant-type vacuole;CC:vacuolar membrane;MF:ATPase activity, coupled to transmembrane movement of substances;MF:ATPase activity;MF:ATP binding;	K05665	ABCC1	map02010	ABC transporters)	COG1132	V:Defense mechanisms)	sp|Q8LGU1|AB8C_ARATH;	ABC transporter C family member 8 OS=Arabidopsis thaliana OX=3702 GN=ABCC8 PE=2 SV=3;	PF00005	ABC_tran	ABC transporter
TRINITY_DN100033_c0_g1	ATP-binding cassette, subfamily F, member 2 [Salvia splendens])	1.78	0	0	0	0	1.45	0.593333	0.483333	GO:0005886;GO:0016887;GO:0005524	CC:plasma membrane;MF:ATPase activity;MF:ATP binding;	K06185	ABCF2	------	------	------	------	sp|O42943|YBP8_SCHPO;	Uncharacterized ABC transporter ATP-binding protein C16H5.08c OS=Schizosaccharomyces pombe;	PF00005	ABC_tran	ABC transporter
TRINITY_DN21950_c0_g6	Retrovirus-related Pol polyprotein from transposon TNT 1-94 [Apostasia shenzhenica])	0.76	0.73	0.25	0.48	0.4	0.14	0.58	0.34	GO:0015074;GO:0016787;GO:0008270;GO:0003676	BP:DNA integration;MF:hydrolase activity;MF:zinc ion binding;MF:nucleic acid binding;	K05666	ABCC2	map02010	ABC transporters)	ENOG410XS4D;ENOG410ZXEB;COG2801	S:Function unknown);L:Replication, recombination and repair)	sp|P10978|POLX_TOBAC;	Retrovirus-related Pol polyprotein from transposon TNT 1-94 OS=Nicotiana tabacum OX=4097 PE=2 SV=1;	------	------	------
TRINITY_DN28165_c0_g4	ABC transporter G family member 7 [Nymphaea colorata])	0.46	0.52	0.73	0	0.09	1.53	0.57	0.54	GO:0055085;GO:0016021;GO:0005886;GO:0042626;GO:0016887;GO:0005524	BP:transmembrane transport;CC:integral component of membrane;CC:plasma membrane;MF:ATPase activity, coupled to transmembrane movement of substances;MF:ATPase activity;MF:ATP binding;	------	------	------	------	COG1131	V:Defense mechanisms)	sp|Q55GB1|ABCGF_DICDI;	ABC transporter G family member 15 OS=Dictyostelium discoideum OX=44689 GN=abcG15 PE=3 SV=1;	PF00005;PF03193	ABC_tran;RsgA_GTPase	ABC transporter;RsgA GTPase
TRINITY_DN53162_c0_g2	ATP-dependent bile acid permease-like [Quercus suber])	0.71	0.88	0.12	1.41	0.12	0	0.57	0.51	GO:0016021;GO:0051087;GO:0042626;GO:0016887;GO:0005524	CC:integral component of membrane;MF:chaperone binding;MF:ATPase activity, coupled to transmembrane movement of substances;MF:ATPase activity;MF:ATP binding;	------	------	------	------	------	------	sp|P32386|YBT1_YEAST;	ATP-dependent bile acid permease OS=Saccharomyces cerevisiae;	PF00005;PF02463;PF13304	ABC_tran;SMC_N;AAA_21	ABC transporter;RecF/RecN/SMC N terminal domain;AAA domain, putative AbiEii toxin, Type IV TA system
TRINITY_DN90560_c1_g1	hypothetical protein D5086_0000234900 [Populus alba])	0.85	0.85	0	2	0	0	0.566667	0.666667	GO:0016021;GO:0016887;GO:0005524	CC:integral component of membrane;MF:ATPase activity;MF:ATP binding;	------	------	------	------	COG1131	S:Function unknown)	sp|P10090|WHITE_DROME;	Protein white OS=Drosophila melanogaster OX=7227 GN=w PE=2 SV=2;	PF19055	ABC2_membrane_7	ABC-2 type transporter
TRINITY_DN54592_c0_g1	unknown [Picea sitchensis])	0	1.67	0	0	10.61	0	0.556667	3.53667	GO:0016887;GO:0005524	MF:ATPase activity;MF:ATP binding;	K06174	ABCE1, Rli1	------	------	COG1245	S:Function unknown)	sp|P61221|ABCE1_HUMAN;	ATP-binding cassette sub-family E member 1 OS=Homo sapiens OX=9606 GN=ABCE1 PE=1 SV=1;	------	------	------
TRINITY_DN57829_c0_g8	ABC transporter B family member 11-like [Phalaenopsis equestris])	0.72	0.52	0.43	1.68	0.21	0	0.556667	0.63	GO:0055085;GO:0016021;GO:0042626;GO:0016887;GO:0005524	BP:transmembrane transport;CC:integral component of membrane;MF:ATPase activity, coupled to transmembrane movement of substances;MF:ATPase activity;MF:ATP binding;	cmt;K05658	;ABCB1, CD243	map02010	ABC transporters)	COG1132	V:Defense mechanisms)	sp|Q54BT3|ABCB2_DICDI;	ABC transporter B family member 2 OS=Dictyostelium discoideum OX=44689 GN=abcB2 PE=3 SV=1;	PF00664	ABC_membrane	ABC transporter transmembrane region
TRINITY_DN63572_c0_g3	mitochondrial escape protein 2-like [Quercus suber])	0.42	1.25	0	1.48	0.52	0	0.556667	0.666667	GO:0000002;GO:0031305;GO:0003723	BP:mitochondrial genome maintenance;CC:integral component of mitochondrial inner membrane;MF:RNA binding;	------	------	------	------	ENOG410XQS2	A:RNA processing and modification)	sp|O94689|YME2_SCHPO;	Mitochondrial escape protein 2 OS=Schizosaccharomyces pombe;	PF10443;PF01637;PF03193;PF13191;PF00005;PF13479;PF02463;PF07693	RNA12;ATPase_2;RsgA_GTPase;AAA_16;ABC_tran;AAA_24;SMC_N;KAP_NTPase	RNA12 protein;ATPase domain predominantly from Archaea;RsgA GTPase;AAA ATPase domain;ABC transporter;AAA domain;RecF/RecN/SMC N terminal domain;KAP family P-loop domain
TRINITY_DN16529_c0_g1	PREDICTED: ABC transporter C family member 10-like [Erythranthe guttata])	0.16	0.62	0.87	0.38	0.09	1.13	0.55	0.533333	GO:0055085;GO:0016021;GO:0016020;GO:0000325;GO:0005774;GO:0042626;GO:0016887;GO:0005524	BP:transmembrane transport;CC:integral component of membrane;CC:membrane;CC:plant-type vacuole;CC:vacuolar membrane;MF:ATPase activity, coupled to transmembrane movement of substances;MF:ATPase activity;MF:ATP binding;	K05665	ABCC1	map02010	ABC transporters)	COG1132	V:Defense mechanisms)	sp|Q8LGU1|AB8C_ARATH;	ABC transporter C family member 8 OS=Arabidopsis thaliana OX=3702 GN=ABCC8 PE=2 SV=3;	------	------	------
TRINITY_DN22344_c0_g4	MDR-like ABC transporter [Ginkgo biloba])	0.45	0.86	0.32	0.42	1.77	0.36	0.543333	0.85	GO:0055085;GO:0016021;GO:0042626;GO:0016887;GO:0005524	BP:transmembrane transport;CC:integral component of membrane;MF:ATPase activity, coupled to transmembrane movement of substances;MF:ATPase activity;MF:ATP binding;	K05658	ABCB1, CD243	map02010	ABC transporters)	COG1132	V:Defense mechanisms)	sp|Q9C7F8|AB13B_ARATH;	ABC transporter B family member 13 OS=Arabidopsis thaliana OX=3702 GN=ABCB13 PE=3 SV=1;	PF00005	ABC_tran	ABC transporter
TRINITY_DN28458_c1_g1	ABC transporter C family member 8-like isoform X2 [Hevea brasiliensis])	0	0.7	0.85	0.82	0	0	0.516667	0.273333	GO:0016021;GO:0042626;GO:0016887;GO:0005524	CC:integral component of membrane;MF:ATPase activity, coupled to transmembrane movement of substances;MF:ATPase activity;MF:ATP binding;	K05666	ABCC2	map02010	ABC transporters)	------	------	------	------	PF00005	ABC_tran	ABC transporter
TRINITY_DN94092_c0_g1	hypothetical protein FH972_023382 [Carpinus fangiana])	0.8	0.33	0.41	0.13	0	1.35	0.513333	0.493333	GO:1902001;GO:0005779;GO:0042626;GO:0016887;GO:0005524	BP:fatty acid transmembrane transport;CC:integral component of peroxisomal membrane;MF:ATPase activity, coupled to transmembrane movement of substances;MF:ATPase activity;MF:ATP binding;	K05677	ABCD3, PMP70	map04146;map02010	Peroxisome);ABC transporters)	COG4178	Z:Cytoskeleton)	sp|Q8T8P3|ABCD2_DICDI;	ABC transporter D family member 2 OS=Dictyostelium discoideum OX=44689 GN=abcD2 PE=3 SV=1;	PF06472	ABC_membrane_2	ABC transporter transmembrane region 2
TRINITY_DN45543_c0_g3	NU+ prion formation protein 1-like [Quercus suber])	0	0	1.53	0	0	0.65	0.51	0.216667	GO:0016887;GO:0005524	MF:ATPase activity;MF:ATP binding;	K03235	EF3, TEF3	------	------	------	------	sp|O14134|ELF1_SCHPO;	mRNA export factor elf1 OS=Schizosaccharomyces pombe;	PF00005	ABC_tran	ABC transporter
TRINITY_DN50426_c0_g2	metal resistance protein YCF1-like [Quercus suber])	0.24	1.14	0.14	0.82	0	0	0.506667	0.273333	GO:0016021;GO:0042626;GO:0016887;GO:0005524	CC:integral component of membrane;MF:ATPase activity, coupled to transmembrane movement of substances;MF:ATPase activity;MF:ATP binding;	K05665	ABCC1	map02010	ABC transporters)	COG1132	S:Function unknown)	sp|Q5F364|MRP1_CHICK;	Multidrug resistance-associated protein 1 OS=Gallus gallus OX=9031 GN=ABCC1 PE=2 SV=1;	PF00005;PF03193;PF01926	ABC_tran;RsgA_GTPase;MMR_HSR1	ABC transporter;RsgA GTPase;50S ribosome-binding GTPase
TRINITY_DN54063_c0_g1		0	1.52	0	0.15	5.41	0	0.506667	1.85333	------	------	K02016	ABC.FEV.S	------	------	ENOG410XRC7	P:Inorganic ion transport and metabolism)	------	------	------	------	------
TRINITY_DN22344_c0_g2	MDR-like ABC transporter [Ginkgo biloba])	0.06	1.45	0	0.39	1.1	0.56	0.503333	0.683333	GO:0055085;GO:0016021;GO:0042626;GO:0016887;GO:0005524	BP:transmembrane transport;CC:integral component of membrane;MF:ATPase activity, coupled to transmembrane movement of substances;MF:ATPase activity;MF:ATP binding;	K05658	ABCB1, CD243	map02010	ABC transporters)	COG1132	V:Defense mechanisms)	sp|Q8LPK2|AB2B_ARATH;	ABC transporter B family member 2 OS=Arabidopsis thaliana OX=3702 GN=ABCB2 PE=1 SV=3;	PF00664;PF00005;PF01935;PF06414	ABC_membrane;ABC_tran;DUF87;Zeta_toxin	ABC transporter transmembrane region;ABC transporter;Helicase HerA, central domain;Zeta toxin
TRINITY_DN31710_c0_g2	ABC transporter D family member 1 [Prosopis alba])	0	0.52	0.97	0	0.32	0.27	0.496667	0.196667	GO:0015916;GO:0006744;GO:0010030;GO:0046861;GO:0016021;GO:0042626;GO:0005524;GO:0016887	BP:fatty-acyl-CoA transport;BP:ubiquinone biosynthetic process;BP:positive regulation of seed germination;CC:glyoxysomal membrane;CC:integral component of membrane;MF:ATPase activity, coupled to transmembrane movement of substances;MF:ATP binding;MF:ATPase activity;	------	------	------	------	COG4178	S:Function unknown)	sp|Q94FB9|AB1D_ARATH;	ABC transporter D family member 1 OS=Arabidopsis thaliana OX=3702 GN=ABCD1 PE=1 SV=1;	PF06472	ABC_membrane_2	ABC transporter transmembrane region 2
TRINITY_DN51897_c0_g1	ABC transporter G family member 42-like [Nymphaea colorata])	0.66	0.48	0.35	0.59	1.09	0.22	0.496667	0.633333	GO:0005634;GO:0016021;GO:0051287;GO:0004471;GO:0008270;GO:0016887;GO:0003677;GO:0005524	CC:nucleus;CC:integral component of membrane;MF:NAD binding;MF:malate dehydrogenas;MF:zinc ion binding;MF:ATPase activity;MF:DNA binding;MF:ATP binding;	------	------	------	------	COG0842	V:Defense mechanisms)	sp|Q94A18|AB29G_ARATH;	ABC transporter G family member 29 OS=Arabidopsis thaliana OX=3702 GN=ABCG29 PE=2 SV=2;	PF01061	ABC2_membrane	ABC-2 type transporter
TRINITY_DN28018_c0_g2	hypothetical protein Lal_00012825 [Lupinus albus])	0.11	1.31	0	1.83	0	0	0.473333	0.61	GO:0055085;GO:0016021;GO:0016020;GO:0000325;GO:0005774;GO:0042626;GO:0016887;GO:0005524	BP:transmembrane transport;CC:integral component of membrane;CC:membrane;CC:plant-type vacuole;CC:vacuolar membrane;MF:ATPase activity, coupled to transmembrane movement of substances;MF:ATPase activity;MF:ATP binding;	------	------	------	------	------	------	sp|G4N2B5|ABC7_MAGO7;	ABC transporter 7 OS=Magnaporthe oryzae;	PF00005	ABC_tran	ABC transporter
TRINITY_DN48053_c0_g1	hypothetical protein AMTR_s00263p00014290 [Amborella trichopoda])	0	1.39	0	0	0	5.73	0.463333	1.91	GO:0055085;GO:0000325;GO:0016021;GO:0016020;GO:0005774;GO:0042626;GO:0016887;GO:0005524	BP:transmembrane transport;CC:plant-type vacuole;CC:integral component of membrane;CC:membrane;CC:vacuolar membrane;MF:ATPase activity, coupled to transmembrane movement of substances;MF:ATPase activity;MF:ATP binding;	------	------	------	------	COG1132	V:Defense mechanisms)	sp|Q8LGU1|AB8C_ARATH;	ABC transporter C family member 8 OS=Arabidopsis thaliana OX=3702 GN=ABCC8 PE=2 SV=3;	------	------	------
TRINITY_DN45543_c0_g4	NU+ prion formation protein 1-like [Quercus suber])	0	0	1.37	0	0	2.12	0.456667	0.706667	GO:0016021;GO:0016887;GO:0005524	CC:integral component of membrane;MF:ATPase activity;MF:ATP binding;	K03235	EF3, TEF3	------	------	------	------	sp|O14134|ELF1_SCHPO;	mRNA export factor elf1 OS=Schizosaccharomyces pombe;	PF00005;PF00385	ABC_tran;Chromo	ABC transporter;Chromo (CHRromatin Organisation MOdifier) domain
TRINITY_DN15249_c0_g1	hypothetical protein F0562_016804 [Nyssa sinensis])	0.52	0.48	0.36	0.11	0.67	12.22	0.453333	4.33333	GO:0055085;GO:0016021;GO:0005886;GO:0042626;GO:0016887;GO:0005524	BP:transmembrane transport;CC:integral component of membrane;CC:plasma membrane;MF:ATPase activity, coupled to transmembrane movement of substances;MF:ATPase activity;MF:ATP binding;	------	------	------	------	COG0842;COG0465	S:Function unknown);	sp|Q949G3|PDR1_NICPL;	Pleiotropic drug resistance protein 1 OS=Nicotiana plumbaginifolia OX=4092 GN=PDR1 PE=1 SV=1;	PF00005;PF14510;PF13481	ABC_tran;ABC_trans_N;AAA_25	ABC transporter;ABC-transporter N-terminal;AAA domain
TRINITY_DN48420_c1_g1	ATP-binding cassette sub-family D member 1-like [Quercus suber])	0.94	0.18	0.23	0.22	0	0.94	0.45	0.386667	GO:1902001;GO:0016021;GO:0005779;GO:0042626;GO:0016887;GO:0005524	BP:fatty acid transmembrane transport;CC:integral component of membrane;CC:integral component of peroxisomal membrane;MF:ATPase activity, coupled to transmembrane movement of substances;MF:ATPase activity;MF:ATP binding;	K05677;K15628	ABCD3, PMP70;PXA	map04146;map02010	Peroxisome);ABC transporters)	COG4178	S:Function unknown)	sp|Q8T8P3|ABCD2_DICDI;	ABC transporter D family member 2 OS=Dictyostelium discoideum OX=44689 GN=abcD2 PE=3 SV=1;	PF00005	ABC_tran	ABC transporter
TRINITY_DN54592_c0_g2	ABC transporter E family member 2-like isoform X1 [Phoenix dactylifera])	0.84	0	0.51	0	1.03	0	0.45	0.343333	GO:0006415;GO:0000054;GO:0006413;GO:0016887;GO:0005506;GO:0043024;GO:0005524	BP:translational termination;BP:ribosomal subunit export from nucleus;BP:translational initiation;MF:ATPase activity;MF:iron ion binding;MF:ribosomal small subunit binding;MF:ATP binding;	K06174	ABCE1, Rli1	------	------	COG1245	S:Function unknown)	sp|P61221|ABCE1_HUMAN;	ATP-binding cassette sub-family E member 1 OS=Homo sapiens OX=9606 GN=ABCE1 PE=1 SV=1;	PF00005;PF02463	ABC_tran;SMC_N	ABC transporter;RecF/RecN/SMC N terminal domain
TRINITY_DN76667_c0_g1	hypothetical protein CUMW_217170 [Citrus unshiu])	1.23	0	0	2.89	3.16	0	0.41	2.01667	GO:0016021;GO:0016887;GO:0005524	CC:integral component of membrane;MF:ATPase activity;MF:ATP binding;	------	------	------	------	------	------	sp|Q6YW62|AB44G_ORYSJ;	ABC transporter G family member 44 OS=Oryza sativa subsp. japonica OX=39947 GN=ABCG44 PE=2 SV=2;	------	------	------
TRINITY_DN17258_c0_g3	ABC transporter G family member 36 [Cinnamomum micranthum f. kanehirae])	0.55	0	0.67	0.97	0	0	0.406667	0.323333	GO:0016021;GO:0016887;GO:0005524	CC:integral component of membrane;MF:ATPase activity;MF:ATP binding;	------	------	------	------	COG0842	V:Defense mechanisms)	sp|Q8GU88|AB39G_ORYSJ;	ABC transporter G family member 39 OS=Oryza sativa subsp. japonica OX=39947 GN=ABCG39 PE=3 SV=1;	------	------	------
TRINITY_DN73094_c0_g1	cysteine-rich receptor-like protein kinase, partial [Trifolium pratense])	0	0.29	0.91	0.35	0	1.52	0.4	0.623333	GO:0009058;GO:0016021;GO:0016301;GO:0003964;GO:0016874;GO:0005524	BP:biosynthetic process;CC:integral component of membrane;MF:kinase activity;MF:RNA-directed DNA polymerase activity;MF:ligase activity;MF:ATP binding;	K19941;K13912;K05641	SYN;DMBT1;ABCA1	map02010	ABC transporters)	ENOG4111K5V;ENOG410XS82;ENOG410Y9TZ;ENOG4111MK6	S:Function unknown);	sp|P14381|YTX2_XENLA;	Transposon TX1 uncharacterized 149 kDa protein OS=Xenopus laevis OX=8355 PE=4 SV=1;	PF00078	RVT_1	Reverse transcriptase (RNA-dependent DNA polymerase)
TRINITY_DN28165_c0_g3	ABC transporter G family member 15-like [Carica papaya])	1.16	0	0	0	0	3.66	0.386667	1.22	GO:0055085;GO:0016021;GO:0005886;GO:0042626;GO:0016887;GO:0005524	BP:transmembrane transport;CC:integral component of membrane;CC:plasma membrane;MF:ATPase activity, coupled to transmembrane movement of substances;MF:ATPase activity;MF:ATP binding;	------	------	------	------	COG1131	V:Defense mechanisms)	sp|Q9C8J8|AB13G_ARATH;	ABC transporter G family member 13 OS=Arabidopsis thaliana OX=3702 GN=ABCG13 PE=2 SV=1;	PF19055	ABC2_membrane_7	ABC-2 type transporter
TRINITY_DN6622_c0_g4	uncharacterized protein LOC18440724 isoform X2 [Amborella trichopoda])	0.55	0.4	0.2	1.11	0.29	0.66	0.383333	0.686667	GO:0005794;GO:0005783;GO:0005886;GO:0016301	CC:Golgi apparatus;CC:endoplasmic reticulum;CC:plasma membrane;MF:kinase activity;	K08869	ADCK, ABC1	------	------	COG0661;COG0661;COG0661	D:Cell cycle control, cell division, chromosome partitioning);K:Transcription);L:Replication, recombination and repair)	------	------	------	------	------
TRINITY_DN37451_c0_g2	ABC transporter C family member 2-like isoform X1 [Helianthus annuus])	0.28	0.83	0	0.66	0	0	0.37	0.22	GO:0016021;GO:0016887;GO:0005524;GO:0042626	CC:integral component of membrane;MF:ATPase activity;MF:ATP binding;MF:ATPase activity, coupled to transmembrane movement of substances;	K05665	ABCC1	map02010	ABC transporters)	COG1132	S:Function unknown)	sp|Q9C8G9|AB1C_ARATH;	ABC transporter C family member 1 OS=Arabidopsis thaliana OX=3702 GN=ABCC1 PE=1 SV=1;	------	------	------
TRINITY_DN50926_c0_g1	ABC transporter G family member 15.4 [Cinnamomum micranthum f. kanehirae])	0	1.1	0	0	0.69	0.57	0.366667	0.42	GO:0009737;GO:0009611;GO:0010222;GO:0080051;GO:0009651;GO:0010588;GO:0009897;GO:0016021;GO:0016887;GO:0005524;GO:0042803	BP:response to abscisic acid;BP:response to wounding;BP:stem vascular tissue pattern formation;BP:cutin transport;BP:response to salt stress;BP:cotyledon vascular tissue pattern formation;CC:external side of plasma membrane;CC:integral component of membrane;MF:ATPase activity;MF:ATP binding;MF:protein homodimerization activity;	------	------	------	------	COG1131	V:Defense mechanisms)	sp|Q8RWI9|AB15G_ARATH;	ABC transporter G family member 15 OS=Arabidopsis thaliana OX=3702 GN=ABCG15 PE=2 SV=2;	------	------	------
TRINITY_DN93805_c0_g1	hypothetical protein EUTSA_v10006558mg [Eutrema salsugineum])	1.1	0	0	0	0	1.14	0.366667	0.38	GO:0016021;GO:0042626;GO:0016887;GO:0005524	CC:integral component of membrane;MF:ATPase activity, coupled to transmembrane movement of substances;MF:ATPase activity;MF:ATP binding;	------	------	------	------	------	------	sp|Q63120|MRP2_RAT;	Canalicular multispecific organic anion transporter 1 OS=Rattus norvegicus OX=10116 GN=Abcc2 PE=1 SV=1;	PF00005	ABC_tran	ABC transporter
TRINITY_DN66524_c1_g1	hypothetical protein FH972_023597 [Carpinus fangiana])	1.05	0	0	1.85	0	0	0.35	0.616667	GO:0055085;GO:0016021;GO:0042626;GO:0016887;GO:0005524	BP:transmembrane transport;CC:integral component of membrane;MF:ATPase activity, coupled to transmembrane movement of substances;MF:ATPase activity;MF:ATP binding;	K05658	ABCB1, CD243	map02010	ABC transporters)	------	------	sp|A0A059JJ46|MDR2_TRIIM;	ABC multidrug transporter MDR2 OS=Trichophyton interdigitale;	PF00005;PF13304;PF13555;PF13175	ABC_tran;AAA_21;AAA_29;AAA_15	ABC transporter;AAA domain, putative AbiEii toxin, Type IV TA system;P-loop containing region of AAA domain;AAA ATPase domain
TRINITY_DN50045_c0_g1	Transporter, ABC superfamily (Breast cancer resistance protein) [Handroanthus impetiginosus])	0.51	0.33	0.2	0	0.2	4.23	0.346667	1.47667	GO:0055085;GO:0016021;GO:0009506;GO:0005886;GO:0042626;GO:0015419;GO:0016887;GO:0005524	BP:transmembrane transport;CC:integral component of membrane;CC:plasmodesma;CC:plasma membrane;MF:ATPase activity, coupled to transmembrane movement of substances;MF:ATPase-coupled sulfate transmembrane transporter activity;MF:ATPase activity;MF:ATP binding;	------	------	------	------	COG1131	S:Function unknown)	sp|Q9SJK6|WBC30_ARATH;	Putative white-brown complex homolog protein 30 OS=Arabidopsis thaliana OX=3702 GN=WBC30 PE=1 SV=3;	PF00005	ABC_tran	ABC transporter
TRINITY_DN44211_c0_g2	PREDICTED: ABC transporter C family member 8-like [Nelumbo nucifera])	0.5	0.49	0	1.16	0.6	0.5	0.33	0.753333	GO:0055085;GO:0016021;GO:0016020;GO:0000325;GO:0005774;GO:0042626;GO:0016887;GO:0005524	BP:transmembrane transport;CC:integral component of membrane;CC:membrane;CC:plant-type vacuole;CC:vacuolar membrane;MF:ATPase activity, coupled to transmembrane movement of substances;MF:ATPase activity;MF:ATP binding;	------	------	------	------	COG1132	V:Defense mechanisms)	sp|Q8LGU1|AB8C_ARATH;	ABC transporter C family member 8 OS=Arabidopsis thaliana OX=3702 GN=ABCC8 PE=2 SV=3;	------	------	------
TRINITY_DN50926_c0_g2	ABC transporter G family member 11 [Rosa chinensis])	0.99	0	0	1.75	0	0	0.33	0.583333	GO:0016021;GO:0016887;GO:0005524	CC:integral component of membrane;MF:ATPase activity;MF:ATP binding;	------	------	------	------	COG1131	V:Defense mechanisms)	sp|Q8RXN0|AB11G_ARATH;	ABC transporter G family member 11 OS=Arabidopsis thaliana OX=3702 GN=ABCG11 PE=1 SV=1;	PF01061	ABC2_membrane	ABC-2 type transporter
TRINITY_DN70464_c0_g3	elongation factor 3-like [Quercus suber])	0	0	0.95	0	8.32	0	0.316667	2.77333	GO:0016887;GO:0005524	MF:ATPase activity;MF:ATP binding;	K03235	EF3, TEF3	------	------	COG0488	S:Function unknown)	sp|P53978|EF3B_YEAST;	Elongation factor 3B OS=Saccharomyces cerevisiae;	PF17947;PF00005;PF13304;PF13476;PF13401	4HB;ABC_tran;AAA_21;AAA_23;AAA_22	Four helical bundle domain;ABC transporter;AAA domain, putative AbiEii toxin, Type IV TA system;AAA domain;AAA domain
TRINITY_DN27858_c0_g3	hypothetical protein FH972_023382 [Carpinus fangiana])	0.94	0	0	0	0	1.92	0.313333	0.64	GO:1902001;GO:0016021;GO:0005779;GO:0042626;GO:0016887;GO:0005524	BP:fatty acid transmembrane transport;CC:integral component of membrane;CC:integral component of peroxisomal membrane;MF:ATPase activity, coupled to transmembrane movement of substances;MF:ATPase activity;MF:ATP binding;	K15628	PXA	map04146;map02010	Peroxisome);ABC transporters)	------	------	sp|F1RBC8|ABCD1_DANRE;	ATP-binding cassette sub-family D member 1 OS=Danio rerio OX=7955 GN=abcd1 PE=2 SV=1;	PF06472	ABC_membrane_2	ABC transporter transmembrane region 2
TRINITY_DN56989_c0_g5	hypothetical protein M569_04071, partial [Genlisea aurea])	0.28	0	0.62	0.27	0.62	4.69	0.3	1.86	GO:0016021;GO:0016887;GO:0005524	CC:integral component of membrane;MF:ATPase activity;MF:ATP binding;	------	------	------	------	COG0842	V:Defense mechanisms)	sp|Q7FMW4|AB38G_ORYSJ;	ABC transporter G family member 38 OS=Oryza sativa subsp. japonica OX=39947 GN=ABCG38 PE=3 SV=1;	PF00005;PF03193	ABC_tran;RsgA_GTPase	ABC transporter;RsgA GTPase
TRINITY_DN85686_c0_g1		0	0	0.9	0	0	3.04	0.3	1.01333	------	------	------	------	------	------	------	------	------	------	PF00170;PF07716;PF16326	bZIP_1;bZIP_2;ABC_tran_CTD	bZIP transcription factor;Basic region leucine zipper;ABC transporter C-terminal domain
TRINITY_DN34191_c1_g1	PREDICTED: DNA-directed RNA polymerases I, II, and III subunit RPABC5 isoform X1 [Theobroma cacao])	0.87	0	0	0.51	10.74	0	0.29	3.75	GO:0006360;GO:0006366;GO:0042797;GO:0006351;GO:0005736;GO:0005666;GO:0005665;GO:0003677;GO:0008270;GO:0003899	BP:transcription from RNA polymerase I promoter;BP:transcription from RNA polymerase II promoter;BP:tRNA transcription from RNA polymerase III promoter;BP:transcription, DNA-templated;CC:DNA-directed RNA polymerase I complex;CC:DNA-directed RNA polymerase III complex;CC:DNA-directed RNA polymerase II, core complex;MF:DNA binding;MF:zinc ion binding;MF:DNA-directed RNA polymerase activity;	K03007	RPB10, POLR2L	map03020	RNA polymerase)	COG1644	K:Transcription)	sp|O13877|RPAB5_SCHPO;	DNA-directed RNA polymerases I, II, and III subunit RPABC5 OS=Schizosaccharomyces pombe;	PF01194	RNA_pol_N	RNA polymerases N / 8 kDa subunit
TRINITY_DN33550_c0_g1	predicted protein [Hordeum vulgare subsp. vulgare])	0	0.84	0	0	0	0	0.28	0	GO:0006351;GO:0005634;GO:0008270;GO:0000981;GO:0003677	BP:transcription, DNA-templated;CC:nucleus;MF:zinc ion binding;MF:RNA polymerase II transcription factor activity, sequence-specific DNA binding;MF:DNA binding;	------	------	------	------	ENOG411193M	S:Function unknown)	sp|Q2UEH7|ATRR_ASPOR;	ABC-transporter-regulating transcription factor OS=Aspergillus oryzae;	PF00172	Zn_clus	Fungal Zn(2)-Cys(6) binuclear cluster domain
TRINITY_DN34445_c0_g2	putative ABC transporter-like, P-loop containing nucleoside triphosphate hydrolase [Helianthus annuus])	0.3	0.14	0.35	0	4.86	0.44	0.263333	1.76667	GO:0055085;GO:0000325;GO:0016021;GO:0016020;GO:0005774;GO:0042626;GO:0016887;GO:0032440;GO:0005524	BP:transmembrane transport;CC:plant-type vacuole;CC:integral component of membrane;CC:membrane;CC:vacuolar membrane;MF:ATPase activity, coupled to transmembrane movement of substances;MF:ATPase activity;MF:2-alkenal reductase [NA;MF:ATP binding;	sbi;K05665	;ABCC1	map02010	ABC transporters)	COG1132	V:Defense mechanisms)	sp|Q8LGU1|AB8C_ARATH;	ABC transporter C family member 8 OS=Arabidopsis thaliana OX=3702 GN=ABCC8 PE=2 SV=3;	PF00005	ABC_tran	ABC transporter
TRINITY_DN14054_c0_g1	hypothetical protein M569_01408, partial [Genlisea aurea])	0.05	0.58	0.11	0.26	5.98	0	0.246667	2.08	GO:0016021;GO:0042626;GO:0016887;GO:0005524	CC:integral component of membrane;MF:ATPase activity, coupled to transmembrane movement of substances;MF:ATPase activity;MF:ATP binding;	K05658	ABCB1, CD243	map02010	ABC transporters)	COG1132	S:Function unknown)	sp|Q54BT3|ABCB2_DICDI;	ABC transporter B family member 2 OS=Dictyostelium discoideum OX=44689 GN=abcB2 PE=3 SV=1;	PF00664;PF00005;PF02463;PF13191;PF13555;PF09818;PF13175	ABC_membrane;ABC_tran;SMC_N;AAA_16;AAA_29;ABC_ATPase;AAA_15	ABC transporter transmembrane region;ABC transporter;RecF/RecN/SMC N terminal domain;AAA ATPase domain;P-loop containing region of AAA domain;Predicted ATPase of the ABC class;AAA ATPase domain
TRINITY_DN57829_c0_g4	multidrug resistance P-glycoprotein, partial [Striga asiatica])	0.24	0.46	0	1.4	0	0	0.233333	0.466667	GO:0055085;GO:0016021;GO:0042626;GO:0016887;GO:0005524	BP:transmembrane transport;CC:integral component of membrane;MF:ATPase activity, coupled to transmembrane movement of substances;MF:ATPase activity;MF:ATP binding;	K11085;K05658	msbA;ABCB1, CD243	map02010	ABC transporters)	COG1132	L:Replication, recombination and repair)	sp|Q54BT3|ABCB2_DICDI;	ABC transporter B family member 2 OS=Dictyostelium discoideum OX=44689 GN=abcB2 PE=3 SV=1;	PF00005;PF02463	ABC_tran;SMC_N	ABC transporter;RecF/RecN/SMC N terminal domain
TRINITY_DN69656_c0_g3	hypothetical protein OsI_03578 [Oryza sativa Indica Group])	0	0.2	0.5	0	0	2.92	0.233333	0.973333	GO:0055085;GO:0016021;GO:0005886;GO:0042626;GO:0016887;GO:0005524	BP:transmembrane transport;CC:integral component of membrane;CC:plasma membrane;MF:ATPase activity, coupled to transmembrane movement of substances;MF:ATPase activity;MF:ATP binding;	------	------	------	------	COG0842	L:Replication, recombination and repair)	sp|Q7FMW4|AB38G_ORYSJ;	ABC transporter G family member 38 OS=Oryza sativa subsp. japonica OX=39947 GN=ABCG38 PE=3 SV=1;	PF00005;PF19055	ABC_tran;ABC2_membrane_7	ABC transporter;ABC-2 type transporter
TRINITY_DN33382_c0_g1		0	0.68	0	0	0	0	0.226667	0	------	------	K05658	ABCB1, CD243	map02010	ABC transporters)	ENOG4111FVQ	S:Function unknown)	------	------	------	------	------
TRINITY_DN53749_c0_g1	ABC transporter B family member 15-like [Cucurbita moschata])	0	0	0.68	0	0	2.86	0.226667	0.953333	GO:0016021;GO:0042626;GO:0016887;GO:0005524	CC:integral component of membrane;MF:ATPase activity, coupled to transmembrane movement of substances;MF:ATPase activity;MF:ATP binding;	K11085;K05658	msbA;ABCB1, CD243	map02010	ABC transporters)	COG1132	C:Energy production and conversion)	sp|Q9Y8G1|ATRD_EMEND;	ABC multidrug transporter atrD OS=Emericella nidulans OX=162425 GN=atrD PE=1 SV=1;	PF00005;PF02463	ABC_tran;SMC_N	ABC transporter;RecF/RecN/SMC N terminal domain
TRINITY_DN96698_c0_g1	leptomycin B resistance protein pmd1-like [Quercus suber])	0	0	0.65	0	0	1.64	0.216667	0.546667	GO:0016021;GO:0042626;GO:0016887;GO:0005524	CC:integral component of membrane;MF:ATPase activity, coupled to transmembrane movement of substances;MF:ATPase activity;MF:ATP binding;	K05658	ABCB1, CD243	map02010	ABC transporters)	------	------	sp|Q4WTT9|MDR1_ASPFU;	ABC multidrug transporter mdr1 OS=Neosartorya fumigata;	PF00005;PF02463	ABC_tran;SMC_N	ABC transporter;RecF/RecN/SMC N terminal domain
TRINITY_DN32282_c0_g1	uncharacterized protein LOC103654304 isoform X1 [Zea mays])	0.46	0.05	0.12	0.36	1	0.56	0.21	0.64	GO:0006281;GO:0006418;GO:0016021;GO:0004812;GO:0004519;GO:0003677;GO:0003964;GO:0005524	BP:DNA repair;BP:tRNA aminoacylation for protein translation;CC:integral component of membrane;MF:aminoacyl-tRNA ligase activity;MF:endonuclease activity;MF:DNA binding;MF:RNA-directed DNA polymerase activity;MF:ATP binding;	K05641	ABCA1	map02010	ABC transporters)	ENOG410Y65V;ENOG4111K5V;ENOG410XS82;ENOG410YVY6;ENOG410YADE;ENOG4111MK6	S:Function unknown);	sp|P14381|YTX2_XENLA;	Transposon TX1 uncharacterized 149 kDa protein OS=Xenopus laevis OX=8355 PE=4 SV=1;	PF00078	RVT_1	Reverse transcriptase (RNA-dependent DNA polymerase)
TRINITY_DN37204_c0_g1	ABC transporter G family member 11 [Cucurbita pepo subsp. pepo])	0.63	0	0	2.22	0	0	0.21	0.74	GO:0055085;GO:0016021;GO:0005886;GO:0042626;GO:0016887;GO:0005524	BP:transmembrane transport;CC:integral component of membrane;CC:plasma membrane;MF:ATPase activity, coupled to transmembrane movement of substances;MF:ATPase activity;MF:ATP binding;	------	------	------	------	COG1131	V:Defense mechanisms)	sp|Q8RXN0|AB11G_ARATH;	ABC transporter G family member 11 OS=Arabidopsis thaliana OX=3702 GN=ABCG11 PE=1 SV=1;	PF01061	ABC2_membrane	ABC-2 type transporter
TRINITY_DN20946_c0_g1	hypothetical protein C4D60_Mb11t20770 [Musa balbisiana])	0.59	0	0	0.69	0	0	0.196667	0.23	GO:0055085;GO:0016021;GO:0016020;GO:0000325;GO:0005774;GO:0042626;GO:0016887;GO:0005524	BP:transmembrane transport;CC:integral component of membrane;CC:membrane;CC:plant-type vacuole;CC:vacuolar membrane;MF:ATPase activity, coupled to transmembrane movement of substances;MF:ATPase activity;MF:ATP binding;	K05665;K10742	ABCC1;DNA2	map02010;map03030	ABC transporters);DNA replication)	COG1132	S:Function unknown)	sp|Q7FB56|AB15C_ARATH;	Putative ABC transporter C family member 15 OS=Arabidopsis thaliana OX=3702 GN=ABCC15 PE=5 SV=2;	PF00005	ABC_tran	ABC transporter
TRINITY_DN27858_c0_g2	hypothetical protein FH972_023382 [Carpinus fangiana])	0.55	0	0	0	0	1.7	0.183333	0.566667	GO:0015916;GO:0010030;GO:0006744;GO:1902001;GO:0046861;GO:0016021;GO:0005779;GO:0042626;GO:0016887;GO:0005524	BP:fatty-acyl-CoA transport;BP:positive regulation of seed germination;BP:ubiquinone biosynthetic process;BP:fatty acid transmembrane transport;CC:glyoxysomal membrane;CC:integral component of membrane;CC:integral component of peroxisomal membrane;MF:ATPase activity, coupled to transmembrane movement of substances;MF:ATPase activity;MF:ATP binding;	K15628	PXA	map04146;map02010	Peroxisome);ABC transporters)	------	------	sp|P33897|ABCD1_HUMAN;	ATP-binding cassette sub-family D member 1 OS=Homo sapiens OX=9606 GN=ABCD1 PE=1 SV=2;	PF00005;PF13304;PF13476	ABC_tran;AAA_21;AAA_23	ABC transporter;AAA domain, putative AbiEii toxin, Type IV TA system;AAA domain
TRINITY_DN28165_c0_g2	LOW QUALITY PROTEIN: ABC transporter G family member 2-like [Abrus precatorius])	0.3	0	0.25	0.05	0.14	5.29	0.183333	1.82667	GO:0016021;GO:0016887;GO:0005524	CC:integral component of membrane;MF:ATPase activity;MF:ATP binding;	------	------	------	------	COG1131	V:Defense mechanisms)	sp|Q8RXN0|AB11G_ARATH;	ABC transporter G family member 11 OS=Arabidopsis thaliana OX=3702 GN=ABCG11 PE=1 SV=1;	PF01061;PF06422	ABC2_membrane;PDR_CDR	ABC-2 type transporter;CDR ABC transporter
TRINITY_DN45543_c0_g2	NU+ prion formation protein 1-like [Quercus suber])	0	0	0.53	0	0	1.77	0.176667	0.59	GO:0016887;GO:0005524	MF:ATPase activity;MF:ATP binding;	K03235	EF3, TEF3	------	------	------	------	sp|O14134|ELF1_SCHPO;	mRNA export factor elf1 OS=Schizosaccharomyces pombe;	PF00005;PF13304;PF01926;PF13555	ABC_tran;AAA_21;MMR_HSR1;AAA_29	ABC transporter;AAA domain, putative AbiEii toxin, Type IV TA system;50S ribosome-binding GTPase;P-loop containing region of AAA domain
TRINITY_DN53883_c0_g2	hypothetical protein AXX17_ATUG04710 [Arabidopsis thaliana])	0	0	0.52	0	0	3.31	0.173333	1.10333	GO:0009733;GO:0048443;GO:0010540;GO:0009637;GO:0043481;GO:0009958;GO:0008361;GO:0090691;GO:0010218;GO:0010541;GO:0048527;GO:0055085;GO:0009640;GO:0016021;GO:0005886;GO:0042626;GO:0010329;GO:0016887;GO:0005524	BP:response to auxin;BP:stamen development;BP:basipetal auxin transport;BP:response to blue light;BP:anthocyanin accumulation in tissues in response to UV light;BP:positive gravitropism;BP:regulation of cell size;BP:formation of plant organ boundary;BP:response to far red light;BP:acropetal auxin transport;BP:lateral root development;BP:transmembrane transport;BP:photomorphogenesis;CC:integral co…	------	------	------	------	ENOG410XPIZ	S:Function unknown)	sp|P33116|SPAT_BACIU;	Subtilin transport ATP-binding protein SpaT OS=Bacillus subtilis OX=1423 GN=spaT PE=3 SV=1;	PF00005;PF13304;PF13175	ABC_tran;AAA_21;AAA_15	ABC transporter;AAA domain, putative AbiEii toxin, Type IV TA system;AAA ATPase domain
TRINITY_DN30345_c0_g1	hypothetical protein FH972_025509 [Carpinus fangiana])	0.5	0	0	0	2.48	0	0.166667	0.826667	GO:0006879;GO:0055085;GO:0016021;GO:0005623;GO:0005743;GO:0042626;GO:0016887;GO:0005524	BP:cellular iron ion homeostasis;BP:transmembrane transport;CC:integral component of membrane;CC:cell;CC:mitochondrial inner membrane;MF:ATPase activity, coupled to transmembrane movement of substances;MF:ATPase activity;MF:ATP binding;	K05661	ABCB6	map02010	ABC transporters)	------	------	sp|Q08D64|ABCB6_XENTR;	ATP-binding cassette sub-family B member 6, mitochondrial OS=Xenopus tropicalis OX=8364 GN=abcb6 PE=2 SV=1;	PF00664	ABC_membrane	ABC transporter transmembrane region
TRINITY_DN44000_c0_g1	PREDICTED: ABC transporter C family member 12 [Eucalyptus grandis])	0.45	0	0	0	0	2.75	0.15	0.916667	GO:0016021;GO:0042626;GO:0016887;GO:0005524	CC:integral component of membrane;MF:ATPase activity, coupled to transmembrane movement of substances;MF:ATPase activity;MF:ATP binding;	K05665	ABCC1	map02010	ABC transporters)	------	------	sp|P39109|YCFI_YEAST;	Metal resistance protein YCF1 OS=Saccharomyces cerevisiae;	PF00005	ABC_tran	ABC transporter
TRINITY_DN90545_c0_g2	ABC transporter G family member 11-like [Phoenix dactylifera])	0	0.39	0	2.12	0.48	0	0.13	0.866667	GO:0016021;GO:0016887;GO:0005524	CC:integral component of membrane;MF:ATPase activity;MF:ATP binding;	------	------	------	------	COG1131	V:Defense mechanisms)	sp|Q8RWI9|AB15G_ARATH;	ABC transporter G family member 15 OS=Arabidopsis thaliana OX=3702 GN=ABCG15 PE=2 SV=2;	------	------	------
TRINITY_DN57829_c0_g6	ABC transporter B family member 11 [Arachis ipaensis])	0	0.38	0	2.28	0	0	0.126667	0.76	GO:0055085;GO:0016021;GO:0005887;GO:0005886;GO:0042626;GO:0016887;GO:0005524	BP:transmembrane transport;CC:integral component of membrane;CC:integral component of plasma membrane;CC:plasma membrane;MF:ATPase activity, coupled to transmembrane movement of substances;MF:ATPase activity;MF:ATP binding;	K05658	ABCB1, CD243	map02010	ABC transporters)	COG1132	V:Defense mechanisms)	sp|Q54BT3|ABCB2_DICDI;	ABC transporter B family member 2 OS=Dictyostelium discoideum OX=44689 GN=abcB2 PE=3 SV=1;	PF00664	ABC_membrane	ABC transporter transmembrane region
TRINITY_DN96579_c0_g1	phosphatidylserine decarboxylase proenzyme, mitochondrial-like [Quercus suber])	0	0	0.37	0	0	2.63	0.123333	0.876667	GO:0006646;GO:0008654;GO:0016540;GO:0005739;GO:0031305;GO:0004609	BP:phosphatidylethanolamine biosynthetic process;BP:phospholipid biosynthetic process;BP:protein autoprocessing;CC:mitochondrion;CC:integral component of mitochondrial inner membrane;MF:phosphatidylserine decarboxylase activity;	K01613	psd, PISD	map00564	Glycerophospholipid metabolism)	------	------	sp|Q5ABC5|PSD1_CANAL;	Phosphatidylserine decarboxylase proenzyme 1, mitochondrial OS=Candida albicans;	PF02666	PS_Dcarbxylase	Phosphatidylserine decarboxylase
TRINITY_DN31710_c0_g1	hypothetical protein E3N88_06654 [Mikania micrantha])	0.36	0	0	0	0	1.47	0.12	0.49	GO:0016021;GO:0042626;GO:0016887;GO:0005524	CC:integral component of membrane;MF:ATPase activity, coupled to transmembrane movement of substances;MF:ATPase activity;MF:ATP binding;	------	------	------	------	COG4178	S:Function unknown)	sp|Q94FB9|AB1D_ARATH;	ABC transporter D family member 1 OS=Arabidopsis thaliana OX=3702 GN=ABCD1 PE=1 SV=1;	PF00005;PF13555;PF13304;PF13476;PF13514	ABC_tran;AAA_29;AAA_21;AAA_23;AAA_27	ABC transporter;P-loop containing region of AAA domain;AAA domain, putative AbiEii toxin, Type IV TA system;AAA domain;AAA domain
TRINITY_DN50045_c0_g2	ABC transporter G family member 15-like [Arachis ipaensis])	0.14	0	0.17	0.33	0.5	1.43	0.103333	0.753333	GO:0055085;GO:0016021;GO:0005886;GO:0042626;GO:0016887;GO:0005524	BP:transmembrane transport;CC:integral component of membrane;CC:plasma membrane;MF:ATPase activity, coupled to transmembrane movement of substances;MF:ATPase activity;MF:ATP binding;	------	------	------	------	COG1131	S:Function unknown)	sp|Q9C8K2|AB12G_ARATH;	ABC transporter G family member 12 OS=Arabidopsis thaliana OX=3702 GN=ABCG12 PE=1 SV=1;	PF19055	ABC2_membrane_7	ABC-2 type transporter
TRINITY_DN90560_c0_g2	PREDICTED: ABC transporter G family member 14-like [Pyrus x bretschneideri])	0	0.24	0	6.7	0	0	0.08	2.23333	GO:0055085;GO:0016021;GO:0005886;GO:0042626;GO:0016887;GO:0005524	BP:transmembrane transport;CC:integral component of membrane;CC:plasma membrane;MF:ATPase activity, coupled to transmembrane movement of substances;MF:ATPase activity;MF:ATP binding;	------	------	------	------	COG1131	V:Defense mechanisms)	sp|P10090|WHITE_DROME;	Protein white OS=Drosophila melanogaster OX=7227 GN=w PE=2 SV=2;	PF19055	ABC2_membrane_7	ABC-2 type transporter
TRINITY_DN56989_c0_g2	PREDICTED: ABC transporter G family member 39-like isoform X2 [Cucumis melo])	0	0.15	0	0	0	1.28	0.05	0.426667	GO:0055085;GO:0016021;GO:0005886;GO:0042626;GO:0016887;GO:0005524	BP:transmembrane transport;CC:integral component of membrane;CC:plasma membrane;MF:ATPase activity, coupled to transmembrane movement of substances;MF:ATPase activity;MF:ATP binding;	------	------	------	------	COG1131;COG0842	V:Defense mechanisms);	sp|Q2QV81|AB49G_ORYSJ;	ABC transporter G family member 49 OS=Oryza sativa subsp. japonica OX=39947 GN=ABCG49 PE=2 SV=3;	PF01061	ABC2_membrane	ABC-2 type transporter
TRINITY_DN100458_c0_g1		0	0	0	0	4.49	0	0	1.49667	------	------	------	------	------	------	COG0842;COG1131	V:Defense mechanisms);	------	------	PF01061	ABC2_membrane	ABC-2 type transporter
TRINITY_DN10430_c0_g1	LOW QUALITY PROTEIN: leptomycin B resistance protein pmd1-like [Quercus suber])	0	0	0	0	0	0	0	0	GO:0016021;GO:0042626;GO:0016887;GO:0005524	CC:integral component of membrane;MF:ATPase activity, coupled to transmembrane movement of substances;MF:ATPase activity;MF:ATP binding;	K05660;K06147;K05658	ABCB5;ABCB-BAC;ABCB1, CD243	map02010	ABC transporters)	COG1132	S:Function unknown)	sp|B2KWH4|ABC1_AJECA;	ABC transporter 1 OS=Ajellomyces capsulatus OX=5037 GN=ABC1 PE=2 SV=1;	------	------	------
TRINITY_DN10430_c0_g3	ABC transporter B family member 21-like [Solanum pennellii])	0	0	0	0	2.78	0	0	0.926667	GO:0055085;GO:0016021;GO:0042626;GO:0016887;GO:0005524	BP:transmembrane transport;CC:integral component of membrane;MF:ATPase activity, coupled to transmembrane movement of substances;MF:ATPase activity;MF:ATP binding;	K05659;K05658	ABCB4;ABCB1, CD243	map02010	ABC transporters)	COG1132	V:Defense mechanisms)	sp|O70127|ABCBB_RAT;	Bile salt export pump OS=Rattus norvegicus OX=10116 GN=Abcb11 PE=1 SV=1;	PF00664	ABC_membrane	ABC transporter transmembrane region
TRINITY_DN10430_c0_g4	LOW QUALITY PROTEIN: ABC transporter B family member 11-like [Lactuca sativa])	0	0	0	0	7.61	0	0	2.53667	GO:0016021;GO:0042626;GO:0016887;GO:0005524	CC:integral component of membrane;MF:ATPase activity, coupled to transmembrane movement of substances;MF:ATPase activity;MF:ATP binding;	K05659;K05658	ABCB4;ABCB1, CD243	map02010	ABC transporters)	COG1132	S:Function unknown)	sp|P06795|MDR1B_MOUSE;	ATP-dependent translocase ABCB1 OS=Mus musculus OX=10090 GN=Abcb1b PE=1 SV=1;	PF00664	ABC_membrane	ABC transporter transmembrane region
TRINITY_DN13898_c0_g3	ABC transporter C family member 8 [Cucumis melo var. makuwa])	0	0	0	5.42	0	0	0	1.80667	GO:0016021;GO:0042626;GO:0016887;GO:0005524	CC:integral component of membrane;MF:ATPase activity, coupled to transmembrane movement of substances;MF:ATPase activity;MF:ATP binding;	K05666	ABCC2	map02010	ABC transporters)	COG1132	V:Defense mechanisms)	sp|Q9M1C7|AB9C_ARATH;	ABC transporter C family member 9 OS=Arabidopsis thaliana OX=3702 GN=ABCC9 PE=2 SV=2;	PF00005	ABC_tran	ABC transporter
TRINITY_DN14054_c0_g2		0	0	0	0	8.64	0	0	2.88	------	------	------	------	------	------	------	------	------	------	PF00664	ABC_membrane	ABC transporter transmembrane region
TRINITY_DN16957_c1_g1	ABC transporter-like [Macleaya cordata])	0	0	0	3.96	0	0	0	1.32	GO:0055085;GO:0016021;GO:0005886;GO:0042626;GO:0016887;GO:0005524	BP:transmembrane transport;CC:integral component of membrane;CC:plasma membrane;MF:ATPase activity, coupled to transmembrane movement of substances;MF:ATPase activity;MF:ATP binding;	------	------	------	------	COG0842;COG1131;COG0465	S:Function unknown);O:Posttranslational modification, protein turnover, chaperones)	sp|Q7PC86|AB35G_ARATH;	ABC transporter G family member 35 OS=Arabidopsis thaliana OX=3702 GN=ABCG35 PE=2 SV=1;	------	------	------
TRINITY_DN17475_c0_g2	uncharacterized ABC transporter ATP-binding protein C29A3.09c-like [Quercus suber])	0	0	0	0	11.94	0	0	3.98	GO:0046686;GO:0042742;GO:0005829;GO:0016887;GO:0005524	BP:response to cadmium ion;BP:defense response to bacterium;CC:cytosol;MF:ATPase activity;MF:ATP binding;	K06158	ABCF3	------	------	COG0488	S:Function unknown)	sp|O59672|YB89_SCHPO;	Uncharacterized ABC transporter ATP-binding protein C29A3.09c OS=Schizosaccharomyces pombe;	PF00005	ABC_tran	ABC transporter
TRINITY_DN18462_c2_g1	hypothetical protein AMTR_s00507p00011670 [Amborella trichopoda])	0	0	0	5.2	0	0	0	1.73333	GO:0016021;GO:0042626;GO:0016887;GO:0005524	CC:integral component of membrane;MF:ATPase activity, coupled to transmembrane movement of substances;MF:ATPase activity;MF:ATP binding;	K05665	ABCC1	map02010	ABC transporters)	COG1132	V:Defense mechanisms)	sp|Q8LGU1|AB8C_ARATH;	ABC transporter C family member 8 OS=Arabidopsis thaliana OX=3702 GN=ABCC8 PE=2 SV=3;	------	------	------
TRINITY_DN18518_c0_g3	ABC transporter B family member 4 [Capsicum chinense])	0	0	0	0	0	0	0	0	GO:0015074;GO:0016021;GO:0042626;GO:0016887;GO:0008270;GO:0003676;GO:0005524	BP:DNA integration;CC:integral component of membrane;MF:ATPase activity, coupled to transmembrane movement of substances;MF:ATPase activity;MF:zinc ion binding;MF:nucleic acid binding;MF:ATP binding;	------	------	------	------	------	------	------	------	------	------	------
TRINITY_DN19796_c0_g1	hypothetical protein SORBI_3002G123200 [Sorghum bicolor])	0	0	0	0	9.9	0	0	3.3	GO:0006351;GO:0005736;GO:0005666;GO:0005665;GO:0003677;GO:0003899;GO:0008270	BP:transcription, DNA-templated;CC:DNA-directed RNA polymerase I complex;CC:DNA-directed RNA polymerase III complex;CC:DNA-directed RNA polymerase II, core complex;MF:DNA binding;MF:DNA-directed RNA polymerase activity;MF:zinc ion binding;	K03009	RPB12, POLR2K	map03020	RNA polymerase)	COG1996	K:Transcription)	sp|P48011|RPAB4_SCHPO;	DNA-directed RNA polymerases I, II, and III subunit RPABC4 OS=Schizosaccharomyces pombe;	PF03604;PF17207	DNA_RNApol_7kD;MCM_OB	DNA directed RNA polymerase, 7 kDa subunit;MCM OB domain
TRINITY_DN20883_c0_g1	putative Multidrug resistance-associated protein 14 [Oryza sativa Indica Group])	0	0	0	0	3.25	0	0	1.08333	GO:0016021;GO:0042626;GO:0016887;GO:0005524	CC:integral component of membrane;MF:ATPase activity, coupled to transmembrane movement of substances;MF:ATPase activity;MF:ATP binding;	------	------	------	------	COG1132	V:Defense mechanisms)	sp|Q9LZJ5|AB14C_ARATH;	ABC transporter C family member 14 OS=Arabidopsis thaliana OX=3702 GN=ABCC14 PE=1 SV=1;	PF00005	ABC_tran	ABC transporter
TRINITY_DN23254_c0_g1	hypothetical protein Lal_00012825 [Lupinus albus])	0	0	0	0	3.02	0	0	1.00667	GO:0016021;GO:0042626;GO:0016887;GO:0005524	CC:integral component of membrane;MF:ATPase activity, coupled to transmembrane movement of substances;MF:ATPase activity;MF:ATP binding;	------	------	------	------	------	------	sp|Q6FWS5|YBT1_CANGA;	Pleiotropic ABC efflux transporter of multiple drugs YBT1 OS=Candida glabrata;	PF00005;PF02463;PF13191	ABC_tran;SMC_N;AAA_16	ABC transporter;RecF/RecN/SMC N terminal domain;AAA ATPase domain
TRINITY_DN27768_c0_g1	ABC transporter aclQ-like [Quercus suber])	0	0	0	0	5.11	0	0	1.70333	GO:0007264;GO:0016021;GO:0042626;GO:0003924;GO:0016887;GO:0005524;GO:0005525	BP:small GTPase mediated signal transduction;CC:integral component of membrane;MF:ATPase activity, coupled to transmembrane movement of substances;MF:GTPase activity;MF:ATPase activity;MF:ATP binding;MF:GTP binding;	K23329;K05661	HMT1, ACLQ;ABCB6	map02010	ABC transporters)	------	------	sp|Q02592|HMT1_SCHPO;	Heavy metal tolerance protein OS=Schizosaccharomyces pombe;	PF00005;PF02463	ABC_tran;SMC_N	ABC transporter;RecF/RecN/SMC N terminal domain
TRINITY_DN27768_c0_g4	LOW QUALITY PROTEIN: putative multidrug resistance protein [Camellia sinensis])	0	0	0	0	3.45	0	0	1.15	GO:0055085;GO:0016021;GO:0042626;GO:0016887;GO:0005524	BP:transmembrane transport;CC:integral component of membrane;MF:ATPase activity, coupled to transmembrane movement of substances;MF:ATPase activity;MF:ATP binding;	K05661;K05663;K06147;K18890	ABCB6;ATM;ABCB-BAC;mdlB, smdB	map02010	ABC transporters)	COG5265	J:Translation, ribosomal structure and biogenesis)	sp|Q08D64|ABCB6_XENTR;	ATP-binding cassette sub-family B member 6, mitochondrial OS=Xenopus tropicalis OX=8364 GN=abcb6 PE=2 SV=1;	------	------	------
TRINITY_DN28923_c1_g1		0	0	0	0	0	0	0	0	------	------	------	------	------	------	------	------	------	------	PF01061	ABC2_membrane	ABC-2 type transporter
TRINITY_DN30345_c0_g2	ABC transporter aclQ-like [Quercus suber])	0	0	0	0	0	0	0	0	GO:0006879;GO:0055085;GO:0016021;GO:0005623;GO:0005743;GO:0042626;GO:0016887;GO:0005524	BP:cellular iron ion homeostasis;BP:transmembrane transport;CC:integral component of membrane;CC:cell;CC:mitochondrial inner membrane;MF:ATPase activity, coupled to transmembrane movement of substances;MF:ATPase activity;MF:ATP binding;	K05661	ABCB6	map02010	ABC transporters)	ENOG410YYGS;COG5265	S:Function unknown);	sp|O70595|ABCB6_RAT;	ATP-binding cassette sub-family B member 6, mitochondrial OS=Rattus norvegicus OX=10116 GN=Abcb6 PE=2 SV=1;	------	------	------
TRINITY_DN30610_c0_g1	PREDICTED: ABC transporter C family member 8-like [Vigna angularis])	0	0	0	0	6.58	0	0	2.19333	GO:0055085;GO:0016021;GO:0016020;GO:0000325;GO:0005774;GO:0042626;GO:0016887;GO:0005524	BP:transmembrane transport;CC:integral component of membrane;CC:membrane;CC:plant-type vacuole;CC:vacuolar membrane;MF:ATPase activity, coupled to transmembrane movement of substances;MF:ATPase activity;MF:ATP binding;	------	------	------	------	COG1132	V:Defense mechanisms)	sp|Q8LGU1|AB8C_ARATH;	ABC transporter C family member 8 OS=Arabidopsis thaliana OX=3702 GN=ABCC8 PE=2 SV=3;	------	------	------
TRINITY_DN30645_c0_g1	hypothetical protein FH972_021517 [Carpinus fangiana])	0	0	0	0	5.12	0	0	1.70667	GO:0055085;GO:0016021;GO:0016020;GO:0000325;GO:0005774;GO:0042626;GO:0016887;GO:0005524	BP:transmembrane transport;CC:integral component of membrane;CC:membrane;CC:plant-type vacuole;CC:vacuolar membrane;MF:ATPase activity, coupled to transmembrane movement of substances;MF:ATPase activity;MF:ATP binding;	------	------	------	------	COG1132	K:Transcription)	sp|Q8VI47|MRP2_MOUSE;	Canalicular multispecific organic anion transporter 1 OS=Mus musculus OX=10090 GN=Abcc2 PE=1 SV=2;	PF00005	ABC_tran	ABC transporter
TRINITY_DN3250_c0_g2	hypothetical protein AQUCO_03600114v1 [Aquilegia coerulea])	0	0	0	0	23.83	0	0	7.94333	GO:0055085;GO:0016021;GO:0016020;GO:0005886;GO:0042626;GO:0016887;GO:0005524	BP:transmembrane transport;CC:integral component of membrane;CC:membrane;CC:plasma membrane;MF:ATPase activity, coupled to transmembrane movement of substances;MF:ATPase activity;MF:ATP binding;	------	------	------	------	COG1131	V:Defense mechanisms)	sp|Q9C6W5|AB14G_ARATH;	ABC transporter G family member 14 OS=Arabidopsis thaliana OX=3702 GN=ABCG14 PE=2 SV=1;	PF01061;PF00005;PF19055;PF03215;PF13191	ABC2_membrane;ABC_tran;ABC2_membrane_7;Rad17;AAA_16	ABC-2 type transporter;ABC transporter;ABC-2 type transporter;Rad17 P-loop domain;AAA ATPase domain
TRINITY_DN3250_c0_g3	ABC transporter G family member 26 [Spinacia oleracea])	0	0	0	0	6.94	0	0	2.31333	GO:0055085;GO:0016021;GO:0005886;GO:0042626;GO:0016887;GO:0005524	BP:transmembrane transport;CC:integral component of membrane;CC:plasma membrane;MF:ATPase activity, coupled to transmembrane movement of substances;MF:ATPase activity;MF:ATP binding;	------	------	------	------	------	------	sp|Q9LK50|AB26G_ARATH;	ABC transporter G family member 26 OS=Arabidopsis thaliana OX=3702 GN=ABCG26 PE=3 SV=2;	PF01061	ABC2_membrane	ABC-2 type transporter
TRINITY_DN32932_c0_g2	hypothetical protein E2562_035524 [Oryza meyeriana var. granulata])	0	0	0	0	3.57	0	0	1.19	GO:0006415;GO:0000054;GO:0006413;GO:0016021;GO:0016887;GO:0005506;GO:0043024;GO:0005524	BP:translational termination;BP:ribosomal subunit export from nucleus;BP:translational initiation;CC:integral component of membrane;MF:ATPase activity;MF:iron ion binding;MF:ribosomal small subunit binding;MF:ATP binding;	K06174	ABCE1, Rli1	------	------	COG1245	S:Function unknown)	sp|P61221|ABCE1_HUMAN;	ATP-binding cassette sub-family E member 1 OS=Homo sapiens OX=9606 GN=ABCE1 PE=1 SV=1;	------	------	------
TRINITY_DN33372_c0_g1	hypothetical protein FH972_025233 [Carpinus fangiana])	0	0	0	0	9.17	0	0	3.05667	GO:1902001;GO:0016021;GO:0005779;GO:0042626;GO:0016887;GO:0005524	BP:fatty acid transmembrane transport;CC:integral component of membrane;CC:integral component of peroxisomal membrane;MF:ATPase activity, coupled to transmembrane movement of substances;MF:ATPase activity;MF:ATP binding;	K15628	PXA	map04146;map02010	Peroxisome);ABC transporters)	COG4178	S:Function unknown)	sp|P41909|PXA1_YEAST;	Peroxisomal long-chain fatty acid import protein 2 OS=Saccharomyces cerevisiae;	PF06472	ABC_membrane_2	ABC transporter transmembrane region 2
TRINITY_DN33372_c0_g2	hypothetical protein FH972_025233 [Carpinus fangiana])	0	0	0	0	3.59	0	0	1.19667	GO:1902001;GO:0016021;GO:0005779;GO:0042626;GO:0016887;GO:0005524	BP:fatty acid transmembrane transport;CC:integral component of membrane;CC:integral component of peroxisomal membrane;MF:ATPase activity, coupled to transmembrane movement of substances;MF:ATPase activity;MF:ATP binding;	K15628	PXA	map04146;map02010	Peroxisome);ABC transporters)	COG4178	S:Function unknown)	sp|F1RBC8|ABCD1_DANRE;	ATP-binding cassette sub-family D member 1 OS=Danio rerio OX=7955 GN=abcd1 PE=2 SV=1;	PF00005;PF06472	ABC_tran;ABC_membrane_2	ABC transporter;ABC transporter transmembrane region 2
TRINITY_DN34928_c0_g1	unnamed protein product, partial [Nymphaea colorata])	0	0	0	0	4.35	0	0	1.45	GO:0015910;GO:0005777;GO:0042626;GO:0042803	BP:peroxisomal long-chain fatty acid import;CC:peroxisome;MF:ATPase activity, coupled to transmembrane movement of substances;MF:protein homodimerization activity;	K05677	ABCD3, PMP70	map04146;map02010	Peroxisome);ABC transporters)	COG4178	S:Function unknown)	sp|P28288|ABCD3_HUMAN;	ATP-binding cassette sub-family D member 3 OS=Homo sapiens OX=9606 GN=ABCD3 PE=1 SV=1;	PF06472	ABC_membrane_2	ABC transporter transmembrane region 2
TRINITY_DN35503_c0_g3		0	0	0	0	0	7.59	0	2.53	------	------	K02040	pstS	map02010	ABC transporters)	------	------	------	------	PF12849	PBP_like_2	PBP superfamily domain
TRINITY_DN37239_c0_g1	unnamed protein product [Brassica rapa])	0	0	0	0	16.02	0	0	5.34	GO:0055085;GO:0016021;GO:0005886;GO:0042626;GO:0016887;GO:0005524	BP:transmembrane transport;CC:integral component of membrane;CC:plasma membrane;MF:ATPase activity, coupled to transmembrane movement of substances;MF:ATPase activity;MF:ATP binding;	------	------	------	------	COG0842	S:Function unknown)	sp|Q7PC86|AB35G_ARATH;	ABC transporter G family member 35 OS=Arabidopsis thaliana OX=3702 GN=ABCG35 PE=2 SV=1;	------	------	------
TRINITY_DN38155_c0_g1		0	0	0	0	0	0	0	0	------	------	K15628	PXA	map04146;map02010	Peroxisome);ABC transporters)	------	------	------	------	------	------	------
TRINITY_DN39206_c0_g2	DNA-directed RNA polymerases I, II, and III subunit RPABC2-like [Quercus suber])	0	0	0	7.74	0	0	0	2.58	GO:0006351;GO:0005736;GO:0005665;GO:0005666;GO:0003677;GO:0003899	BP:transcription, DNA-templated;CC:DNA-directed RNA polymerase I complex;CC:DNA-directed RNA polymerase II, core complex;CC:DNA-directed RNA polymerase III complex;MF:DNA binding;MF:DNA-directed RNA polymerase activity;	K03014	RPB6, POLR2F	map03020	RNA polymerase)	------	------	sp|P20435|RPAB2_YEAST;	DNA-directed RNA polymerases I, II, and III subunit RPABC2 OS=Saccharomyces cerevisiae;	PF01192	RNA_pol_Rpb6	RNA polymerase Rpb6
TRINITY_DN39526_c0_g3	elongation factor 3-like [Quercus suber])	0	0	0	0	3	0	0	1	GO:0016887;GO:0005524	MF:ATPase activity;MF:ATP binding;	K03235	EF3, TEF3	------	------	COG0488	S:Function unknown)	sp|O93796|EF3_CANGA;	Elongation factor 3 OS=Candida glabrata;	PF00005	ABC_tran	ABC transporter
TRINITY_DN41461_c0_g2	probable histidine kinase 2 [Asparagus officinalis])	0	0	0	0	3.62	0	0	1.20667	GO:0009736;GO:0046777;GO:0016021;GO:0005886;GO:0005887;GO:0000155;GO:0009927;GO:0004673	BP:cytokinin-activated signaling pathway;BP:protein autophosphorylation;CC:integral component of membrane;CC:plasma membrane;CC:integral component of plasma membrane;MF:phosphorelay sensor kinase activity;MF:histidine phosphotransfer kinase activity;MF:protein histidine kinase activity;	K02030	ABC.PA.S	------	------	ENOG410XNMH	S:Function unknown)	sp|A2YA15|OHK2_ORYSI;	Probable histidine kinase 2 OS=Oryza sativa subsp. indica OX=39946 GN=HK2 PE=3 SV=1;	PF00072	Response_reg	Response regulator receiver domain
TRINITY_DN42133_c0_g1	ABC transporter B family member 19-like [Sesamum indicum])	0	0	0	0	0	5.4	0	1.8	GO:0016021;GO:0042626;GO:0016887;GO:0005524	CC:integral component of membrane;MF:ATPase activity, coupled to transmembrane movement of substances;MF:ATPase activity;MF:ATP binding;	K05658	ABCB1, CD243	map02010	ABC transporters)	------	------	sp|O70127|ABCBB_RAT;	Bile salt export pump OS=Rattus norvegicus OX=10116 GN=Abcb11 PE=1 SV=1;	------	------	------
TRINITY_DN43179_c0_g1	phosphatidylserine decarboxylase proenzyme, mitochondrial-like [Quercus suber])	0	0	0	0	4.98	0	0	1.66	GO:0006646;GO:0016540;GO:0005739;GO:0031305;GO:0004609	BP:phosphatidylethanolamine biosynthetic process;BP:protein autoprocessing;CC:mitochondrion;CC:integral component of mitochondrial inner membrane;MF:phosphatidylserine decarboxylase activity;	K01613	psd, PISD	map00564	Glycerophospholipid metabolism)	COG0688	I:Lipid transport and metabolism)	sp|Q5ABC5|PSD1_CANAL;	Phosphatidylserine decarboxylase proenzyme 1, mitochondrial OS=Candida albicans;	------	------	------
TRINITY_DN43641_c0_g1	hypothetical protein Lal_00010608 [Lupinus albus])	0	0	0	0	3.07	0	0	1.02333	GO:0055085;GO:0016021;GO:0042626;GO:0016887;GO:0005524	BP:transmembrane transport;CC:integral component of membrane;MF:ATPase activity, coupled to transmembrane movement of substances;MF:ATPase activity;MF:ATP binding;	K05661	ABCB6	map02010	ABC transporters)	COG5265	P:Inorganic ion transport and metabolism)	sp|Q08D64|ABCB6_XENTR;	ATP-binding cassette sub-family B member 6, mitochondrial OS=Xenopus tropicalis OX=8364 GN=abcb6 PE=2 SV=1;	PF00005	ABC_tran	ABC transporter
TRINITY_DN44000_c0_g2	PREDICTED: ABC transporter C family member 12 [Eucalyptus grandis])	0	0	0	0	0	5.65	0	1.88333	GO:0016021;GO:0042626;GO:0016887;GO:0005524	CC:integral component of membrane;MF:ATPase activity, coupled to transmembrane movement of substances;MF:ATPase activity;MF:ATP binding;	K05665	ABCC1	map02010	ABC transporters)	------	------	sp|P39109|YCFI_YEAST;	Metal resistance protein YCF1 OS=Saccharomyces cerevisiae;	PF00005	ABC_tran	ABC transporter
TRINITY_DN44416_c0_g2	DNA-directed RNA polymerases II, IV and V subunit 6A-like [Asparagus officinalis])	0	0	0	0	2.55	0	0	0.85	GO:0006351;GO:0005736;GO:0005665;GO:0005666;GO:0003677;GO:0003899	BP:transcription, DNA-templated;CC:DNA-directed RNA polymerase I complex;CC:DNA-directed RNA polymerase II, core complex;CC:DNA-directed RNA polymerase III complex;MF:DNA binding;MF:DNA-directed RNA polymerase activity;	K03014	RPB6, POLR2F	map03020	RNA polymerase)	COG1758	K:Transcription)	sp|P36595|RPAB2_SCHPO;	DNA-directed RNA polymerases I, II, and III subunit RPABC2 OS=Schizosaccharomyces pombe;	PF01192	RNA_pol_Rpb6	RNA polymerase Rpb6
TRINITY_DN45215_c0_g1	hypothetical protein FH972_023597 [Carpinus fangiana])	0	0	0	0	0	0	0	0	GO:0055085;GO:0016021;GO:0042626;GO:0016887;GO:0005524	BP:transmembrane transport;CC:integral component of membrane;MF:ATPase activity, coupled to transmembrane movement of substances;MF:ATPase activity;MF:ATP binding;	K05658	ABCB1, CD243	map02010	ABC transporters)	------	------	sp|Q9Y8G1|ATRD_EMEND;	ABC multidrug transporter atrD OS=Emericella nidulans OX=162425 GN=atrD PE=1 SV=1;	PF00664	ABC_membrane	ABC transporter transmembrane region
TRINITY_DN45215_c0_g2	leptomycin B resistance protein pmd1-like [Quercus suber])	0	0	0	7.18	0	0	0	2.39333	GO:0016021;GO:0042626;GO:0016887;GO:0005524	CC:integral component of membrane;MF:ATPase activity, coupled to transmembrane movement of substances;MF:ATPase activity;MF:ATP binding;	K05658	ABCB1, CD243	map02010	ABC transporters)	------	------	sp|Q9Y8G1|ATRD_EMEND;	ABC multidrug transporter atrD OS=Emericella nidulans OX=162425 GN=atrD PE=1 SV=1;	PF00664	ABC_membrane	ABC transporter transmembrane region
TRINITY_DN48855_c0_g1	activator of stress genes 1-like [Quercus suber])	0	0	0	0	13.17	0	0	4.39	------	------	------	------	------	------	ENOG410XTI3	K:Transcription)	sp|Q5B4H2|ATRR_EMENI;	ABC-transporter-regulating transcription factor OS=Emericella nidulans;	PF00172	Zn_clus	Fungal Zn(2)-Cys(6) binuclear cluster domain
TRINITY_DN50685_c0_g1	hypothetical protein FH972_023675 [Carpinus fangiana])	0	0	0	0	0	6.83	0	2.27667	GO:0030001;GO:0016021;GO:0046872;GO:0016887;GO:0005524	BP:metal ion transport;CC:integral component of membrane;MF:metal ion binding;MF:ATPase activity;MF:ATP binding;	K06185	ABCF2	------	------	COG0488	T:Signal transduction mechanisms)	sp|Q8T6B7|ABCF2_DICDI;	ABC transporter F family member 2 OS=Dictyostelium discoideum OX=44689 GN=abcF2 PE=3 SV=1;	PF12848	ABC_tran_Xtn	ABC transporter
TRINITY_DN50685_c0_g2	ABC transporter ATP-binding protein ARB1-like [Quercus suber])	0	0	0	0	0	0	0	0	GO:0030001;GO:0016021;GO:0046872;GO:0016887;GO:0005524	BP:metal ion transport;CC:integral component of membrane;MF:metal ion binding;MF:ATPase activity;MF:ATP binding;	K06185	ABCF2	------	------	COG0488	T:Signal transduction mechanisms)	sp|Q8T6B7|ABCF2_DICDI;	ABC transporter F family member 2 OS=Dictyostelium discoideum OX=44689 GN=abcF2 PE=3 SV=1;	PF00005	ABC_tran	ABC transporter
TRINITY_DN51209_c0_g2	hypothetical protein Lal_00000004 [Lupinus albus])	0	0	0	0	1.29	0	0	0.43	GO:0035435;GO:0016020;GO:0015562;GO:0005315;GO:0016887;GO:0015415;GO:0005524	BP:phosphate ion transmembrane transport;CC:membrane;MF:efflux transmembrane transporter activity;MF:inorganic phosphate transmembrane transporter activity;MF:ATPase activity;MF:ATPase-coupled phosphate ion transmembrane transporter activity;MF:ATP binding;	------	------	------	------	COG1117	S:Function unknown)	sp|Q65HC0|PSTB1_BACLD;	Phosphate import ATP-binding protein PstB 1 OS=Bacillus licheniformis;	PF00005;PF13304	ABC_tran;AAA_21	ABC transporter;AAA domain, putative AbiEii toxin, Type IV TA system
TRINITY_DN51565_c0_g1	leptomycin B resistance protein pmd1-like [Quercus suber])	0	0	0	0	0	3.24	0	1.08	GO:0016021;GO:0042626;GO:0016887;GO:0005524	CC:integral component of membrane;MF:ATPase activity, coupled to transmembrane movement of substances;MF:ATPase activity;MF:ATP binding;	K05658	ABCB1, CD243	map02010	ABC transporters)	COG1132	L:Replication, recombination and repair)	sp|K3VYH8|W4934_FUSPC;	ABC transporter FPSE_09185 OS=Fusarium pseudograminearum;	PF00664	ABC_membrane	ABC transporter transmembrane region
TRINITY_DN52026_c0_g1	putative ABC transporter C family member 15 [Jatropha curcas])	0	0	0	0	0	1.55	0	0.516667	GO:0016021;GO:0042626;GO:0016887;GO:0005524;GO:0016620	CC:integral component of membrane;MF:ATPase activity, coupled to transmembrane movement of substances;MF:ATPase activity;MF:ATP binding;MF:oxidoreductase activity, acting on the aldehyde or oxo group of donors, NAD or NADP as acceptor;	------	------	------	------	COG1132	S:Function unknown)	sp|Q96J66|ABCCB_HUMAN;	ATP-binding cassette sub-family C member 11 OS=Homo sapiens OX=9606 GN=ABCC11 PE=1 SV=1;	PF00005	ABC_tran	ABC transporter
TRINITY_DN52345_c0_g3	ABC transporter ATP-binding protein ARB1-like [Quercus suber])	0	0	0	0	3.24	0	0	1.08	GO:0016887;GO:0005524	MF:ATPase activity;MF:ATP binding;	K06185	ABCF2	------	------	COG0488	S:Function unknown)	sp|P40024|ARB1_YEAST;	ABC transporter ATP-binding protein ARB1 OS=Saccharomyces cerevisiae;	PF12848;PF00005;PF13555;PF13476;PF13304;PF03193	ABC_tran_Xtn;ABC_tran;AAA_29;AAA_23;AAA_21;RsgA_GTPase	ABC transporter;ABC transporter;P-loop containing region of AAA domain;AAA domain;AAA domain, putative AbiEii toxin, Type IV TA system;RsgA GTPase
TRINITY_DN52345_c0_g5	ABC transporter ATP-binding protein ARB1-like [Quercus suber])	0	0	0	0	3.17	0	0	1.05667	GO:0016887;GO:0005524	MF:ATPase activity;MF:ATP binding;	K06185	ABCF2	------	------	COG0488	S:Function unknown)	sp|P40024|ARB1_YEAST;	ABC transporter ATP-binding protein ARB1 OS=Saccharomyces cerevisiae;	------	------	------
TRINITY_DN53277_c0_g1	hypothetical protein Lal_00012825 [Lupinus albus])	0	0	0	0	2.96	0	0	0.986667	GO:0016021;GO:0042626;GO:0016887;GO:0005524	CC:integral component of membrane;MF:ATPase activity, coupled to transmembrane movement of substances;MF:ATPase activity;MF:ATP binding;	------	------	------	------	COG1132	O:Posttranslational modification, protein turnover, chaperones)	sp|G4N2B5|ABC7_MAGO7;	ABC transporter 7 OS=Magnaporthe oryzae;	------	------	------
TRINITY_DN54765_c0_g1		0	0	0	0	15.36	0	0	5.12	------	------	------	------	------	------	------	------	sp|Q6FWS5|YBT1_CANGA;	Pleiotropic ABC efflux transporter of multiple drugs YBT1 OS=Candida glabrata;	------	------	------
TRINITY_DN56989_c0_g3	hypothetical protein TanjilG_01244 [Lupinus angustifolius])	0	0	0	0	0	4.17	0	1.39	GO:0055085;GO:0016021;GO:0005886;GO:0042626;GO:0016887;GO:0005524	BP:transmembrane transport;CC:integral component of membrane;CC:plasma membrane;MF:ATPase activity, coupled to transmembrane movement of substances;MF:ATPase activity;MF:ATP binding;	------	------	------	------	COG1131;COG0842	V:Defense mechanisms);	sp|B9G300|AB52G_ORYSJ;	ABC transporter G family member 52 OS=Oryza sativa subsp. japonica OX=39947 GN=ABCG52 PE=2 SV=2;	PF19055	ABC2_membrane_7	ABC-2 type transporter
TRINITY_DN57829_c0_g2	unnamed protein product [Triticum turgidum subsp. durum])	0	0	0	11.19	0	0	0	3.73	GO:0016021;GO:0042626;GO:0016887;GO:0005524	CC:integral component of membrane;MF:ATPase activity, coupled to transmembrane movement of substances;MF:ATPase activity;MF:ATP binding;	K05664;K05658	ABCB11;ABCB1, CD243	map02010	ABC transporters)	COG1132	V:Defense mechanisms)	sp|Q9QY30|ABCBB_MOUSE;	Bile salt export pump OS=Mus musculus OX=10090 GN=Abcb11 PE=1 SV=2;	------	------	------
TRINITY_DN60356_c0_g1	ABC transporter ATP-binding protein ARB1-like [Quercus suber])	0	0	0	0	1.58	0	0	0.526667	GO:0016887;GO:0005524	MF:ATPase activity;MF:ATP binding;	K06185	ABCF2	------	------	COG0488	S:Function unknown)	sp|P40024|ARB1_YEAST;	ABC transporter ATP-binding protein ARB1 OS=Saccharomyces cerevisiae;	------	------	------
TRINITY_DN60865_c0_g1	hypothetical protein FH972_021517 [Carpinus fangiana])	0	0	0	0	3.9	0	0	1.3	GO:0016021;GO:0042626;GO:0016887;GO:0005524	CC:integral component of membrane;MF:ATPase activity, coupled to transmembrane movement of substances;MF:ATPase activity;MF:ATP binding;	------	------	------	------	COG1132	S:Function unknown)	sp|A0A0D1CZ63|FER6_USTMA;	Multidrug resistance protein fer6 OS=Ustilago maydis;	PF00664	ABC_membrane	ABC transporter transmembrane region
TRINITY_DN65359_c0_g1	ABC transporter C family member 2 isoform X2 [Cucumis sativus])	0	0	0	0	7.04	0	0	2.34667	GO:0055085;GO:0016021;GO:0016020;GO:0000325;GO:0005774;GO:0042626;GO:0016887;GO:0005524	BP:transmembrane transport;CC:integral component of membrane;CC:membrane;CC:plant-type vacuole;CC:vacuolar membrane;MF:ATPase activity, coupled to transmembrane movement of substances;MF:ATPase activity;MF:ATP binding;	------	------	------	------	------	------	sp|Q8VI47|MRP2_MOUSE;	Canalicular multispecific organic anion transporter 1 OS=Mus musculus OX=10090 GN=Abcc2 PE=1 SV=2;	PF00664	ABC_membrane	ABC transporter transmembrane region
TRINITY_DN65676_c0_g1	unnamed protein product, partial [Vitis vinifera])	0	0	0	0	2.11	0	0	0.703333	GO:0055085;GO:0016021;GO:0016020;GO:0000325;GO:0005774;GO:0042626;GO:0016887;GO:0005524	BP:transmembrane transport;CC:integral component of membrane;CC:membrane;CC:plant-type vacuole;CC:vacuolar membrane;MF:ATPase activity, coupled to transmembrane movement of substances;MF:ATPase activity;MF:ATP binding;	K05668;cmk;K05665	ABCC5;;ABCC1	map02010	ABC transporters)	COG1132	P:Inorganic ion transport and metabolism)	sp|O88563|MRP3_RAT;	Canalicular multispecific organic anion transporter 2 OS=Rattus norvegicus OX=10116 GN=Abcc3 PE=1 SV=1;	PF00005;PF13555	ABC_tran;AAA_29	ABC transporter;P-loop containing region of AAA domain
TRINITY_DN66524_c0_g2	leptomycin B resistance protein pmd1-like [Quercus suber])	0	0	0	2.32	0	0	0	0.773333	GO:0016021;GO:0042626;GO:0016887;GO:0005524	CC:integral component of membrane;MF:ATPase activity, coupled to transmembrane movement of substances;MF:ATPase activity;MF:ATP binding;	K05658	ABCB1, CD243	map02010	ABC transporters)	------	------	sp|Q4WTT9|MDR1_ASPFU;	ABC multidrug transporter mdr1 OS=Neosartorya fumigata;	PF00664;PF00005;PF02463	ABC_membrane;ABC_tran;SMC_N	ABC transporter transmembrane region;ABC transporter;RecF/RecN/SMC N terminal domain
TRINITY_DN66524_c1_g2	hypothetical protein FH972_023597 [Carpinus fangiana])	0	0	0	1.18	0	0	0	0.393333	GO:0055085;GO:0016021;GO:0042626;GO:0016887;GO:0005524	BP:transmembrane transport;CC:integral component of membrane;MF:ATPase activity, coupled to transmembrane movement of substances;MF:ATPase activity;MF:ATP binding;	K05658	ABCB1, CD243	map02010	ABC transporters)	------	------	sp|Q4WTT9|MDR1_ASPFU;	ABC multidrug transporter mdr1 OS=Neosartorya fumigata;	PF00005;PF09818	ABC_tran;ABC_ATPase	ABC transporter;Predicted ATPase of the ABC class
TRINITY_DN66579_c0_g1	hypothetical protein FH972_021496 [Carpinus fangiana])	0	0	0	0	0	7.53	0	2.51	GO:0055085;GO:0016021;GO:0005886;GO:0042025;GO:0042626;GO:0016887;GO:0005524	BP:transmembrane transport;CC:integral component of membrane;CC:plasma membrane;CC:host cell nucleus;MF:ATPase activity, coupled to transmembrane movement of substances;MF:ATPase activity;MF:ATP binding;	------	------	------	------	COG1131	S:Function unknown)	sp|D4AYW0|ABCG1_ARTBC;	ABC transporter G family member ARB_01379 OS=Arthroderma benhamiae;	PF19055	ABC2_membrane_7	ABC-2 type transporter
TRINITY_DN68269_c0_g2	ABC transporter G family member 11 [Malus domestica])	0	0	0	4.65	0	0	0	1.55	GO:0055085;GO:0016021;GO:0005886;GO:0042626;GO:0016887;GO:0005524	BP:transmembrane transport;CC:integral component of membrane;CC:plasma membrane;MF:ATPase activity, coupled to transmembrane movement of substances;MF:ATPase activity;MF:ATP binding;	------	------	------	------	COG1131	V:Defense mechanisms)	sp|Q8RXN0|AB11G_ARATH;	ABC transporter G family member 11 OS=Arabidopsis thaliana OX=3702 GN=ABCG11 PE=1 SV=1;	PF19055	ABC2_membrane_7	ABC-2 type transporter
TRINITY_DN69656_c0_g2		0	0	0	0	0	5.19	0	1.73	------	------	------	------	------	------	COG1131;COG0842	L:Replication, recombination and repair);	sp|Q54HM0|ABCGG_DICDI;	ABC transporter G family member 16 OS=Dictyostelium discoideum OX=44689 GN=abcG16 PE=3 SV=1;	PF01061	ABC2_membrane	ABC-2 type transporter
TRINITY_DN70622_c0_g1	hypothetical protein FH972_023675 [Carpinus fangiana])	0	0	0	0	3.72	0	0	1.24	GO:0030001;GO:0016021;GO:0046872;GO:0016887;GO:0005524	BP:metal ion transport;CC:integral component of membrane;MF:metal ion binding;MF:ATPase activity;MF:ATP binding;	K06185	ABCF2	------	------	------	------	sp|O42943|YBP8_SCHPO;	Uncharacterized ABC transporter ATP-binding protein C16H5.08c OS=Schizosaccharomyces pombe;	PF00005;PF12848;PF13304;PF13555;PF13175;PF13521;PF03193	ABC_tran;ABC_tran_Xtn;AAA_21;AAA_29;AAA_15;AAA_28;RsgA_GTPase	ABC transporter;ABC transporter;AAA domain, putative AbiEii toxin, Type IV TA system;P-loop containing region of AAA domain;AAA ATPase domain;AAA domain;RsgA GTPase
TRINITY_DN70912_c0_g1		0	0	0	0	13.11	0	0	4.37	------	------	K03013	RPB5, POLR2E	map03020	RNA polymerase)	COG2012	O:Posttranslational modification, protein turnover, chaperones)	sp|Q2T9T3|RPAB1_BOVIN;	DNA-directed RNA polymerases I, II, and III subunit RPABC1 OS=Bos taurus OX=9913 GN=POLR2E PE=1 SV=1;	PF03871	RNA_pol_Rpb5_N	RNA polymerase Rpb5, N-terminal domain
TRINITY_DN75155_c0_g2	ATP-binding cassette sub-family D member 1-like [Rhodamnia argentea])	0	0	0	0	0	1.35	0	0.45	GO:0015916;GO:0006744;GO:0010030;GO:0046861;GO:0016021;GO:0042626;GO:0005524;GO:0016887	BP:fatty-acyl-CoA transport;BP:ubiquinone biosynthetic process;BP:positive regulation of seed germination;CC:glyoxysomal membrane;CC:integral component of membrane;MF:ATPase activity, coupled to transmembrane movement of substances;MF:ATP binding;MF:ATPase activity;	K05677	ABCD3, PMP70	map04146;map02010	Peroxisome);ABC transporters)	COG4178	S:Function unknown)	sp|Q8T8P3|ABCD2_DICDI;	ABC transporter D family member 2 OS=Dictyostelium discoideum OX=44689 GN=abcD2 PE=3 SV=1;	------	------	------
TRINITY_DN78599_c0_g1	ABC transporter G family member 11 [Brassica rapa])	0	0	0	0	0	8.26	0	2.75333	GO:0016021;GO:0016887;GO:0005524	CC:integral component of membrane;MF:ATPase activity;MF:ATP binding;	------	------	------	------	COG1131	V:Defense mechanisms)	sp|Q8RXN0|AB11G_ARATH;	ABC transporter G family member 11 OS=Arabidopsis thaliana OX=3702 GN=ABCG11 PE=1 SV=1;	PF01061	ABC2_membrane	ABC-2 type transporter
TRINITY_DN80800_c0_g3	ABC transporter G family member 11-like [Quercus suber])	0	0	0	0	7.42	0	0	2.47333	GO:0016021;GO:0016887;GO:0005524	CC:integral component of membrane;MF:ATPase activity;MF:ATP binding;	------	------	------	------	------	------	sp|Q8RXN0|AB11G_ARATH;	ABC transporter G family member 11 OS=Arabidopsis thaliana OX=3702 GN=ABCG11 PE=1 SV=1;	PF01061;PF00005;PF19055;PF13304;PF03193;PF13555;PF13481	ABC2_membrane;ABC_tran;ABC2_membrane_7;AAA_21;RsgA_GTPase;AAA_29;AAA_25	ABC-2 type transporter;ABC transporter;ABC-2 type transporter;AAA domain, putative AbiEii toxin, Type IV TA system;RsgA GTPase;P-loop containing region of AAA domain;AAA domain
TRINITY_DN81341_c0_g2	ABC transporter G family member 32 isoform X2 [Rosa chinensis])	0	0	0	0	0	0	0	0	GO:0016021;GO:0016887;GO:0005524;GO:0015419	CC:integral component of membrane;MF:ATPase activity;MF:ATP binding;MF:ATPase-coupled sulfate transmembrane transporter activity;	------	------	------	------	COG0842	V:Defense mechanisms)	sp|Q2QV81|AB49G_ORYSJ;	ABC transporter G family member 49 OS=Oryza sativa subsp. japonica OX=39947 GN=ABCG49 PE=2 SV=3;	------	------	------
TRINITY_DN8719_c0_g2	ATP-binding cassette, subfamily D (ALD), member 2 [Salvia splendens])	0	0	0	0	13.22	0	0	4.40667	GO:0006744;GO:0015916;GO:0010030;GO:0016021;GO:0046861;GO:0042626;GO:0016887;GO:0005524	BP:ubiquinone biosynthetic process;BP:fatty-acyl-CoA transport;BP:positive regulation of seed germination;CC:integral component of membrane;CC:glyoxysomal membrane;MF:ATPase activity, coupled to transmembrane movement of substances;MF:ATPase activity;MF:ATP binding;	K05678	ABCD4, PXMP1L	map04146;map02010	Peroxisome);ABC transporters)	COG4178	K:Transcription)	sp|O14678|ABCD4_HUMAN;	Lysosomal cobalamin transporter ABCD4 OS=Homo sapiens OX=9606 GN=ABCD4 PE=1 SV=1;	PF06472;PF00005;PF02463;PF13476	ABC_membrane_2;ABC_tran;SMC_N;AAA_23	ABC transporter transmembrane region 2;ABC transporter;RecF/RecN/SMC N terminal domain;AAA domain
TRINITY_DN90560_c0_g1	PREDICTED: ABC transporter G family member 14-like [Pyrus x bretschneideri])	0	0	0	5.05	0	0	0	1.68333	GO:0016021;GO:0016887;GO:0005524	CC:integral component of membrane;MF:ATPase activity;MF:ATP binding;	------	------	------	------	COG1131	S:Function unknown)	sp|Q9C6W5|AB14G_ARATH;	ABC transporter G family member 14 OS=Arabidopsis thaliana OX=3702 GN=ABCG14 PE=2 SV=1;	PF01061	ABC2_membrane	ABC-2 type transporter
TRINITY_DN90560_c0_g3	ABC transporter G family member 22-like [Helianthus annuus])	0	0	0	2.23	0	0	0	0.743333	GO:0055085;GO:0016021;GO:0005886;GO:0042626;GO:0016887;GO:0005524	BP:transmembrane transport;CC:integral component of membrane;CC:plasma membrane;MF:ATPase activity, coupled to transmembrane movement of substances;MF:ATPase activity;MF:ATP binding;	------	------	------	------	COG1131	V:Defense mechanisms)	sp|Q9FT51|AB27G_ARATH;	ABC transporter G family member 27 OS=Arabidopsis thaliana OX=3702 GN=ABCG27 PE=2 SV=1;	PF00005;PF03215;PF13191;PF13238;PF03193;PF13401;PF01637	ABC_tran;Rad17;AAA_16;AAA_18;RsgA_GTPase;AAA_22;ATPase_2	ABC transporter;Rad17 P-loop domain;AAA ATPase domain;AAA domain;RsgA GTPase;AAA domain;ATPase domain predominantly from Archaea
TRINITY_DN90918_c0_g1	PREDICTED: ABC transporter B family member 6 [Brassica oleracea var. oleracea])	0	0	0	0	0	6.95	0	2.31667	GO:0016021;GO:0005887;GO:0005886;GO:0005634;GO:0005829;GO:0042626;GO:0016887;GO:0005524	CC:integral component of membrane;CC:integral component of plasma membrane;CC:plasma membrane;CC:nucleus;CC:cytosol;MF:ATPase activity, coupled to transmembrane movement of substances;MF:ATPase activity;MF:ATP binding;	K05664;K05659;K05658	ABCB11;ABCB4;ABCB1, CD243	map02010	ABC transporters)	COG1132	V:Defense mechanisms)	sp|Q54BT3|ABCB2_DICDI;	ABC transporter B family member 2 OS=Dictyostelium discoideum OX=44689 GN=abcB2 PE=3 SV=1;	PF00664	ABC_membrane	ABC transporter transmembrane region
TRINITY_DN92460_c0_g1	hypothetical protein SOVF_080980 [Spinacia oleracea])	0	0	0	0	0	4.45	0	1.48333	GO:0055085;GO:0016021;GO:0005886;GO:0042626;GO:0016887;GO:0005524	BP:transmembrane transport;CC:integral component of membrane;CC:plasma membrane;MF:ATPase activity, coupled to transmembrane movement of substances;MF:ATPase activity;MF:ATP binding;	------	------	------	------	COG1131	S:Function unknown)	sp|Q7XA72|AB21G_ARATH;	ABC transporter G family member 21 OS=Arabidopsis thaliana OX=3702 GN=ABCG21 PE=2 SV=2;	------	------	------
TRINITY_DN96181_c0_g1	putative adenosinetriphosphatase [Lupinus albus])	0	0	0	0	1	1.65	0	0.883333	GO:0016887;GO:0005524	MF:ATPase activity;MF:ATP binding;	K06185	ABCF2	------	------	COG0488	O:Posttranslational modification, protein turnover, chaperones)	sp|Q9FJH6|AB1F_ARATH;	ABC transporter F family member 1 OS=Arabidopsis thaliana OX=3702 GN=ABCF1 PE=2 SV=1;	PF00005	ABC_tran	ABC transporter
TRINITY_DN97911_c0_g1	hypothetical protein AXX17_ATUG04710 [Arabidopsis thaliana])	0	0	0	0	1.66	0	0	0.553333	GO:0055085;GO:0016021;GO:0042626;GO:0016887;GO:0005524	BP:transmembrane transport;CC:integral component of membrane;MF:ATPase activity, coupled to transmembrane movement of substances;MF:ATPase activity;MF:ATP binding;	------	------	------	------	ENOG410XPIZ	S:Function unknown)	sp|P60753|MSBA_ECO57;	Lipid A export ATP-binding/permease protein MsbA OS=Escherichia coli O157:H7 OX=83334 GN=msbA PE=1 SV=1;	PF00005;PF13175;PF13304	ABC_tran;AAA_15;AAA_21	ABC transporter;AAA ATPase domain;AAA domain, putative AbiEii toxin, Type IV TA system
TRINITY_DN97979_c0_g1	hypothetical protein FH972_023675 [Carpinus fangiana])	0	0	0	0	0	0	0	0	GO:0005886;GO:0016887;GO:0005524	CC:plasma membrane;MF:ATPase activity;MF:ATP binding;	K06185	ABCF2	------	------	COG0488	S:Function unknown)	sp|P40024|ARB1_YEAST;	ABC transporter ATP-binding protein ARB1 OS=Saccharomyces cerevisiae;	PF00005;PF13555	ABC_tran;AAA_29	ABC transporter;P-loop containing region of AAA domain
TRINITY_DN98268_c0_g1	ABC transporter D family member 1 isoform X2 [Amborella trichopoda])	0	0	0	0	0	1.37	0	0.456667	GO:0015916;GO:0006744;GO:0010030;GO:0046861;GO:0016021;GO:0042626;GO:0005524;GO:0016887	BP:fatty-acyl-CoA transport;BP:ubiquinone biosynthetic process;BP:positive regulation of seed germination;CC:glyoxysomal membrane;CC:integral component of membrane;MF:ATPase activity, coupled to transmembrane movement of substances;MF:ATP binding;MF:ATPase activity;	------	------	------	------	COG4178	S:Function unknown)	sp|Q94FB9|AB1D_ARATH;	ABC transporter D family member 1 OS=Arabidopsis thaliana OX=3702 GN=ABCD1 PE=1 SV=1;	------	------	------
TRINITY_DN99450_c0_g1	LOW QUALITY PROTEIN: ATP-dependent bile acid permease-like [Quercus suber])	0	0	0	1.98	0	0	0	0.66	GO:0016021;GO:0042626;GO:0016887;GO:0005524	CC:integral component of membrane;MF:ATPase activity, coupled to transmembrane movement of substances;MF:ATPase activity;MF:ATP binding;	------	------	------	------	------	------	sp|Q6FWS5|YBT1_CANGA;	Pleiotropic ABC efflux transporter of multiple drugs YBT1 OS=Candida glabrata;	PF00664	ABC_membrane	ABC transporter transmembrane region
TRINITY_DN99536_c0_g1	unknown [Picea sitchensis])	0	0	0	0.44	0.89	0.51	0	0.613333	GO:0055085;GO:0016021;GO:0005886;GO:0042626;GO:0016887;GO:0005524	BP:transmembrane transport;CC:integral component of membrane;CC:plasma membrane;MF:ATPase activity, coupled to transmembrane movement of substances;MF:ATPase activity;MF:ATP binding;	------	------	------	------	COG1131	S:Function unknown)	sp|Q93YS4|AB22G_ARATH;	ABC transporter G family member 22 OS=Arabidopsis thaliana OX=3702 GN=ABCG22 PE=1 SV=1;	PF00005;PF13304;PF19055;PF03193;PF13555	ABC_tran;AAA_21;ABC2_membrane_7;RsgA_GTPase;AAA_29	ABC transporter;AAA domain, putative AbiEii toxin, Type IV TA system;ABC-2 type transporter;RsgA GTPase;P-loop containing region of AAA domain

## Sheet: MFS
Gene_id	NR description	CE4	CE2	CE1	CK3	CK2	CK1	CE	CK	GO_id	GO_term	KO_id	KO_name	Pathway_id	Pathway_definition	EggNOG_id	EggNOG_Functional Categories	Swiss-Prot_hit-name	Swiss-Prot_description	Pfam_id	Domain	Domain description
TRINITY_DN688_c0_g1	hypothetical protein F0562_000486 [Nyssa sinensis])	359.67	230.41	157.04	178.51	183.21	183.64	249.04	181.787	GO:0006817;GO:0016021;GO:0005315	BP:phosphate ion transport;CC:integral component of membrane;MF:inorganic phosphate transmembrane transporter activity;	K08176	PHO84	------	------	ENOG410ZVN7	G:Carbohydrate transport and metabolism)	sp|B2CPI5|PHT13_PETHY;	Low affinity inorganic phosphate transporter 3 OS=Petunia hybrida OX=4102 GN=PT3 PE=2 SV=1;	PF00083;PF07690	Sugar_tr;MFS_1	Sugar (and other) transporter;Major Facilitator Superfamily	TRINITY_DN688_c0_g1,hypothetical protein F0562_000486 [Nyssa sinensis]),359.67,230.41,157.04,178.51,183.21,183.64,249.04,181.786667,GO:0006817;GO:0016021;GO:0005315,BP:phosphate ion transport;CC:integral component of membrane;MF:inorganic phosphate transmembrane transporter activity;,K08176,PHO84,------,------,ENOG410ZVN7,G:Carbohydrate transport and metabolism),sp|B2CPI5|PHT13_PETHY;,Low affinit…
TRINITY_DN2730_c0_g1	phosphate transporter [Cunninghamia lanceolata])	147.99	469.22	112.55	373.69	205.16	3.1	243.253	193.983	GO:0006817;GO:0016021;GO:0005315;GO:0016747	BP:phosphate ion transport;CC:integral component of membrane;MF:inorganic phosphate transmembrane transporter activity;MF:transferase activity, transferring acyl groups other than amino-acyl groups;	K08176	PHO84	------	------	ENOG410ZVN7	S:Function unknown)	sp|Q8H6G8|PHT18_ORYSJ;	Probable inorganic phosphate transporter 1-8 OS=Oryza sativa subsp. japonica OX=39947 GN=PHT1-8 PE=2 SV=1;	PF00083;PF07690	Sugar_tr;MFS_1	Sugar (and other) transporter;Major Facilitator Superfamily	TRINITY_DN2730_c0_g1,phosphate transporter [Cunninghamia lanceolata]),147.99,469.22,112.55,373.69,205.16,3.1,243.253333,193.983333,GO:0006817;GO:0016021;GO:0005315;GO:0016747,BP:phosphate ion transport;CC:integral component of membrane;MF:inorganic phosphate transmembrane transporter activity;MF:transferase activity, transferring acyl groups other than amino-acyl groups;,K08176,PHO84,------,-----…
TRINITY_DN1503_c0_g2	NRT2 family transporter [Pinus pinaster])	206.7	260.41	256.46	349.78	188.65	93.51	241.19	210.647	GO:0071249;GO:0015706;GO:0016021;GO:0009705;GO:0005886;GO:0022857;GO:0015112	BP:cellular response to nitrate;BP:nitrate transport;CC:integral component of membrane;CC:plant-type vacuole membrane;CC:plasma membrane;MF:transmembrane transporter activity;MF:nitrate transmembrane transporter activity;	K02575	NRT, narK, nrtP, nasA	map00910	Nitrogen metabolism)	COG2223	P:Inorganic ion transport and metabolism)	sp|P0DKG9|NRT21_ORYSJ;	High-affinity nitrate transporter 2.1 OS=Oryza sativa subsp. japonica OX=39947 GN=NRT2.1 PE=1 SV=1;	PF07690	MFS_1	Major Facilitator Superfamily	TRINITY_DN1503_c0_g2,NRT2 family transporter [Pinus pinaster]),206.7,260.41,256.46,349.78,188.65,93.51,241.19,210.646667,GO:0071249;GO:0015706;GO:0016021;GO:0009705;GO:0005886;GO:0022857;GO:0015112,BP:cellular response to nitrate;BP:nitrate transport;CC:integral component of membrane;CC:plant-type vacuole membrane;CC:plasma membrane;MF:transmembrane transporter activity;MF:nitrate transmembrane t…
TRINITY_DN5860_c0_g1	unknown [Picea sitchensis])	174.47	185.83	116.35	138.78	138.19	149.04	158.883	142.003	GO:0046323;GO:0008643;GO:0009941;GO:0016021;GO:0005887;GO:0005351;GO:0022857	BP:glucose import;BP:carbohydrate transport;CC:chloroplast envelope;CC:integral component of membrane;CC:integral component of plasma membrane;MF:suga;MF:transmembrane transporter activity;	------	------	------	------	ENOG410XNQK	G:Carbohydrate transport and metabolism)	sp|Q56ZZ7|PLST4_ARATH;	Plastidic glucose transporter 4 OS=Arabidopsis thaliana OX=3702 GN=At5g16150 PE=1 SV=2;	PF00083;PF07690	Sugar_tr;MFS_1	Sugar (and other) transporter;Major Facilitator Superfamily	TRINITY_DN5860_c0_g1,unknown [Picea sitchensis]),174.47,185.83,116.35,138.78,138.19,149.04,158.883333,142.003333,GO:0046323;GO:0008643;GO:0009941;GO:0016021;GO:0005887;GO:0005351;GO:0022857,BP:glucose import;BP:carbohydrate transport;CC:chloroplast envelope;CC:integral component of membrane;CC:integral component of plasma membrane;MF:suga;MF:transmembrane transporter activity;,------,------,-----…
TRINITY_DN2267_c0_g1	unknown [Picea sitchensis])	128.56	132.95	207.86	152.22	118.25	75.26	156.457	115.243	GO:0046323;GO:0005887;GO:0016021;GO:0022857;GO:0005351	BP:glucose import;CC:integral component of plasma membrane;CC:integral component of membrane;MF:transmembrane transporter activity;MF:suga;	------	------	------	------	ENOG410XNQK	G:Carbohydrate transport and metabolism)	sp|Q10PW9|MST4_ORYSJ;	Sugar transport protein MST4 OS=Oryza sativa subsp. japonica OX=39947 GN=MST4 PE=1 SV=1;	PF00083;PF07690	Sugar_tr;MFS_1	Sugar (and other) transporter;Major Facilitator Superfamily	TRINITY_DN2267_c0_g1,unknown [Picea sitchensis]),128.56,132.95,207.86,152.22,118.25,75.26,156.456667,115.243333,GO:0046323;GO:0005887;GO:0016021;GO:0022857;GO:0005351,BP:glucose import;CC:integral component of plasma membrane;CC:integral component of membrane;MF:transmembrane transporter activity;MF:suga;,------,------,------,------,ENOG410XNQK,G:Carbohydrate transport and metabolism),sp|Q10PW9|M…
TRINITY_DN5709_c0_g1	unnamed protein product [Digitaria exilis])	101.72	100.73	134.66	135.92	103.5	162.37	112.37	133.93	GO:0006817;GO:0016021;GO:0005315;GO:0015293	BP:phosphate ion transport;CC:integral component of membrane;MF:inorganic phosphate transmembrane transporter activity;MF:symporter activity;	K08176	PHO84	------	------	ENOG410ZVN7	G:Carbohydrate transport and metabolism)	sp|Q8H6H2|PHT14_ORYSJ;	Probable inorganic phosphate transporter 1-4 OS=Oryza sativa subsp. japonica OX=39947 GN=PHT1-4 PE=2 SV=1;	PF00083;PF07690	Sugar_tr;MFS_1	Sugar (and other) transporter;Major Facilitator Superfamily	TRINITY_DN5709_c0_g1,unnamed protein product [Digitaria exilis]),101.72,100.73,134.66,135.92,103.5,162.37,112.37,133.93,GO:0006817;GO:0016021;GO:0005315;GO:0015293,BP:phosphate ion transport;CC:integral component of membrane;MF:inorganic phosphate transmembrane transporter activity;MF:symporter activity;,K08176,PHO84,------,------,ENOG410ZVN7,G:Carbohydrate transport and metabolism),sp|Q8H6H2|PHT…
TRINITY_DN9803_c0_g1	sugar transport protein MST6-like [Nymphaea colorata])	69.77	112.88	138.14	138.71	77.78	55.21	106.93	90.5667	GO:0016021;GO:0022857	CC:integral component of membrane;MF:transmembrane transporter activity;	------	------	------	------	ENOG410XNQK	G:Carbohydrate transport and metabolism)	sp|Q6Z401|MST6_ORYSJ;	Sugar transport protein MST6 OS=Oryza sativa subsp. japonica OX=39947 GN=MST6 PE=1 SV=1;	PF00083;PF07690;PF06609	Sugar_tr;MFS_1;TRI12	Sugar (and other) transporter;Major Facilitator Superfamily;Fungal trichothecene efflux pump (TRI12)	TRINITY_DN9803_c0_g1,sugar transport protein MST6-like [Nymphaea colorata]),69.77,112.88,138.14,138.71,77.78,55.21,106.93,90.566667,GO:0016021;GO:0022857,CC:integral component of membrane;MF:transmembrane transporter activity;,------,------,------,------,ENOG410XNQK,G:Carbohydrate transport and metabolism),sp|Q6Z401|MST6_ORYSJ;,Sugar transport protein MST6 OS=Oryza sativa subsp. japonica OX=39947…
TRINITY_DN35649_c0_g1	putative phosphate transporter [Cryptomeria japonica])	29.41	70.02	149.29	95.53	32.31	68.17	82.9067	65.3367	GO:0006817;GO:0016021;GO:0005315	BP:phosphate ion transport;CC:integral component of membrane;MF:inorganic phosphate transmembrane transporter activity;	K08176	PHO84	------	------	ENOG410ZVN7	G:Carbohydrate transport and metabolism)	sp|A7KTC5|PHT11_PETHY;	Low affinity inorganic phosphate transporter 1 OS=Petunia hybrida OX=4102 GN=PT1 PE=2 SV=1;	PF00083;PF07690	Sugar_tr;MFS_1	Sugar (and other) transporter;Major Facilitator Superfamily	TRINITY_DN35649_c0_g1,putative phosphate transporter [Cryptomeria japonica]),29.41,70.02,149.29,95.53,32.31,68.17,82.906667,65.336667,GO:0006817;GO:0016021;GO:0005315,BP:phosphate ion transport;CC:integral component of membrane;MF:inorganic phosphate transmembrane transporter activity;,K08176,PHO84,------,------,ENOG410ZVN7,G:Carbohydrate transport and metabolism),sp|A7KTC5|PHT11_PETHY;,Low affin…
TRINITY_DN10546_c0_g1	high-affinity nitrate transporter 2.1 [Amborella trichopoda])	56.16	91.94	58.23	159.74	70.47	57.1	68.7767	95.77	GO:0071249;GO:0015706;GO:0016021;GO:0009705;GO:0005886;GO:0022857;GO:0015112	BP:cellular response to nitrate;BP:nitrate transport;CC:integral component of membrane;CC:plant-type vacuole membrane;CC:plasma membrane;MF:transmembrane transporter activity;MF:nitrate transmembrane transporter activity;	K02575	NRT, narK, nrtP, nasA	map00910	Nitrogen metabolism)	COG2223	P:Inorganic ion transport and metabolism)	sp|P0DKG9|NRT21_ORYSJ;	High-affinity nitrate transporter 2.1 OS=Oryza sativa subsp. japonica OX=39947 GN=NRT2.1 PE=1 SV=1;	PF07690	MFS_1	Major Facilitator Superfamily	TRINITY_DN10546_c0_g1,high-affinity nitrate transporter 2.1 [Amborella trichopoda]),56.16,91.94,58.23,159.74,70.47,57.1,68.776667,95.77,GO:0071249;GO:0015706;GO:0016021;GO:0009705;GO:0005886;GO:0022857;GO:0015112,BP:cellular response to nitrate;BP:nitrate transport;CC:integral component of membrane;CC:plant-type vacuole membrane;CC:plasma membrane;MF:transmembrane transporter activity;MF:nitrate …
TRINITY_DN12213_c0_g1	unknown [Picea sitchensis])	62.26	45.89	83.9	53.57	42.44	61.25	64.0167	52.42	GO:0046323;GO:0005887;GO:0016021;GO:0022857;GO:0005351	BP:glucose import;CC:integral component of plasma membrane;CC:integral component of membrane;MF:transmembrane transporter activity;MF:suga;	------	------	------	------	ENOG410XNQK	K:Transcription)	sp|Q0WUU6|PLT4_ARATH;	Probable polyol transporter 4 OS=Arabidopsis thaliana OX=3702 GN=PLT4 PE=2 SV=1;	PF00083;PF07690	Sugar_tr;MFS_1	Sugar (and other) transporter;Major Facilitator Superfamily	TRINITY_DN12213_c0_g1,unknown [Picea sitchensis]),62.26,45.89,83.9,53.57,42.44,61.25,64.016667,52.42,GO:0046323;GO:0005887;GO:0016021;GO:0022857;GO:0005351,BP:glucose import;CC:integral component of plasma membrane;CC:integral component of membrane;MF:transmembrane transporter activity;MF:suga;,------,------,------,------,ENOG410XNQK,K:Transcription),sp|Q0WUU6|PLT4_ARATH;,Probable polyol transpor…
TRINITY_DN1675_c0_g1	PREDICTED: sugar transporter ERD6-like 6 isoform X1 [Erythranthe guttata])	48.7	48.56	75.23	71.89	38.81	53.95	57.4967	54.8833	GO:0008643;GO:0046323;GO:0016021;GO:0005887;GO:0005351;GO:0022857	BP:carbohydrate transport;BP:glucose import;CC:integral component of membrane;CC:integral component of plasma membrane;MF:suga;MF:transmembrane transporter activity;	K08145	SLC2A8, GLUT8	------	------	ENOG410XNQK	G:Carbohydrate transport and metabolism)	sp|Q93YP9|ERDL4_ARATH;	Sugar transporter ERD6-like 4 OS=Arabidopsis thaliana OX=3702 GN=At1g19450 PE=2 SV=1;	PF00083;PF07690	Sugar_tr;MFS_1	Sugar (and other) transporter;Major Facilitator Superfamily	TRINITY_DN1675_c0_g1,PREDICTED: sugar transporter ERD6-like 6 isoform X1 [Erythranthe guttata]),48.7,48.56,75.23,71.89,38.81,53.95,57.496667,54.883333,GO:0008643;GO:0046323;GO:0016021;GO:0005887;GO:0005351;GO:0022857,BP:carbohydrate transport;BP:glucose import;CC:integral component of membrane;CC:integral component of plasma membrane;MF:suga;MF:transmembrane transporter activity;,K08145,SLC2A8, G…
TRINITY_DN1307_c0_g1	NPF family transporter [Pinus pinaster])	35.74	46.02	86.54	46.98	60.21	52.81	56.1	53.3333	GO:0006857;GO:0016021;GO:0022857	BP:oligopeptide transport;CC:integral component of membrane;MF:transmembrane transporter activity;	K14638	SLC15A3_4, PHT	------	------	COG3104	E:Amino acid transport and metabolism)	sp|P46032|PTR2_ARATH;	Protein NRT1/ PTR FAMILY 8.3 OS=Arabidopsis thaliana OX=3702 GN=NPF8.3 PE=1 SV=1;	PF00854;PF07690	PTR2;MFS_1	POT family;Major Facilitator Superfamily	TRINITY_DN1307_c0_g1,NPF family transporter [Pinus pinaster]),35.74,46.02,86.54,46.98,60.21,52.81,56.1,53.333333,GO:0006857;GO:0016021;GO:0022857,BP:oligopeptide transport;CC:integral component of membrane;MF:transmembrane transporter activity;,K14638,SLC15A3_4, PHT,------,------,COG3104,E:Amino acid transport and metabolism),sp|P46032|PTR2_ARATH;,Protein NRT1/ PTR FAMILY 8.3 OS=Arabidopsis thali…
TRINITY_DN26764_c0_g1	sugar transport protein MST4 [Phoenix dactylifera])	47.7	52.71	55.63	43.99	38.35	44.8	52.0133	42.38	GO:0009414;GO:0008643;GO:0046323;GO:0009651;GO:0009737;GO:0016021;GO:0005887;GO:0009506;GO:0005351;GO:0005358;GO:0022857	BP:response to water deprivation;BP:carbohydrate transport;BP:glucose import;BP:response to salt stress;BP:response to abscisic acid;CC:integral component of membrane;CC:integral component of plasma membrane;CC:plasmodesma;MF:suga;MF:high-affinity hydroge;MF:transmembrane transporter activity;	------	------	------	------	ENOG410XNQK	J:Translation, ribosomal structure and biogenesis)	sp|Q10PW9|MST4_ORYSJ;	Sugar transport protein MST4 OS=Oryza sativa subsp. japonica OX=39947 GN=MST4 PE=1 SV=1;	PF00083;PF07690	Sugar_tr;MFS_1	Sugar (and other) transporter;Major Facilitator Superfamily	TRINITY_DN26764_c0_g1,sugar transport protein MST4 [Phoenix dactylifera]),47.7,52.71,55.63,43.99,38.35,44.8,52.013333,42.38,GO:0009414;GO:0008643;GO:0046323;GO:0009651;GO:0009737;GO:0016021;GO:0005887;GO:0009506;GO:0005351;GO:0005358;GO:0022857,BP:response to water deprivation;BP:carbohydrate transport;BP:glucose import;BP:response to salt stress;BP:response to abscisic acid;CC:integral component…
TRINITY_DN10673_c0_g1	hypothetical protein AQUCO_05700107v1 [Aquilegia coerulea])	46.37	41.48	66.32	50.53	44.35	42.94	51.39	45.94	GO:0046323;GO:0005887;GO:0016021;GO:0022857;GO:0005351	BP:glucose import;CC:integral component of plasma membrane;CC:integral component of membrane;MF:transmembrane transporter activity;MF:suga;	------	------	------	------	ENOG410XNQK	G:Carbohydrate transport and metabolism)	sp|O04249|STP7_ARATH;	Sugar transport protein 7 OS=Arabidopsis thaliana OX=3702 GN=STP7 PE=1 SV=1;	PF00083;PF07690	Sugar_tr;MFS_1	Sugar (and other) transporter;Major Facilitator Superfamily	TRINITY_DN10673_c0_g1,hypothetical protein AQUCO_05700107v1 [Aquilegia coerulea]),46.37,41.48,66.32,50.53,44.35,42.94,51.39,45.94,GO:0046323;GO:0005887;GO:0016021;GO:0022857;GO:0005351,BP:glucose import;CC:integral component of plasma membrane;CC:integral component of membrane;MF:transmembrane transporter activity;MF:suga;,------,------,------,------,ENOG410XNQK,G:Carbohydrate transport and metab…
TRINITY_DN6200_c0_g1	PREDICTED: sugar transport protein 10 [Eucalyptus grandis])	35.97	33.82	81.49	57.51	30.26	37.91	50.4267	41.8933	GO:0046323;GO:0008643;GO:0016021;GO:0005887;GO:0005351;GO:0022857	BP:glucose import;BP:carbohydrate transport;CC:integral component of membrane;CC:integral component of plasma membrane;MF:suga;MF:transmembrane transporter activity;	------	------	------	------	ENOG410XNQK	G:Carbohydrate transport and metabolism)	sp|Q39228|STP4_ARATH;	Sugar transport protein 4 OS=Arabidopsis thaliana OX=3702 GN=STP4 PE=1 SV=1;	PF00083;PF07690	Sugar_tr;MFS_1	Sugar (and other) transporter;Major Facilitator Superfamily	TRINITY_DN6200_c0_g1,PREDICTED: sugar transport protein 10 [Eucalyptus grandis]),35.97,33.82,81.49,57.51,30.26,37.91,50.426667,41.893333,GO:0046323;GO:0008643;GO:0016021;GO:0005887;GO:0005351;GO:0022857,BP:glucose import;BP:carbohydrate transport;CC:integral component of membrane;CC:integral component of plasma membrane;MF:suga;MF:transmembrane transporter activity;,------,------,------,------,EN…
TRINITY_DN18724_c0_g1	Sugar carrier protein C [Ananas comosus])	48.82	39.66	53.52	43.4	63.71	49.74	47.3333	52.2833	GO:0046323;GO:0008643;GO:0016021;GO:0005887;GO:0005351;GO:0022857	BP:glucose import;BP:carbohydrate transport;CC:integral component of membrane;CC:integral component of plasma membrane;MF:suga;MF:transmembrane transporter activity;	------	------	------	------	ENOG410XNQK	G:Carbohydrate transport and metabolism)	sp|O04249|STP7_ARATH;	Sugar transport protein 7 OS=Arabidopsis thaliana OX=3702 GN=STP7 PE=1 SV=1;	PF00083;PF07690	Sugar_tr;MFS_1	Sugar (and other) transporter;Major Facilitator Superfamily	TRINITY_DN18724_c0_g1,Sugar carrier protein C [Ananas comosus]),48.82,39.66,53.52,43.4,63.71,49.74,47.333333,52.283333,GO:0046323;GO:0008643;GO:0016021;GO:0005887;GO:0005351;GO:0022857,BP:glucose import;BP:carbohydrate transport;CC:integral component of membrane;CC:integral component of plasma membrane;MF:suga;MF:transmembrane transporter activity;,------,------,------,------,ENOG410XNQK,G:Carboh…
TRINITY_DN81346_c0_g2	MFS_1 domain-containing protein, partial [Cephalotus follicularis])	45.5	42.1	45.99	24.48	47.12	52.66	44.53	41.42	GO:0006869;GO:0005765;GO:0016021;GO:0031902;GO:0022857	BP:lipid transport;CC:lysosomal membrane;CC:integral component of membrane;CC:late endosome membrane;MF:transmembrane transporter activity;	------	------	------	------	COG0477	G:Carbohydrate transport and metabolism)	sp|Q9FLG8|SPNS2_ARATH;	Probable sphingolipid transporter spinster homolog 2 OS=Arabidopsis thaliana OX=3702 GN=At5g64500 PE=2 SV=1;	PF07690;PF03137;PF00083;PF05449	MFS_1;OATP;Sugar_tr;Phage_holin_3_7	Major Facilitator Superfamily;Organic Anion Transporter Polypeptide (OATP) family;Sugar (and other) transporter;Putative 3TM holin, Phage_holin_3	TRINITY_DN81346_c0_g2,MFS_1 domain-containing protein, partial [Cephalotus follicularis]),45.5,42.1,45.99,24.48,47.12,52.66,44.53,41.42,GO:0006869;GO:0005765;GO:0016021;GO:0031902;GO:0022857,BP:lipid transport;CC:lysosomal membrane;CC:integral component of membrane;CC:late endosome membrane;MF:transmembrane transporter activity;,------,------,------,------,COG0477,G:Carbohydrate transport and met…
TRINITY_DN21245_c0_g1	hypothetical protein GQ55_2G255800 [Panicum hallii var. hallii])	42.4	54.41	36.41	50.33	26.08	26.41	44.4067	34.2733	GO:0046323;GO:0008643;GO:0016021;GO:0005887;GO:0005351;GO:0022857	BP:glucose import;BP:carbohydrate transport;CC:integral component of membrane;CC:integral component of plasma membrane;MF:suga;MF:transmembrane transporter activity;	------	------	------	------	ENOG410XNQK	G:Carbohydrate transport and metabolism)	sp|O04249|STP7_ARATH;	Sugar transport protein 7 OS=Arabidopsis thaliana OX=3702 GN=STP7 PE=1 SV=1;	PF00083;PF07690	Sugar_tr;MFS_1	Sugar (and other) transporter;Major Facilitator Superfamily	TRINITY_DN21245_c0_g1,hypothetical protein GQ55_2G255800 [Panicum hallii var. hallii]),42.4,54.41,36.41,50.33,26.08,26.41,44.406667,34.273333,GO:0046323;GO:0008643;GO:0016021;GO:0005887;GO:0005351;GO:0022857,BP:glucose import;BP:carbohydrate transport;CC:integral component of membrane;CC:integral component of plasma membrane;MF:suga;MF:transmembrane transporter activity;,------,------,------,----…
TRINITY_DN7172_c0_g1	unknown [Picea sitchensis])	43.84	41.32	42.02	27.17	46.08	68.54	42.3933	47.2633	GO:0016020;GO:0016021;GO:0015098	CC:membrane;CC:integral component of membrane;MF:molybdate ion transmembrane transporter activity;	------	------	------	------	ENOG410XSP5	G:Carbohydrate transport and metabolism)	sp|Q0VC03|MFSD5_BOVIN;	Molybdate-anion transporter OS=Bos taurus OX=9913 GN=MFSD5 PE=2 SV=1;	PF05631;PF07690	MFS_5;MFS_1	Sugar-tranasporters, 12 TM;Major Facilitator Superfamily	TRINITY_DN7172_c0_g1,unknown [Picea sitchensis]),43.84,41.32,42.02,27.17,46.08,68.54,42.393333,47.263333,GO:0016020;GO:0016021;GO:0015098,CC:membrane;CC:integral component of membrane;MF:molybdate ion transmembrane transporter activity;,------,------,------,------,ENOG410XSP5,G:Carbohydrate transport and metabolism),sp|Q0VC03|MFSD5_BOVIN;,Molybdate-anion transporter OS=Bos taurus OX=9913 GN=MFSD5…
TRINITY_DN25566_c0_g1	hypothetical protein B296_00051694, partial [Ensete ventricosum])	50.22	31.98	38.58	51.35	36.07	37.1	40.26	41.5067	GO:0006817;GO:0016021;GO:0005315	BP:phosphate ion transport;CC:integral component of membrane;MF:inorganic phosphate transmembrane transporter activity;	K08176	PHO84	------	------	ENOG410ZVN7	G:Carbohydrate transport and metabolism)	sp|A7KTC5|PHT11_PETHY;	Low affinity inorganic phosphate transporter 1 OS=Petunia hybrida OX=4102 GN=PT1 PE=2 SV=1;	PF00083;PF07690	Sugar_tr;MFS_1	Sugar (and other) transporter;Major Facilitator Superfamily	TRINITY_DN25566_c0_g1,hypothetical protein B296_00051694, partial [Ensete ventricosum]),50.22,31.98,38.58,51.35,36.07,37.1,40.26,41.506667,GO:0006817;GO:0016021;GO:0005315,BP:phosphate ion transport;CC:integral component of membrane;MF:inorganic phosphate transmembrane transporter activity;,K08176,PHO84,------,------,ENOG410ZVN7,G:Carbohydrate transport and metabolism),sp|A7KTC5|PHT11_PETHY;,Low …
TRINITY_DN13631_c0_g1	PREDICTED: probable sulfate transporter 4.2 isoform X1 [Juglans regia])	66	28.4	20.83	18.66	44.22	38.05	38.41	33.6433	GO:0016021;GO:0005887;GO:0008271;GO:0015301	CC:integral component of membrane;CC:integral component of plasma membrane;MF:secondary active sulfate transmembrane transporter activity;MF:anio;	K18059	SULTR4	------	------	COG0659	S:Function unknown)	sp|Q8GYH8|SUT42_ARATH;	Probable sulfate transporter 4.2 OS=Arabidopsis thaliana OX=3702 GN=SULTR4;2 PE=2 SV=2;	PF00916;PF01740;PF16983	Sulfate_transp;STAS;MFS_MOT1	Sulfate permease family;STAS domain;Molybdate transporter of MFS superfamily	TRINITY_DN13631_c0_g1,PREDICTED: probable sulfate transporter 4.2 isoform X1 [Juglans regia]),66,28.4,20.83,18.66,44.22,38.05,38.41,33.643333,GO:0016021;GO:0005887;GO:0008271;GO:0015301,CC:integral component of membrane;CC:integral component of plasma membrane;MF:secondary active sulfate transmembrane transporter activity;MF:anio;,K18059,SULTR4,------,------,COG0659,S:Function unknown),sp|Q8GYH8|…
TRINITY_DN22045_c0_g1	PREDICTED: sugar transport protein 13-like [Solanum tuberosum])	35.35	45.69	29.1	36.22	41.21	23.56	36.7133	33.6633	GO:0046323;GO:0008643;GO:0016021;GO:0005887;GO:0005351;GO:0022857;GO:0032440	BP:glucose import;BP:carbohydrate transport;CC:integral component of membrane;CC:integral component of plasma membrane;MF:suga;MF:transmembrane transporter activity;MF:2-alkenal reductase [NA;	------	------	------	------	ENOG410XNQK	G:Carbohydrate transport and metabolism)	sp|Q94AZ2|STP13_ARATH;	Sugar transport protein 13 OS=Arabidopsis thaliana OX=3702 GN=STP13 PE=1 SV=2;	PF00083;PF07690	Sugar_tr;MFS_1	Sugar (and other) transporter;Major Facilitator Superfamily	TRINITY_DN22045_c0_g1,PREDICTED: sugar transport protein 13-like [Solanum tuberosum]),35.35,45.69,29.1,36.22,41.21,23.56,36.713333,33.663333,GO:0046323;GO:0008643;GO:0016021;GO:0005887;GO:0005351;GO:0022857;GO:0032440,BP:glucose import;BP:carbohydrate transport;CC:integral component of membrane;CC:integral component of plasma membrane;MF:suga;MF:transmembrane transporter activity;MF:2-alkenal red…
TRINITY_DN2701_c0_g1	hypothetical protein EUGRSUZ_H04799 [Eucalyptus grandis])	42.01	29.03	38.71	35.34	36.19	40.82	36.5833	37.45	GO:0016021;GO:0022857	CC:integral component of membrane;MF:transmembrane transporter activity;	------	------	------	------	COG0477	O:Posttranslational modification, protein turnover, chaperones)	------	------	PF07690	MFS_1	Major Facilitator Superfamily	TRINITY_DN2701_c0_g1,hypothetical protein EUGRSUZ_H04799 [Eucalyptus grandis]),42.01,29.03,38.71,35.34,36.19,40.82,36.583333,37.45,GO:0016021;GO:0022857,CC:integral component of membrane;MF:transmembrane transporter activity;,------,------,------,------,COG0477,O:Posttranslational modification, protein turnover, chaperones),------,------,PF07690,MFS_1,Major Facilitator Superfamily
TRINITY_DN5357_c0_g1	unknown [Picea sitchensis])	45.33	41.91	22.09	43.94	51.79	44.51	36.4433	46.7467	GO:0016021;GO:0022857	CC:integral component of membrane;MF:transmembrane transporter activity;	------	------	------	------	ENOG410XSE0	G:Carbohydrate transport and metabolism)	sp|Q8RWN2|ZIF1_ARATH;	Protein ZINC INDUCED FACILITATOR 1 OS=Arabidopsis thaliana OX=3702 GN=ZIF1 PE=1 SV=2;	PF07690;PF00083	MFS_1;Sugar_tr	Major Facilitator Superfamily;Sugar (and other) transporter	TRINITY_DN5357_c0_g1,unknown [Picea sitchensis]),45.33,41.91,22.09,43.94,51.79,44.51,36.443333,46.746667,GO:0016021;GO:0022857,CC:integral component of membrane;MF:transmembrane transporter activity;,------,------,------,------,ENOG410XSE0,G:Carbohydrate transport and metabolism),sp|Q8RWN2|ZIF1_ARATH;,Protein ZINC INDUCED FACILITATOR 1 OS=Arabidopsis thaliana OX=3702 GN=ZIF1 PE=1 SV=2;,PF07690;PF…
TRINITY_DN3934_c0_g1	unknown [Picea sitchensis])	37.04	38.3	29.34	33.8	34.77	45.45	34.8933	38.0067	GO:0046323;GO:0005887;GO:0016021;GO:0022857;GO:0005351	BP:glucose import;CC:integral component of plasma membrane;CC:integral component of membrane;MF:transmembrane transporter activity;MF:suga;	------	------	------	------	ENOG410XNQK	G:Carbohydrate transport and metabolism)	sp|Q0WWW9|XYLL3_ARATH;	D-xylose-proton symporter-like 3, chloroplastic OS=Arabidopsis thaliana OX=3702 GN=At5g59250 PE=1 SV=2;	PF00083;PF07690	Sugar_tr;MFS_1	Sugar (and other) transporter;Major Facilitator Superfamily	TRINITY_DN3934_c0_g1,unknown [Picea sitchensis]),37.04,38.3,29.34,33.8,34.77,45.45,34.893333,38.006667,GO:0046323;GO:0005887;GO:0016021;GO:0022857;GO:0005351,BP:glucose import;CC:integral component of plasma membrane;CC:integral component of membrane;MF:transmembrane transporter activity;MF:suga;,------,------,------,------,ENOG410XNQK,G:Carbohydrate transport and metabolism),sp|Q0WWW9|XYLL3_ARAT…
TRINITY_DN14071_c0_g2	unknown [Picea sitchensis])	35.88	33.77	33.64	51.2	32.66	40.35	34.43	41.4033	GO:0046323;GO:0008643;GO:0016021;GO:0005887;GO:0005351;GO:0022857	BP:glucose import;BP:carbohydrate transport;CC:integral component of membrane;CC:integral component of plasma membrane;MF:suga;MF:transmembrane transporter activity;	------	------	------	------	ENOG410XNQK	G:Carbohydrate transport and metabolism)	sp|Q10PW9|MST4_ORYSJ;	Sugar transport protein MST4 OS=Oryza sativa subsp. japonica OX=39947 GN=MST4 PE=1 SV=1;	PF00083;PF07690;PF13347	Sugar_tr;MFS_1;MFS_2	Sugar (and other) transporter;Major Facilitator Superfamily;MFS/sugar transport protein	TRINITY_DN14071_c0_g2,unknown [Picea sitchensis]),35.88,33.77,33.64,51.2,32.66,40.35,34.43,41.403333,GO:0046323;GO:0008643;GO:0016021;GO:0005887;GO:0005351;GO:0022857,BP:glucose import;BP:carbohydrate transport;CC:integral component of membrane;CC:integral component of plasma membrane;MF:suga;MF:transmembrane transporter activity;,------,------,------,------,ENOG410XNQK,G:Carbohydrate transport a…
TRINITY_DN5003_c0_g1	sucrose transport protein SUT4 isoform X1 [Elaeis guineensis])	35.62	34.3	30.66	33.92	32.87	38.6	33.5267	35.13	GO:0009611;GO:0005794;GO:0016021;GO:0016020;GO:0090406;GO:0008506;GO:0008515;GO:0022857	BP:response to wounding;CC:Golgi apparatus;CC:integral component of membrane;CC:membrane;CC:pollen tube;MF:sucros;MF:sucrose transmembrane transporter activity;MF:transmembrane transporter activity;	K15378	SLC45A1_2_4	------	------	ENOG410XPTR;ENOG4110HX2	U:Intracellular trafficking, secretion, and vesicular transport);G:Carbohydrate transport and metabolism)	sp|O80605|SUC3_ARATH;	Sucrose transport protein SUC3 OS=Arabidopsis thaliana OX=3702 GN=SUC3 PE=1 SV=1;	PF07690;PF13347;PF03209	MFS_1;MFS_2;PUCC	Major Facilitator Superfamily;MFS/sugar transport protein;PUCC protein	TRINITY_DN5003_c0_g1,sucrose transport protein SUT4 isoform X1 [Elaeis guineensis]),35.62,34.3,30.66,33.92,32.87,38.6,33.526667,35.13,GO:0009611;GO:0005794;GO:0016021;GO:0016020;GO:0090406;GO:0008506;GO:0008515;GO:0022857,BP:response to wounding;CC:Golgi apparatus;CC:integral component of membrane;CC:membrane;CC:pollen tube;MF:sucros;MF:sucrose transmembrane transporter activity;MF:transmembrane …
TRINITY_DN10546_c0_g2	high-affinity nitrate transporter 2.1 [Amborella trichopoda])	25.84	43.84	24.74	76.18	27.76	24.33	31.4733	42.7567	GO:0071249;GO:0015706;GO:0016021;GO:0009705;GO:0005886;GO:0022857;GO:0015112	BP:cellular response to nitrate;BP:nitrate transport;CC:integral component of membrane;CC:plant-type vacuole membrane;CC:plasma membrane;MF:transmembrane transporter activity;MF:nitrate transmembrane transporter activity;	K02575	NRT, narK, nrtP, nasA	map00910	Nitrogen metabolism)	COG2223	P:Inorganic ion transport and metabolism)	sp|P0DKG9|NRT21_ORYSJ;	High-affinity nitrate transporter 2.1 OS=Oryza sativa subsp. japonica OX=39947 GN=NRT2.1 PE=1 SV=1;	PF07690	MFS_1	Major Facilitator Superfamily	TRINITY_DN10546_c0_g2,high-affinity nitrate transporter 2.1 [Amborella trichopoda]),25.84,43.84,24.74,76.18,27.76,24.33,31.473333,42.756667,GO:0071249;GO:0015706;GO:0016021;GO:0009705;GO:0005886;GO:0022857;GO:0015112,BP:cellular response to nitrate;BP:nitrate transport;CC:integral component of membrane;CC:plant-type vacuole membrane;CC:plasma membrane;MF:transmembrane transporter activity;MF:nitr…
TRINITY_DN7869_c0_g1	organic cation/carnitine transporter 7-like [Amborella trichopoda])	34.28	32.63	23.53	32.18	38.49	30.68	30.1467	33.7833	GO:0016021;GO:0005886;GO:0022857;GO:0090417;GO:0090416	CC:integral component of membrane;CC:plasma membrane;MF:transmembrane transporter activity;MF:N-methylnicotinate transporter activity;MF:nicotinate transporter activity;	------	------	------	------	ENOG410ZVDQ	G:Carbohydrate transport and metabolism)	sp|Q940M4|OCT7_ARATH;	Organic cation/carnitine transporter 7 OS=Arabidopsis thaliana OX=3702 GN=OCT7 PE=2 SV=1;	PF00083;PF07690	Sugar_tr;MFS_1	Sugar (and other) transporter;Major Facilitator Superfamily	TRINITY_DN7869_c0_g1,organic cation/carnitine transporter 7-like [Amborella trichopoda]),34.28,32.63,23.53,32.18,38.49,30.68,30.146667,33.783333,GO:0016021;GO:0005886;GO:0022857;GO:0090417;GO:0090416,CC:integral component of membrane;CC:plasma membrane;MF:transmembrane transporter activity;MF:N-methylnicotinate transporter activity;MF:nicotinate transporter activity;,------,------,------,------,E…
TRINITY_DN37464_c0_g2	hypothetical protein C4D60_Mb05t30660 [Musa balbisiana])	29.7	33.86	26.66	31.62	30.26	52.47	30.0733	38.1167	GO:0031969;GO:0009536;GO:0016021;GO:0022857;GO:0005315	CC:chloroplast membrane;CC:plastid;CC:integral component of membrane;MF:transmembrane transporter activity;MF:inorganic phosphate transmembrane transporter activity;	K08193	SLC17A	------	------	ENOG410XPWC	G:Carbohydrate transport and metabolism)	sp|Q66GI9|ANTR4_ARATH;	Probable anion transporter 4, chloroplastic OS=Arabidopsis thaliana OX=3702 GN=ANTR4 PE=2 SV=1;	PF07690	MFS_1	Major Facilitator Superfamily	TRINITY_DN37464_c0_g2,hypothetical protein C4D60_Mb05t30660 [Musa balbisiana]),29.7,33.86,26.66,31.62,30.26,52.47,30.073333,38.116667,GO:0031969;GO:0009536;GO:0016021;GO:0022857;GO:0005315,CC:chloroplast membrane;CC:plastid;CC:integral component of membrane;MF:transmembrane transporter activity;MF:inorganic phosphate transmembrane transporter activity;,K08193,SLC17A,------,------,ENOG410XPWC,G:Ca…
TRINITY_DN2100_c0_g1	high-affinity nitrate transporter 2.1-like [Hevea brasiliensis])	46.03	5.87	32.91	10.4	21.96	42.84	28.27	25.0667	GO:0015706;GO:0071249;GO:0016021;GO:0009705;GO:0005886;GO:0022857;GO:0015112	BP:nitrate transport;BP:cellular response to nitrate;CC:integral component of membrane;CC:plant-type vacuole membrane;CC:plasma membrane;MF:transmembrane transporter activity;MF:nitrate transmembrane transporter activity;	K02575	NRT, narK, nrtP, nasA	map00910	Nitrogen metabolism)	COG2223	P:Inorganic ion transport and metabolism)	sp|P0DKG9|NRT21_ORYSJ;	High-affinity nitrate transporter 2.1 OS=Oryza sativa subsp. japonica OX=39947 GN=NRT2.1 PE=1 SV=1;	PF07690	MFS_1	Major Facilitator Superfamily	TRINITY_DN2100_c0_g1,high-affinity nitrate transporter 2.1-like [Hevea brasiliensis]),46.03,5.87,32.91,10.4,21.96,42.84,28.27,25.066667,GO:0015706;GO:0071249;GO:0016021;GO:0009705;GO:0005886;GO:0022857;GO:0015112,BP:nitrate transport;BP:cellular response to nitrate;CC:integral component of membrane;CC:plant-type vacuole membrane;CC:plasma membrane;MF:transmembrane transporter activity;MF:nitrate …
TRINITY_DN1184_c0_g1	Major facilitator superfamily [Macleaya cordata])	24.79	24.3	25.69	24.29	24.09	25.54	24.9267	24.64	GO:0016021;GO:0022857	CC:integral component of membrane;MF:transmembrane transporter activity;	------	------	------	------	ENOG410XSE0	G:Carbohydrate transport and metabolism)	sp|Q94BZ1|ZIFL1_ARATH;	Protein ZINC INDUCED FACILITATOR-LIKE 1 OS=Arabidopsis thaliana OX=3702 GN=ZIFL1 PE=2 SV=1;	PF07690	MFS_1	Major Facilitator Superfamily	TRINITY_DN1184_c0_g1,Major facilitator superfamily [Macleaya cordata]),24.79,24.3,25.69,24.29,24.09,25.54,24.926667,24.64,GO:0016021;GO:0022857,CC:integral component of membrane;MF:transmembrane transporter activity;,------,------,------,------,ENOG410XSE0,G:Carbohydrate transport and metabolism),sp|Q94BZ1|ZIFL1_ARATH;,Protein ZINC INDUCED FACILITATOR-LIKE 1 OS=Arabidopsis thaliana OX=3702 GN=ZIF…
TRINITY_DN4663_c0_g1	unknown [Picea sitchensis])	24.1	21.31	27.33	24.7	25.8	26.46	24.2467	25.6533	GO:0046323;GO:0005887;GO:0016021;GO:0022857;GO:0005351	BP:glucose import;CC:integral component of plasma membrane;CC:integral component of membrane;MF:transmembrane transporter activity;MF:suga;	------	------	------	------	ENOG410XNQK	G:Carbohydrate transport and metabolism)	sp|Q0WWW9|XYLL3_ARATH;	D-xylose-proton symporter-like 3, chloroplastic OS=Arabidopsis thaliana OX=3702 GN=At5g59250 PE=1 SV=2;	PF00083;PF07690	Sugar_tr;MFS_1	Sugar (and other) transporter;Major Facilitator Superfamily	TRINITY_DN4663_c0_g1,unknown [Picea sitchensis]),24.1,21.31,27.33,24.7,25.8,26.46,24.246667,25.653333,GO:0046323;GO:0005887;GO:0016021;GO:0022857;GO:0005351,BP:glucose import;CC:integral component of plasma membrane;CC:integral component of membrane;MF:transmembrane transporter activity;MF:suga;,------,------,------,------,ENOG410XNQK,G:Carbohydrate transport and metabolism),sp|Q0WWW9|XYLL3_ARATH…
TRINITY_DN383_c0_g1	probable folate-biopterin transporter 2 [Zea mays])	28.17	22.13	22.26	27.88	26.19	28.88	24.1867	27.65	GO:0016021	CC:integral component of membrane;	------	------	------	------	ENOG4110MUE	P:Inorganic ion transport and metabolism)	sp|Q9LEV7|FBT6_ARATH;	Probable folate-biopterin transporter 6 OS=Arabidopsis thaliana OX=3702 GN=At5g10820 PE=2 SV=1;	PF03092;PF07690	BT1;MFS_1	BT1 family;Major Facilitator Superfamily	TRINITY_DN383_c0_g1,probable folate-biopterin transporter 2 [Zea mays]),28.17,22.13,22.26,27.88,26.19,28.88,24.186667,27.65,GO:0016021,CC:integral component of membrane;,------,------,------,------,ENOG4110MUE,P:Inorganic ion transport and metabolism),sp|Q9LEV7|FBT6_ARATH;,Probable folate-biopterin transporter 6 OS=Arabidopsis thaliana OX=3702 GN=At5g10820 PE=2 SV=1;,PF03092;PF07690,BT1;MFS_1,BT1…
TRINITY_DN11924_c0_g1	unknown [Picea sitchensis])	19.54	22.56	28.06	33.74	21.88	20.49	23.3867	25.37	GO:0016021	CC:integral component of membrane;	------	------	------	------	ENOG410XRKZ	G:Carbohydrate transport and metabolism)	sp|Q9XIQ7|FBT7_ARATH;	Probable folate-biopterin transporter 7 OS=Arabidopsis thaliana OX=3702 GN=At1g64890 PE=2 SV=1;	PF03092;PF07690	BT1;MFS_1	BT1 family;Major Facilitator Superfamily	TRINITY_DN11924_c0_g1,unknown [Picea sitchensis]),19.54,22.56,28.06,33.74,21.88,20.49,23.386667,25.37,GO:0016021,CC:integral component of membrane;,------,------,------,------,ENOG410XRKZ,G:Carbohydrate transport and metabolism),sp|Q9XIQ7|FBT7_ARATH;,Probable folate-biopterin transporter 7 OS=Arabidopsis thaliana OX=3702 GN=At1g64890 PE=2 SV=1;,PF03092;PF07690,BT1;MFS_1,BT1 family;Major Facilitat…
TRINITY_DN5745_c0_g1	Sphingolipid transporter spinster like [Actinidia chinensis var. chinensis])	24.41	22.07	22.59	23.68	21.08	23.72	23.0233	22.8267	GO:0006869;GO:0005765;GO:0016021;GO:0031902;GO:0022857	BP:lipid transport;CC:lysosomal membrane;CC:integral component of membrane;CC:late endosome membrane;MF:transmembrane transporter activity;	K23677	SPNS	------	------	COG0477	S:Function unknown)	sp|Q9FLG8|SPNS2_ARATH;	Probable sphingolipid transporter spinster homolog 2 OS=Arabidopsis thaliana OX=3702 GN=At5g64500 PE=2 SV=1;	PF07690;PF03137;PF00083	MFS_1;OATP;Sugar_tr	Major Facilitator Superfamily;Organic Anion Transporter Polypeptide (OATP) family;Sugar (and other) transporter	TRINITY_DN5745_c0_g1,Sphingolipid transporter spinster like [Actinidia chinensis var. chinensis]),24.41,22.07,22.59,23.68,21.08,23.72,23.023333,22.826667,GO:0006869;GO:0005765;GO:0016021;GO:0031902;GO:0022857,BP:lipid transport;CC:lysosomal membrane;CC:integral component of membrane;CC:late endosome membrane;MF:transmembrane transporter activity;,K23677,SPNS,------,------,COG0477,S:Function unkno…
TRINITY_DN11186_c0_g1	unknown [Picea sitchensis])	22.81	22.87	23.12	22.75	18.1	30.05	22.9333	23.6333	GO:0090333;GO:0016021;GO:0009705;GO:0005886;GO:0022857;GO:0022821	BP:regulation of stomatal closure;CC:integral component of membrane;CC:plant-type vacuole membrane;CC:plasma membrane;MF:transmembrane transporter activity;MF:potassium ion antiporter activity;	------	------	------	------	ENOG410XSE0	G:Carbohydrate transport and metabolism)	sp|Q94BZ1|ZIFL1_ARATH;	Protein ZINC INDUCED FACILITATOR-LIKE 1 OS=Arabidopsis thaliana OX=3702 GN=ZIFL1 PE=2 SV=1;	PF07690;PF00083;PF12832	MFS_1;Sugar_tr;MFS_1_like	Major Facilitator Superfamily;Sugar (and other) transporter;MFS_1 like family	TRINITY_DN11186_c0_g1,unknown [Picea sitchensis]),22.81,22.87,23.12,22.75,18.1,30.05,22.933333,23.633333,GO:0090333;GO:0016021;GO:0009705;GO:0005886;GO:0022857;GO:0022821,BP:regulation of stomatal closure;CC:integral component of membrane;CC:plant-type vacuole membrane;CC:plasma membrane;MF:transmembrane transporter activity;MF:potassium ion antiporter activity;,------,------,------,------,ENOG41…
TRINITY_DN20490_c0_g1	molybdate-anion transporter [Dendrobium catenatum])	24.49	20.82	23.43	18.46	25.48	30.62	22.9133	24.8533	GO:0016020;GO:0016021;GO:0015098	CC:membrane;CC:integral component of membrane;MF:molybdate ion transmembrane transporter activity;	------	------	------	------	ENOG410XSP5	G:Carbohydrate transport and metabolism)	sp|Q921Y4|MFSD5_MOUSE;	Molybdate-anion transporter OS=Mus musculus OX=10090 GN=Mfsd5 PE=2 SV=1;	PF05631;PF07690	MFS_5;MFS_1	Sugar-tranasporters, 12 TM;Major Facilitator Superfamily	TRINITY_DN20490_c0_g1,molybdate-anion transporter [Dendrobium catenatum]),24.49,20.82,23.43,18.46,25.48,30.62,22.913333,24.853333,GO:0016020;GO:0016021;GO:0015098,CC:membrane;CC:integral component of membrane;MF:molybdate ion transmembrane transporter activity;,------,------,------,------,ENOG410XSP5,G:Carbohydrate transport and metabolism),sp|Q921Y4|MFSD5_MOUSE;,Molybdate-anion transporter OS=Mu…
TRINITY_DN11417_c0_g2	PREDICTED: organic cation/carnitine transporter 4 [Brassica oleracea var. oleracea])	10	54.66	3	50.41	8.77	7.86	22.5533	22.3467	GO:0042631;GO:0006811;GO:0009535;GO:0016021;GO:0009705;GO:0022857;GO:0005524	BP:cellular response to water deprivation;BP:ion transport;CC:chloroplast thylakoid membrane;CC:integral component of membrane;CC:plant-type vacuole membrane;MF:transmembrane transporter activity;MF:ATP binding;	K08202	SLC22A4_5, OCTN	------	------	ENOG410XSRI	G:Carbohydrate transport and metabolism)	sp|Q9LHQ6|OCT4_ARATH;	Organic cation/carnitine transporter 4 OS=Arabidopsis thaliana OX=3702 GN=OCT4 PE=2 SV=1;	PF07690;PF00083;PF12832	MFS_1;Sugar_tr;MFS_1_like	Major Facilitator Superfamily;Sugar (and other) transporter;MFS_1 like family	TRINITY_DN11417_c0_g2,PREDICTED: organic cation/carnitine transporter 4 [Brassica oleracea var. oleracea]),10,54.66,3,50.41,8.77,7.86,22.553333,22.346667,GO:0042631;GO:0006811;GO:0009535;GO:0016021;GO:0009705;GO:0022857;GO:0005524,BP:cellular response to water deprivation;BP:ion transport;CC:chloroplast thylakoid membrane;CC:integral component of membrane;CC:plant-type vacuole membrane;MF:transme…
TRINITY_DN5739_c0_g1	putative glycerol-3-phosphate transporter 1 [Citrus clementina])	25.03	22.74	17.79	23.71	17.53	24.27	21.8533	21.8367	GO:0016021;GO:0022857	CC:integral component of membrane;MF:transmembrane transporter activity;	K13783	SLC37A1_2	------	------	COG2271	G:Carbohydrate transport and metabolism)	sp|Q9C5L3|GLPT1_ARATH;	Putative glycerol-3-phosphate transporter 1 OS=Arabidopsis thaliana OX=3702 GN=At3g47420 PE=2 SV=1;	PF07690	MFS_1	Major Facilitator Superfamily	TRINITY_DN5739_c0_g1,putative glycerol-3-phosphate transporter 1 [Citrus clementina]),25.03,22.74,17.79,23.71,17.53,24.27,21.853333,21.836667,GO:0016021;GO:0022857,CC:integral component of membrane;MF:transmembrane transporter activity;,K13783,SLC37A1_2,------,------,COG2271,G:Carbohydrate transport and metabolism),sp|Q9C5L3|GLPT1_ARATH;,Putative glycerol-3-phosphate transporter 1 OS=Arabidopsis …
TRINITY_DN23482_c0_g1	major facilitator superfamily domain-containing protein 12-like isoform X2 [Phoenix dactylifera])	19.9	23.08	20	21.38	21.17	21.73	20.9933	21.4267	GO:0071702;GO:0008643;GO:0016021;GO:0005887;GO:0015293	BP:organic substance transport;BP:carbohydrate transport;CC:integral component of membrane;CC:integral component of plasma membrane;MF:symporter activity;	------	------	------	------	COG2211	G:Carbohydrate transport and metabolism)	sp|Q6NUT3|MFS12_HUMAN;	Major facilitator superfamily domain-containing protein 12 OS=Homo sapiens OX=9606 GN=MFSD12 PE=1 SV=2;	PF13347;PF07690;PF12832	MFS_2;MFS_1;MFS_1_like	MFS/sugar transport protein;Major Facilitator Superfamily;MFS_1 like family	TRINITY_DN23482_c0_g1,major facilitator superfamily domain-containing protein 12-like isoform X2 [Phoenix dactylifera]),19.9,23.08,20,21.38,21.17,21.73,20.993333,21.426667,GO:0071702;GO:0008643;GO:0016021;GO:0005887;GO:0015293,BP:organic substance transport;BP:carbohydrate transport;CC:integral component of membrane;CC:integral component of plasma membrane;MF:symporter activity;,------,------,---…
TRINITY_DN3588_c0_g1	high-affinity nitrate transporter 2.1-like [Hevea brasiliensis])	22.59	5.42	34.43	16.23	23.47	29.5	20.8133	23.0667	GO:0016021;GO:0022857	CC:integral component of membrane;MF:transmembrane transporter activity;	K02575	NRT, narK, nrtP, nasA	map00910	Nitrogen metabolism)	COG2223	P:Inorganic ion transport and metabolism)	sp|P0DKG9|NRT21_ORYSJ;	High-affinity nitrate transporter 2.1 OS=Oryza sativa subsp. japonica OX=39947 GN=NRT2.1 PE=1 SV=1;	PF07690	MFS_1	Major Facilitator Superfamily	TRINITY_DN3588_c0_g1,high-affinity nitrate transporter 2.1-like [Hevea brasiliensis]),22.59,5.42,34.43,16.23,23.47,29.5,20.813333,23.066667,GO:0016021;GO:0022857,CC:integral component of membrane;MF:transmembrane transporter activity;,K02575,NRT, narK, nrtP, nasA,map00910,Nitrogen metabolism),COG2223,P:Inorganic ion transport and metabolism),sp|P0DKG9|NRT21_ORYSJ;,High-affinity nitrate transporte…
TRINITY_DN8127_c0_g1	unknown [Picea sitchensis])	24.83	21.94	14.94	22.72	24.7	21.47	20.57	22.9633	GO:0016020;GO:0016021;GO:0015098	CC:membrane;CC:integral component of membrane;MF:molybdate ion transmembrane transporter activity;	------	------	------	------	ENOG410XSP5	G:Carbohydrate transport and metabolism)	sp|Q6N075|MFSD5_HUMAN;	Molybdate-anion transporter OS=Homo sapiens OX=9606 GN=MFSD5 PE=1 SV=2;	PF05631;PF07690	MFS_5;MFS_1	Sugar-tranasporters, 12 TM;Major Facilitator Superfamily	TRINITY_DN8127_c0_g1,unknown [Picea sitchensis]),24.83,21.94,14.94,22.72,24.7,21.47,20.57,22.963333,GO:0016020;GO:0016021;GO:0015098,CC:membrane;CC:integral component of membrane;MF:molybdate ion transmembrane transporter activity;,------,------,------,------,ENOG410XSP5,G:Carbohydrate transport and metabolism),sp|Q6N075|MFSD5_HUMAN;,Molybdate-anion transporter OS=Homo sapiens OX=9606 GN=MFSD5 PE…
TRINITY_DN16479_c0_g2	PREDICTED: monosaccharide-sensing protein 2 [Nelumbo nucifera])	25.47	21.05	13.93	18.02	24.97	31.34	20.15	24.7767	GO:0046323;GO:0008643;GO:0016021;GO:0005887;GO:0005351;GO:0022857;GO:0032440	BP:glucose import;BP:carbohydrate transport;CC:integral component of membrane;CC:integral component of plasma membrane;MF:suga;MF:transmembrane transporter activity;MF:2-alkenal reductase [NA;	------	------	------	------	ENOG410XNQK	G:Carbohydrate transport and metabolism)	sp|Q8LPQ8|MSSP2_ARATH;	Monosaccharide-sensing protein 2 OS=Arabidopsis thaliana OX=3702 GN=MSSP2 PE=1 SV=2;	PF00083;PF07690;PF12832;PF06609	Sugar_tr;MFS_1;MFS_1_like;TRI12	Sugar (and other) transporter;Major Facilitator Superfamily;MFS_1 like family;Fungal trichothecene efflux pump (TRI12)	TRINITY_DN16479_c0_g2,PREDICTED: monosaccharide-sensing protein 2 [Nelumbo nucifera]),25.47,21.05,13.93,18.02,24.97,31.34,20.15,24.776667,GO:0046323;GO:0008643;GO:0016021;GO:0005887;GO:0005351;GO:0022857;GO:0032440,BP:glucose import;BP:carbohydrate transport;CC:integral component of membrane;CC:integral component of plasma membrane;MF:suga;MF:transmembrane transporter activity;MF:2-alkenal reduct…
TRINITY_DN538_c1_g1	LOW QUALITY PROTEIN: protein NRT1/ PTR FAMILY 8.2-like [Herrania umbratica])	18.13	34	6.47	27.34	22.35	0.73	19.5333	16.8067	GO:0006857;GO:0016021;GO:0015333;GO:0022857;GO:1904680;GO:0035673	BP:oligopeptide transport;CC:integral component of membrane;MF:peptid;MF:transmembrane transporter activity;MF:peptide transmembrane transporter activity;MF:oligopeptide transmembrane transporter activity;	K14638	SLC15A3_4, PHT	------	------	COG3104	E:Amino acid transport and metabolism)	sp|P46032|PTR2_ARATH;	Protein NRT1/ PTR FAMILY 8.3 OS=Arabidopsis thaliana OX=3702 GN=NPF8.3 PE=1 SV=1;	PF00854;PF07690	PTR2;MFS_1	POT family;Major Facilitator Superfamily	TRINITY_DN538_c1_g1,LOW QUALITY PROTEIN: protein NRT1/ PTR FAMILY 8.2-like [Herrania umbratica]),18.13,34,6.47,27.34,22.35,0.73,19.533333,16.806667,GO:0006857;GO:0016021;GO:0015333;GO:0022857;GO:1904680;GO:0035673,BP:oligopeptide transport;CC:integral component of membrane;MF:peptid;MF:transmembrane transporter activity;MF:peptide transmembrane transporter activity;MF:oligopeptide transmembrane t…
TRINITY_DN48060_c0_g2	putative polyol transporter 4 [Vitis vinifera])	19.47	17.29	20.87	25.44	24.39	29.1	19.21	26.31	GO:0046323;GO:0005887;GO:0016021;GO:0022857;GO:0005351	BP:glucose import;CC:integral component of plasma membrane;CC:integral component of membrane;MF:transmembrane transporter activity;MF:suga;	------	------	------	------	ENOG410XNQK	G:Carbohydrate transport and metabolism)	sp|Q0WUU6|PLT4_ARATH;	Probable polyol transporter 4 OS=Arabidopsis thaliana OX=3702 GN=PLT4 PE=2 SV=1;	PF00083;PF07690	Sugar_tr;MFS_1	Sugar (and other) transporter;Major Facilitator Superfamily	TRINITY_DN48060_c0_g2,putative polyol transporter 4 [Vitis vinifera]),19.47,17.29,20.87,25.44,24.39,29.1,19.21,26.31,GO:0046323;GO:0005887;GO:0016021;GO:0022857;GO:0005351,BP:glucose import;CC:integral component of plasma membrane;CC:integral component of membrane;MF:transmembrane transporter activity;MF:suga;,------,------,------,------,ENOG410XNQK,G:Carbohydrate transport and metabolism),sp|Q0W…
TRINITY_DN5304_c0_g1	molybdate transporter 1-like [Phoenix dactylifera])	11.73	24.08	20.97	12.19	13.3	15.01	18.9267	13.5	GO:0005773;GO:0016021;GO:0005739;GO:0015098	CC:vacuole;CC:integral component of membrane;CC:mitochondrion;MF:molybdate ion transmembrane transporter activity;	------	------	------	------	ENOG410XTGP	P:Inorganic ion transport and metabolism)	sp|Q0WP36|MOT2_ARATH;	Molybdate transporter 2 OS=Arabidopsis thaliana OX=3702 GN=MOT2 PE=1 SV=2;	PF16983;PF00916	MFS_MOT1;Sulfate_transp	Molybdate transporter of MFS superfamily;Sulfate permease family	TRINITY_DN5304_c0_g1,molybdate transporter 1-like [Phoenix dactylifera]),11.73,24.08,20.97,12.19,13.3,15.01,18.926667,13.5,GO:0005773;GO:0016021;GO:0005739;GO:0015098,CC:vacuole;CC:integral component of membrane;CC:mitochondrion;MF:molybdate ion transmembrane transporter activity;,------,------,------,------,ENOG410XTGP,P:Inorganic ion transport and metabolism),sp|Q0WP36|MOT2_ARATH;,Molybdate tra…
TRINITY_DN5568_c0_g1	NPF family transporter [Pinus pinaster])	18.76	17.73	20.23	19.52	22.45	18.52	18.9067	20.1633	GO:0006857;GO:0016021;GO:0022857	BP:oligopeptide transport;CC:integral component of membrane;MF:transmembrane transporter activity;	K14638	SLC15A3_4, PHT	------	------	COG3104	E:Amino acid transport and metabolism)	sp|Q9M390|PTR1_ARATH;	Protein NRT1/ PTR FAMILY 8.1 OS=Arabidopsis thaliana OX=3702 GN=NPF8.1 PE=1 SV=1;	PF00854;PF07690	PTR2;MFS_1	POT family;Major Facilitator Superfamily	TRINITY_DN5568_c0_g1,NPF family transporter [Pinus pinaster]),18.76,17.73,20.23,19.52,22.45,18.52,18.906667,20.163333,GO:0006857;GO:0016021;GO:0022857,BP:oligopeptide transport;CC:integral component of membrane;MF:transmembrane transporter activity;,K14638,SLC15A3_4, PHT,------,------,COG3104,E:Amino acid transport and metabolism),sp|Q9M390|PTR1_ARATH;,Protein NRT1/ PTR FAMILY 8.1 OS=Arabidopsis …
TRINITY_DN6339_c0_g1	putative glycerol-3-phosphate transporter 1 [Ziziphus jujuba])	11.52	11.59	30.62	10.84	23.56	25.29	17.91	19.8967	GO:0016021;GO:0022857	CC:integral component of membrane;MF:transmembrane transporter activity;	K13783	SLC37A1_2	------	------	COG2271	G:Carbohydrate transport and metabolism)	sp|Q9C5L3|GLPT1_ARATH;	Putative glycerol-3-phosphate transporter 1 OS=Arabidopsis thaliana OX=3702 GN=At3g47420 PE=2 SV=1;	PF07690;PF00083;PF03137	MFS_1;Sugar_tr;OATP	Major Facilitator Superfamily;Sugar (and other) transporter;Organic Anion Transporter Polypeptide (OATP) family	TRINITY_DN6339_c0_g1,putative glycerol-3-phosphate transporter 1 [Ziziphus jujuba]),11.52,11.59,30.62,10.84,23.56,25.29,17.91,19.896667,GO:0016021;GO:0022857,CC:integral component of membrane;MF:transmembrane transporter activity;,K13783,SLC37A1_2,------,------,COG2271,G:Carbohydrate transport and metabolism),sp|Q9C5L3|GLPT1_ARATH;,Putative glycerol-3-phosphate transporter 1 OS=Arabidopsis thalia…
TRINITY_DN7314_c0_g1	probable plastidic glucose transporter 2 [Amborella trichopoda])	23.71	18.72	11.29	16.12	22.8	16.98	17.9067	18.6333	GO:0008643;GO:0016021;GO:0022857	BP:carbohydrate transport;CC:integral component of membrane;MF:transmembrane transporter activity;	------	------	------	------	ENOG410XNQK	G:Carbohydrate transport and metabolism)	sp|Q2V4B9|PLST3_ARATH;	Probable plastidic glucose transporter 3 OS=Arabidopsis thaliana OX=3702 GN=At1g79820 PE=2 SV=2;	PF00083;PF07690;PF13347	Sugar_tr;MFS_1;MFS_2	Sugar (and other) transporter;Major Facilitator Superfamily;MFS/sugar transport protein	TRINITY_DN7314_c0_g1,probable plastidic glucose transporter 2 [Amborella trichopoda]),23.71,18.72,11.29,16.12,22.8,16.98,17.906667,18.633333,GO:0008643;GO:0016021;GO:0022857,BP:carbohydrate transport;CC:integral component of membrane;MF:transmembrane transporter activity;,------,------,------,------,ENOG410XNQK,G:Carbohydrate transport and metabolism),sp|Q2V4B9|PLST3_ARATH;,Probable plastidic glu…
TRINITY_DN15656_c0_g1	hypothetical protein E2562_015765 [Oryza meyeriana var. granulata])	15.85	16.1	21.47	13.61	39.1	19.06	17.8067	23.9233	GO:0090333;GO:0016021;GO:0009705;GO:0005886;GO:0022857;GO:0022821	BP:regulation of stomatal closure;CC:integral component of membrane;CC:plant-type vacuole membrane;CC:plasma membrane;MF:transmembrane transporter activity;MF:potassium ion antiporter activity;	------	------	------	------	------	------	sp|Q94BZ1|ZIFL1_ARATH;	Protein ZINC INDUCED FACILITATOR-LIKE 1 OS=Arabidopsis thaliana OX=3702 GN=ZIFL1 PE=2 SV=1;	PF07690;PF00083	MFS_1;Sugar_tr	Major Facilitator Superfamily;Sugar (and other) transporter	TRINITY_DN15656_c0_g1,hypothetical protein E2562_015765 [Oryza meyeriana var. granulata]),15.85,16.1,21.47,13.61,39.1,19.06,17.806667,23.923333,GO:0090333;GO:0016021;GO:0009705;GO:0005886;GO:0022857;GO:0022821,BP:regulation of stomatal closure;CC:integral component of membrane;CC:plant-type vacuole membrane;CC:plasma membrane;MF:transmembrane transporter activity;MF:potassium ion antiporter activ…
TRINITY_DN4280_c0_g2	unknown [Picea sitchensis])	18.73	19.31	14.39	17.71	23.55	21.15	17.4767	20.8033	GO:0046323;GO:0016021;GO:0005887;GO:0005351;GO:0022857;GO:0032440	BP:glucose import;CC:integral component of membrane;CC:integral component of plasma membrane;MF:suga;MF:transmembrane transporter activity;MF:2-alkenal reductase [NA;	K08145	SLC2A8, GLUT8	------	------	ENOG410XNQK	G:Carbohydrate transport and metabolism)	sp|Q93YP9|ERDL4_ARATH;	Sugar transporter ERD6-like 4 OS=Arabidopsis thaliana OX=3702 GN=At1g19450 PE=2 SV=1;	PF00083;PF07690	Sugar_tr;MFS_1	Sugar (and other) transporter;Major Facilitator Superfamily	TRINITY_DN4280_c0_g2,unknown [Picea sitchensis]),18.73,19.31,14.39,17.71,23.55,21.15,17.476667,20.803333,GO:0046323;GO:0016021;GO:0005887;GO:0005351;GO:0022857;GO:0032440,BP:glucose import;CC:integral component of membrane;CC:integral component of plasma membrane;MF:suga;MF:transmembrane transporter activity;MF:2-alkenal reductase [NA;,K08145,SLC2A8, GLUT8,------,------,ENOG410XNQK,G:Carbohydrate…
TRINITY_DN16551_c0_g1	unknown [Picea sitchensis])	17.32	16.18	18.47	18.95	13.48	19.08	17.3233	17.17	GO:0016021;GO:0022857	CC:integral component of membrane;MF:transmembrane transporter activity;	------	------	------	------	ENOG410XSE0	G:Carbohydrate transport and metabolism)	sp|Q3EAQ5|PTR36_ARATH;	Probable peptide/nitrate transporter At3g43790 OS=Arabidopsis thaliana OX=3702 GN=ZIFL2 PE=2 SV=2;	PF07690;PF00083;PF12832	MFS_1;Sugar_tr;MFS_1_like	Major Facilitator Superfamily;Sugar (and other) transporter;MFS_1 like family	TRINITY_DN16551_c0_g1,unknown [Picea sitchensis]),17.32,16.18,18.47,18.95,13.48,19.08,17.323333,17.17,GO:0016021;GO:0022857,CC:integral component of membrane;MF:transmembrane transporter activity;,------,------,------,------,ENOG410XSE0,G:Carbohydrate transport and metabolism),sp|Q3EAQ5|PTR36_ARATH;,Probable peptide/nitrate transporter At3g43790 OS=Arabidopsis thaliana OX=3702 GN=ZIFL2 PE=2 SV=2;…
TRINITY_DN11417_c0_g1	organic cation/carnitine transporter 4 [Prunus avium])	22.87	20.14	8.87	23.81	20.57	21.7	17.2933	22.0267	GO:0042631;GO:0009535;GO:0016021;GO:0009705;GO:0022857	BP:cellular response to water deprivation;CC:chloroplast thylakoid membrane;CC:integral component of membrane;CC:plant-type vacuole membrane;MF:transmembrane transporter activity;	K08202	SLC22A4_5, OCTN	------	------	ENOG410XSRI	G:Carbohydrate transport and metabolism)	sp|Q9LHQ6|OCT4_ARATH;	Organic cation/carnitine transporter 4 OS=Arabidopsis thaliana OX=3702 GN=OCT4 PE=2 SV=1;	PF07690;PF00083	MFS_1;Sugar_tr	Major Facilitator Superfamily;Sugar (and other) transporter	TRINITY_DN11417_c0_g1,organic cation/carnitine transporter 4 [Prunus avium]),22.87,20.14,8.87,23.81,20.57,21.7,17.293333,22.026667,GO:0042631;GO:0009535;GO:0016021;GO:0009705;GO:0022857,BP:cellular response to water deprivation;CC:chloroplast thylakoid membrane;CC:integral component of membrane;CC:plant-type vacuole membrane;MF:transmembrane transporter activity;,K08202,SLC22A4_5, OCTN,------,---…
[truncated: 277 more rows]

## Sheet: ACR
Gene_id	NR description	CE4	CE2	CE1	CK3	CK2	CK1	CE	CK	GO_id	GO_term	KO_id	KO_name	Pathway_id	Pathway_definition	EggNOG_id	EggNOG_Functional Categories	Swiss-Prot_hit-name	Swiss-Prot_description	Pfam_id	Domain	Domain description
[truncated: 69 more rows]

[truncated: 5 more sheets: MIP, PHT, NRT, P-typeATP, Intersection of Leading Edge an]
