# Supplementary material for: Claroideglomus etunicatum enhances Pteris vittata L. arsenic resistance and accumulation by mediating the rapid reduction and transport of arsenic in roots
Source: Front Plant Sci. 2024 Nov 13;15:1464547. doi: 10.3389/fpls.2024.1464547 (PMC11598345; doi:10.3389/fpls.2024.1464547)
Supplement: Supplementary file 6 [file DataSheet5.xlsx]

## Sheet: Sheet1
gene id	Nr description	rank in gene set	rank metric score	running ES	core enrichment
ABC
TRINITY_DN24191_c0_g1	PREDICTED: ABC transporter C family member 3-like isoform X2 [Daucus carota subsp. sativus])	11810	-0.261102	-0.207085	Yes
TRINITY_DN53757_c0_g1	ABC transporter G family member 11 [Morella rubra])	11886	-0.267058	-0.203641	Yes
TRINITY_DN7824_c0_g1	unknown [Picea sitchensis])	12016	-0.277206	-0.203515	Yes
TRINITY_DN10155_c0_g1	PREDICTED: ABC transporter C family member 8-like [Vigna angularis])	12084	-0.281949	-0.199057	Yes
TRINITY_DN7720_c0_g1	ABC transporter A family member 7-like isoform X1 [Vitis riparia])	12268	-0.297216	-0.201937	Yes
TRINITY_DN4698_c0_g1	ABC transporter C family member 14-like [Hevea brasiliensis])	12319	-0.302142	-0.195689	Yes
TRINITY_DN233_c1_g1	ABC transporter C family member 8 [Cinnamomum micranthum f. kanehirae])	12328	-0.302917	-0.186583	Yes
TRINITY_DN11813_c0_g1	hypothetical protein F0562_003214 [Nyssa sinensis])	12434	-0.311257	-0.183755	Yes
TRINITY_DN1976_c0_g1	predicted protein [Hordeum vulgare subsp. vulgare])	12759	-0.341273	-0.194743	Yes
TRINITY_DN3953_c0_g1	ABC transporter C family member 8-like [Prunus avium])	12765	-0.341526	-0.184206	Yes
TRINITY_DN13772_c0_g1	ABC transporter C family member 13 isoform X1 [Cajanus cajan])	12991	-0.364773	-0.187768	Yes
TRINITY_DN6228_c0_g1	PREDICTED: ABC transporter G family member 36-like [Nelumbo nucifera])	13105	-0.375902	-0.183421	Yes
TRINITY_DN20789_c0_g1	ABC transporter C family member 8 like [Actinidia chinensis var. chinensis])	13155	-0.380819	-0.1746	Yes
TRINITY_DN26370_c0_g2	hypothetical protein TanjilG_14261 [Lupinus angustifolius])	13303	-0.399385	-0.171798	Yes
TRINITY_DN44132_c0_g2	putative ABC transporter C family member 13 [Helianthus annuus])	13350	-0.405138	-0.162001	Yes
TRINITY_DN2547_c0_g1	ABC transporter C family member 14-like [Nymphaea colorata])	13403	-0.411815	-0.152396	Yes
TRINITY_DN52162_c0_g3	hypothetical protein F2Q69_00038571 [Brassica cretica])	13619	-0.441777	-0.152831	Yes
TRINITY_DN21608_c0_g3	Multidrug resistance protein ABC transporter family [Zostera marina])	13751	-0.464035	-0.146892	Yes
TRINITY_DN2071_c0_g1	ABC transporter G family member 37-like [Hevea brasiliensis])	14114	-0.542822	-0.154026	Yes
TRINITY_DN15631_c0_g1	hypothetical protein AMTR_s00040p00185210 [Amborella trichopoda])	14229	-0.567708	-0.143639	Yes
TRINITY_DN4333_c0_g1	serotransferrin [Amborella trichopoda])	14236	-0.569614	-0.125906	Yes
TRINITY_DN2784_c1_g1	hypothetical protein Saspl_008520 [Salvia splendens])	14395	-0.618104	-0.116882	Yes
TRINITY_DN44211_c0_g1	hypothetical protein 0_16607_01, partial [Pinus mugo])	14499	-0.662596	-0.102731	Yes
TRINITY_DN1620_c0_g1	PREDICTED: pleiotropic drug resistance protein 2-like isoform X1 [Nelumbo nucifera])	14611	-0.723162	-0.087192	Yes
TRINITY_DN2318_c0_g1		14689	-0.77516	-0.0677034	Yes
TRINITY_DN6622_c0_g1	uncharacterized protein LOC103713116 isoform X1 [Phoenix dactylifera])	14792	-0.875196	-0.0467159	Yes
TRINITY_DN31910_c0_g2	ABC transporter B family member 4 [Capsicum chinense])	14793	-0.875847	-0.0188273	Yes
TRINITY_DN9151_c0_g1	PREDICTED: pleiotropic drug resistance protein 2-like [Nelumbo nucifera])	14833	-0.932336	0.00822923	Yes
MIP
TRINITY_DN4244_c0_g1	fe-S cluster assembly factor HCF101, chloroplastic	97	0.95	0.09	Yes
TRINITY_DN13097_c0_g1	aquaporin NIP6-1	156	0.85	0.17	Yes
TRINITY_DN3277_c0_g1	aquaporin PIP2-1	225	0.78	0.24	Yes
TRINITY_DN1610_c1_g1	aquaporin PIP1-1	559	0.59	0.28	Yes
TRINITY_DN2830_c0_g1	unknown	855	0.5	0.3	Yes
TRINITY_DN11982_c0_g1	Aquaporin NIP1-3	873	0.49	0.35	Yes
TRINITY_DN2123_c0_g1	PREDICTED: probable aquaporin NIP-type	879	0.49	0.4	Yes
PHT
TRINITY_DN5566_c0_g1	inorganic phosphate transporter 2-1, chloroplastic	359	0.67	0.08	Yes
TRINITY_DN688_c0_g1	Low affinity inorganic phosphate transporter 3	915	0.48	0.12	Yes
TRINITY_DN11245_c0_g1	inorganic phosphate transporter 2-1, chloroplastic	961	0.47	0.2	Yes
TRINITY_DN12076_c0_g3	phosphate transporter PHO1-3-like	970	0.47	0.27	Yes
TRINITY_DN6924_c0_g1	Late exocytosis, associated with Golgi transport;Cytosolic domain of 10TM putative phosphate transporter	1962	0.33	0.26	Yes
TRINITY_DN4_c0_g1	Calcium-dependent channel, 7TM region, putative phosphate;Cytosolic domain of 10TM putative phosphate transporter;Late exocytosis, associated with Golgi transport	2034	0.32	0.3	Yes
TRINITY_DN1581_c0_g1	Inorganic phosphate transporter 2-1, chloroplastic	2350	0.28	0.33	Yes
NRT
TRINITY_DN158_c0_g1	protein NRT1/ PTR FAMILY 5.1-like	71	1.04	0.15	Yes
TRINITY_DN1542_c0_g1	Protein NRT1/ PTR FAMILY 8.3	987	0.47	0.15	Yes
TRINITY_DN5117_c0_g1	NRT1/ PTR FAMILY 8.3	1363	0.41	0.19	Yes
TRINITY_DN13756_c0_g1	NRT1-PTR FAMILY 6-3 protein	1456	0.39	0.24	Yes
TRINITY_DN8595_c0_g1	Protein NRT1/ PTR FAMILY 8.1	1664	0.36	0.27	Yes
TRINITY_DN14280_c0_g1	NRT1-PTR FAMILY 6-3 protein	1810	0.34	0.31	Yes
TRINITY_DN20533_c0_g1	protein NRT1/ PTR FAMILY 6.3	2041	0.32	0.35	Yes
MFS
TRINITY_DN8127_c0_g1	unknown [Picea sitchensis])	11636	-0.247296	-0.175012	Yes
TRINITY_DN5342_c0_g1	PREDICTED: probable inositol transporter 2 [Nelumbo nucifera])	11649	-0.248248	-0.162955	Yes
TRINITY_DN18724_c0_g1	Sugar carrier protein C [Ananas comosus])	11651	-0.248452	-0.150149	Yes
TRINITY_DN10546_c0_g2	high-affinity nitrate transporter 2.1 [Amborella trichopoda])	12110	-0.284071	-0.166217	Yes
TRINITY_DN7869_c0_g1	organic cation/carnitine transporter 7-like [Amborella trichopoda])	12116	-0.284426	-0.151815	Yes
TRINITY_DN5242_c0_g1	D-xylose-proton symporter-like 2 [Hordeum vulgare])	12138	-0.286506	-0.138381	Yes
TRINITY_DN383_c0_g1	probable folate-biopterin transporter 2 [Zea mays])	12696	-0.334062	-0.158514	Yes
TRINITY_DN10546_c0_g1	high-affinity nitrate transporter 2.1 [Amborella trichopoda])	12894	-0.355698	-0.153326	Yes
TRINITY_DN15656_c0_g1	hypothetical protein E2562_015765 [Oryza meyeriana var. granulata])	12948	-0.360138	-0.138228	Yes
TRINITY_DN16479_c0_g2	PREDICTED: monosaccharide-sensing protein 2 [Nelumbo nucifera])	13055	-0.370593	-0.126151	Yes
TRINITY_DN28202_c0_g1	protein WHAT'S THIS FACTOR 1 homolog, chloroplastic [Vitis riparia])	13190	-0.385621	-0.115177	Yes
TRINITY_DN11417_c0_g1	organic cation/carnitine transporter 4 [Prunus avium])	13311	-0.400222	-0.102506	Yes
TRINITY_DN5709_c0_g1	unnamed protein product [Digitaria exilis])	13425	-0.414939	-0.0886015	Yes
TRINITY_DN14071_c0_g2	unknown [Picea sitchensis])	13544	-0.430432	-0.0742304	Yes
TRINITY_DN4280_c0_g2	unknown [Picea sitchensis])	13572	-0.434518	-0.0535304	Yes
TRINITY_DN37464_c0_g2	hypothetical protein C4D60_Mb05t30660 [Musa balbisiana])	13580	-0.435632	-0.0314282	Yes
TRINITY_DN5377_c1_g1	Major facilitator superfamily [Macleaya cordata])	13733	-0.461616	-0.0177268	Yes
TRINITY_DN5357_c0_g1	unknown [Picea sitchensis])	13783	-0.470542	0.00336097	Yes
TRINITY_DN4047_c0_g1	probable plastidic glucose transporter 2 [Amborella trichopoda])	14521	-0.673128	-0.011303	Yes
TRINITY_DN48060_c0_g2	putative polyol transporter 4 [Vitis vinifera])	14696	-0.779877	0.0174105	Yes
ACR
TRINITY_DN16620_c0_g2	unknown [Picea sitchensis])	216	0.782854	0.0907718	Yes
TRINITY_DN918_c0_g1	unknown [Picea sitchensis])	403	0.654122	0.166247	Yes
TRINITY_DN2794_c2_g1	unknown [Picea sitchensis])	815	0.504798	0.206573	Yes
TRINITY_DN1907_c0_g1	unknown [Picea sitchensis])	1296	0.415743	0.230303	Yes
TRINITY_DN23539_c0_g1	unknown [Picea sitchensis])	1577	0.372517	0.261622	Yes
P-type ATPase
TRINITY_DN2678_c0_g1	phospholipid-transporting ATPase 1 [Amborella trichopoda])	9522	-0.120381	-0.326356	Yes
TRINITY_DN5918_c0_g1	hypothetical protein EJB05_07652 [Eragrostis curvula])	9780	-0.134969	-0.321226	Yes
TRINITY_DN11421_c0_g1	PREDICTED: phospholipid-transporting ATPase 3-like [Nelumbo nucifera])	9853	-0.138561	-0.303111	Yes
TRINITY_DN3300_c0_g1	PREDICTED: phospholipid-transporting ATPase 1-like [Nelumbo nucifera])	10001	-0.146997	-0.288622	Yes
TRINITY_DN2110_c0_g1	hypothetical protein FH972_023584 [Carpinus fangiana])	10863	-0.196975	-0.313686	Yes
TRINITY_DN9808_c0_g1	hypothetical protein D5086_0000210050 [Populus alba])	10952	-0.202406	-0.286072	Yes
TRINITY_DN5480_c0_g1	hypothetical protein ES319_D03G109300v1 [Gossypium barbadense])	11070	-0.208949	-0.259318	Yes
TRINITY_DN3966_c0_g1	calcium-transporting ATPase 10, plasma membrane-type-like [Manihot esculenta])	11592	-0.24427	-0.253777	Yes
TRINITY_DN3558_c0_g1	putative phospholipid-transporting ATPase 9 isoform X1 [Cinnamomum micranthum f. kanehirae])	12270	-0.297304	-0.249907	Yes
TRINITY_DN2602_c0_g1	PREDICTED: probable phospholipid-transporting ATPase 4 [Nelumbo nucifera])	13092	-0.373466	-0.243073	Yes
TRINITY_DN5669_c0_g1	PREDICTED: phospholipid-transporting ATPase 2 [Nelumbo nucifera])	13260	-0.394411	-0.188965	Yes
TRINITY_DN10629_c0_g1	Cation-transporting P-type ATPase [Macleaya cordata])	13414	-0.413912	-0.13069	Yes
TRINITY_DN4406_c0_g1	putative phospholipid-transporting ATPase 9 [Jatropha curcas])	13937	-0.501897	-0.0825667	Yes
TRINITY_DN30016_c0_g1	predicted protein [Hordeum vulgare subsp. vulgare])	14819	-0.910234	0.00910978	Yes
